# Supplementary material for: A transcription network underlies the dual genomic coordination of mitochondrial biogenesis
Source: bioRxiv preprint, doi:10.1101/2024.01.25.577217, version 3 (2024-09-16)
Supplement: Supplementary file 5 [file 577217_file19.xlsx]

## Sheet: Supplementary file 5a
ID	SYMBOL	ENTREZID	log2FoldChange	padj	Mitochondria	mtDNA_replication	Transcription_mito	RNA_metabolism_mito	Translation_mito	ETC	tsETC	Protein_import_insertion_mito	TCA	Heme_metabolism
FBgn0029645	CG14422	31286	-14.9085	0	Others	Others	Others	Others	Others	Others	Others	Others	Others	Others
FBgn0069923	CG41128	3355108	-13.1826	7.52e-25	Mitochondria	Others	Others	Others	Others	Others	Others	Protein_import_insertion_mito	Others	Others
FBgn0004429	LysP	38129	-9.00616	9.53e-09	Others	Others	Others	Others	Others	Others	Others	Others	Others	Others
FBgn0032303	CG6508	34493	-8.54862	2.11e-07	Others	Others	Others	Others	Others	Others	Others	Others	Others	Others
FBgn0036465	Rpn12R	2768973	-7.53054	0.000424897	Others	Others	Others	Others	Others	Others	Others	Others	Others	Others
FBgn0050379	CG30379	246578	-7.49756	0.0001704	Others	Others	Others	Others	Others	Others	Others	Others	Others	Others
FBgn0015714	Cyp6a17	45556	-7.44454	6.07e-187	Others	Others	Others	Others	Others	Others	Others	Others	Others	Others
FBgn0263849	CG43710	14462612	-7.4265	1.46e-21	Others	Others	Others	Others	Others	Others	Others	Others	Others	Others
FBgn0025616	CG13359	31028	-7.24932	0.0156794	Others	Others	Others	Others	Others	Others	Others	Others	Others	Others
FBgn0083946	lobo	4379864	-7.17147	0.0225665	Others	Others	Others	Others	Others	Others	Others	Others	Others	Others
FBgn0038611	CG14309	42212	-7.09681	0.00134158	Others	Others	Others	Others	Others	Others	Others	Others	Others	Others
FBgn0085197	CG34168	50457	-7.03402	0.00254413	Others	Others	Others	Others	Others	Others	Others	Others	Others	Others
FBgn0052971	CG32971	318271	-6.98681	2.78e-07	Others	Others	Others	Others	Others	Others	Others	Others	Others	Others
FBgn0038790	MtnC	42416	-6.97955	0.00191669	Others	Others	Others	Others	Others	Others	Others	Others	Others	Others
FBgn0052551	CG32551	318085	-6.7633	0.0487048	Others	Others	Others	Others	Others	Others	Others	Others	Others	Others
FBgn0002939	ninaD	326160	-6.67405	1.91e-24	Others	Others	Others	Others	Others	Others	Others	Others	Others	Others
FBgn0052088	sunn	326196	-6.61138	0.00698824	Others	Others	Others	Others	Others	Others	Others	Others	Others	Others
FBgn0034415	CG15116	37194	-6.57118	0.00811318	Others	Others	Others	Others	Others	Others	Others	Others	Others	Others
FBgn0052376	CG32376	318002	-6.53402	2.56e-45	Others	Others	Others	Others	Others	Others	Others	Others	Others	Others
FBgn0050031	CG30031	246404	-6.49677	6.67e-09	Others	Others	Others	Others	Others	Others	Others	Others	Others	Others
FBgn0034426	AANATL5	37210	-6.1251	4.97e-08	Others	Others	Others	Others	Others	Others	Others	Others	Others	Others
FBgn0033440	CG10459	36000	-6.03846	0.0409592	Others	Others	Others	Others	Others	Others	Others	Others	Others	Others
FBgn0037449	CG15185	40798	-6.01576	0.00109082	Others	Others	Others	Others	Others	Others	Others	Others	Others	Others
FBgn0031728	Hsp60C	33796	-6.00813	2.87e-07	Mitochondria	Others	Others	Others	Others	Others	Others	Protein_import_insertion_mito	Others	Others
FBgn0039124	tbrd-1	42823	-5.95764	0.000509695	Others	Others	Others	Others	Others	Others	Others	Others	Others	Others
FBgn0040338	TfIIA-S-2	31048	-5.95236	0.0491166	Others	Others	Others	Others	Others	Others	Others	Others	Others	Others
FBgn0058263	MFS17	3354861	-5.94094	2.05e-21	Others	Others	Others	Others	Others	Others	Others	Others	Others	Others
FBgn0038826	Syp	42460	-5.91105	1.33e-148	Others	Others	Others	Others	Others	Others	Others	Others	Others	Others
FBgn0029963	CG10920	31688	-5.8484	0.0115758	Others	Others	Others	Others	Others	Others	Others	Others	Others	Others
FBgn0039313	CG11892	43053	-5.7582	3.36e-303	Others	Others	Others	Others	Others	Others	Others	Others	Others	Others
FBgn0033021	CG10417	35492	-5.67008	0	Others	Others	Others	Others	Others	Others	Others	Others	Others	Others
FBgn0051091	CG31091	318591	-5.66863	3.1e-31	Others	Others	Others	Others	Others	Others	Others	Others	Others	Others
FBgn0004425	LysB	38125	-5.61302	3.7e-104	Others	Others	Others	Others	Others	Others	Others	Others	Others	Others
FBgn0034429	AANATL4	37213	-5.56562	2.63e-110	Others	Others	Others	Others	Others	Others	Others	Others	Others	Others
FBgn0051810	CG31810	318955	-5.51617	0.00140954	Others	Others	Others	Others	Others	Others	Others	Others	Others	Others
FBgn0030918	CG15056	32824	-5.39324	5.98e-05	Others	Others	Others	Others	Others	Others	Others	Others	Others	Others
FBgn0263977	Tim17b	3355107	-5.26571	0	Mitochondria	Others	Others	Others	Others	Others	Others	Protein_import_insertion_mito	Others	Others
FBgn0034441	CG10081	37226	-5.24655	3.86e-09	Others	Others	Others	Others	Others	Others	Others	Others	Others	Others
FBgn0043575	PGRP-SC2	35862	-5.22108	6.43e-213	Others	Others	Others	Others	Others	Others	Others	Others	Others	Others
FBgn0031622	CG3251	33671	-5.03999	4.26e-19	Others	Others	Others	Others	Others	Others	Others	Others	Others	Others
FBgn0052793	CG32793	31280	-5.01153	0	Others	Others	Others	Others	Others	Others	Others	Others	Others	Others
FBgn0029643	CG14420	31284	-4.98748	0	Others	Others	Others	Others	Others	Others	Others	Others	Others	Others
FBgn0031791	AANATL2	33874	-4.9828	7.46e-55	Others	Others	Others	Others	Others	Others	Others	Others	Others	Others
FBgn0051865	Ada1-1	318991	-4.9507	0.0235959	Others	Others	Others	Others	Others	Others	Others	Others	Others	Others
FBgn0025644	CG14424	31279	-4.92133	0	Others	Others	Others	Others	Others	Others	Others	Others	Others	Others
FBgn0040353	CG14417	31274	-4.87472	0	Others	Others	Others	Others	Others	Others	Others	Others	Others	Others
FBgn0034880	ItgaPS5	37732	-4.80751	1.76e-06	Others	Others	Others	Others	Others	Others	Others	Others	Others	Others
FBgn0030492	CG15754	32307	-4.79065	1.15e-05	Others	Others	Others	Others	Others	Others	Others	Others	Others	Others
FBgn0025578	Lcp9	37963	-4.78987	8.03e-08	Others	Others	Others	Others	Others	Others	Others	Others	Others	Others
FBgn0031155	CG15446	33088	-4.78642	0.0231388	Others	Others	Others	Others	Others	Others	Others	Others	Others	Others
FBgn0038225	soti	41748	-4.75615	0.0242378	Others	Others	Others	Others	Others	Others	Others	Others	Others	Others
FBgn0039312	CG10514	43052	-4.72363	0	Others	Others	Others	Others	Others	Others	Others	Others	Others	Others
FBgn0040104	lectin-24A	53543	-4.7062	2.79e-15	Others	Others	Others	Others	Others	Others	Others	Others	Others	Others
FBgn0052064	S-Lap4	326188	-4.69842	0.00267544	Mitochondria	Others	Others	Others	Others	Others	Others	Others	Others	Others
FBgn0052374	CG32374	38848	-4.64068	8.57e-128	Others	Others	Others	Others	Others	Others	Others	Others	Others	Others
FBgn0002734	E(spl)mdelta-HLH	43150	-4.62513	0.0428057	Others	Others	Others	Others	Others	Others	Others	Others	Others	Others
FBgn0030493	CG15756	32308	-4.62166	0.000120616	Others	Others	Others	Others	Others	Others	Others	Others	Others	Others
FBgn0034840	CG3124	37688	-4.61707	0.0201422	Others	Others	Others	Others	Others	Others	Others	Others	Others	Others
FBgn0250836	Acbp3	38783	-4.61527	1.28e-211	Others	Others	Others	Others	Others	Others	Others	Others	Others	Others
FBgn0263743	CG43668	14462617	-4.59428	1e-158	Others	Others	Others	Others	Others	Others	Others	Others	Others	Others
FBgn0034667	comr	37492	-4.58202	0.0281414	Others	Others	Others	Others	Others	Others	Others	Others	Others	Others
FBgn0030097	CG12115	31853	-4.51295	1.81e-21	Others	Others	Others	Others	Others	Others	Others	Others	Others	Others
FBgn0010043	GstD7	48340	-4.50727	3.21e-177	Others	Others	Others	Others	Others	Others	Others	Others	Others	Others
FBgn0039202	CG13622	42923	-4.41871	0.000443187	Others	Others	Others	Others	Others	Others	Others	Others	Others	Others
FBgn0028513	CG9254	34773	-4.40343	0.00028385	Others	Others	Others	Others	Others	Others	Others	Others	Others	Others
FBgn0033601	Cpr47Ed	36192	-4.30593	7.08e-87	Others	Others	Others	Others	Others	Others	Others	Others	Others	Others
FBgn0025620	CG13360	31025	-4.28517	0	Others	Others	Others	Others	Others	Others	Others	Others	Others	Others
FBgn0031559	CG3513	33590	-4.2776	0.0274955	Others	Others	Others	Others	Others	Others	Others	Others	Others	Others
FBgn0029532	CG13361	31019	-4.09929	5.95e-12	Others	Others	Others	Others	Others	Others	Others	Others	Others	Others
FBgn0035550	CG11349	38552	-4.07347	2.12e-37	Others	Others	Others	Others	Others	Others	Others	Others	Others	Others
FBgn0035430	CG12009	38405	-4.05991	0	Others	Others	Others	Others	Others	Others	Others	Others	Others	Others
FBgn0039471	CG6295	43247	-4.00128	0	Others	Others	Others	Others	Others	Others	Others	Others	Others	Others
FBgn0036861	CG14089	40101	-3.98966	0	Others	Others	Others	Others	Others	Others	Others	Others	Others	Others
FBgn0044048	Ilp5	2768992	-3.95423	9.83e-10	Others	Others	Others	Others	Others	Others	Others	Others	Others	Others
FBgn0036809	CG12477	40040	-3.90217	5.06e-21	Others	Others	Others	Others	Others	Others	Others	Others	Others	Others
FBgn0039053	CG6738	42732	-3.89568	2.9e-14	Others	Others	Others	Others	Others	Others	Others	Others	Others	Others
FBgn0031264	CG11835	33232	-3.87754	2.15e-91	Others	Others	Others	Others	Others	Others	Others	Others	Others	Others
FBgn0033395	Cyp4p2	35946	-3.8661	3.32e-78	Others	Others	Others	Others	Others	Others	Others	Others	Others	Others
FBgn0032058	CG9289	34195	-3.85825	0	Others	Others	Others	Others	Others	Others	Others	Others	Others	Others
FBgn0035789	mthl6	38839	-3.85259	1.3e-08	Others	Others	Others	Others	Others	Others	Others	Others	Others	Others
FBgn0052603	CG32603	318109	-3.80191	2.07e-165	Others	Others	Others	Others	Others	Others	Others	Others	Others	Others
FBgn0004428	LysE	38128	-3.79452	5.06e-34	Others	Others	Others	Others	Others	Others	Others	Others	Others	Others
FBgn0262816	CG43187	12798317	-3.74887	2.06e-05	Others	Others	Others	Others	Others	Others	Others	Others	Others	Others
FBgn0032057	CG9287	34194	-3.72753	0	Others	Others	Others	Others	Others	Others	Others	Others	Others	Others
FBgn0011569	can	45432	-3.7178	0.0288557	Others	Others	Others	Others	Others	Others	Others	Others	Others	Others
FBgn0038468	CG5225	42053	-3.69273	4.96e-206	Others	Others	Others	Others	Others	Others	Others	Others	Others	Others
FBgn0052601	betaNACtes3	326224	-3.6758	0.0331486	Others	Others	Others	Others	Others	Others	Others	Others	Others	Others
FBgn0035750	CG14826	38791	-3.67434	1.8e-78	Others	Others	Others	Others	Others	Others	Others	Others	Others	Others
FBgn0026755	Ugt37B1	53584	-3.67086	7.15e-77	Others	Others	Others	Others	Others	Others	Others	Others	Others	Others
FBgn0040718	CG15353	50191	-3.66273	6.56e-19	Others	Others	Others	Others	Others	Others	Others	Others	Others	Others
FBgn0025645	CG3598	31283	-3.65805	0	Others	Others	Others	Others	Others	Others	Others	Others	Others	Others
FBgn0043865	SA-2	38167	-3.65297	0.0107225	Others	Others	Others	Others	Others	Others	Others	Others	Others	Others
FBgn0030975	SdhBL	32887	-3.64071	0.0045381	Mitochondria	Others	Others	Others	Others	ETC	tsETC	Others	TCA	Others
FBgn0263741	CG43666	14462614	-3.63913	0	Others	Others	Others	Others	Others	Others	Others	Others	Others	Others
FBgn0004430	LysS	38130	-3.63076	1.98e-179	Others	Others	Others	Others	Others	Others	Others	Others	Others	Others
FBgn0051477	ATPsynepsilonL	326144	-3.62972	4.34e-05	Mitochondria	Others	Others	Others	Others	ETC	tsETC	Others	Others	Others
FBgn0030170	CG2990	31934	-3.61547	3.27e-25	Others	Others	Others	Others	Others	Others	Others	Others	Others	Others
FBgn0039473	CG17191	43249	-3.61507	2.15e-37	Others	Others	Others	Others	Others	Others	Others	Others	Others	Others
FBgn0050288	CG30288	246531	-3.60647	2.71e-07	Others	Others	Others	Others	Others	Others	Others	Others	Others	Others
FBgn0034837	RpL22-like	37684	-3.55573	3.76e-08	Others	Others	Others	Others	Others	Others	Others	Others	Others	Others
FBgn0259791	bora	40031	-3.55284	0.00136059	Others	Others	Others	Others	Others	Others	Others	Others	Others	Others
FBgn0037042	CG12984	40321	-3.54351	0.0489169	Others	Others	Others	Others	Others	Others	Others	Others	Others	Others
FBgn0050025	CG30025	246398	-3.5356	7.86e-15	Others	Others	Others	Others	Others	Others	Others	Others	Others	Others
FBgn0051437	CG31437	318735	-3.52988	4.96e-182	Others	Others	Others	Others	Others	Others	Others	Others	Others	Others
FBgn0040354	CG14418	31275	-3.51178	0	Others	Others	Others	Others	Others	Others	Others	Others	Others	Others
FBgn0039194	CG13614	42911	-3.49239	1.96e-35	Others	Others	Others	Others	Others	Others	Others	Others	Others	Others
FBgn0011653	mas	38499	-3.4633	0	Others	Others	Others	Others	Others	Others	Others	Others	Others	Others
FBgn0036349	SNCF	39496	-3.44774	2.02e-12	Others	Others	Others	Others	Others	Others	Others	Others	Others	Others
FBgn0053012	CG33012	36342	-3.44751	1.64e-55	Others	Others	Others	Others	Others	Others	Others	Others	Others	Others
FBgn0032803	CG13082	35244	-3.44547	2.4e-184	Others	Others	Others	Others	Others	Others	Others	Others	Others	Others
FBgn0034551	CG15225	37354	-3.42605	1.66e-104	Others	Others	Others	Others	Others	Others	Others	Others	Others	Others
FBgn0038492	Mur89F	42080	-3.42436	0	Others	Others	Others	Others	Others	Others	Others	Others	Others	Others
FBgn0031296	CG4415	33279	-3.42021	9.85e-09	Others	Others	Others	Others	Others	Others	Others	Others	Others	Others
FBgn0034468	Obp56a	37264	-3.41916	1.17e-230	Others	Others	Others	Others	Others	Others	Others	Others	Others	Others
FBgn0051371	CG31371	43626	-3.39702	3.47e-137	Others	Others	Others	Others	Others	Others	Others	Others	Others	Others
FBgn0039129	RpS19b	42830	-3.36127	6.53e-05	Others	Others	Others	Others	Others	Others	Others	Others	Others	Others
FBgn0030667	CG15599	32503	-3.35887	4.89e-06	Others	Others	Others	Others	Others	Others	Others	Others	Others	Others
FBgn0035571	CG12493	38575	-3.34048	4.1e-05	Others	Others	Others	Others	Others	Others	Others	Others	Others	Others
FBgn0028852	CG15262	34901	-3.33227	8.45e-06	Others	Others	Others	Others	Others	Others	Others	Others	Others	Others
FBgn0035926	Acbp5	39005	-3.32816	0	Others	Others	Others	Others	Others	Others	Others	Others	Others	Others
FBgn0286788	Orc1	35686	-3.32507	5.93e-60	Others	Others	Others	Others	Others	Others	Others	Others	Others	Others
FBgn0032856	CG16798	35308	-3.32045	1.4e-26	Others	Others	Others	Others	Others	Others	Others	Others	Others	Others
FBgn0051668	CG31668	33395	-3.30992	2.23e-44	Others	Others	Others	Others	Others	Others	Others	Others	Others	Others
FBgn0039795	Spn100A	43642	-3.29783	0	Others	Others	Others	Others	Others	Others	Others	Others	Others	Others
FBgn0030536	CG11068	32357	-3.28119	0.0477392	Others	Others	Others	Others	Others	Others	Others	Others	Others	Others
FBgn0004427	LysD	38127	-3.26006	8.86e-15	Others	Others	Others	Others	Others	Others	Others	Others	Others	Others
FBgn0052106	CG32106	317855	-3.24429	0.000225935	Others	Others	Others	Others	Others	Others	Others	Others	Others	Others
FBgn0040069	vanin-like	31551	-3.243	0	Others	Others	Others	Others	Others	Others	Others	Others	Others	Others
FBgn0035779	CG8562	38828	-3.24133	0	Others	Others	Others	Others	Others	Others	Others	Others	Others	Others
FBgn0030647	CG6324	32481	-3.23634	0.0010847	Others	Others	Others	Others	Others	Others	Others	Others	Others	Others
FBgn0283508	nw	3772015	-3.2278	0	Others	Others	Others	Others	Others	Others	Others	Others	Others	Others
FBgn0030009	CG15336	31742	-3.22083	5.98e-05	Others	Others	Others	Others	Others	Others	Others	Others	Others	Others
FBgn0038608	WRNexo	42208	-3.20892	6.46e-63	Others	Others	Others	Others	Others	Others	Others	Others	Others	Others
FBgn0038723	CG6195	42343	-3.20296	5.63e-158	Mitochondria	Others	Others	Others	Others	Others	Others	Others	Others	Others
FBgn0259998	CG17571	35409	-3.1972	0	Others	Others	Others	Others	Others	Others	Others	Others	Others	Others
FBgn0032997	CG17486	3355138	-3.19293	1.81e-139	Others	Others	Others	Others	Others	Others	Others	Others	Others	Others
FBgn0085231	CG34202	5740498	-3.18065	0	Others	Others	Others	Others	Others	Others	Others	Others	Others	Others
FBgn0030587	CG9522	32413	-3.17952	2.1e-238	Others	Others	Others	Others	Others	Others	Others	Others	Others	Others
FBgn0039852	nyo	43716	-3.17619	2.31e-153	Others	Others	Others	Others	Others	Others	Others	Others	Others	Others
FBgn0038191	CG9925	41702	-3.16791	1.29e-07	Others	Others	Others	Others	Others	Others	Others	Others	Others	Others
FBgn0033268	Obp44a	35789	-3.15915	3.47e-31	Others	Others	Others	Others	Others	Others	Others	Others	Others	Others
FBgn0003382	sha	36213	-3.15687	6.09e-40	Others	Others	Others	Others	Others	Others	Others	Others	Others	Others
FBgn0035056	spz6	37956	-3.13182	0	Others	Others	Others	Others	Others	Others	Others	Others	Others	Others
FBgn0039343	CG5111	43085	-3.12581	0.00132327	Others	Others	Others	Others	Others	Others	Others	Others	Others	Others
FBgn0035552	CG11350	38554	-3.10029	1.14e-118	Others	Others	Others	Others	Others	Others	Others	Others	Others	Others
FBgn0032669	CG15155	35087	-3.0984	3.96e-21	Others	Others	Others	Others	Others	Others	Others	Others	Others	Others
FBgn0039798	CG11313	43646	-3.08273	1.22e-17	Others	Others	Others	Others	Others	Others	Others	Others	Others	Others
FBgn0036350	CG14111	39497	-3.08072	3.25e-89	Others	Others	Others	Others	Others	Others	Others	Others	Others	Others
FBgn0036427	CG4613	39586	-3.07955	2.9e-182	Others	Others	Others	Others	Others	Others	Others	Others	Others	Others
FBgn0039704	neo	43523	-3.07103	0	Others	Others	Others	Others	Others	Others	Others	Others	Others	Others
FBgn0031792	CG13983	33875	-3.06642	1.95e-234	Others	Others	Others	Others	Others	Others	Others	Others	Others	Others
FBgn0034428	AANATL6	37212	-3.06185	6.28e-10	Others	Others	Others	Others	Others	Others	Others	Others	Others	Others
FBgn0037772	Spn85F	41221	-3.05974	7.25e-27	Others	Others	Others	Others	Others	Others	Others	Others	Others	Others
FBgn0021742	C901	32032	-3.0385	1.96e-45	Others	Others	Others	Others	Others	Others	Others	Others	Others	Others
FBgn0263760	CG43677	14462616	-3.01744	7.23e-22	Others	Others	Others	Others	Others	Others	Others	Others	Others	Others
FBgn0265267	CG18258	32708	-3.01279	3.74e-27	Others	Others	Others	Others	Others	Others	Others	Others	Others	Others
FBgn0039591	CG9988	43388	-3.01188	1.01e-143	Others	Others	Others	Others	Others	Others	Others	Others	Others	Others
FBgn0085230	CG34201	5740368	-3.01025	0	Others	Others	Others	Others	Others	Others	Others	Others	Others	Others
FBgn0029752	TrxT	31443	-3.00673	0.0209819	Others	Others	Others	Others	Others	Others	Others	Others	Others	Others
FBgn0052251	Claspin	326205	-2.9959	2.44e-28	Others	Others	Others	Others	Others	Others	Others	Others	Others	Others
FBgn0039801	Npc2h	43649	-2.98221	1.11e-27	Others	Others	Others	Others	Others	Others	Others	Others	Others	Others
FBgn0259149	CG42264	31504	-2.98031	1.48e-89	Others	Others	Others	Others	Others	Others	Others	Others	Others	Others
FBgn0261799	dsx-c73A	39831	-2.97401	8.51e-118	Others	Others	Others	Others	Others	Others	Others	Others	Others	Others
FBgn0029716	CG3546	31389	-2.95828	0	Others	Others	Others	Others	Others	Others	Others	Others	Others	Others
FBgn0037664	CG8420	41097	-2.95554	0	Others	Others	Others	Others	Others	Others	Others	Others	Others	Others
FBgn0002577	m	44835	-2.94852	1.8e-96	Others	Others	Others	Others	Others	Others	Others	Others	Others	Others
FBgn0034545	CG13438	37348	-2.94594	6.07e-211	Others	Others	Others	Others	Others	Others	Others	Others	Others	Others
FBgn0036689	CG7730	39908	-2.94136	3.73e-06	Others	Others	Others	Others	Others	Others	Others	Others	Others	Others
FBgn0038257	smp-30	41786	-2.93363	1.25e-279	Others	Others	Others	Others	Others	Others	Others	Others	Others	Others
FBgn0005655	PCNA	37290	-2.9281	2.37e-207	Mitochondria	Others	Others	Others	Others	Others	Others	Others	Others	Others
FBgn0026314	Ugt35B1	41333	-2.92714	4.6e-05	Others	Others	Others	Others	Others	Others	Others	Others	Others	Others
FBgn0032282	CG7299	34468	-2.92238	0	Others	Others	Others	Others	Others	Others	Others	Others	Others	Others
FBgn0284435	tyn	3354987	-2.92141	0	Others	Others	Others	Others	Others	Others	Others	Others	Others	Others
FBgn0052241	CG32241	317934	-2.92136	2.5e-19	Others	Others	Others	Others	Others	Others	Others	Others	Others	Others
FBgn0037762	eloF	41211	-2.91251	7.79e-13	Others	Others	Others	Others	Others	Others	Others	Others	Others	Others
FBgn0038821	CG17267	42454	-2.90927	5.12e-190	Others	Others	Others	Others	Others	Others	Others	Others	Others	Others
FBgn0028999	nerfin-1	44786	-2.90831	6.41e-12	Others	Others	Others	Others	Others	Others	Others	Others	Others	Others
FBgn0261526	NT1	38558	-2.90778	3.64e-138	Others	Others	Others	Others	Others	Others	Others	Others	Others	Others
FBgn0034427	CG10474	37211	-2.9	7.54e-88	Others	Others	Others	Others	Others	Others	Others	Others	Others	Others
FBgn0031574	TTLL4B	33609	-2.89939	2.02e-06	Others	Others	Others	Others	Others	Others	Others	Others	Others	Others
FBgn0031485	CG9643	33504	-2.89672	5.81e-36	Others	Others	Others	Others	Others	Others	Others	Others	Others	Others
FBgn0037801	CG3999	41253	-2.88743	4.79e-133	Mitochondria	Others	Others	Others	Others	Others	Others	Others	Others	Others
FBgn0030544	CG13403	32366	-2.88191	2.14e-10	Others	Others	Others	Others	Others	Others	Others	Others	Others	Others
FBgn0259676	DNApol-alpha60	44915	-2.87345	5.54e-41	Others	Others	Others	Others	Others	Others	Others	Others	Others	Others
FBgn0017577	Mcm5	41296	-2.8728	1.79e-63	Others	Others	Others	Others	Others	Others	Others	Others	Others	Others
FBgn0034247	CG6484	36994	-2.8628	6.52e-44	Others	Others	Others	Others	Others	Others	Others	Others	Others	Others
FBgn0039193	CG13613	42910	-2.85631	9.75e-12	Others	Others	Others	Others	Others	Others	Others	Others	Others	Others
FBgn0015270	Orc2	41703	-2.85013	1.27e-19	Others	Others	Others	Others	Others	Others	Others	Others	Others	Others
FBgn0035551	CG7465	38553	-2.84425	0	Others	Others	Others	Others	Others	Others	Others	Others	Others	Others
FBgn0035644	DNApol-epsilon58	38661	-2.82927	6.61e-20	Others	Others	Others	Others	Others	Others	Others	Others	Others	Others
FBgn0034462	CG15905	37257	-2.82776	2.91e-27	Others	Others	Others	Others	Others	Others	Others	Others	Others	Others
FBgn0033970	CG10205	36650	-2.82708	0	Others	Others	Others	Others	Others	Others	Others	Others	Others	Others
FBgn0024920	Ts	33499	-2.80619	4.17e-44	Mitochondria	Others	Others	Others	Others	Others	Others	Others	Others	Others
FBgn0265011	Np	35904	-2.7998	6.09e-119	Others	Others	Others	Others	Others	Others	Others	Others	Others	Others
FBgn0038629	CG14304	42232	-2.78904	8.14e-70	Others	Others	Others	Others	Others	Others	Others	Others	Others	Others
FBgn0039052	CG6733	42731	-2.77363	1.9e-221	Others	Others	Others	Others	Others	Others	Others	Others	Others	Others
FBgn0032200	CG5676	34368	-2.77084	2.36e-51	Mitochondria	Others	Others	Others	Others	Others	Others	Others	Others	Others
FBgn0035522	CG1273	38522	-2.77044	1.18e-141	Others	Others	Others	Others	Others	Others	Others	Others	Others	Others
FBgn0038348	AOX2	41895	-2.76762	4.52e-16	Others	Others	Others	Others	Others	Others	Others	Others	Others	Others
FBgn0034614	CG9752	37431	-2.76247	4.4e-42	Others	Others	Others	Others	Others	Others	Others	Others	Others	Others
FBgn0032304	CG17134	34494	-2.75711	0	Others	Others	Others	Others	Others	Others	Others	Others	Others	Others
FBgn0262588	CG43125	12798281	-2.75319	4.89e-18	Others	Others	Others	Others	Others	Others	Others	Others	Others	Others
FBgn0039195	CG17782	42912	-2.75247	5.08e-52	Others	Others	Others	Others	Others	Others	Others	Others	Others	Others
FBgn0038958	CG13857	42627	-2.75194	4.02e-91	Others	Others	Others	Others	Others	Others	Others	Others	Others	Others
FBgn0037502	wa-cup	40892	-2.74563	0.0392389	Others	Others	Others	Others	Others	Others	Others	Others	Others	Others
FBgn0034092	CG7798	36798	-2.74485	0.000270487	Others	Others	Others	Others	Others	Others	Others	Others	Others	Others
FBgn0034710	Alp7	37538	-2.74169	0	Others	Others	Others	Others	Others	Others	Others	Others	Others	Others
FBgn0039784	CG9698	43629	-2.7409	2.3e-88	Others	Others	Others	Others	Others	Others	Others	Others	Others	Others
FBgn0020633	Mcm7	39014	-2.73793	7.78e-25	Others	Others	Others	Others	Others	Others	Others	Others	Others	Others
FBgn0039851	mey	43715	-2.73787	3.9e-110	Others	Others	Others	Others	Others	Others	Others	Others	Others	Others
FBgn0000405	CycB	37618	-2.73323	8.29e-12	Others	Others	Others	Others	Others	Others	Others	Others	Others	Others
FBgn0034884	Eglp3	37738	-2.72973	2.21e-20	Others	Others	Others	Others	Others	Others	Others	Others	Others	Others
FBgn0036767	CG16775	39993	-2.72747	1.99e-94	Others	Others	Others	Others	Others	Others	Others	Others	Others	Others
FBgn0043576	PGRP-SC1a	35859	-2.72465	5.33e-55	Others	Others	Others	Others	Others	Others	Others	Others	Others	Others
FBgn0033297	Mal-A8	35830	-2.72449	1.46e-40	Others	Others	Others	Others	Others	Others	Others	Others	Others	Others
FBgn0033732	CG13157	36355	-2.72238	2.01e-50	Others	Others	Others	Others	Others	Others	Others	Others	Others	Others
FBgn0000116	Argk	39041	-2.70594	0	Mitochondria	Others	Others	Others	Others	Others	Others	Others	Others	Others
FBgn0264395	CG43843	14462411	-2.70568	0.0288557	Others	Others	Others	Others	Others	Others	Others	Others	Others	Others
FBgn0032929	Mcm10	35390	-2.70147	8.95e-24	Others	Others	Others	Others	Others	Others	Others	Others	Others	Others
FBgn0031343	CG18131	33331	-2.69702	0.00132117	Others	Others	Others	Others	Others	Others	Others	Others	Others	Others
FBgn0058191	CG40191	3354930	-2.65519	1.33e-128	Others	Others	Others	Others	Others	Others	Others	Others	Others	Others
FBgn0038613	Vha100-4	42214	-2.65326	1.99e-131	Others	Others	Others	Others	Others	Others	Others	Others	Others	Others
FBgn0085471	CG34442	5740603	-2.64186	0.000700454	Others	Others	Others	Others	Others	Others	Others	Others	Others	Others
FBgn0003089	pip	40104	-2.64139	0	Others	Others	Others	Others	Others	Others	Others	Others	Others	Others
FBgn0085345	CG34316	5740757	-2.63935	8.69e-28	Others	Others	Others	Others	Others	Others	Others	Others	Others	Others
FBgn0001255	ImpE3	48239	-2.63764	9.93e-37	Others	Others	Others	Others	Others	Others	Others	Others	Others	Others
FBgn0053459	CG33459	2768847	-2.62549	5.11e-10	Others	Others	Others	Others	Others	Others	Others	Others	Others	Others
FBgn0039800	Npc2g	43648	-2.62377	1.37e-205	Others	Others	Others	Others	Others	Others	Others	Others	Others	Others
FBgn0264272	mwh	38131	-2.60833	1.84e-99	Others	Others	Others	Others	Others	Others	Others	Others	Others	Others
FBgn0040764	CG13230	50237	-2.60601	2.51e-46	Others	Others	Others	Others	Others	Others	Others	Others	Others	Others
FBgn0053465	CG33465	3885587	-2.59862	6.51e-23	Others	Others	Others	Others	Others	Others	Others	Others	Others	Others
FBgn0035607	CG4835	38619	-2.59585	3.7e-89	Others	Others	Others	Others	Others	Others	Others	Others	Others	Others
FBgn0030162	CG1986	31925	-2.59516	2.02e-06	Others	Others	Others	Others	Others	Others	Others	Others	Others	Others
FBgn0050085	Rif1	246445	-2.59067	1.04e-29	Others	Others	Others	Others	Others	Others	Others	Others	Others	Others
FBgn0265631	CG44438	19834939	-2.59024	0.00107949	Others	Others	Others	Others	Others	Others	Others	Others	Others	Others
FBgn0031091	Phf7	33015	-2.58867	2.95e-35	Others	Others	Others	Others	Others	Others	Others	Others	Others	Others
FBgn0028950	CG15255	34913	-2.58399	4.04e-72	Others	Others	Others	Others	Others	Others	Others	Others	Others	Others
FBgn0032449	CG17036	34679	-2.58289	1.89e-92	Others	Others	Others	Others	Others	Others	Others	Others	Others	Others
FBgn0001090	bnb	32872	-2.5821	1.2e-116	Others	Others	Others	Others	Others	Others	Others	Others	Others	Others
FBgn0267033	mamo	32353	-2.58005	4.34e-54	Others	Others	Others	Others	Others	Others	Others	Others	Others	Others
FBgn0036831	CG6839	40067	-2.57811	0	Others	Others	Others	Others	Others	Others	Others	Others	Others	Others
FBgn0039196	CG17781	42913	-2.57118	5.38e-80	Others	Others	Others	Others	Others	Others	Others	Others	Others	Others
FBgn0264775	CG44013	14462476	-2.56992	2.03e-10	Others	Others	Others	Others	Others	Others	Others	Others	Others	Others
FBgn0035553	CG13722	38555	-2.56897	2.39e-51	Others	Others	Others	Others	Others	Others	Others	Others	Others	Others
FBgn0030148	CG3106	31909	-2.56456	0	Others	Others	Others	Others	Others	Others	Others	Others	Others	Others
FBgn0031688	Cyp28d2	33748	-2.56412	4.82e-66	Others	Others	Others	Others	Others	Others	Others	Others	Others	Others
FBgn0034782	CG12490	37623	-2.55878	1.69e-09	Others	Others	Others	Others	Others	Others	Others	Others	Others	Others
FBgn0260746	Ect3	41457	-2.54795	1.35e-47	Others	Others	Others	Others	Others	Others	Others	Others	Others	Others
FBgn0033742	Nepl10	36366	-2.5454	3.29e-37	Others	Others	Others	Others	Others	Others	Others	Others	Others	Others
FBgn0259113	DNApol-alpha180	42553	-2.5431	1.3e-42	Others	Others	Others	Others	Others	Others	Others	Others	Others	Others
FBgn0037714	CG9396	41156	-2.53502	1.41e-128	Mitochondria	Others	Others	Others	Others	Others	Others	Others	Others	Others
FBgn0032913	CG9259	35372	-2.5346	5.56e-146	Others	Others	Others	Others	Others	Others	Others	Others	Others	Others
FBgn0040352	CG14416	31273	-2.52874	2.78e-05	Others	Others	Others	Others	Others	Others	Others	Others	Others	Others
FBgn0034440	CG10073	37225	-2.52336	1.09e-11	Others	Others	Others	Others	Others	Others	Others	Others	Others	Others
FBgn0040232	cmet	53561	-2.52253	0.00325801	Others	Others	Others	Others	Others	Others	Others	Others	Others	Others
FBgn0085352	CG34323	5740207	-2.51377	0.0340471	Others	Others	Others	Others	Others	Others	Others	Others	Others	Others
FBgn0003545	sub	44870	-2.51297	9.25e-12	Others	Others	Others	Others	Others	Others	Others	Others	Others	Others
FBgn0259978	vlc	46078	-2.50456	3.43e-112	Mitochondria	Others	Others	Others	Others	Others	Others	Others	Others	Others
FBgn0031252	CG13690	33213	-2.50017	5.56e-13	Others	Others	Others	Others	Others	Others	Others	Others	Others	Others
FBgn0051268	CG31268	318652	-2.49966	7.95e-225	Others	Others	Others	Others	Others	Others	Others	Others	Others	Others
FBgn0262003	CG42821	3885579	-2.49671	1.02e-14	Others	Others	Others	Others	Others	Others	Others	Others	Others	Others
FBgn0024227	aurB	34504	-2.48907	8.02e-12	Others	Others	Others	Others	Others	Others	Others	Others	Others	Others
FBgn0033363	CG13744	35906	-2.48749	1.52e-22	Others	Others	Others	Others	Others	Others	Others	Others	Others	Others
FBgn0039324	CG10553	43064	-2.47985	2.67e-43	Others	Others	Others	Others	Others	Others	Others	Others	Others	Others
FBgn0023550	FarO	45707	-2.47504	1.08e-54	Others	Others	Others	Others	Others	Others	Others	Others	Others	Others
FBgn0029754	CG15930	31446	-2.46802	1.92e-07	Others	Others	Others	Others	Others	Others	Others	Others	Others	Others
FBgn0000449	dib	45282	-2.46759	0.00040845	Mitochondria	Others	Others	Others	Others	Others	Others	Others	Others	Others
FBgn0032698	CG10336	35122	-2.46443	6.28e-14	Others	Others	Others	Others	Others	Others	Others	Others	Others	Others
FBgn0036224	Rpt4R	39351	-2.46182	0.00119118	Others	Others	Others	Others	Others	Others	Others	Others	Others	Others
FBgn0037099	CG7173	40392	-2.46085	5.63e-203	Others	Others	Others	Others	Others	Others	Others	Others	Others	Others
FBgn0259209	Mlp60A	37853	-2.46028	7.88e-270	Others	Others	Others	Others	Others	Others	Others	Others	Others	Others
FBgn0011692	pav	38515	-2.45544	1.1e-18	Others	Others	Others	Others	Others	Others	Others	Others	Others	Others
FBgn0263850	CG43711	14462613	-2.45223	4.33e-27	Others	Others	Others	Others	Others	Others	Others	Others	Others	Others
FBgn0033890	Ctf4	36551	-2.45119	1.7e-29	Others	Others	Others	Others	Others	Others	Others	Others	Others	Others
FBgn0032693	Cyp310a1	35115	-2.45068	1.02e-40	Others	Others	Others	Others	Others	Others	Others	Others	Others	Others
FBgn0026190	PH4alphaMP	43624	-2.44933	3.96e-124	Others	Others	Others	Others	Others	Others	Others	Others	Others	Others
FBgn0030107	CG15370	31864	-2.44907	2.67e-77	Others	Others	Others	Others	Others	Others	Others	Others	Others	Others
FBgn0036436	CG4914	39597	-2.44842	2.02e-59	Others	Others	Others	Others	Others	Others	Others	Others	Others	Others
FBgn0004372	aly	45960	-2.44839	0.0368781	Others	Others	Others	Others	Others	Others	Others	Others	Others	Others
FBgn0263109	CG43366	35519	-2.44515	3.71e-286	Others	Others	Others	Others	Others	Others	Others	Others	Others	Others
FBgn0000996	dup	47121	-2.44168	1.67e-68	Others	Others	Others	Others	Others	Others	Others	Others	Others	Others
FBgn0038073	CG14395	41560	-2.44166	1.67e-42	Others	Others	Others	Others	Others	Others	Others	Others	Others	Others
FBgn0004654	Pgd	31185	-2.43902	1.95e-265	Others	Others	Others	Others	Others	Others	Others	Others	Others	Others
FBgn0010258	Rbp4	41668	-2.43788	0.000262184	Others	Others	Others	Others	Others	Others	Others	Others	Others	Others
FBgn0002899	mus301	38905	-2.43582	1.3e-08	Others	Others	Others	Others	Others	Others	Others	Others	Others	Others
FBgn0036833	CG3819	40069	-2.43296	0	Others	Others	Others	Others	Others	Others	Others	Others	Others	Others
FBgn0020236	ATPCL	36760	-2.42372	0	Mitochondria	Others	Others	Others	Others	Others	Others	Others	Others	Others
FBgn0039656	CG11951	43463	-2.41712	1.33e-22	Others	Others	Others	Others	Others	Others	Others	Others	Others	Others
FBgn0046253	CG3502	37695	-2.41405	2.13e-54	Others	Others	Others	Others	Others	Others	Others	Others	Others	Others
FBgn0259986	nab	3346237	-2.40891	6.17e-09	Others	Others	Others	Others	Others	Others	Others	Others	Others	Others
FBgn0037996	CG4830	41477	-2.40095	3.76e-285	Others	Others	Others	Others	Others	Others	Others	Others	Others	Others
FBgn0039873	Smvt	43744	-2.39827	5.74e-118	Others	Others	Others	Others	Others	Others	Others	Others	Others	Others
FBgn0032615	CG6012	35022	-2.39677	1.84e-09	Others	Others	Others	Others	Others	Others	Others	Others	Others	Others
FBgn0050354	UQCR-11L	246560	-2.39601	0.0179665	Mitochondria	Others	Others	Others	Others	ETC	tsETC	Others	Others	Others
FBgn0039407	CG14544	43170	-2.38595	3.64e-13	Others	Others	Others	Others	Others	Others	Others	Others	Others	Others
FBgn0003124	polo	40232	-2.38445	4.33e-34	Others	Others	Others	Others	Others	Others	Others	Others	Others	Others
FBgn0033633	Smyd4-3	36234	-2.37497	6.36e-110	Others	Others	Others	Others	Others	Others	Others	Others	Others	Others
FBgn0266369	Mtp	35362	-2.36545	3.13e-197	Others	Others	Others	Others	Others	Others	Others	Others	Others	Others
FBgn0022338	dnk	42273	-2.35304	2.27e-148	Mitochondria	Others	Others	Others	Others	Others	Others	Others	Others	Others
FBgn0031182	Cyp6t1	33127	-2.35224	0.0165434	Others	Others	Others	Others	Others	Others	Others	Others	Others	Others
FBgn0286508	Had1	32592	-2.35039	5.24e-169	Others	Others	Others	Others	Others	Others	Others	Others	Others	Others
FBgn0039257	tnc	42990	-2.34718	4.99e-274	Others	Others	Others	Others	Others	Others	Others	Others	Others	Others
FBgn0250904	CG34434	31472	-2.34683	0.0042968	Others	Others	Others	Others	Others	Others	Others	Others	Others	Others
FBgn0085298	CG34269	5740713	-2.34335	0.0213909	Others	Others	Others	Others	Others	Others	Others	Others	Others	Others
FBgn0016054	phr6-4	35322	-2.34207	3.02e-09	Mitochondria	Others	Others	Others	Others	Others	Others	Others	Others	Others
FBgn0000592	Est-6	39392	-2.33698	9.34e-85	Others	Others	Others	Others	Others	Others	Others	Others	Others	Others
FBgn0026261	bonsai	37587	-2.32783	1.47e-78	Mitochondria	Others	Others	Others	Translation_mito	Others	Others	Others	Others	Others
FBgn0036678	CG11905	39895	-2.32025	0	Others	Others	Others	Others	Others	Others	Others	Others	Others	Others
FBgn0037913	fabp	3772232	-2.31707	0	Others	Others	Others	Others	Others	Others	Others	Others	Others	Others
FBgn0033292	Cyp4ad1	35821	-2.31067	1.41e-124	Others	Others	Others	Others	Others	Others	Others	Others	Others	Others
FBgn0039192	CG17784	42909	-2.30866	3.59e-16	Others	Others	Others	Others	Others	Others	Others	Others	Others	Others
FBgn0034624	CG17974	37441	-2.30289	4.96e-72	Others	Others	Others	Others	Others	Others	Others	Others	Others	Others
FBgn0029647	CG17959	31288	-2.30244	2.66e-11	Others	Others	Others	Others	Others	Others	Others	Others	Others	Others
FBgn0033274	CG14757	35797	-2.29923	0.0338137	Mitochondria	Others	Others	Others	Others	ETC	Others	Others	TCA	Others
FBgn0039687	Naa40	43500	-2.29864	5.44e-11	Others	Others	Others	Others	Others	Others	Others	Others	Others	Others
FBgn0037763	CG16904	41212	-2.28582	1.27e-74	Others	Others	Others	Others	Others	Others	Others	Others	Others	Others
FBgn0262598	mtsh	34141	-2.28581	0.0158862	Others	Others	Others	Others	Others	Others	Others	Others	Others	Others
FBgn0053124	CG33124	318891	-2.27918	6.82e-22	Others	Others	Others	Others	Others	Others	Others	Others	Others	Others
FBgn0052751	CG32751	318189	-2.27836	2.33e-69	Others	Others	Others	Others	Others	Others	Others	Others	Others	Others
FBgn0286204	ich	41069	-2.26928	3.41e-49	Others	Others	Others	Others	Others	Others	Others	Others	Others	Others
FBgn0033763	CG8646	36394	-2.26921	1.4e-48	Others	Others	Others	Others	Others	Others	Others	Others	Others	Others
FBgn0034411	CG18605	37189	-2.26596	0.000327206	Others	Others	Others	Others	Others	Others	Others	Others	Others	Others
FBgn0020906	Jon25Bi	33708	-2.2574	5.01e-298	Others	Others	Others	Others	Others	Others	Others	Others	Others	Others
FBgn0264832	CG44040	14462475	-2.25546	8.18e-07	Others	Others	Others	Others	Others	Others	Others	Others	Others	Others
FBgn0025700	CG5885	34314	-2.25484	0	Others	Others	Others	Others	Others	Others	Others	Others	Others	Others
FBgn0037205	BoYb	40512	-2.2547	0.0236362	Others	Others	Others	Others	Others	Others	Others	Others	Others	Others
FBgn0261270	Sps1	36587	-2.25133	2.06e-274	Others	Others	Others	Others	Others	Others	Others	Others	Others	Others
FBgn0250839	CG2016	40612	-2.25061	1.82e-162	Others	Others	Others	Others	Others	Others	Others	Others	Others	Others
FBgn0036677	CG13023	39894	-2.24839	0.00791516	Others	Others	Others	Others	Others	Others	Others	Others	Others	Others
FBgn0037879	scpr-C	41348	-2.24807	0.000371501	Others	Others	Others	Others	Others	Others	Others	Others	Others	Others
FBgn0040941	CG15308	50415	-2.2475	1.48e-67	Others	Others	Others	Others	Others	Others	Others	Others	Others	Others
FBgn0020640	Lcp65Ae	45018	-2.24532	2.93e-16	Others	Others	Others	Others	Others	Others	Others	Others	Others	Others
FBgn0053774	CG33774	3772288	-2.24012	5.78e-16	Others	Others	Others	Others	Others	Others	Others	Others	Others	Others
FBgn0263200	Galt	33935	-2.23897	9.27e-69	Others	Others	Others	Others	Others	Others	Others	Others	Others	Others
FBgn0036750	CG6034	39974	-2.23844	0.00524277	Others	Others	Others	Others	Others	Others	Others	Others	Others	Others
FBgn0052198	CG32198	317909	-2.23825	0	Others	Others	Others	Others	Others	Others	Others	Others	Others	Others
FBgn0037589	Obp85a	41006	-2.23509	0.0335635	Others	Others	Others	Others	Others	Others	Others	Others	Others	Others
FBgn0011016	SsRbeta	39768	-2.23114	0	Others	Others	Others	Others	Others	Others	Others	Others	Others	Others
FBgn0038873	CG5892	42522	-2.22111	3.28e-41	Others	Others	Others	Others	Others	Others	Others	Others	Others	Others
FBgn0267967	corolla	32739	-2.21958	0.0101428	Others	Others	Others	Others	Others	Others	Others	Others	Others	Others
FBgn0004003	wbl	37206	-2.21957	7.76e-71	Others	Others	Others	Others	Others	Others	Others	Others	Others	Others
FBgn0001086	fzy	34968	-2.21812	3.89e-08	Others	Others	Others	Others	Others	Others	Others	Others	Others	Others
FBgn0033691	CG8860	36310	-2.21778	1.8e-59	Others	Others	Others	Others	Others	Others	Others	Others	Others	Others
FBgn0031337	CG14346	33325	-2.21748	0.00419673	Others	Others	Others	Others	Others	Others	Others	Others	Others	Others
FBgn0052304	obst-I	317966	-2.21535	0.0304892	Others	Others	Others	Others	Others	Others	Others	Others	Others	Others
FBgn0052667	ssp7	318146	-2.21329	4.68e-21	Others	Others	Others	Others	Others	Others	Others	Others	Others	Others
FBgn0039752	CG15530	43589	-2.21014	0.0173348	Others	Others	Others	Others	Others	Others	Others	Others	Others	Others
FBgn0030692	mRpS30	32530	-2.20641	2.58e-228	Mitochondria	Others	Others	Others	Translation_mito	Others	Others	Others	Others	Others
FBgn0001112	Gld	40875	-2.20571	1.25e-220	Others	Others	Others	Others	Others	Others	Others	Others	Others	Others
FBgn0037782	Npc2d	41232	-2.2056	1.65e-39	Others	Others	Others	Others	Others	Others	Others	Others	Others	Others
FBgn0038886	Ugt49B2	42538	-2.20431	4.18e-20	Others	Others	Others	Others	Others	Others	Others	Others	Others	Others
FBgn0039197	CG17780	42914	-2.1997	5.24e-43	Others	Others	Others	Others	Others	Others	Others	Others	Others	Others
FBgn0034292	CG5767	37055	-2.19501	4.65e-224	Others	Others	Others	Others	Others	Others	Others	Others	Others	Others
FBgn0050289	CG30289	246532	-2.19363	6.05e-08	Others	Others	Others	Others	Others	Others	Others	Others	Others	Others
FBgn0000150	awd	43739	-2.19146	0	Mitochondria	Others	Others	Others	Others	Others	Others	Others	Others	Others
FBgn0031049	Sec61gamma	32968	-2.18894	3.94e-168	Others	Others	Others	Others	Others	Others	Others	Others	Others	Others
FBgn0020389	Papss	40167	-2.18847	9.39e-218	Others	Others	Others	Others	Others	Others	Others	Others	Others	Others
FBgn0011227	ox	45401	-2.18159	9.64e-42	Mitochondria	Others	Others	Others	Others	ETC	Others	Others	Others	Others
FBgn0286786	hoip	44173	-2.17989	5.07e-100	Others	Others	Others	Others	Others	Others	Others	Others	Others	Others
FBgn0038181	CG9297	41688	-2.17786	0	Others	Others	Others	Others	Others	Others	Others	Others	Others	Others
FBgn0053129	CG33129	34514	-2.17504	0	Others	Others	Others	Others	Others	Others	Others	Others	Others	Others
FBgn0035121	Tudor-SN	38045	-2.17325	0	Mitochondria	Others	Others	Others	Others	Others	Others	Others	Others	Others
FBgn0011703	RnrL	34392	-2.17118	7.87e-144	Others	Others	Others	Others	Others	Others	Others	Others	Others	Others
FBgn0030968	CG7322	32880	-2.16711	2.37e-111	Others	Others	Others	Others	Others	Others	Others	Others	Others	Others
FBgn0032015	Ostgamma	34137	-2.16686	6.71e-249	Others	Others	Others	Others	Others	Others	Others	Others	Others	Others
FBgn0036225	CG5883	39352	-2.15309	1.7e-71	Others	Others	Others	Others	Others	Others	Others	Others	Others	Others
FBgn0036707	CG13724	39927	-2.14758	0.00852724	Others	Others	Others	Others	Others	Others	Others	Others	Others	Others
FBgn0031908	CG5177	34017	-2.14743	0	Others	Others	Others	Others	Others	Others	Others	Others	Others	Others
FBgn0034548	CG13443	37351	-2.14603	9.36e-171	Others	Others	Others	Others	Others	Others	Others	Others	Others	Others
FBgn0039198	CG5768	42915	-2.14217	9.78e-12	Others	Others	Others	Others	Others	Others	Others	Others	Others	Others
FBgn0051755	SoYb	34331	-2.14149	0.0360775	Others	Others	Others	Others	Others	Others	Others	Others	Others	Others
FBgn0038426	mRpS33	41991	-2.13688	2.44e-25	Mitochondria	Others	Others	Others	Translation_mito	Others	Others	Others	Others	Others
FBgn0035781	CG8560	38830	-2.13671	5.89e-261	Others	Others	Others	Others	Others	Others	Others	Others	Others	Others
FBgn0011787	mRpL12	44326	-2.13452	6.71e-81	Mitochondria	Others	Transcription_mito	RNA_metabolism_mito	Translation_mito	Others	Others	Others	Others	Others
FBgn0015926	dah	32459	-2.13164	2.84e-05	Others	Others	Others	Others	Others	Others	Others	Others	Others	Others
FBgn0034217	Lhr	36957	-2.13072	0.000135108	Others	Others	Others	Others	Others	Others	Others	Others	Others	Others
FBgn0040290	RecQ4	53438	-2.12781	1.09e-45	Others	Others	Others	Others	Others	Others	Others	Others	Others	Others
FBgn0038519	Prx3	42109	-2.12456	5.89e-209	Mitochondria	Others	Others	Others	Others	Others	Others	Others	Others	Others
FBgn0085307	CG34278	5740656	-2.12443	9.73e-05	Others	Others	Others	Others	Others	Others	Others	Others	Others	Others
FBgn0029646	CG14423	31287	-2.12338	1.01e-146	Others	Others	Others	Others	Others	Others	Others	Others	Others	Others
FBgn0039184	CG6432	42901	-2.12201	2.79e-70	Others	Others	Others	Others	Others	Others	Others	Others	Others	Others
FBgn0032839	AANATL3	35285	-2.12122	0.00125055	Others	Others	Others	Others	Others	Others	Others	Others	Others	Others
FBgn0031070	CG12702	32993	-2.11969	0.00122745	Others	Others	Others	Others	Others	Others	Others	Others	Others	Others
FBgn0086357	Sec61alpha	33905	-2.11203	0	Others	Others	Others	Others	Others	Others	Others	Others	Others	Others
FBgn0284244	l(2)k05911	34731	-2.11042	9.82e-126	Others	Others	Others	Others	Others	Others	Others	Others	Others	Others
FBgn0052354	CG32354	50302	-2.10887	4.98e-30	Others	Others	Others	Others	Others	Others	Others	Others	Others	Others
FBgn0030073	CG10962	31824	-2.10712	0	Others	Others	Others	Others	Others	Others	Others	Others	Others	Others
FBgn0054003	NimB3	3885611	-2.10487	4.8e-10	Others	Others	Others	Others	Others	Others	Others	Others	Others	Others
FBgn0063670	CG40228	5740664	-2.10483	7.41e-17	Others	Others	Others	Others	Others	Others	Others	Others	Others	Others
FBgn0063495	GstE5	37110	-2.09889	1.05e-53	Others	Others	Others	Others	Others	Others	Others	Others	Others	Others
FBgn0030914	CG6106	32816	-2.09738	4.01e-15	Others	Others	Others	Others	Others	Others	Others	Others	Others	Others
FBgn0260226	CG42500	50032	-2.09607	0.0453463	Others	Others	Others	Others	Others	Others	Others	Others	Others	Others
FBgn0029639	CG14419	31276	-2.09418	1.25e-79	Others	Others	Others	Others	Others	Others	Others	Others	Others	Others
FBgn0051380	CG31380	318701	-2.09339	0.000418583	Others	Others	Others	Others	Others	Others	Others	Others	Others	Others
FBgn0083978	CG17672	4379911	-2.09241	7.71e-244	Others	Others	Others	Others	Others	Others	Others	Others	Others	Others
FBgn0044511	mRpS21	318249	-2.09131	2.9e-06	Mitochondria	Others	Others	Others	Translation_mito	Others	Others	Others	Others	Others
FBgn0262004	CG42822	10178916	-2.09034	4.76e-12	Others	Others	Others	Others	Others	Others	Others	Others	Others	Others
FBgn0286818	Pdi	39651	-2.08585	0	Others	Others	Others	Others	Others	Others	Others	Others	Others	Others
FBgn0260458	PGRP-LD	3771920	-2.08413	0.0108811	Others	Others	Others	Others	Others	Others	Others	Others	Others	Others
FBgn0000047	Act88F	41885	-2.0838	0.000997908	Others	Others	Others	Others	Others	Others	Others	Others	Others	Others
FBgn0038247	Cad88C	41774	-2.08041	2.62e-10	Others	Others	Others	Others	Others	Others	Others	Others	Others	Others
FBgn0002563	Lsp1beta	33274	-2.07912	2.21e-06	Others	Others	Others	Others	Others	Others	Others	Others	Others	Others
FBgn0085456	CG34427	5740165	-2.07842	4.64e-53	Others	Others	Others	Others	Others	Others	Others	Others	Others	Others
FBgn0036208	CG10361	39333	-2.07504	1.17e-51	Mitochondria	Others	Others	Others	Others	Others	Others	Others	Others	Others
FBgn0039777	Jon99Fii	43621	-2.07175	0	Others	Others	Others	Others	Others	Others	Others	Others	Others	Others
FBgn0004057	Zw	32974	-2.07108	2.25e-143	Others	Others	Others	Others	Others	Others	Others	Others	Others	Others
FBgn0034500	CG11200	37301	-2.06828	2.4e-231	Others	Others	Others	Others	Others	Others	Others	Others	Others	Others
FBgn0034998	CG13577	37885	-2.06234	0.0266139	Others	Others	Others	Others	Others	Others	Others	Others	Others	Others
FBgn0035727	CG10063	38764	-2.06221	0.000839753	Others	Others	Others	Others	Others	Others	Others	Others	Others	Others
FBgn0087002	apolpp	43827	-2.05979	0	Others	Others	Others	Others	Others	Others	Others	Others	Others	Others
FBgn0015376	cutlet	44637	-2.058	6.72e-26	Others	Others	Others	Others	Others	Others	Others	Others	Others	Others
FBgn0262115	CG17683	3355011	-2.05178	6.99e-121	Others	Others	Others	Others	Others	Others	Others	Others	Others	Others
FBgn0032198	eEF1delta	34363	-2.05061	9.16e-299	Others	Others	Others	Others	Others	Others	Others	Others	Others	Others
FBgn0039145	CG6000	42851	-2.04934	4.28e-26	Mitochondria	Others	Others	Others	Others	Others	Others	Others	Others	Others
FBgn0010638	Sec61beta	46080	-2.04654	4.2e-225	Others	Others	Others	Others	Others	Others	Others	Others	Others	Others
FBgn0034670	CG13488	37496	-2.04338	0.00179265	Others	Others	Others	Others	Others	Others	Others	Others	Others	Others
FBgn0031887	Ugt307A1	33993	-2.04315	0.00135116	Others	Others	Others	Others	Others	Others	Others	Others	Others	Others
FBgn0032236	mRpS7	34412	-2.04092	8.31e-79	Mitochondria	Others	Others	Others	Translation_mito	Others	Others	Others	Others	Others
FBgn0283442	vas	26067080	-2.04074	1.74e-06	Others	Others	Others	Others	Others	Others	Others	Others	Others	Others
FBgn0266492	SclB	19834948	-2.03765	1.66e-157	Others	Others	Others	Others	Others	Others	Others	Others	Others	Others
FBgn0038535	alt	42127	-2.0376	4.35e-231	Others	Others	Others	Others	Others	Others	Others	Others	Others	Others
FBgn0028327	l(1)G0320	326234	-2.03358	0	Others	Others	Others	Others	Others	Others	Others	Others	Others	Others
FBgn0037742	Rpt3R	41190	-2.03068	1.85e-06	Others	Others	Others	Others	Others	Others	Others	Others	Others	Others
FBgn0000473	Cyp6a2	35587	-2.02775	3.72e-29	Others	Others	Others	Others	Others	Others	Others	Others	Others	Others
FBgn0000426	SmF	36314	-2.02251	1.88e-30	Others	Others	Others	Others	Others	Others	Others	Others	Others	Others
FBgn0040005	CG17883	3355139	-2.01644	3.14e-45	Others	Others	Others	Others	Others	Others	Others	Others	Others	Others
FBgn0022355	Tsf1	32821	-2.00349	2.87e-195	Others	Others	Others	Others	Others	Others	Others	Others	Others	Others
FBgn0040308	Jafrac2	53577	-2.00345	1.72e-107	Others	Others	Others	Others	Others	Others	Others	Others	Others	Others
FBgn0265191	Gyg	37419	-2.00206	1.2e-71	Others	Others	Others	Others	Others	Others	Others	Others	Others	Others
FBgn0037992	CG4702	41472	-1.99814	2.98e-266	Others	Others	Others	Others	Others	Others	Others	Others	Others	Others
FBgn0038676	CG6026	42287	-1.99654	2.51e-94	Others	Others	Others	Others	Others	Others	Others	Others	Others	Others
FBgn0010423	TpnC47D	36195	-1.988	0	Others	Others	Others	Others	Others	Others	Others	Others	Others	Others
FBgn0022774	Oat	40145	-1.98718	1.11e-162	Mitochondria	Others	Others	Others	Others	Others	Others	Others	Others	Others
FBgn0033069	eIF3f2	35547	-1.98675	0.018273	Others	Others	Others	Others	Others	Others	Others	Others	Others	Others
FBgn0010053	Jheh1	251984	-1.98385	7.79e-170	Others	Others	Others	Others	Others	Others	Others	Others	Others	Others
FBgn0035343	CG16762	38310	-1.98297	4.3e-96	Others	Others	Others	Others	Others	Others	Others	Others	Others	Others
FBgn0001253	ImpE1	45879	-1.98092	5.86e-184	Others	Others	Others	Others	Others	Others	Others	Others	Others	Others
FBgn0032350	CG6287	34554	-1.98087	1.82e-109	Others	Others	Others	Others	Others	Others	Others	Others	Others	Others
FBgn0011762	DNApol-alpha50	38942	-1.97871	3.17e-19	Others	Others	Others	Others	Others	Others	Others	Others	Others	Others
FBgn0004379	Klp67A	39068	-1.9776	1.18e-07	Others	Others	Others	Others	Others	Others	Others	Others	Others	Others
FBgn0019952	Orct	42891	-1.97528	1.73e-135	Mitochondria	Others	Others	Others	Others	Others	Others	Others	Others	Others
FBgn0032612	CG13282	35019	-1.97523	6.2e-16	Others	Others	Others	Others	Others	Others	Others	Others	Others	Others
FBgn0032144	CG17633	34297	-1.96957	2.21e-252	Others	Others	Others	Others	Others	Others	Others	Others	Others	Others
FBgn0032244	RfC3	34423	-1.96865	9.35e-19	Others	Others	Others	Others	Others	Others	Others	Others	Others	Others
FBgn0051233	CG31233	42557	-1.96843	1.63e-266	Others	Others	Others	Others	Others	Others	Others	Others	Others	Others
FBgn0031357	mRpL48	33348	-1.96309	3.48e-69	Mitochondria	Others	Others	Others	Translation_mito	Others	Others	Others	Others	Others
FBgn0038701	CG18493	42319	-1.9626	6.37e-303	Others	Others	Others	Others	Others	Others	Others	Others	Others	Others
FBgn0054001	CG34001	3885640	-1.95733	2.73e-07	Others	Others	Others	Others	Others	Others	Others	Others	Others	Others
FBgn0263236	SP1029	53473	-1.95618	1.7e-270	Others	Others	Others	Others	Others	Others	Others	Others	Others	Others
FBgn0030027	CG1632	31763	-1.9552	9.04e-52	Others	Others	Others	Others	Others	Others	Others	Others	Others	Others
FBgn0046878	Obp83cd	40746	-1.95451	3.53e-75	Others	Others	Others	Others	Others	Others	Others	Others	Others	Others
FBgn0039486	CAH9	43264	-1.95342	1.04e-140	Others	Others	Others	Others	Others	Others	Others	Others	Others	Others
FBgn0035666	Jon65Aii	38684	-1.9516	8.47e-304	Others	Others	Others	Others	Others	Others	Others	Others	Others	Others
FBgn0050272	MFS1	246519	-1.94774	8.44e-55	Others	Others	Others	Others	Others	Others	Others	Others	Others	Others
FBgn0086368	tw	31024	-1.94736	1.12e-106	Others	Others	Others	Others	Others	Others	Others	Others	Others	Others
FBgn0031392	AIF	33390	-1.94595	2.57e-77	Mitochondria	Others	Others	Others	Others	Others	Others	Protein_import_insertion_mito	Others	Others
FBgn0037764	CG9459	41213	-1.94358	3.01e-06	Others	Others	Others	Others	Others	Others	Others	Others	Others	Others
FBgn0053003	CG33003	318826	-1.94264	1.28e-33	Others	Others	Others	Others	Others	Others	Others	Others	Others	Others
FBgn0031878	sip2	33979	-1.94174	7.77e-14	Others	Others	Others	Others	Others	Others	Others	Others	Others	Others
FBgn0051087	CG31087	43062	-1.93748	2.84e-100	Others	Others	Others	Others	Others	Others	Others	Others	Others	Others
FBgn0038678	mRpL55	42290	-1.93492	1.57e-15	Mitochondria	Others	Others	Others	Translation_mito	Others	Others	Others	Others	Others
FBgn0033089	CG17266	35571	-1.93453	5.39e-18	Others	Others	Others	Others	Others	Others	Others	Others	Others	Others
FBgn0011834	Ser6	33073	-1.93344	3.23e-45	Others	Others	Others	Others	Others	Others	Others	Others	Others	Others
FBgn0029079	icln	36997	-1.93247	2.6e-46	Others	Others	Others	Others	Others	Others	Others	Others	Others	Others
FBgn0001218	Hsc70-3	32133	-1.93235	0	Mitochondria	Others	Others	Others	Others	Others	Others	Others	Others	Others
FBgn0032287	CG6415	34474	-1.9289	8.52e-119	Mitochondria	Others	Others	Others	Others	Others	Others	Others	Others	Others
FBgn0035751	CG14829	38792	-1.92884	2.41e-05	Others	Others	Others	Others	Others	Others	Others	Others	Others	Others
FBgn0032538	Vajk2	34811	-1.92881	0	Others	Others	Others	Others	Others	Others	Others	Others	Others	Others
FBgn0032105	borr	34245	-1.92705	3.03e-10	Others	Others	Others	Others	Others	Others	Others	Others	Others	Others
FBgn0034723	CG13506	37556	-1.92408	1.77e-94	Others	Others	Others	Others	Others	Others	Others	Others	Others	Others
FBgn0003257	r-l	42493	-1.92261	2.8e-153	Others	Others	Others	Others	Others	Others	Others	Others	Others	Others
FBgn0050008	CG30008	246388	-1.92169	2.88e-16	Others	Others	Others	Others	Others	Others	Others	Others	Others	Others
FBgn0035582	CG13705	38587	-1.92102	0	Others	Others	Others	Others	Others	Others	Others	Others	Others	Others
FBgn0039827	CG1544	43689	-1.91996	1.31e-60	Mitochondria	Others	Others	Others	Others	Others	Others	Others	TCA	Others
FBgn0020907	Scp2	42015	-1.91458	8.41e-57	Others	Others	Others	Others	Others	Others	Others	Others	Others	Others
FBgn0033327	PGRP-SC1b	35861	-1.91261	9.8e-09	Others	Others	Others	Others	Others	Others	Others	Others	Others	Others
FBgn0033093	CG3270	35575	-1.90948	2.59e-81	Mitochondria	Others	Others	Others	Others	Others	Others	Others	Others	Others
FBgn0021944	Coprox	44701	-1.90852	9.24e-91	Mitochondria	Others	Others	Others	Others	Others	Others	Others	Others	Heme_metabolism
FBgn0030494	Cpr12A	32309	-1.9075	4.39e-21	Others	Others	Others	Others	Others	Others	Others	Others	Others	Others
FBgn0034277	OstDelta	37029	-1.90548	0	Others	Others	Others	Others	Others	Others	Others	Others	Others	Others
FBgn0051950	Sbat	319043	-1.904	3.84e-10	Others	Others	Others	Others	Others	Others	Others	Others	Others	Others
FBgn0051248	CG31248	40853	-1.90284	8.04e-14	Others	Others	Others	Others	Others	Others	Others	Others	Others	Others
FBgn0263742	CG43667	14462615	-1.90129	2.66e-108	Others	Others	Others	Others	Others	Others	Others	Others	Others	Others
FBgn0032397	Tom70	34618	-1.90064	1.38e-194	Mitochondria	Others	Others	Others	Others	Others	Others	Protein_import_insertion_mito	Others	Others
FBgn0003401	shu	45360	-1.9005	0.00229711	Others	Others	Others	Others	Others	Others	Others	Others	Others	Others
FBgn0053341	CG33341	2768683	-1.9001	0.00113661	Others	Others	Others	Others	Others	Others	Others	Others	Others	Others
FBgn0034733	CG4752	37569	-1.89938	4.93e-63	Others	Others	Others	Others	Others	Others	Others	Others	Others	Others
FBgn0263911	COX8	40390	-1.89886	1.73e-180	Mitochondria	Others	Others	Others	Others	ETC	Others	Others	Others	Others
FBgn0085475	CG34446	5740549	-1.89877	9.62e-13	Others	Others	Others	Others	Others	Others	Others	Others	Others	Others
FBgn0260986	mei-38	31104	-1.89239	1.63e-05	Others	Others	Others	Others	Others	Others	Others	Others	Others	Others
FBgn0035675	CG6610	38693	-1.89219	7.68e-08	Others	Others	Others	Others	Others	Others	Others	Others	Others	Others
FBgn0284442	Mcm3	31449	-1.89212	3.45e-47	Others	Others	Others	Others	Others	Others	Others	Others	Others	Others
FBgn0039030	CG6660	42708	-1.8919	2.04e-55	Others	Others	Others	Others	Others	Others	Others	Others	Others	Others
FBgn0030362	regucalcin	32165	-1.88779	0	Others	Others	Others	Others	Others	Others	Others	Others	Others	Others
FBgn0083167	Neb-cGP	50417	-1.88529	1.72e-225	Mitochondria	Others	Others	Others	Others	ETC	Others	Others	Others	Others
FBgn0034629	Acox57D-d	37446	-1.88366	2.45e-67	Others	Others	Others	Others	Others	Others	Others	Others	Others	Others
FBgn0039175	beta-PheRS	42888	-1.88299	1.44e-118	Others	Others	Others	Others	Others	Others	Others	Others	Others	Others
FBgn0039379	CG5886	43125	-1.88213	1.42e-55	Others	Others	Others	Others	Others	Others	Others	Others	Others	Others
FBgn0034406	Jheh3	37182	-1.87833	7.61e-206	Others	Others	Others	Others	Others	Others	Others	Others	Others	Others
FBgn0010382	CycE	34924	-1.87818	1.75e-16	Others	Others	Others	Others	Others	Others	Others	Others	Others	Others
FBgn0010100	mAcon1	44149	-1.87695	3.71e-285	Mitochondria	Others	Others	Others	Others	Others	Others	Others	TCA	Others
FBgn0031419	CG15390	33422	-1.87642	1.73e-09	Mitochondria	Others	Transcription_mito	RNA_metabolism_mito	Translation_mito	Others	Others	Others	Others	Others
FBgn0033608	CG13220	36200	-1.87468	1.82e-182	Others	Others	Others	Others	Others	Others	Others	Others	Others	Others
FBgn0259238	CG42336	36205	-1.8732	3.05e-127	Others	Others	Others	Others	Others	Others	Others	Others	Others	Others
FBgn0000046	Act87E	48632	-1.87217	5.17e-228	Others	Others	Others	Others	Others	Others	Others	Others	Others	Others
FBgn0028648	mRpL50	38796	-1.86942	6.88e-38	Mitochondria	Others	Others	Others	Translation_mito	Others	Others	Others	Others	Others
FBgn0036710	CG6479	39930	-1.86533	4.44e-66	Others	Others	Others	Others	Others	Others	Others	Others	Others	Others
FBgn0265177	CG44242	19836175	-1.86524	1.01e-48	Mitochondria	Others	Others	Others	Others	Others	Others	Others	Others	Others
FBgn0032442	Nepl7	34671	-1.86458	7.96e-26	Others	Others	Others	Others	Others	Others	Others	Others	Others	Others
FBgn0023549	Mct1	31198	-1.86347	0.00161941	Others	Others	Others	Others	Others	Others	Others	Others	Others	Others
FBgn0038508	CG5866	42097	-1.86259	0.0328956	Others	Others	Others	Others	Others	Others	Others	Others	Others	Others
FBgn0033961	ND-B15	36640	-1.86231	7.18e-39	Mitochondria	Others	Others	Others	Others	ETC	Others	Others	Others	Others
FBgn0043783	CG32444	40406	-1.86026	4.13e-33	Others	Others	Others	Others	Others	Others	Others	Others	Others	Others
FBgn0015929	dpa	35679	-1.85852	3.29e-45	Others	Others	Others	Others	Others	Others	Others	Others	Others	Others
FBgn0038674	CG14285	42281	-1.8575	3.92e-105	Others	Others	Others	Others	Others	Others	Others	Others	Others	Others
FBgn0026741	mRpL18	36406	-1.85567	5.35e-59	Mitochondria	Others	Others	Others	Translation_mito	Others	Others	Others	Others	Others
FBgn0032414	CG17211	34639	-1.85367	3.02e-19	Others	Others	Others	Others	Others	Others	Others	Others	Others	Others
FBgn0015031	cype	46040	-1.85322	1.39e-126	Mitochondria	Others	Others	Others	Others	ETC	Others	Others	Others	Others
FBgn0030507	CG11164	32323	-1.85203	1.8e-09	Others	Others	Others	Others	Others	Others	Others	Others	Others	Others
FBgn0262599	SmydA-3	34502	-1.85155	1.93e-68	Others	Others	Others	Others	Others	Others	Others	Others	Others	Others
FBgn0020392	Nmt	38909	-1.8441	1.07e-118	Others	Others	Others	Others	Others	Others	Others	Others	Others	Others
FBgn0030746	CG9981	32609	-1.84358	4.9e-39	Others	Others	Others	Others	Others	Others	Others	Others	Others	Others
FBgn0033208	mRpL52	35711	-1.84351	6.35e-35	Mitochondria	Others	Others	Others	Translation_mito	Others	Others	Others	Others	Others
FBgn0014391	sun	44046	-1.84254	5.91e-75	Mitochondria	Others	Others	Others	Others	ETC	Others	Others	Others	Others
FBgn0034497	Mpcp1	37297	-1.842	3.39e-185	Mitochondria	Others	Others	Others	Others	Others	Others	Others	Others	Others
FBgn0038307	mRpS10	41838	-1.84139	1.99e-54	Mitochondria	Others	Others	Others	Translation_mito	Others	Others	Others	Others	Others
FBgn0034221	CG10764	36962	-1.83868	2.57e-14	Others	Others	Others	Others	Others	Others	Others	Others	Others	Others
FBgn0037440	CRAT	40787	-1.83541	2.66e-91	Mitochondria	Others	Others	Others	Others	Others	Others	Others	Others	Others
FBgn0000044	Act57B	37368	-1.83477	0	Others	Others	Others	Others	Others	Others	Others	Others	Others	Others
FBgn0086673	CG13272	35013	-1.83413	6.47e-71	Others	Others	Others	Others	Others	Others	Others	Others	Others	Others
FBgn0040832	CG8012	50305	-1.83262	9.91e-30	Others	Others	Others	Others	Others	Others	Others	Others	Others	Others
FBgn0032773	fon	35211	-1.83221	3.76e-254	Others	Others	Others	Others	Others	Others	Others	Others	Others	Others
FBgn0261514	NimA	318930	-1.82991	0.0204818	Others	Others	Others	Others	Others	Others	Others	Others	Others	Others
FBgn0039154	Npc2f	42864	-1.82937	1.3e-55	Others	Others	Others	Others	Others	Others	Others	Others	Others	Others
FBgn0086254	Akr1B	39304	-1.8289	0	Mitochondria	Others	Others	Others	Others	Others	Others	Others	Others	Others
FBgn0032453	CG6180	34683	-1.82863	2.16e-117	Others	Others	Others	Others	Others	Others	Others	Others	Others	Others
FBgn0267976	Tim23	3355096	-1.82768	4.13e-156	Mitochondria	Others	Others	Others	Others	Others	Others	Protein_import_insertion_mito	Others	Others
FBgn0031231	mRpL10	33182	-1.81938	1.61e-67	Mitochondria	Others	Others	Others	Translation_mito	Others	Others	Others	Others	Others
FBgn0030306	Spase25	32095	-1.81925	5.67e-76	Others	Others	Others	Others	Others	Others	Others	Others	Others	Others
FBgn0014075	Uggt	40055	-1.81902	2.46e-81	Others	Others	Others	Others	Others	Others	Others	Others	Others	Others
FBgn0024177	zpg	251414	-1.818	0.0443868	Others	Others	Others	Others	Others	Others	Others	Others	Others	Others
FBgn0032217	CG4972	34388	-1.81714	5.58e-121	Others	Others	Others	Others	Others	Others	Others	Others	Others	Others
FBgn0053460	CG33460	3885588	-1.81701	3.06e-08	Others	Others	Others	Others	Others	Others	Others	Others	Others	Others
FBgn0001256	ImpL1	39499	-1.81588	0	Others	Others	Others	Others	Others	Others	Others	Others	Others	Others
FBgn0036667	kud	39882	-1.81554	1.79e-12	Others	Others	Others	Others	Others	Others	Others	Others	Others	Others
FBgn0002535	Lcp4	35820	-1.81486	7.72e-74	Others	Others	Others	Others	Others	Others	Others	Others	Others	Others
FBgn0014368	nol	64867	-1.81385	3.83e-249	Others	Others	Others	Others	Others	Others	Others	Others	Others	Others
FBgn0040931	CG9034	50405	-1.81264	4.12e-36	Others	Others	Others	Others	Others	Others	Others	Others	Others	Others
FBgn0039897	CG1674	43780	-1.8118	1.23e-289	Others	Others	Others	Others	Others	Others	Others	Others	Others	Others
FBgn0040493	grsm	41587	-1.81105	3.17e-109	Others	Others	Others	Others	Others	Others	Others	Others	Others	Others
FBgn0031501	CG17261	33522	-1.80811	0.0010104	Others	Others	Others	Others	Others	Others	Others	Others	Others	Others
FBgn0032514	CG9302	34750	-1.808	5.13e-144	Others	Others	Others	Others	Others	Others	Others	Others	Others	Others
FBgn0029827	CG6048	31528	-1.80779	1.34e-23	Others	Others	Others	Others	Others	Others	Others	Others	Others	Others
FBgn0027615	OXA1L	39222	-1.80704	4.97e-40	Mitochondria	Others	Others	Others	Others	Others	Others	Protein_import_insertion_mito	Others	Others
FBgn0038234	mRpL11	41757	-1.80632	4.16e-16	Mitochondria	Others	Others	Others	Translation_mito	Others	Others	Others	Others	Others
FBgn0034142	CG8306	36857	-1.80573	0	Others	Others	Others	Others	Others	Others	Others	Others	Others	Others
FBgn0040964	CG18661	50438	-1.80534	1.54e-05	Others	Others	Others	Others	Others	Others	Others	Others	Others	Others
FBgn0039200	CG13616	42917	-1.8042	8.94e-17	Others	Others	Others	Others	Others	Others	Others	Others	Others	Others
FBgn0037607	CG8036	41027	-1.80134	0	Others	Others	Others	Others	Others	Others	Others	Others	Others	Others
FBgn0002466	sti	39429	-1.80067	0.000576104	Others	Others	Others	Others	Others	Others	Others	Others	Others	Others
FBgn0033246	ACC	35761	-1.79441	0	Mitochondria	Others	Others	Others	Others	Others	Others	Others	Others	Others
FBgn0035931	CG13312	39010	-1.79373	7.16e-11	Others	Others	Others	Others	Others	Others	Others	Others	Others	Others
FBgn0030054	Caf1-180	31801	-1.79286	1.66e-19	Others	Others	Others	Others	Others	Others	Others	Others	Others	Others
FBgn0014861	Mcm2	40973	-1.79088	9.2e-40	Others	Others	Others	Others	Others	Others	Others	Others	Others	Others
FBgn0066084	RpL41	251466	-1.7883	2.85e-104	Others	Others	Others	Others	Others	Others	Others	Others	Others	Others
FBgn0010482	l(2)01289	46017	-1.78665	1.66e-163	Others	Others	Others	Others	Others	Others	Others	Others	Others	Others
FBgn0263852	Dad1	34159	-1.78325	1.83e-38	Others	Others	Others	Others	Others	Others	Others	Others	Others	Others
FBgn0010612	ATPsynG	46069	-1.78053	2.48e-181	Mitochondria	Others	Others	Others	Others	ETC	Others	Others	Others	Others
FBgn0034294	Muc55B	37057	-1.78013	2.36e-151	Others	Others	Others	Others	Others	Others	Others	Others	Others	Others
FBgn0000140	asp	42946	-1.77991	1.59e-07	Others	Others	Others	Others	Others	Others	Others	Others	Others	Others
FBgn0013269	Fkbp39	41860	-1.7796	5.41e-211	Others	Others	Others	Others	Others	Others	Others	Others	Others	Others
FBgn0032261	CG6094	34446	-1.77945	1.51e-54	Mitochondria	Others	Others	Others	Translation_mito	Others	Others	Others	Others	Others
FBgn0042137	CG18814	59175	-1.77657	1.73e-09	Others	Others	Others	Others	Others	Others	Others	Others	Others	Others
FBgn0259230	lectin-22C	7354375	-1.77578	8.67e-75	Others	Others	Others	Others	Others	Others	Others	Others	Others	Others
FBgn0011704	RnrS	36280	-1.77439	1.67e-68	Others	Others	Others	Others	Others	Others	Others	Others	Others	Others
FBgn0040907	mRpL33	50381	-1.77227	1.86e-05	Mitochondria	Others	Others	Others	Translation_mito	Others	Others	Others	Others	Others
FBgn0034662	CG13492	37487	-1.77091	1.79e-152	Others	Others	Others	Others	Others	Others	Others	Others	Others	Others
FBgn0036489	CG7011	39657	-1.76893	5.97e-29	Others	Others	Others	Others	Others	Others	Others	Others	Others	Others
FBgn0014879	Set	41844	-1.76754	1.85e-47	Others	Others	Others	Others	Others	Others	Others	Others	Others	Others
FBgn0034838	CG12782	37685	-1.76619	0.0451174	Others	Others	Others	Others	Others	Others	Others	Others	Others	Others
FBgn0014189	Hel25E	33781	-1.76618	8.46e-302	Others	Others	Others	Others	Others	Others	Others	Others	Others	Others
FBgn0032620	CG12288	35027	-1.76364	3.32e-16	Others	Others	Others	Others	Others	Others	Others	Others	Others	Others
FBgn0034075	Asph	36778	-1.7625	1.41e-178	Others	Others	Others	Others	Others	Others	Others	Others	Others	Others
FBgn0003292	rt	39297	-1.76195	7.18e-83	Others	Others	Others	Others	Others	Others	Others	Others	Others	Others
FBgn0250838	roh	246602	-1.75936	3.87e-213	Others	Others	Others	Others	Others	Others	Others	Others	Others	Others
FBgn0025678	CaBP1	34976	-1.75596	2.48e-163	Others	Others	Others	Others	Others	Others	Others	Others	Others	Others
FBgn0003149	Prm	39002	-1.75417	0	Others	Others	Others	Others	Others	Others	Others	Others	Others	Others
FBgn0003346	RanGAP	35223	-1.75214	5.4e-42	Others	Others	Others	Others	Others	Others	Others	Others	Others	Others
FBgn0016691	ATPsynO	41845	-1.75162	8.41e-303	Mitochondria	Others	Others	Others	Others	ETC	Others	Others	Others	Others
FBgn0030537	CG12480	32359	-1.74887	2.15e-275	Others	Others	Others	Others	Others	Others	Others	Others	Others	Others
FBgn0031228	ND-15	33179	-1.74827	1.45e-89	Mitochondria	Others	Others	Others	Others	ETC	Others	Others	Others	Others
FBgn0030955	CG6891	32865	-1.74685	2.57e-56	Others	Others	Others	Others	Others	Others	Others	Others	Others	Others
FBgn0031996	CG8460	34115	-1.74559	1e-60	Others	Others	Others	Others	Others	Others	Others	Others	Others	Others
FBgn0004107	Cdk2	42453	-1.74383	2.34e-35	Others	Others	Others	Others	Others	Others	Others	Others	Others	Others
FBgn0031913	CG5958	34022	-1.74186	7.2e-215	Others	Others	Others	Others	Others	Others	Others	Others	Others	Others
FBgn0039305	CG11858	43044	-1.74057	3.88e-10	Others	Others	Others	Others	Others	Others	Others	Others	Others	Others
FBgn0263133	mEFG1	34004	-1.74024	4.52e-76	Mitochondria	Others	Others	Others	Translation_mito	Others	Others	Others	Others	Others
FBgn0042112	mRpL36	59151	-1.73871	2.38e-26	Mitochondria	Others	Others	Others	Translation_mito	Others	Others	Others	Others	Others
FBgn0030562	CG9400	32385	-1.73372	6.26e-16	Others	Others	Others	Others	Others	Others	Others	Others	Others	Others
FBgn0030980	CG7406	32892	-1.73264	2.86e-283	Others	Others	Others	Others	Others	Others	Others	Others	Others	Others
FBgn0039760	CG9682	43602	-1.73198	2.48e-145	Others	Others	Others	Others	Others	Others	Others	Others	Others	Others
FBgn0030930	Pgant7	32836	-1.73081	1.59e-106	Others	Others	Others	Others	Others	Others	Others	Others	Others	Others
FBgn0039474	CG6283	43250	-1.73054	7.81e-33	Others	Others	Others	Others	Others	Others	Others	Others	Others	Others
FBgn0036749	CG7460	39973	-1.72972	1.33e-29	Mitochondria	Others	Others	Others	Others	Others	Others	Others	Others	Others
FBgn0031378	CG15362	33371	-1.72751	5.65e-25	Others	Others	Others	Others	Others	Others	Others	Others	Others	Others
FBgn0033663	ERp60	36270	-1.72694	0	Others	Others	Others	Others	Others	Others	Others	Others	Others	Others
FBgn0039846	PNPase	43710	-1.72544	1.81e-24	Mitochondria	Others	Others	RNA_metabolism_mito	Others	Others	Others	Others	Others	Others
FBgn0034885	Eglp4	37739	-1.72489	4.53e-296	Others	Others	Others	Others	Others	Others	Others	Others	Others	Others
FBgn0028436	ECSIT	40732	-1.72458	1.43e-46	Mitochondria	Others	Others	Others	Others	Others	Others	Others	Others	Others
FBgn0283658	muc	34021	-1.72455	1.41e-286	Mitochondria	Others	Others	Others	Others	Others	Others	Others	Others	Others
FBgn0261791	SNRPG	32636	-1.72134	2.16e-16	Others	Others	Others	Others	Others	Others	Others	Others	Others	Others
FBgn0038808	Srp14	42436	-1.72104	9.74e-16	Others	Others	Others	Others	Others	Others	Others	Others	Others	Others
FBgn0051427	CR31427	43464	-1.71943	0.000162632	Others	Others	Others	Others	Others	Others	Others	Others	Others	Others
FBgn0036752	Adgf-A	39976	-1.71774	1.69e-132	Others	Others	Others	Others	Others	Others	Others	Others	Others	Others
FBgn0035665	Jon65Aiii	38683	-1.7167	3.01e-199	Others	Others	Others	Others	Others	Others	Others	Others	Others	Others
FBgn0012036	Aldh	34256	-1.71631	0	Mitochondria	Others	Others	Others	Others	Others	Others	Others	Others	Others
FBgn0026403	Ndg	36089	-1.71549	6.17e-208	Others	Others	Others	Others	Others	Others	Others	Others	Others	Others
FBgn0036133	CG7638	39250	-1.7139	1.36e-115	Others	Others	Others	Others	Others	Others	Others	Others	Others	Others
FBgn0033367	PPO2	35910	-1.71313	2.97e-126	Others	Others	Others	Others	Others	Others	Others	Others	Others	Others
FBgn0085220	Ufm1	5740715	-1.71132	3.16e-39	Others	Others	Others	Others	Others	Others	Others	Others	Others	Others
FBgn0033921	tej	36590	-1.709	0.0433272	Others	Others	Others	Others	Others	Others	Others	Others	Others	Others
FBgn0002736	mago	37402	-1.70877	7.72e-88	Others	Others	Others	Others	Others	Others	Others	Others	Others	Others
FBgn0033547	CG12935	36134	-1.70741	3.56e-28	Mitochondria	Others	Others	Others	Others	Others	Others	Others	Others	Others
FBgn0038774	CG5023	42400	-1.70352	1.25e-218	Others	Others	Others	Others	Others	Others	Others	Others	Others	Others
FBgn0011710	2023-09-01	33114	-1.70351	7.79e-05	Others	Others	Others	Others	Others	Others	Others	Others	Others	Others
FBgn0000043	Act42A	35526	-1.7035	5.95e-272	Others	Others	Others	Others	Others	Others	Others	Others	Others	Others
FBgn0262619	DNAlig1	37791	-1.7018	3.02e-30	Mitochondria	Others	Others	Others	Others	Others	Others	Others	Others	Others
FBgn0035428	CG14960	38403	-1.69747	1.99e-127	Others	Others	Others	Others	Others	Others	Others	Others	Others	Others
FBgn0036853	mRpL21	40091	-1.69692	2.53e-46	Mitochondria	Others	Others	Others	Translation_mito	Others	Others	Others	Others	Others
FBgn0039049	CG6726	42728	-1.69637	3.81e-10	Others	Others	Others	Others	Others	Others	Others	Others	Others	Others
FBgn0035798	frac	38850	-1.69479	7.95e-152	Others	Others	Others	Others	Others	Others	Others	Others	Others	Others
FBgn0010213	Sod2	36878	-1.69328	5.05e-208	Mitochondria	Others	Others	Others	Others	Others	Others	Others	Others	Others
FBgn0053138	AGBE	326264	-1.6917	2.64e-180	Others	Others	Others	Others	Others	Others	Others	Others	Others	Others
FBgn0040367	CG11382	31069	-1.6916	4.81e-116	Others	Others	Others	Others	Others	Others	Others	Others	Others	Others
FBgn0011211	blw	37617	-1.6909	1.74e-290	Mitochondria	Others	Others	Others	Others	ETC	Others	Others	Others	Others
FBgn0050154	CG30154	246487	-1.69087	0.0035104	Others	Others	Others	Others	Others	Others	Others	Others	Others	Others
FBgn0000241	bw	37724	-1.68932	3.23e-07	Others	Others	Others	Others	Others	Others	Others	Others	Others	Others
FBgn0038118	timeout	41615	-1.68913	5.94e-10	Others	Others	Others	Others	Others	Others	Others	Others	Others	Others
FBgn0030102	SmydA-9	31859	-1.68901	3.19e-30	Others	Others	Others	Others	Others	Others	Others	Others	Others	Others
FBgn0011336	Stt3B	43005	-1.68777	3.3e-277	Others	Others	Others	Others	Others	Others	Others	Others	Others	Others
FBgn0029665	CG14270	31319	-1.68769	1.07e-23	Mitochondria	Others	Others	Others	Others	Others	Others	Protein_import_insertion_mito	Others	Others
FBgn0021795	Tapdelta	45680	-1.68729	8.04e-216	Others	Others	Others	Others	Others	Others	Others	Others	Others	Others
FBgn0086447	l(2)37Cg	35196	-1.68668	1.11e-05	Others	Others	Others	Others	Others	Others	Others	Others	Others	Others
FBgn0051821	CG31821	34938	-1.68589	1.34e-31	Others	Others	Others	Others	Others	Others	Others	Others	Others	Others
FBgn0050047	CG30047	246414	-1.68536	1.81e-46	Others	Others	Others	Others	Others	Others	Others	Others	Others	Others
FBgn0039835	mRpL32	43698	-1.68471	3.16e-31	Mitochondria	Others	Others	Others	Translation_mito	Others	Others	Others	Others	Others
FBgn0031529	CG9662	33554	-1.68186	2.12e-45	Others	Others	Others	Others	Others	Others	Others	Others	Others	Others
FBgn0034245	UQCR-6.4	36991	-1.68072	7.14e-17	Mitochondria	Others	Others	Others	Others	ETC	Others	Others	Others	Others
FBgn0030598	CG9503	32424	-1.68027	4.67e-35	Others	Others	Others	Others	Others	Others	Others	Others	Others	Others
FBgn0034447	CG7744	37239	-1.67951	3.06e-38	Others	Others	Others	Others	Others	Others	Others	Others	Others	Others
FBgn0040793	CG7630	50266	-1.67831	5.54e-142	Others	Others	Others	Others	Others	Others	Others	Others	Others	Others
FBgn0037696	GstZ1	41132	-1.67688	4.63e-48	Mitochondria	Others	Others	Others	Others	Others	Others	Others	Others	Others
FBgn0038132	apn	41631	-1.67576	1.24e-31	Others	Others	Others	Others	Others	Others	Others	Others	Others	Others
FBgn0036183	CG6083	39305	-1.67551	3.19e-14	Others	Others	Others	Others	Others	Others	Others	Others	Others	Others
FBgn0032053	mRpL51	34186	-1.67499	6.21e-42	Mitochondria	Others	Others	Others	Translation_mito	Others	Others	Others	Others	Others
FBgn0039094	CG10184	42783	-1.66935	6.34e-60	Others	Others	Others	Others	Others	Others	Others	Others	Others	Others
FBgn0016687	Nurf-38	37922	-1.66854	2.05e-269	Mitochondria	Others	Others	Others	Others	Others	Others	Others	Others	Others
FBgn0083968	CG34132	4379884	-1.6684	8.85e-44	Mitochondria	Others	Others	Others	Others	Others	Others	Protein_import_insertion_mito	Others	Others
FBgn0027348	bgm	44117	-1.66322	3.08e-239	Others	Others	Others	Others	Others	Others	Others	Others	Others	Others
FBgn0034435	fest	37220	-1.66264	0.00311542	Others	Others	Others	Others	Others	Others	Others	Others	Others	Others
FBgn0037761	CG8534	41210	-1.66259	1.46e-07	Others	Others	Others	Others	Others	Others	Others	Others	Others	Others
FBgn0031619	CG3355	33667	-1.66079	0	Others	Others	Others	Others	Others	Others	Others	Others	Others	Others
FBgn0039159	mRpS24	42870	-1.65865	4.58e-33	Mitochondria	Others	Others	Others	Translation_mito	Others	Others	Others	Others	Others
FBgn0003885	alphaTub84D	40904	-1.65664	3.34e-156	Others	Others	Others	Others	Others	Others	Others	Others	Others	Others
FBgn0283479	Alp1	40372	-1.65623	2.95e-24	Others	Others	Others	Others	Others	Others	Others	Others	Others	Others
FBgn0031875	CG3430	33976	-1.65532	9.58e-20	Others	Others	Others	Others	Others	Others	Others	Others	Others	Others
FBgn0036979	CG13247	40247	-1.65529	1.42e-15	Others	Others	Others	Others	Others	Others	Others	Others	Others	Others
FBgn0038437	Sdhaf3	42004	-1.65525	2.13e-09	Mitochondria	Others	Others	Others	Others	Others	Others	Others	Others	Others
FBgn0039172	Spase22-23	42885	-1.655	7.33e-88	Others	Others	Others	Others	Others	Others	Others	Others	Others	Others
FBgn0037707	RnpS1	41147	-1.65284	3.86e-19	Others	Others	Others	Others	Others	Others	Others	Others	Others	Others
FBgn0042110	CG18765	59149	-1.65252	1.07e-10	Others	Others	Others	Others	Others	Others	Others	Others	Others	Others
FBgn0051184	LSm3	42842	-1.65239	6.55e-19	Others	Others	Others	Others	Others	Others	Others	Others	Others	Others
FBgn0040078	pont	53439	-1.65141	7.05e-85	Others	Others	Others	Others	Others	Others	Others	Others	Others	Others
FBgn0015075	Ddx1	40457	-1.64889	7.12e-44	Others	Others	Others	Others	Others	Others	Others	Others	Others	Others
FBgn0261068	LSm7	35003	-1.64781	4.08e-17	Others	Others	Others	Others	Others	Others	Others	Others	Others	Others
FBgn0034061	Ufc1	36762	-1.64733	3.14e-25	Others	Others	Others	Others	Others	Others	Others	Others	Others	Others
FBgn0003312	sad	44858	-1.64724	1.23e-10	Mitochondria	Others	Others	Others	Others	Others	Others	Others	Others	Others
FBgn0033549	mms4	36136	-1.64654	5.45e-05	Others	Others	Others	Others	Others	Others	Others	Others	Others	Others
FBgn0037894	Ranbp9	41367	-1.64572	6.64e-67	Others	Others	Others	Others	Others	Others	Others	Others	Others	Others
FBgn0261993	CG42811	10178941	-1.64392	0.00346108	Others	Others	Others	Others	Others	Others	Others	Others	Others	Others
FBgn0051777	CG31777	261617	-1.64119	0.000986302	Others	Others	Others	Others	Others	Others	Others	Others	Others	Others
FBgn0052230	ND-MLRQ	317928	-1.63878	1.47e-39	Mitochondria	Others	Others	Others	Others	ETC	Others	Others	Others	Others
FBgn0083983	mRpL34	4379878	-1.63744	0.00796405	Mitochondria	Others	Others	Others	Translation_mito	Others	Others	Others	Others	Others
FBgn0036728	UQCR-Q	39950	-1.6368	3.68e-135	Mitochondria	Others	Others	Others	Others	ETC	Others	Others	Others	Others
FBgn0024289	Sodh-1	40836	-1.63643	9.96e-140	Others	Others	Others	Others	Others	Others	Others	Others	Others	Others
FBgn0263916	Ent2	33921	-1.63405	2.19e-144	Others	Others	Others	Others	Others	Others	Others	Others	Others	Others
FBgn0000045	Act79B	40444	-1.63305	0.00318265	Others	Others	Others	Others	Others	Others	Others	Others	Others	Others
FBgn0010109	dpn	35800	-1.63291	0.00292427	Others	Others	Others	Others	Others	Others	Others	Others	Others	Others
FBgn0027580	PCB	36020	-1.63179	9.48e-220	Mitochondria	Others	Others	Others	Others	Others	Others	Others	Others	Others
FBgn0030480	Tim9a	32294	-1.63159	6.93e-10	Mitochondria	Others	Others	Others	Others	Others	Others	Protein_import_insertion_mito	Others	Others
FBgn0039867	CstF50	43734	-1.63084	8.62e-33	Others	Others	Others	Others	Others	Others	Others	Others	Others	Others
FBgn0051126	CG31126	326121	-1.62914	2.45e-21	Mitochondria	Others	Others	Others	Others	Others	Others	Others	Others	Others
FBgn0004378	Klp61F	38135	-1.62857	5.9e-06	Others	Others	Others	Others	Others	Others	Others	Others	Others	Others
FBgn0035162	Sf3b3	38093	-1.62853	9.4e-20	Others	Others	Others	Others	Others	Others	Others	Others	Others	Others
FBgn0039630	CG11843	43432	-1.6276	0.000631182	Others	Others	Others	Others	Others	Others	Others	Others	Others	Others
FBgn0039778	Jon99Fi	43622	-1.62539	0	Others	Others	Others	Others	Others	Others	Others	Others	Others	Others
FBgn0051450	mRpS18A	326141	-1.62481	3.33e-64	Mitochondria	Others	Others	Others	Translation_mito	Others	Others	Others	Others	Others
FBgn0040529	COX7A	50002	-1.62371	7.78e-199	Mitochondria	Others	Others	Others	Others	ETC	Others	Others	Others	Others
FBgn0033949	Had2	36624	-1.62358	7.43e-112	Others	Others	Others	Others	Others	Others	Others	Others	Others	Others
FBgn0033827	CG17047	36478	-1.62219	5.11e-76	Others	Others	Others	Others	Others	Others	Others	Others	Others	Others
FBgn0014141	cher	42066	-1.62191	0	Others	Others	Others	Others	Others	Others	Others	Others	Others	Others
FBgn0000146	aub	34524	-1.61841	0.00080683	Others	Others	Others	Others	Others	Others	Others	Others	Others	Others
FBgn0035887	Jon66Cii	38953	-1.61833	1.57e-269	Others	Others	Others	Others	Others	Others	Others	Others	Others	Others
FBgn0031277	CG13947	33250	-1.61797	3.7e-09	Others	Others	Others	Others	Others	Others	Others	Others	Others	Others
FBgn0085359	CG34330	2768869	-1.6163	2.82e-25	Others	Others	Others	Others	Others	Others	Others	Others	Others	Others
FBgn0027552	CG10863	38463	-1.61612	0	Others	Others	Others	Others	Others	Others	Others	Others	Others	Others
FBgn0039004	Nup133	42680	-1.61608	7.34e-23	Others	Others	Others	Others	Others	Others	Others	Others	Others	Others
FBgn0039776	PH4alphaEFB	43620	-1.61599	1.11e-81	Others	Others	Others	Others	Others	Others	Others	Others	Others	Others
FBgn0037930	CG14715	41403	-1.61559	4.56e-41	Others	Others	Others	Others	Others	Others	Others	Others	Others	Others
FBgn0036990	mRpL15	40261	-1.61501	8.46e-64	Mitochondria	Others	Others	Others	Translation_mito	Others	Others	Others	Others	Others
FBgn0030572	mRpS25	32395	-1.61501	5.91e-40	Mitochondria	Others	Others	Others	Translation_mito	Others	Others	Others	Others	Others
FBgn0030503	Tango2	32319	-1.6141	3.41e-36	Others	Others	Others	Others	Others	Others	Others	Others	Others	Others
FBgn0031639	mRpS2	33688	-1.61371	3.61e-36	Mitochondria	Others	Others	Others	Translation_mito	Others	Others	Others	Others	Others
FBgn0022343	CG3760	37987	-1.61251	3.24e-115	Others	Others	Others	Others	Others	Others	Others	Others	Others	Others
FBgn0036763	TrpRS-m	39989	-1.61079	1.22e-51	Mitochondria	Others	Others	RNA_metabolism_mito	Translation_mito	Others	Others	Others	Others	Others
FBgn0035355	CG16985	38323	-1.61073	2.8e-11	Others	Others	Others	Others	Others	Others	Others	Others	Others	Others
FBgn0032833	COX4	35279	-1.61064	1.45e-202	Mitochondria	Others	Others	Others	Others	ETC	Others	Others	Others	Others
FBgn0038484	CG5246	42072	-1.61022	1.09e-28	Others	Others	Others	Others	Others	Others	Others	Others	Others	Others
FBgn0047135	CG32276	251645	-1.60986	3.24e-143	Others	Others	Others	Others	Others	Others	Others	Others	Others	Others
FBgn0027945	ppl	40349	-1.60976	6.14e-51	Mitochondria	Others	Others	Others	Others	Others	Others	Others	Others	Others
FBgn0032721	CG10602	35146	-1.60936	9.16e-152	Others	Others	Others	Others	Others	Others	Others	Others	Others	Others
FBgn0031505	ND-B14.5B	33528	-1.60792	4.02e-48	Mitochondria	Others	Others	Others	Others	ETC	Others	Others	Others	Others
FBgn0087021	Spc25	41585	-1.60685	0.000162632	Others	Others	Others	Others	Others	Others	Others	Others	Others	Others
FBgn0032848	nesd	35298	-1.60648	2.72e-10	Others	Others	Others	Others	Others	Others	Others	Others	Others	Others
FBgn0014454	Acp1	34052	-1.60629	0.011315	Others	Others	Others	Others	Others	Others	Others	Others	Others	Others
FBgn0261790	SmE	34080	-1.60259	2.65e-16	Others	Others	Others	Others	Others	Others	Others	Others	Others	Others
FBgn0037165	CG11437	40470	-1.60217	5.8e-113	Others	Others	Others	Others	Others	Others	Others	Others	Others	Others
FBgn0262801	twr	40815	-1.60192	1.49e-172	Others	Others	Others	Others	Others	Others	Others	Others	Others	Others
FBgn0033085	CG15908	35567	-1.60162	5.49e-13	Others	Others	Others	Others	Others	Others	Others	Others	Others	Others
FBgn0039264	CG11786	42998	-1.60135	6.28e-27	Others	Others	Others	Others	Others	Others	Others	Others	Others	Others
FBgn0013772	Cyp6a8	36666	-1.60103	1.11e-29	Others	Others	Others	Others	Others	Others	Others	Others	Others	Others
FBgn0263979	Caf1-55	41836	-1.60067	1.34e-78	Others	Others	Others	Others	Others	Others	Others	Others	Others	Others
FBgn0035032	ATPsynF	37931	-1.60003	1.72e-227	Mitochondria	Others	Others	Others	Others	ETC	Others	Others	Others	Others
FBgn0000075	amd	35188	-1.59993	1.38e-61	Others	Others	Others	Others	Others	Others	Others	Others	Others	Others
FBgn0032002	CG8353	34123	-1.59933	4.38e-32	Others	Others	Others	Others	Others	Others	Others	Others	Others	Others
FBgn0038196	CG9922	41708	-1.59921	1.04e-33	Others	Others	Others	Others	Others	Others	Others	Others	Others	Others
FBgn0028479	Mtpalpha	34276	-1.59891	5.8e-219	Mitochondria	Others	Others	Others	Others	Others	Others	Others	Others	Others
FBgn0039635	Pdhb	43437	-1.59754	1.23e-187	Mitochondria	Others	Others	Others	Others	Others	Others	Others	Others	Others
FBgn0030947	CG6696	32856	-1.59221	2.35e-08	Others	Others	Others	Others	Others	Others	Others	Others	Others	Others
FBgn0010425	epsilonTry	49080	-1.59206	0	Others	Others	Others	Others	Others	Others	Others	Others	Others	Others
FBgn0036730	qjt	39952	-1.59161	0.0108511	Others	Others	Others	Others	Others	Others	Others	Others	Others	Others
FBgn0039735	Nph	43559	-1.59108	1.19e-130	Others	Others	Others	Others	Others	Others	Others	Others	Others	Others
FBgn0264562	Hr4	31162	-1.59051	1.54e-40	Others	Others	Others	Others	Others	Others	Others	Others	Others	Others
FBgn0035901	Pus7	38969	-1.58973	9.69e-18	Others	Others	Others	Others	Others	Others	Others	Others	Others	Others
FBgn0004432	Cyp1	32595	-1.5887	0	Mitochondria	Others	Others	Others	Others	Others	Others	Others	Others	Others
FBgn0261380	mRpL37	41293	-1.588	8.58e-44	Mitochondria	Others	Others	Others	Translation_mito	Others	Others	Others	Others	Others
FBgn0000667	Actn	31166	-1.58512	2.33e-284	Others	Others	Others	Others	Others	Others	Others	Others	Others	Others
FBgn0050148	CG30148	37318	-1.58414	1.02e-06	Others	Others	Others	Others	Others	Others	Others	Others	Others	Others
FBgn0038126	CG8483	41623	-1.58298	3.3e-161	Others	Others	Others	Others	Others	Others	Others	Others	Others	Others
FBgn0034819	CG9877	37666	-1.57966	1.02e-60	Others	Others	Others	Others	Others	Others	Others	Others	Others	Others
FBgn0051344	CG31344	41835	-1.57877	2.63e-78	Others	Others	Others	Others	Others	Others	Others	Others	Others	Others
FBgn0034688	CG11474	37514	-1.5774	1.76e-95	Others	Others	Others	Others	Others	Others	Others	Others	Others	Others
FBgn0039830	ATPsynC	43693	-1.57696	0	Mitochondria	Others	Others	Others	Others	ETC	Others	Others	Others	Others
FBgn0025832	Fen1	36887	-1.57691	7.9e-28	Others	Others	Others	Others	Others	Others	Others	Others	Others	Others
FBgn0015570	alpha-Est2	40908	-1.5753	1.92e-45	Others	Others	Others	Others	Others	Others	Others	Others	Others	Others
FBgn0035464	PIG-B	38446	-1.5726	1.98e-145	Others	Others	Others	Others	Others	Others	Others	Others	Others	Others
FBgn0033725	Cpr49Ac	36348	-1.57236	3.07e-73	Others	Others	Others	Others	Others	Others	Others	Others	Others	Others
FBgn0001280	janA	43569	-1.57144	7.29e-16	Others	Others	Others	Others	Others	Others	Others	Others	Others	Others
FBgn0085339	CG34310	5740536	-1.57129	2.97e-49	Others	Others	Others	Others	Others	Others	Others	Others	Others	Others
FBgn0036815	HipHop	40047	-1.57091	5.99e-10	Others	Others	Others	Others	Others	Others	Others	Others	Others	Others
FBgn0039667	FipoQ	43475	-1.56998	4.15e-71	Others	Others	Others	Others	Others	Others	Others	Others	Others	Others
FBgn0022224	ubl	35592	-1.5697	8.12e-05	Others	Others	Others	Others	Others	Others	Others	Others	Others	Others
FBgn0031654	Jon25Bii	33707	-1.56922	5.56e-164	Others	Others	Others	Others	Others	Others	Others	Others	Others	Others
FBgn0038810	Srp72	42439	-1.56912	1.18e-155	Others	Others	Others	Others	Others	Others	Others	Others	Others	Others
FBgn0036361	CG10154	39509	-1.56818	4.98e-273	Others	Others	Others	Others	Others	Others	Others	Others	Others	Others
FBgn0038214	CG9616	41731	-1.5676	2.46e-12	Others	Others	Others	Others	Others	Others	Others	Others	Others	Others
FBgn0044030	mRpS14	117414	-1.56629	1.18e-19	Mitochondria	Others	Others	Others	Translation_mito	Others	Others	Others	Others	Others
FBgn0038115	CG7966	41610	-1.56465	2.93e-114	Others	Others	Others	Others	Others	Others	Others	Others	Others	Others
FBgn0036919	Grasp65	40177	-1.56211	2.94e-88	Others	Others	Others	Others	Others	Others	Others	Others	Others	Others
FBgn0259203	CG42307	7354423	-1.5609	0.000102946	Others	Others	Others	Others	Others	Others	Others	Others	Others	Others
FBgn0262116	RNASEK	3355016	-1.56014	2.89e-52	Others	Others	Others	Others	Others	Others	Others	Others	Others	Others
FBgn0284243	betaTub56D	37238	-1.55961	0	Others	Others	Others	Others	Others	Others	Others	Others	Others	Others
FBgn0053506	CG33506	3346177	-1.55738	1.55e-50	Others	Others	Others	Others	Others	Others	Others	Others	Others	Others
FBgn0030292	CG11752	32076	-1.55705	1.79e-47	Mitochondria	Others	Others	Others	Others	ETC	Others	Others	Others	Others
FBgn0032085	CG9555	34223	-1.5555	2.4e-50	Others	Others	Others	Others	Others	Others	Others	Others	Others	Others
FBgn0261373	CG33228	2768732	-1.55348	1.77e-16	Others	Others	Others	Others	Others	Others	Others	Others	Others	Others
FBgn0037569	tex	40983	-1.55087	1.08e-13	Others	Others	Others	Others	Others	Others	Others	Others	Others	Others
FBgn0034437	CG10051	37222	-1.55083	2.61e-79	Others	Others	Others	Others	Others	Others	Others	Others	Others	Others
FBgn0000042	Act5C	31521	-1.54997	4.12e-62	Others	Others	Others	Others	Others	Others	Others	Others	Others	Others
FBgn0035402	Usp5	38375	-1.5499	3e-32	Others	Others	Others	Others	Others	Others	Others	Others	Others	Others
FBgn0030805	wus	32683	-1.54925	3.46e-56	Others	Others	Others	Others	Others	Others	Others	Others	Others	Others
FBgn0284256	bsf	35100	-1.54887	9.8e-69	Mitochondria	Others	Others	RNA_metabolism_mito	Others	Others	Others	Others	Others	Others
FBgn0034052	CG8299	36751	-1.54878	2.42e-18	Others	Others	Others	Others	Others	Others	Others	Others	Others	Others
FBgn0024556	mEFTu1	44438	-1.54864	6.8e-127	Mitochondria	Others	Others	Others	Translation_mito	Others	Others	Others	Others	Others
FBgn0028544	Vajk3	34812	-1.54842	6.71e-266	Others	Others	Others	Others	Others	Others	Others	Others	Others	Others
FBgn0040102	lectin-24Db	53550	-1.54794	0.00761709	Others	Others	Others	Others	Others	Others	Others	Others	Others	Others
FBgn0035603	Pfdn4	38615	-1.54792	1.01e-18	Others	Others	Others	Others	Others	Others	Others	Others	Others	Others
FBgn0039562	Gp93	43354	-1.54792	1.35e-242	Mitochondria	Others	Others	Others	Others	Others	Others	Others	Others	Others
FBgn0032033	CG13392	34157	-1.54651	2.97e-15	Mitochondria	Others	Others	Others	Others	Others	Others	Others	Others	Others
FBgn0051229	CG31229	318636	-1.54597	3.98e-24	Mitochondria	Others	Others	Others	Others	Others	Others	Protein_import_insertion_mito	Others	Others
FBgn0031143	CG1532	33076	-1.54548	3.58e-166	Mitochondria	Others	Others	Others	Others	Others	Others	Others	Others	Others
FBgn0030344	Nrd1	32143	-1.54525	2.28e-33	Mitochondria	Others	Others	Others	Others	Others	Others	Others	Others	Others
FBgn0031489	CG17224	33510	-1.54456	1.49e-22	Others	Others	Others	Others	Others	Others	Others	Others	Others	Others
FBgn0031948	CG7149	34063	-1.54447	4.26e-47	Others	Others	Others	Others	Others	Others	Others	Others	Others	Others
FBgn0039769	CG15534	43613	-1.54368	6.9e-84	Others	Others	Others	Others	Others	Others	Others	Others	Others	Others
FBgn0033816	CG4679	36466	-1.54268	8.54e-107	Mitochondria	Others	Others	Others	Translation_mito	Others	Others	Others	Others	Others
FBgn0033100	CG3420	35585	-1.54267	1.26e-23	Mitochondria	Others	Others	Others	Others	Others	Others	Others	Others	Others
FBgn0036824	CG3902	40059	-1.54236	1.28e-296	Mitochondria	Others	Others	Others	Others	Others	Others	Others	Others	Others
FBgn0016119	ATPsynCF6	42759	-1.5418	2.77e-61	Mitochondria	Others	Others	Others	Others	ETC	Others	Others	Others	Others
FBgn0032166	CG4619	34321	-1.54059	2.73e-57	Mitochondria	Others	Others	RNA_metabolism_mito	Others	Others	Others	Others	Others	Others
FBgn0283437	PPO1	37044	-1.53954	4.1e-146	Others	Others	Others	Others	Others	Others	Others	Others	Others	Others
FBgn0028699	Rh50	38589	-1.53886	8.26e-27	Others	Others	Others	Others	Others	Others	Others	Others	Others	Others
FBgn0032242	CG5355	34421	-1.53812	3.71e-87	Others	Others	Others	Others	Others	Others	Others	Others	Others	Others
FBgn0014868	Ost48	31849	-1.53773	1.61e-186	Others	Others	Others	Others	Others	Others	Others	Others	Others	Others
FBgn0034753	CG2852	37591	-1.5376	1.19e-121	Mitochondria	Others	Others	Others	Others	Others	Others	Others	Others	Others
FBgn0022160	Gpo1	47611	-1.53717	2.55e-173	Mitochondria	Others	Others	Others	Others	Others	Others	Others	Others	Others
FBgn0027513	ana2	35878	-1.53598	3.69e-05	Others	Others	Others	Others	Others	Others	Others	Others	Others	Others
FBgn0025815	Mcm6	31603	-1.5335	1.11e-25	Others	Others	Others	Others	Others	Others	Others	Others	Others	Others
FBgn0053548	SmydA-8	31200	-1.53061	2.96e-46	Others	Others	Others	Others	Others	Others	Others	Others	Others	Others
FBgn0040340	TRAM	31042	-1.52963	2.77e-134	Others	Others	Others	Others	Others	Others	Others	Others	Others	Others
FBgn0260399	gwl	45969	-1.52956	0.000596118	Others	Others	Others	Others	Others	Others	Others	Others	Others	Others
FBgn0031066	COX6B	32989	-1.52635	1.82e-179	Mitochondria	Others	Others	Others	Others	ETC	Others	Others	Others	Others
FBgn0031801	CG9498	33885	-1.52603	2.42e-114	Others	Others	Others	Others	Others	Others	Others	Others	Others	Others
FBgn0030122	Aladin	31881	-1.52469	7.56e-21	Others	Others	Others	Others	Others	Others	Others	Others	Others	Others
FBgn0039073	CG4408	42762	-1.52435	3.25e-33	Others	Others	Others	Others	Others	Others	Others	Others	Others	Others
FBgn0033482	CG1371	36053	-1.52415	2.42e-76	Others	Others	Others	Others	Others	Others	Others	Others	Others	Others
FBgn0013954	Fkbp12	37214	-1.52348	2.45e-131	Others	Others	Others	Others	Others	Others	Others	Others	Others	Others
FBgn0023395	Chd3	40111	-1.5227	1.07e-05	Others	Others	Others	Others	Others	Others	Others	Others	Others	Others
FBgn0039780	PH4alphaNE1	43625	-1.52237	3.6e-30	Others	Others	Others	Others	Others	Others	Others	Others	Others	Others
FBgn0032720	mRpL13	35145	-1.52224	1.63e-21	Mitochondria	Others	Others	Others	Translation_mito	Others	Others	Others	Others	Others
FBgn0035375	Pgant6	38346	-1.52048	4.46e-57	Others	Others	Others	Others	Others	Others	Others	Others	Others	Others
FBgn0040389	mRpL14	31222	-1.52026	2.38e-30	Mitochondria	Others	Others	Others	Translation_mito	Others	Others	Others	Others	Others
FBgn0037232	Suv3	40543	-1.5202	9.11e-51	Mitochondria	Others	Others	RNA_metabolism_mito	Others	Others	Others	Others	Others	Others
FBgn0033378	tsu	35924	-1.519	6.96e-26	Others	Others	Others	Others	Others	Others	Others	Others	Others	Others
FBgn0286783	Etf-QO	36031	-1.51886	7.36e-123	Mitochondria	Others	Others	Others	Others	ETC	Others	Others	Others	Others
FBgn0053002	mRpL27	318825	-1.51736	4.65e-24	Mitochondria	Others	Others	Others	Translation_mito	Others	Others	Others	Others	Others
FBgn0037330	mRpL44	40656	-1.51715	1.37e-56	Mitochondria	Others	Others	RNA_metabolism_mito	Translation_mito	Others	Others	Others	Others	Others
FBgn0003884	alphaTub84B	40848	-1.51611	0	Others	Others	Others	Others	Others	Others	Others	Others	Others	Others
FBgn0033480	mRpL42	36050	-1.51584	1.27e-13	Mitochondria	Others	Others	Others	Translation_mito	Others	Others	Others	Others	Others
FBgn0032849	mRpS18B	35299	-1.51484	2.54e-28	Mitochondria	Others	Others	Others	Translation_mito	Others	Others	Others	Others	Others
FBgn0037580	DppIII	40996	-1.51256	8.49e-196	Others	Others	Others	Others	Others	Others	Others	Others	Others	Others
FBgn0032746	CG10470	35174	-1.51162	7.59e-59	Others	Others	Others	Others	Others	Others	Others	Others	Others	Others
FBgn0039293	Alg9	43031	-1.51068	5.5e-44	Others	Others	Others	Others	Others	Others	Others	Others	Others	Others
FBgn0261800	LanB1	34068	-1.50901	3.29e-129	Others	Others	Others	Others	Others	Others	Others	Others	Others	Others
FBgn0034893	mRpL43	37750	-1.50867	3.34e-28	Mitochondria	Others	Others	Others	Translation_mito	Others	Others	Others	Others	Others
FBgn0036975	CG5618	40241	-1.50864	6.75e-53	Others	Others	Others	Others	Others	Others	Others	Others	Others	Others
FBgn0027868	Nup107	34481	-1.50735	5.04e-63	Others	Others	Others	Others	Others	Others	Others	Others	Others	Others
FBgn0034001	mRpL41	36688	-1.50726	4.7e-17	Mitochondria	Others	Others	Others	Translation_mito	Others	Others	Others	Others	Others
FBgn0016675	Lectin-galC1	35216	-1.5059	9.6e-21	Others	Others	Others	Others	Others	Others	Others	Others	Others	Others
FBgn0036023	CG18179	39124	-1.50531	4.25e-40	Others	Others	Others	Others	Others	Others	Others	Others	Others	Others
FBgn0031886	Nuf2	33992	-1.50449	1.78e-05	Others	Others	Others	Others	Others	Others	Others	Others	Others	Others
FBgn0020255	Ran	44072	-1.50446	1.11e-252	Others	Others	Others	Others	Others	Others	Others	Others	Others	Others
FBgn0023529	CG2918	31215	-1.50397	4.68e-189	Others	Others	Others	Others	Others	Others	Others	Others	Others	Others
FBgn0053493	CG33493	2768994	-1.50233	1.71e-34	Mitochondria	Others	Others	Others	Others	Others	Others	Others	Others	Others
FBgn0038961	CG13850	42630	-1.50213	1.13e-135	Mitochondria	Others	Others	RNA_metabolism_mito	Others	Others	Others	Others	Others	Others
FBgn0030836	CG8664	32719	-1.5014	3.07e-62	Others	Others	Others	Others	Others	Others	Others	Others	Others	Others
FBgn0051683	CG31683	261623	-1.5012	7.41e-14	Others	Others	Others	Others	Others	Others	Others	Others	Others	Others
FBgn0025111	Ant2	32008	-1.49972	7.1e-06	Mitochondria	Others	Others	Others	Others	Others	Others	Others	Others	Others
FBgn0037807	CG6293	41259	-1.49883	1.02e-34	Others	Others	Others	Others	Others	Others	Others	Others	Others	Others
FBgn0038224	ATPsynE	41745	-1.49666	7.55e-148	Mitochondria	Others	Others	Others	Others	ETC	Others	Others	Others	Others
FBgn0038450	CG17560	42022	-1.49607	5.09e-33	Others	Others	Others	Others	Others	Others	Others	Others	Others	Others
FBgn0037846	CG6574	41308	-1.4959	5.5e-44	Others	Others	Others	Others	Others	Others	Others	Others	Others	Others
FBgn0015553	tos	35119	-1.49472	4.7e-06	Others	Others	Others	Others	Others	Others	Others	Others	Others	Others
FBgn0035625	Blimp-1	38638	-1.49441	8.17e-22	Others	Others	Others	Others	Others	Others	Others	Others	Others	Others
FBgn0039387	Mco3	43134	-1.49381	7.38e-14	Others	Others	Others	Others	Others	Others	Others	Others	Others	Others
FBgn0262983	CG43291	12797901	-1.49365	0.0163519	Others	Others	Others	Others	Others	Others	Others	Others	Others	Others
FBgn0032195	CG4908	34360	-1.49342	4.32e-28	Mitochondria	Others	Others	Others	Others	Others	Others	Others	Others	Others
FBgn0035057	CG3880	37957	-1.49335	6.29e-07	Others	Others	Others	Others	Others	Others	Others	Others	Others	Others
FBgn0037144	CG7458	40441	-1.4932	1.53e-15	Others	Others	Others	Others	Others	Others	Others	Others	Others	Others
FBgn0029155	Men-b	43936	-1.49227	2.15e-183	Mitochondria	Others	Others	Others	Others	Others	Others	Others	Others	Others
FBgn0284220	Top2	35225	-1.49096	1.15e-41	Others	Others	Others	Others	Others	Others	Others	Others	Others	Others
FBgn0038894	CG15497	42552	-1.4899	4.01e-15	Others	Others	Others	Others	Others	Others	Others	Others	Others	Others
FBgn0037972	CG10005	41451	-1.48983	2.54e-25	Others	Others	Others	Others	Others	Others	Others	Others	Others	Others
FBgn0032646	mEFTs	35060	-1.48868	6.46e-62	Mitochondria	Others	Others	Others	Translation_mito	Others	Others	Others	Others	Others
FBgn0037834	Art1	41295	-1.48774	1.05e-113	Others	Others	Others	Others	Others	Others	Others	Others	Others	Others
FBgn0052267	CG32267	317946	-1.48769	1.77e-18	Others	Others	Others	Others	Others	Others	Others	Others	Others	Others
FBgn0033826	CG4734	36477	-1.48743	4.99e-150	Others	Others	Others	Others	Others	Others	Others	Others	Others	Others
FBgn0085330	CG34301	5740866	-1.48718	0.0124192	Others	Others	Others	Others	Others	Others	Others	Others	Others	Others
FBgn0028342	ATPsyndelta	31950	-1.48579	2.18e-181	Mitochondria	Others	Others	Others	Others	ETC	Others	Others	Others	Others
FBgn0034736	gas	37572	-1.48422	1.52e-22	Others	Others	Others	Others	Others	Others	Others	Others	Others	Others
FBgn0086253	rumi	326122	-1.48398	3.28e-16	Others	Others	Others	Others	Others	Others	Others	Others	Others	Others
FBgn0031992	Acbp1	34111	-1.47984	6.66e-29	Others	Others	Others	Others	Others	Others	Others	Others	Others	Others
FBgn0028700	RfC38	34550	-1.47839	2.64e-19	Others	Others	Others	Others	Others	Others	Others	Others	Others	Others
FBgn0061492	loj	38698	-1.47795	1.3e-115	Others	Others	Others	Others	Others	Others	Others	Others	Others	Others
FBgn0037057	CG10512	40339	-1.47722	1.19e-97	Others	Others	Others	Others	Others	Others	Others	Others	Others	Others
FBgn0003714	tko	31228	-1.47614	5.8e-72	Mitochondria	Others	Others	Others	Translation_mito	Others	Others	Others	Others	Others
FBgn0038903	RpI12	42563	-1.47437	1.55e-05	Others	Others	Others	Others	Others	Others	Others	Others	Others	Others
FBgn0250848	26-29-p	39547	-1.47352	1.42e-211	Others	Others	Others	Others	Others	Others	Others	Others	Others	Others
FBgn0031879	uif	33983	-1.47293	2.04e-202	Others	Others	Others	Others	Others	Others	Others	Others	Others	Others
FBgn0086356	tum	36538	-1.47247	4.52e-15	Others	Others	Others	Others	Others	Others	Others	Others	Others	Others
FBgn0033357	Tom7	35899	-1.47241	1.57e-23	Mitochondria	Others	Others	Others	Others	Others	Others	Protein_import_insertion_mito	Others	Others
FBgn0036622	Agpat4	39819	-1.47227	1.26e-158	Others	Others	Others	Others	Others	Others	Others	Others	Others	Others
FBgn0036997	CG5955	40268	-1.47211	1.69e-30	Others	Others	Others	Others	Others	Others	Others	Others	Others	Others
FBgn0027095	Manf	41983	-1.47084	2.84e-115	Others	Others	Others	Others	Others	Others	Others	Others	Others	Others
FBgn0037652	CG11980	41078	-1.47068	4.14e-112	Others	Others	Others	Others	Others	Others	Others	Others	Others	Others
FBgn0035374	mRpS35	38345	-1.46953	1.76e-62	Mitochondria	Others	Others	Others	Translation_mito	Others	Others	Others	Others	Others
FBgn0016120	ATPsynD	42291	-1.46827	1.25e-182	Mitochondria	Others	Others	Others	Others	ETC	Others	Others	Others	Others
FBgn0031436	ND-B17.2	33443	-1.46783	2.65e-85	Mitochondria	Others	Others	Others	Others	ETC	Others	Others	Others	Others
FBgn0029118	ScsbetaG	44001	-1.46655	3.63e-113	Mitochondria	Others	Others	Others	Others	Others	Others	Others	TCA	Others
FBgn0035484	CG11594	38473	-1.46594	6.21e-120	Others	Others	Others	Others	Others	Others	Others	Others	Others	Others
FBgn0283525	l(2)10685	33293	-1.46578	6.45e-26	Mitochondria	Others	Others	RNA_metabolism_mito	Others	Others	Others	Others	Others	Others
FBgn0284248	Cyt-c-p	34996	-1.46248	3.27e-247	Mitochondria	Others	Others	Others	Others	ETC	Others	Others	Others	Others
FBgn0014869	Pglym78	43447	-1.46188	1.61e-298	Others	Others	Others	Others	Others	Others	Others	Others	Others	Others
FBgn0037419	Osi12	40766	-1.46158	0.0188635	Others	Others	Others	Others	Others	Others	Others	Others	Others	Others
FBgn0003358	Jon99Ci	43545	-1.45828	5.14e-195	Others	Others	Others	Others	Others	Others	Others	Others	Others	Others
FBgn0038673	CG14286	42280	-1.45741	1.45e-07	Others	Others	Others	Others	Others	Others	Others	Others	Others	Others
FBgn0047038	ND-13B	39214	-1.45729	9.48e-79	Mitochondria	Others	Others	Others	Others	ETC	Others	Others	Others	Others
FBgn0001125	Got2	33373	-1.45453	3.01e-249	Mitochondria	Others	Others	Others	Others	Others	Others	Others	Others	Others
FBgn0033048	CG7881	35521	-1.45369	2.33e-35	Others	Others	Others	Others	Others	Others	Others	Others	Others	Others
FBgn0035942	ValRS-m	39023	-1.45272	1.38e-14	Mitochondria	Others	Others	RNA_metabolism_mito	Others	Others	Others	Others	Others	Others
FBgn0261584	CG42694	10178792	-1.4526	4.3e-16	Others	Others	Others	Others	Others	Others	Others	Others	Others	Others
FBgn0038136	CG8774	41635	-1.45206	2.08e-151	Others	Others	Others	Others	Others	Others	Others	Others	Others	Others
FBgn0032219	CG4995	34390	-1.45187	3.58e-21	Mitochondria	Others	Others	Others	Others	Others	Others	Others	Others	Others
FBgn0028325	Pdha	31406	-1.45169	7.41e-278	Mitochondria	Others	Others	Others	Others	Others	Others	Others	Others	Others
FBgn0030251	CG2145	32027	-1.45142	2.06e-91	Others	Others	Others	Others	Others	Others	Others	Others	Others	Others
FBgn0010052	Jhe	36780	-1.45123	0.00155695	Others	Others	Others	Others	Others	Others	Others	Others	Others	Others
FBgn0027083	MetRS-m	41733	-1.4498	9.07e-26	Mitochondria	Others	Others	RNA_metabolism_mito	Others	Others	Others	Others	Others	Others
FBgn0037102	CRIF	40395	-1.44975	3.15e-60	Mitochondria	Others	Others	Others	Others	Others	Others	Others	Others	Others
FBgn0038923	mRpL35	42588	-1.44854	5.39e-33	Mitochondria	Others	Others	Others	Translation_mito	Others	Others	Others	Others	Others
FBgn0036762	CG7430	39988	-1.44623	1.06e-169	Mitochondria	Others	Others	Others	Others	Others	Others	Others	TCA	Others
FBgn0035006	CG4563	37901	-1.44609	2.13e-71	Others	Others	Others	Others	Others	Others	Others	Others	Others	Others
FBgn0002773	Mlc2	43587	-1.44588	0	Others	Others	Others	Others	Others	Others	Others	Others	Others	Others
FBgn0039156	CG6178	42867	-1.44472	2.21e-75	Others	Others	Others	Others	Others	Others	Others	Others	Others	Others
FBgn0037892	mRpL40	41364	-1.44443	3.47e-10	Mitochondria	Others	Others	Others	Translation_mito	Others	Others	Others	Others	Others
FBgn0033570	ND-B14	36159	-1.44417	1.04e-86	Mitochondria	Others	Others	Others	Others	ETC	Others	Others	Others	Others
FBgn0025373	Fpps	36209	-1.44376	1.93e-78	Mitochondria	Others	Others	Others	Others	Others	Others	Others	Others	Others
FBgn0053051	CG33051	39941	-1.4435	1.12e-12	Others	Others	Others	Others	Others	Others	Others	Others	Others	Others
FBgn0019624	COX5A	41432	-1.44206	0	Mitochondria	Others	Others	Others	Others	ETC	Others	Others	Others	Others
FBgn0030686	mRpL3	32523	-1.44132	2.58e-74	Mitochondria	Others	Others	Others	Translation_mito	Others	Others	Others	Others	Others
FBgn0051159	mRRF2	42670	-1.43738	1.04e-12	Mitochondria	Others	Others	Others	Translation_mito	Others	Others	Others	Others	Others
FBgn0028956	mthl3	36961	-1.43583	4.26e-28	Others	Others	Others	Others	Others	Others	Others	Others	Others	Others
FBgn0001197	His2Av	43229	-1.43555	6.83e-164	Others	Others	Others	Others	Others	Others	Others	Others	Others	Others
FBgn0053339	CG33339	2768681	-1.43505	0.00309966	Others	Others	Others	Others	Others	Others	Others	Others	Others	Others
FBgn0030239	CG17333	32013	-1.43315	4.12e-34	Others	Others	Others	Others	Others	Others	Others	Others	Others	Others
FBgn0030539	CG1368	32361	-1.43151	1.37e-215	Others	Others	Others	Others	Others	Others	Others	Others	Others	Others
FBgn0034579	mRpL54	37389	-1.4293	2.03e-34	Mitochondria	Others	Others	Others	Translation_mito	Others	Others	Others	Others	Others
FBgn0051687	CG31687	318886	-1.42821	6.26e-05	Others	Others	Others	Others	Others	Others	Others	Others	Others	Others
FBgn0032014	CG7840	34136	-1.42743	1.86e-34	Others	Others	Others	Others	Others	Others	Others	Others	Others	Others
FBgn0266666	Sem1	50428	-1.42736	1.07e-18	Others	Others	Others	Others	Others	Others	Others	Others	Others	Others
FBgn0022213	Cse1	35016	-1.42548	1.45e-37	Others	Others	Others	Others	Others	Others	Others	Others	Others	Others
FBgn0037386	CG1208	40727	-1.42543	9.35e-37	Others	Others	Others	Others	Others	Others	Others	Others	Others	Others
FBgn0262587	CG43124	12798282	-1.42445	0.000536205	Others	Others	Others	Others	Others	Others	Others	Others	Others	Others
FBgn0037632	CCT7	41054	-1.42424	1.05e-242	Mitochondria	Others	Others	Others	Others	Others	Others	Others	Others	Others
FBgn0025839	ND-B14.5A	31190	-1.4237	1.51e-52	Mitochondria	Others	Others	Others	Others	ETC	Others	Others	Others	Others
FBgn0037819	CG14688	41275	-1.42314	1.73e-27	Others	Others	Others	Others	Others	Others	Others	Others	Others	Others
FBgn0039112	SdhD	42808	-1.42153	3.14e-90	Mitochondria	Others	Others	Others	Others	ETC	Others	Others	TCA	Others
FBgn0039519	Cyp6a18	43304	-1.41787	5.58e-05	Others	Others	Others	Others	Others	Others	Others	Others	Others	Others
FBgn0016075	vkg	33726	-1.41768	1.62e-176	Others	Others	Others	Others	Others	Others	Others	Others	Others	Others
FBgn0030796	CG4829	32672	-1.41754	1.89e-43	Others	Others	Others	Others	Others	Others	Others	Others	Others	Others
FBgn0053281	CG33281	2768938	-1.41693	2.15e-101	Others	Others	Others	Others	Others	Others	Others	Others	Others	Others
FBgn0052250	PMP34	38532	-1.41388	7.1e-56	Others	Others	Others	Others	Others	Others	Others	Others	Others	Others
FBgn0015737	Hmu	43294	-1.41364	6.56e-170	Others	Others	Others	Others	Others	Others	Others	Others	Others	Others
FBgn0035623	mthl2	38636	-1.41343	2.88e-07	Others	Others	Others	Others	Others	Others	Others	Others	Others	Others
FBgn0031540	Pif1	33567	-1.4134	1.16e-09	Others	Others	Others	Others	Others	Others	Others	Others	Others	Others
FBgn0262126	Sec24CD	33409	-1.41331	1.01e-65	Others	Others	Others	Others	Others	Others	Others	Others	Others	Others
FBgn0053303	CG33303	2768916	-1.4119	5.57e-162	Others	Others	Others	Others	Others	Others	Others	Others	Others	Others
FBgn0250874	ttm50	31266	-1.41162	5.26e-50	Mitochondria	Others	Others	Others	Others	Others	Others	Protein_import_insertion_mito	Others	Others
FBgn0028878	CG15269	34887	-1.41133	0.00034219	Others	Others	Others	Others	Others	Others	Others	Others	Others	Others
FBgn0033209	CG12107	35712	-1.41061	1.11e-30	Mitochondria	Others	Others	Others	Others	Others	Others	Others	Others	Others
FBgn0032644	CG5131	35057	-1.40841	2.34e-23	Others	Others	Others	Others	Others	Others	Others	Others	Others	Others
FBgn0034059	CG8320	36759	-1.40716	3.44e-34	Others	Others	Others	Others	Others	Others	Others	Others	Others	Others
FBgn0263038	CG43333	34830	-1.40661	7.71e-59	Others	Others	Others	Others	Others	Others	Others	Others	Others	Others
FBgn0030617	CG9095	32447	-1.40592	1.61e-47	Others	Others	Others	Others	Others	Others	Others	Others	Others	Others
FBgn0050343	Tsen15	246551	-1.40574	0.0444217	Others	Others	Others	Others	Others	Others	Others	Others	Others	Others
FBgn0038524	sll	42115	-1.40509	2.49e-55	Others	Others	Others	Others	Others	Others	Others	Others	Others	Others
FBgn0034877	levy	37728	-1.40317	1.07e-133	Mitochondria	Others	Others	Others	Others	ETC	Others	Others	Others	Others
FBgn0032643	GCS2beta	35056	-1.40243	4.31e-117	Others	Others	Others	Others	Others	Others	Others	Others	Others	Others
FBgn0036580	PDCD-5	39776	-1.39845	4.03e-31	Others	Others	Others	Others	Others	Others	Others	Others	Others	Others
FBgn0030456	CG4332	32267	-1.39818	5.09e-36	Others	Others	Others	Others	Others	Others	Others	Others	Others	Others
FBgn0038771	CG4390	42396	-1.39701	1.7e-82	Others	Others	Others	Others	Others	Others	Others	Others	Others	Others
FBgn0266446	CG45076	19834760	-1.3967	1.44e-181	Others	Others	Others	Others	Others	Others	Others	Others	Others	Others
FBgn0086691	UK114	34897	-1.39655	3.83e-41	Mitochondria	Others	Others	Others	Others	Others	Others	Others	Others	Others
FBgn0264326	DNApol-epsilon255	42758	-1.39651	5.14e-07	Others	Others	Others	Others	Others	Others	Others	Others	Others	Others
FBgn0262104	CG42857	10178851	-1.39607	0.000527263	Others	Others	Others	Others	Others	Others	Others	Others	Others	Others
FBgn0033907	mRpS16	36570	-1.39558	1.02e-07	Mitochondria	Others	Others	Others	Translation_mito	Others	Others	Others	Others	Others
FBgn0037137	Nopp140	40433	-1.39501	3.45e-84	Others	Others	Others	Others	Others	Others	Others	Others	Others	Others
FBgn0010357	betaTry	47901	-1.39498	8.3e-165	Others	Others	Others	Others	Others	Others	Others	Others	Others	Others
FBgn0085320	CG34291	5740331	-1.39336	0.00424562	Others	Others	Others	Others	Others	Others	Others	Others	Others	Others
FBgn0036147	Plod	39265	-1.39293	1.2e-107	Others	Others	Others	Others	Others	Others	Others	Others	Others	Others
FBgn0026576	Pisd	42849	-1.39291	2.23e-87	Mitochondria	Others	Others	Others	Others	Others	Others	Others	Others	Others
FBgn0264695	Mhc	35007	-1.39236	2.7e-210	Others	Others	Others	Others	Others	Others	Others	Others	Others	Others
FBgn0053169	CG33169	40504	-1.39166	1.91e-16	Others	Others	Others	Others	Others	Others	Others	Others	Others	Others
FBgn0010340	140up	41720	-1.39046	3.8e-18	Mitochondria	Others	Others	Others	Others	Others	Others	Others	Others	Others
FBgn0035592	CG10674	38602	-1.39035	6.04e-10	Others	Others	Others	Others	Others	Others	Others	Others	Others	Others
FBgn0036335	mRpL20	39477	-1.39011	1.62e-37	Mitochondria	Others	Others	Others	Translation_mito	Others	Others	Others	Others	Others
FBgn0040534	Sf3b5	50007	-1.38974	0.000147577	Others	Others	Others	Others	Others	Others	Others	Others	Others	Others
FBgn0033760	CG8785	36391	-1.38939	8.72e-145	Others	Others	Others	Others	Others	Others	Others	Others	Others	Others
FBgn0004363	porin	34500	-1.38869	0	Mitochondria	Others	Others	Others	Others	Others	Others	Others	Others	Others
FBgn0032725	Nedd8	35151	-1.3867	3.16e-20	Others	Others	Others	Others	Others	Others	Others	Others	Others	Others
FBgn0032511	ND-B22	34747	-1.38664	4.48e-127	Mitochondria	Others	Others	Others	Others	ETC	Others	Others	Others	Others
FBgn0053307	CG33307	2768914	-1.38574	8.1e-34	Others	Others	Others	Others	Others	Others	Others	Others	Others	Others
FBgn0000451	ect	44135	-1.38465	4.01e-188	Others	Others	Others	Others	Others	Others	Others	Others	Others	Others
FBgn0040384	CG32795	31270	-1.38402	1.24e-82	Others	Others	Others	Others	Others	Others	Others	Others	Others	Others
FBgn0036334	CG11267	39476	-1.3836	1.24e-110	Mitochondria	Others	Others	Others	Others	Others	Others	Others	Others	Others
FBgn0011722	Tig	33896	-1.38332	2.79e-88	Others	Others	Others	Others	Others	Others	Others	Others	Others	Others
FBgn0011361	ND-ACP	38154	-1.38304	4.47e-138	Mitochondria	Others	Others	Others	Others	ETC	Others	Others	Others	Others
FBgn0031561	IM33	33592	-1.38281	9.6e-21	Others	Others	Others	Others	Others	Others	Others	Others	Others	Others
FBgn0005670	Cyp4d1	31188	-1.38242	2.13e-47	Others	Others	Others	Others	Others	Others	Others	Others	Others	Others
FBgn0031260	Spp	33227	-1.38204	8.92e-197	Others	Others	Others	Others	Others	Others	Others	Others	Others	Others
FBgn0016685	Nlp	43560	-1.38137	2.77e-95	Others	Others	Others	Others	Others	Others	Others	Others	Others	Others
FBgn0028468	rtet	42500	-1.38115	4.27e-43	Others	Others	Others	Others	Others	Others	Others	Others	Others	Others
FBgn0038742	Arc42	42364	-1.38101	3.42e-47	Mitochondria	Others	Others	Others	Others	Others	Others	Others	Others	Others
FBgn0036992	Hpd	40263	-1.38045	1.37e-161	Others	Others	Others	Others	Others	Others	Others	Others	Others	Others
FBgn0038819	Cpr92F	42450	-1.37876	8.44e-06	Others	Others	Others	Others	Others	Others	Others	Others	Others	Others
FBgn0020660	eIF4B	3355041	-1.37816	0.0085646	Others	Others	Others	Others	Others	Others	Others	Others	Others	Others
FBgn0002780	mod	43764	-1.37812	2.65e-155	Others	Others	Others	Others	Others	Others	Others	Others	Others	Others
FBgn0029994	Ldsdh1	31726	-1.37651	3.87e-173	Others	Others	Others	Others	Others	Others	Others	Others	Others	Others
FBgn0033873	CG6337	36530	-1.37616	1.61e-53	Others	Others	Others	Others	Others	Others	Others	Others	Others	Others
FBgn0035122	mRpL17	38046	-1.37554	2.11e-42	Mitochondria	Others	Others	Others	Translation_mito	Others	Others	Others	Others	Others
FBgn0262467	Scox	33711	-1.37108	2.19e-56	Mitochondria	Others	Others	Others	Others	Others	Others	Others	Others	Others
FBgn0031021	ND-18	32936	-1.3707	2.95e-60	Mitochondria	Others	Others	Others	Others	ETC	Others	Others	Others	Others
FBgn0038273	CG14860	41803	-1.3703	8.44e-07	Others	Others	Others	Others	Others	Others	Others	Others	Others	Others
FBgn0029512	Aos1	41532	-1.36931	8.69e-40	Others	Others	Others	Others	Others	Others	Others	Others	Others	Others
FBgn0019925	Surf4	41864	-1.36888	5.69e-182	Others	Others	Others	Others	Others	Others	Others	Others	Others	Others
FBgn0038339	CG6118	41884	-1.36885	8.62e-47	Others	Others	Others	Others	Others	Others	Others	Others	Others	Others
FBgn0036323	CG14118	39465	-1.36878	4.78e-18	Others	Others	Others	Others	Others	Others	Others	Others	Others	Others
FBgn0039252	CG11771	42984	-1.36829	2.26e-52	Mitochondria	Others	Others	Others	Others	Others	Others	Others	Others	Others
FBgn0001989	ND-B17	34925	-1.36739	1.12e-56	Mitochondria	Others	Others	Others	Others	ETC	Others	Others	Others	Others
FBgn0033598	Cpr47Eb	36189	-1.36719	8.01e-163	Others	Others	Others	Others	Others	Others	Others	Others	Others	Others
FBgn0035046	ND-19	37946	-1.36638	2.07e-81	Mitochondria	Others	Others	Others	Others	ETC	Others	Others	Others	Others
FBgn0035760	CG8607	38805	-1.36549	7.68e-09	Others	Others	Others	Others	Others	Others	Others	Others	Others	Others
FBgn0033761	CG8778	36392	-1.36518	1.24e-57	Mitochondria	Others	Others	Others	Others	Others	Others	Others	Others	Others
FBgn0263260	sel	36046	-1.36493	5.49e-79	Others	Others	Others	Others	Others	Others	Others	Others	Others	Others
FBgn0085465	CG34436	5740743	-1.36476	0.0220568	Others	Others	Others	Others	Others	Others	Others	Others	Others	Others
FBgn0037746	CG8478	41194	-1.36458	5.9e-11	Others	Others	Others	Others	Others	Others	Others	Others	Others	Others
FBgn0033679	CG8888	36293	-1.36443	1.01e-165	Mitochondria	Others	Others	Others	Others	Others	Others	Others	Others	Others
FBgn0051460	CG31460	318747	-1.36319	2.76e-06	Others	Others	Others	Others	Others	Others	Others	Others	Others	Others
FBgn0035194	Psf1	38136	-1.36284	0.013222	Others	Others	Others	Others	Others	Others	Others	Others	Others	Others
FBgn0033210	U2A	35713	-1.36283	2.18e-23	Others	Others	Others	Others	Others	Others	Others	Others	Others	Others
FBgn0038461	EMC2B	42045	-1.36247	2.3e-17	Others	Others	Others	Others	Others	Others	Others	Others	Others	Others
FBgn0025682	scf	38145	-1.36127	1.35e-116	Others	Others	Others	Others	Others	Others	Others	Others	Others	Others
FBgn0004507	GlyP	33386	-1.35964	7.07e-279	Others	Others	Others	Others	Others	Others	Others	Others	Others	Others
FBgn0031692	TpnC25D	33752	-1.35886	7.53e-58	Others	Others	Others	Others	Others	Others	Others	Others	Others	Others
FBgn0039438	TwdlO	43204	-1.3576	2.09e-135	Others	Others	Others	Others	Others	Others	Others	Others	Others	Others
FBgn0039008	CG6972	42684	-1.35668	2.9e-52	Others	Others	Others	Others	Others	Others	Others	Others	Others	Others
FBgn0002440	l(3)mbn	38701	-1.35544	3.57e-49	Others	Others	Others	Others	Others	Others	Others	Others	Others	Others
FBgn0014179	gcm	34277	-1.355	0.0454921	Others	Others	Others	Others	Others	Others	Others	Others	Others	Others
FBgn0036569	IleRS-m	39762	-1.35464	3.6e-29	Mitochondria	Others	Others	RNA_metabolism_mito	Translation_mito	Others	Others	Others	Others	Others
FBgn0052284	CG32284	317956	-1.35372	6.32e-30	Others	Others	Others	Others	Others	Others	Others	Others	Others	Others
FBgn0026252	msk	44747	-1.35334	2.17e-147	Others	Others	Others	Others	Others	Others	Others	Others	Others	Others
FBgn0031256	shv	33220	-1.35263	5.28e-74	Others	Others	Others	Others	Others	Others	Others	Others	Others	Others
FBgn0033548	CG7637	36135	-1.35259	1.82e-05	Others	Others	Others	Others	Others	Others	Others	Others	Others	Others
FBgn0035829	HP4	38887	-1.35212	4.54e-17	Others	Others	Others	Others	Others	Others	Others	Others	Others	Others
FBgn0024314	Plap	43978	-1.35199	4.5e-34	Others	Others	Others	Others	Others	Others	Others	Others	Others	Others
FBgn0014023	mRpL47	41141	-1.35186	7.7e-39	Mitochondria	Others	Others	Others	Translation_mito	Others	Others	Others	Others	Others
FBgn0263120	Acsl	46068	-1.35122	4.26e-146	Mitochondria	Others	Others	Others	Others	Others	Others	Others	Others	Others
FBgn0031141	CG1304	33074	-1.35087	3.89e-42	Others	Others	Others	Others	Others	Others	Others	Others	Others	Others
FBgn0051155	Rpb7	261631	-1.35032	2.56e-09	Others	Others	Others	Others	Others	Others	Others	Others	Others	Others
FBgn0085468	ND-MWFE	5740593	-1.35031	2.39e-24	Mitochondria	Others	Others	Others	Others	ETC	Others	Others	Others	Others
FBgn0025716	Bap55	36956	-1.35019	5.04e-36	Others	Others	Others	Others	Others	Others	Others	Others	Others	Others
FBgn0250843	Prosalpha6	34359	-1.34997	3.13e-97	Others	Others	Others	Others	Others	Others	Others	Others	Others	Others
FBgn0265180	CG44245	19835749	-1.34978	6.15e-277	Others	Others	Others	Others	Others	Others	Others	Others	Others	Others
FBgn0038389	CG5516	41940	-1.34958	2e-06	Others	Others	Others	Others	Others	Others	Others	Others	Others	Others
FBgn0030029	CG15343	31765	-1.34914	4.6e-06	Others	Others	Others	Others	Others	Others	Others	Others	Others	Others
FBgn0003676	CCT1	42649	-1.34884	2.5e-152	Mitochondria	Others	Others	Others	Others	Others	Others	Others	Others	Others
FBgn0003174	pwn	44011	-1.34695	1.37e-53	Others	Others	Others	Others	Others	Others	Others	Others	Others	Others
FBgn0067629	CG33332	2768669	-1.34636	1.73e-07	Others	Others	Others	Others	Others	Others	Others	Others	Others	Others
FBgn0036839	SmydA-2	40075	-1.34471	2.89e-11	Others	Others	Others	Others	Others	Others	Others	Others	Others	Others
FBgn0032884	Pomp	35342	-1.34432	9.54e-73	Others	Others	Others	Others	Others	Others	Others	Others	Others	Others
FBgn0029649	CG4116	31291	-1.34383	2.93e-58	Others	Others	Others	Others	Others	Others	Others	Others	Others	Others
FBgn0261119	Prp19	37123	-1.34359	2.11e-51	Others	Others	Others	Others	Others	Others	Others	Others	Others	Others
FBgn0003525	stg	43466	-1.34244	1.5e-06	Others	Others	Others	Others	Others	Others	Others	Others	Others	Others
FBgn0038474	mRpS11	42061	-1.342	1.6e-29	Mitochondria	Others	Others	RNA_metabolism_mito	Translation_mito	Others	Others	Others	Others	Others
FBgn0028949	CG15254	34915	-1.34168	1.67e-30	Others	Others	Others	Others	Others	Others	Others	Others	Others	Others
FBgn0029969	CG10932	31695	-1.33813	8.01e-179	Mitochondria	Others	Others	Others	Others	Others	Others	Others	Others	Others
FBgn0283450	Glo1	35656	-1.33753	4.12e-60	Others	Others	Others	Others	Others	Others	Others	Others	Others	Others
FBgn0033584	CG7737	36174	-1.33719	2.15e-48	Others	Others	Others	Others	Others	Others	Others	Others	Others	Others
FBgn0037838	TTLL15	41300	-1.33714	9.76e-36	Others	Others	Others	Others	Others	Others	Others	Others	Others	Others
FBgn0030465	CG15743	32279	-1.33713	3.66e-50	Others	Others	Others	Others	Others	Others	Others	Others	Others	Others
FBgn0025709	CNT2	35914	-1.33621	2.08e-59	Others	Others	Others	Others	Others	Others	Others	Others	Others	Others
FBgn0000477	DNaseII	48228	-1.33571	6.88e-45	Others	Others	Others	Others	Others	Others	Others	Others	Others	Others
FBgn0033830	CG10814	36481	-1.33418	2.33e-137	Others	Others	Others	Others	Others	Others	Others	Others	Others	Others
FBgn0040075	rept	40092	-1.33414	1.02e-46	Others	Others	Others	Others	Others	Others	Others	Others	Others	Others
FBgn0035909	ergic53	44679	-1.33345	1.16e-225	Others	Others	Others	Others	Others	Others	Others	Others	Others	Others
FBgn0025781	Cdc16	42753	-1.333	1.68e-10	Others	Others	Others	Others	Others	Others	Others	Others	Others	Others
FBgn0014863	Mlp84B	40849	-1.33203	1.16e-266	Others	Others	Others	Others	Others	Others	Others	Others	Others	Others
FBgn0034576	ND-B14.7	37385	-1.33193	6.33e-95	Mitochondria	Others	Others	Others	Others	ETC	Others	Others	Others	Others
FBgn0015572	alpha-Est4	40906	-1.33101	4.55e-37	Others	Others	Others	Others	Others	Others	Others	Others	Others	Others
FBgn0032050	CG13096	34183	-1.33082	3.4e-58	Others	Others	Others	Others	Others	Others	Others	Others	Others	Others
FBgn0015379	dod	33111	-1.33071	3.28e-19	Others	Others	Others	Others	Others	Others	Others	Others	Others	Others
FBgn0001124	Got1	36782	-1.33061	5.47e-281	Mitochondria	Others	Others	Others	Others	Others	Others	Others	Others	Others
FBgn0015575	alpha-Est7	40901	-1.3293	6.07e-100	Others	Others	Others	Others	Others	Others	Others	Others	Others	Others
FBgn0035271	CG2021	38229	-1.32891	0.000210095	Others	Others	Others	Others	Others	Others	Others	Others	Others	Others
FBgn0032444	CCT4	34674	-1.32886	8.2e-135	Others	Others	Others	Others	Others	Others	Others	Others	Others	Others
FBgn0011286	RyR	49090	-1.3288	6.7e-67	Others	Others	Others	Others	Others	Others	Others	Others	Others	Others
FBgn0051957	CG31957	319046	-1.32864	2.35e-05	Others	Others	Others	Others	Others	Others	Others	Others	Others	Others
FBgn0034422	CG7137	37204	-1.32836	2.72e-12	Others	Others	Others	Others	Others	Others	Others	Others	Others	Others
FBgn0026418	Hsc70Cb	39557	-1.32829	8.78e-122	Others	Others	Others	Others	Others	Others	Others	Others	Others	Others
FBgn0028948	CG15253	34916	-1.32735	7.68e-16	Others	Others	Others	Others	Others	Others	Others	Others	Others	Others
FBgn0041164	armi	38427	-1.32656	1.6e-06	Mitochondria	Others	Others	Others	Others	Others	Others	Others	Others	Others
FBgn0034783	CG9825	37624	-1.32583	5.9e-31	Others	Others	Others	Others	Others	Others	Others	Others	Others	Others
FBgn0030837	CG8661	32720	-1.32542	1.05e-66	Others	Others	Others	Others	Others	Others	Others	Others	Others	Others
FBgn0035980	mRRF1	39067	-1.32503	1.75e-12	Mitochondria	Others	Others	Others	Translation_mito	Others	Others	Others	Others	Others
FBgn0038974	CG5377	42645	-1.32286	8.94e-15	Mitochondria	Others	Others	Others	Others	Others	Others	Others	Others	Others
FBgn0261387	CG17528	3355134	-1.32258	5.02e-50	Others	Others	Others	Others	Others	Others	Others	Others	Others	Others
FBgn0031544	CG17593	33573	-1.32228	2.92e-90	Others	Others	Others	Others	Others	Others	Others	Others	Others	Others
FBgn0034578	CG15653	37388	-1.32207	3.28e-06	Mitochondria	Others	Others	Others	Others	ETC	Others	Others	Others	Others
FBgn0035600	Cyt-c1	38612	-1.32177	0	Mitochondria	Others	Others	Others	Others	ETC	Others	Others	Others	Others
FBgn0266582	ND-30	38378	-1.32124	9.52e-87	Mitochondria	Others	Others	Others	Others	ETC	Others	Others	Others	Others
FBgn0029148	NHP2	44005	-1.31987	7.26e-44	Others	Others	Others	Others	Others	Others	Others	Others	Others	Others
FBgn0025336	CG4882	37787	-1.31972	1.94e-59	Mitochondria	Others	Others	Others	Others	Others	Others	Others	Others	Others
FBgn0040666	CG12848	50139	-1.3186	8.04e-29	Mitochondria	Others	Others	Others	Translation_mito	Others	Others	Others	Others	Others
FBgn0033526	Caf1-105	36107	-1.31835	1.6e-17	Others	Others	Others	Others	Others	Others	Others	Others	Others	Others
FBgn0040773	COX7C	50246	-1.31671	3.24e-79	Mitochondria	Others	Others	Others	Others	ETC	Others	Others	Others	Others
FBgn0037723	SpdS	41167	-1.31666	3.61e-49	Others	Others	Others	Others	Others	Others	Others	Others	Others	Others
FBgn0040634	CG4186	50107	-1.31658	0.000821248	Mitochondria	Others	Others	Others	Others	Others	Others	Others	Others	Others
FBgn0262867	Ptr	35546	-1.31457	3.48e-34	Others	Others	Others	Others	Others	Others	Others	Others	Others	Others
FBgn0266580	Gp210	35512	-1.31351	7.17e-22	Others	Others	Others	Others	Others	Others	Others	Others	Others	Others
FBgn0039765	mRpS18C	43609	-1.31329	2.55e-10	Mitochondria	Others	Others	Others	Translation_mito	Others	Others	Others	Others	Others
FBgn0034390	CG15093	37166	-1.31271	2.3e-204	Mitochondria	Others	Others	Others	Others	Others	Others	Others	Others	Others
FBgn0262559	Mdh2	42185	-1.31251	3.81e-261	Mitochondria	Others	Others	Others	Others	Others	Others	Others	TCA	Others
FBgn0028952	Kebab	48440	-1.31215	0.0280799	Others	Others	Others	Others	Others	Others	Others	Others	Others	Others
FBgn0267365	l(2)SH0834	34386	-1.31067	1.76e-10	Others	Others	Others	Others	Others	Others	Others	Others	Others	Others
FBgn0039566	CG4849	43358	-1.31028	9.16e-34	Others	Others	Others	Others	Others	Others	Others	Others	Others	Others
FBgn0035471	Sc2	38457	-1.31022	9.21e-148	Others	Others	Others	Others	Others	Others	Others	Others	Others	Others
FBgn0038964	Nop56	42633	-1.31004	9.27e-186	Others	Others	Others	Others	Others	Others	Others	Others	Others	Others
FBgn0037447	Neurochondrin	40796	-1.30938	1.85e-192	Others	Others	Others	Others	Others	Others	Others	Others	Others	Others
FBgn0037608	mRpL19	41028	-1.30907	3.21e-46	Mitochondria	Others	Others	Others	Translation_mito	Others	Others	Others	Others	Others
FBgn0036927	Gabat	40188	-1.30703	6.02e-76	Mitochondria	Others	Others	Others	Others	Others	Others	Others	Others	Others
FBgn0031149	Stt3A	33082	-1.30675	1.05e-83	Others	Others	Others	Others	Others	Others	Others	Others	Others	Others
FBgn0052669	CG32669	326229	-1.30664	1.42e-56	Others	Others	Others	Others	Others	Others	Others	Others	Others	Others
FBgn0038261	CG14856	41790	-1.30657	9.57e-14	Others	Others	Others	Others	Others	Others	Others	Others	Others	Others
FBgn0036977	CG5665	40243	-1.3056	0.0183174	Others	Others	Others	Others	Others	Others	Others	Others	Others	Others
FBgn0283427	FASN1	33524	-1.30542	0	Mitochondria	Others	Others	Others	Others	Others	Others	Others	Others	Others
FBgn0039749	CG11498	43585	-1.30499	1.5e-20	Mitochondria	Others	Others	Others	Others	Others	Others	Others	Others	Others
FBgn0039128	CG13599	42829	-1.30443	0.0136186	Others	Others	Others	Others	Others	Others	Others	Others	Others	Others
FBgn0037815	Rrp46	41270	-1.30442	2.27e-10	Others	Others	Others	Others	Others	Others	Others	Others	Others	Others
FBgn0000615	exu	37345	-1.30307	1.12e-09	Others	Others	Others	Others	Others	Others	Others	Others	Others	Others
FBgn0031247	CG11562	33200	-1.3023	9.38e-14	Mitochondria	Others	Others	Others	Others	ETC	Others	Others	Others	Others
FBgn0052174	Coq4	261607	-1.30184	5.09e-08	Mitochondria	Others	Others	Others	Others	Others	Others	Others	Others	Others
FBgn0041789	Pax	35215	-1.3013	1.89e-200	Others	Others	Others	Others	Others	Others	Others	Others	Others	Others
FBgn0030661	Alp11	32496	-1.3009	1.81e-17	Others	Others	Others	Others	Others	Others	Others	Others	Others	Others
FBgn0030683	Mvd	32520	-1.30073	3.6e-14	Others	Others	Others	Others	Others	Others	Others	Others	Others	Others
FBgn0051446	CG31446	318741	-1.3006	2.35e-22	Others	Others	Others	Others	Others	Others	Others	Others	Others	Others
FBgn0030509	CG11162	32325	-1.30058	2.47e-12	Others	Others	Others	Others	Others	Others	Others	Others	Others	Others
FBgn0002174	CG5504	48844	-1.29943	7.51e-46	Mitochondria	Others	Others	Others	Others	Others	Others	Others	Others	Others
FBgn0032298	CG6724	34488	-1.2975	4.95e-52	Others	Others	Others	Others	Others	Others	Others	Others	Others	Others
FBgn0250868	CG42239	7354422	-1.29736	3.4e-17	Others	Others	Others	Others	Others	Others	Others	Others	Others	Others
FBgn0260008	UQCR-11	5740185	-1.29719	1.17e-65	Mitochondria	Others	Others	Others	Others	ETC	Others	Others	Others	Others
FBgn0029868	ND-B16.6	31578	-1.29693	7.52e-80	Mitochondria	Others	Others	Others	Others	ETC	Others	Others	Others	Others
FBgn0035335	mRpL23	38302	-1.29521	5.77e-18	Mitochondria	Others	Others	Others	Translation_mito	Others	Others	Others	Others	Others
FBgn0037912	sea	3772221	-1.29482	6.72e-41	Mitochondria	Others	Others	Others	Others	Others	Others	Others	Others	Others
FBgn0004132	boca	48986	-1.29476	1.2e-24	Others	Others	Others	Others	Others	Others	Others	Others	Others	Others
FBgn0035532	CG15014	38533	-1.29423	6.48e-14	Others	Others	Others	Others	Others	Others	Others	Others	Others	Others
FBgn0037301	Mms19	40626	-1.29278	2.5e-27	Others	Others	Others	Others	Others	Others	Others	Others	Others	Others
FBgn0026879	CG13364	50364	-1.2927	2.54e-43	Others	Others	Others	Others	Others	Others	Others	Others	Others	Others
FBgn0034310	Nup75	37078	-1.29055	4.23e-37	Others	Others	Others	Others	Others	Others	Others	Others	Others	Others
FBgn0001187	Hex-C	44008	-1.28919	8.64e-30	Others	Others	Others	Others	Others	Others	Others	Others	Others	Others
FBgn0034956	CG4324	37830	-1.28857	1.75e-29	Others	Others	Others	Others	Others	Others	Others	Others	Others	Others
FBgn0036659	CG9701	39872	-1.28807	5.01e-90	Others	Others	Others	Others	Others	Others	Others	Others	Others	Others
FBgn0032513	CG6565	34749	-1.28799	6.07e-32	Mitochondria	Others	Others	Others	Others	Others	Others	Others	Others	Others
FBgn0086130	Dbp21E2	33254	-1.28741	2.39e-24	Mitochondria	Others	Others	Others	Others	Others	Others	Others	Others	Others
FBgn0029715	CG11444	31388	-1.28733	6.14e-63	Others	Others	Others	Others	Others	Others	Others	Others	Others	Others
FBgn0010314	Cks30A	34250	-1.28691	6.27e-06	Others	Others	Others	Others	Others	Others	Others	Others	Others	Others
FBgn0035141	Cypl	38069	-1.28677	2.87e-10	Others	Others	Others	Others	Others	Others	Others	Others	Others	Others
FBgn0036135	mRpL2	39253	-1.28592	6.36e-33	Mitochondria	Others	Others	Others	Translation_mito	Others	Others	Others	Others	Others
FBgn0032873	CG2614	35326	-1.28572	9.6e-18	Others	Others	Others	Others	Others	Others	Others	Others	Others	Others
FBgn0024183	vig	34885	-1.28553	8.46e-141	Others	Others	Others	Others	Others	Others	Others	Others	Others	Others
FBgn0259722	CG42376	7354420	-1.28474	6.64e-27	Mitochondria	Others	Others	Others	Others	Others	Others	Others	Others	Others
FBgn0035473	mge	38459	-1.28446	3.49e-136	Mitochondria	Others	Others	Others	Others	Others	Others	Protein_import_insertion_mito	Others	Others
FBgn0051561	Osi16	318801	-1.28329	7.45e-06	Others	Others	Others	Others	Others	Others	Others	Others	Others	Others
FBgn0037409	Osi24	40755	-1.28257	2.68e-22	Others	Others	Others	Others	Others	Others	Others	Others	Others	Others
FBgn0034999	Fatp3	37887	-1.28189	7.62e-15	Others	Others	Others	Others	Others	Others	Others	Others	Others	Others
FBgn0032329	Art8	34528	-1.28179	0.000583429	Others	Others	Others	Others	Others	Others	Others	Others	Others	Others
FBgn0037513	pyd3	40916	-1.28168	7.12e-22	Others	Others	Others	Others	Others	Others	Others	Others	Others	Others
FBgn0035630	CG10576	38645	-1.28121	3.09e-164	Others	Others	Others	Others	Others	Others	Others	Others	Others	Others
FBgn0262794	CG43175	12798449	-1.28016	0.00715597	Others	Others	Others	Others	Others	Others	Others	Others	Others	Others
FBgn0037778	mtTFB2	41228	-1.28003	9.62e-11	Mitochondria	Others	Transcription_mito	RNA_metabolism_mito	Others	Others	Others	Others	Others	Others
FBgn0030745	CG4239	32606	-1.27921	3.24e-80	Others	Others	Others	Others	Others	Others	Others	Others	Others	Others
FBgn0033887	St4	36548	-1.27842	1.54e-16	Others	Others	Others	Others	Others	Others	Others	Others	Others	Others
FBgn0243511	psidin	42389	-1.27825	3.3e-33	Others	Others	Others	Others	Others	Others	Others	Others	Others	Others
FBgn0039836	CG1750	43699	-1.27732	2.13e-08	Mitochondria	Others	Others	RNA_metabolism_mito	Others	Others	Others	Others	Others	Others
FBgn0038180	Cht5	41687	-1.27704	1.54e-72	Others	Others	Others	Others	Others	Others	Others	Others	Others	Others
FBgn0027537	Nup93-1	32350	-1.27563	1.7e-34	Others	Others	Others	Others	Others	Others	Others	Others	Others	Others
FBgn0001091	Gapdh1	35728	-1.27561	1.07e-174	Mitochondria	Others	Others	Others	Others	Others	Others	Others	Others	Others
FBgn0037503	CG14598	40893	-1.27451	2.53e-26	Others	Others	Others	Others	Others	Others	Others	Others	Others	Others
FBgn0031627	fipi	33676	-1.274	6.45e-06	Others	Others	Others	Others	Others	Others	Others	Others	Others	Others
FBgn0039651	Cyt-c1L	43457	-1.27383	0.0485939	Mitochondria	Others	Others	Others	Others	ETC	tsETC	Others	Others	Others
FBgn0038080	CG12279	41570	-1.27332	5.5e-11	Others	Others	Others	Others	Others	Others	Others	Others	Others	Others
FBgn0033317	CG8635	35850	-1.27193	2.62e-49	Others	Others	Others	Others	Others	Others	Others	Others	Others	Others
FBgn0003062	Fib	37662	-1.27181	5.09e-18	Others	Others	Others	Others	Others	Others	Others	Others	Others	Others
FBgn0017567	ND-23	44207	-1.27081	5.8e-85	Mitochondria	Others	Others	Others	Others	ETC	Others	Others	Others	Others
FBgn0038306	Art3	41837	-1.26915	2.88e-27	Others	Others	Others	Others	Others	Others	Others	Others	Others	Others
FBgn0022344	CG10340	42020	-1.26819	1.24e-72	Mitochondria	Others	Others	Others	Others	Others	Others	Others	Others	Others
FBgn0016684	NaPi-T	36651	-1.26803	9.29e-64	Others	Others	Others	Others	Others	Others	Others	Others	Others	Others
FBgn0035480	CG14984	38467	-1.26669	2.68e-36	Others	Others	Others	Others	Others	Others	Others	Others	Others	Others
FBgn0033730	Cpr49Ag	36353	-1.26661	8.65e-153	Others	Others	Others	Others	Others	Others	Others	Others	Others	Others
FBgn0031217	CG11377	33166	-1.26628	2.62e-42	Others	Others	Others	Others	Others	Others	Others	Others	Others	Others
FBgn0052447	CG32447	40412	-1.26536	2.26e-27	Others	Others	Others	Others	Others	Others	Others	Others	Others	Others
FBgn0030151	CG1354	31914	-1.26441	1.33e-60	Others	Others	Others	Others	Others	Others	Others	Others	Others	Others
FBgn0264922	smt3	33981	-1.26408	6.51e-83	Others	Others	Others	Others	Others	Others	Others	Others	Others	Others
FBgn0050090	CG30090	246448	-1.26402	2.16e-06	Others	Others	Others	Others	Others	Others	Others	Others	Others	Others
FBgn0036857	Aldh7A1	40097	-1.26301	5.23e-57	Mitochondria	Others	Others	Others	Others	Others	Others	Others	Others	Others
FBgn0039114	Lsd-1	42810	-1.26213	4.61e-143	Others	Others	Others	Others	Others	Others	Others	Others	Others	Others
FBgn0038662	Mpc1	42268	-1.26197	1.27e-71	Mitochondria	Others	Others	Others	Others	Others	Others	Others	Others	Others
FBgn0021761	Nup154	34527	-1.26063	7.52e-31	Others	Others	Others	Others	Others	Others	Others	Others	Others	Others
FBgn0250753	kra	40680	-1.26052	6.37e-240	Others	Others	Others	Others	Others	Others	Others	Others	Others	Others
FBgn0052483	CG32483	318050	-1.26036	3.42e-15	Others	Others	Others	Others	Others	Others	Others	Others	Others	Others
FBgn0039849	CG11334	43713	-1.26029	1.07e-95	Others	Others	Others	Others	Others	Others	Others	Others	Others	Others
FBgn0030584	CG14407	32410	-1.25881	1.9e-19	Mitochondria	Others	Others	Others	Others	Others	Others	Others	Others	Others
FBgn0000317	ck	34882	-1.25787	5.9e-21	Others	Others	Others	Others	Others	Others	Others	Others	Others	Others
FBgn0004511	dy	32130	-1.25763	3.3e-11	Others	Others	Others	Others	Others	Others	Others	Others	Others	Others
FBgn0029888	ND-ASHI	31604	-1.25689	3.76e-86	Mitochondria	Others	Others	Others	Others	ETC	Others	Others	Others	Others
FBgn0037421	CG15594	40768	-1.25505	0.0489389	Others	Others	Others	Others	Others	Others	Others	Others	Others	Others
FBgn0039450	Yif1	43217	-1.25495	4.22e-83	Others	Others	Others	Others	Others	Others	Others	Others	Others	Others
FBgn0029848	Btnd	31552	-1.25442	1.11e-18	Others	Others	Others	Others	Others	Others	Others	Others	Others	Others
FBgn0037770	Art4	41219	-1.25423	1.39e-37	Others	Others	Others	Others	Others	Others	Others	Others	Others	Others
FBgn0267385	PyK	42620	-1.25346	1.07e-156	Mitochondria	Others	Others	Others	Others	Others	Others	Others	Others	Others
FBgn0027500	spd-2	39850	-1.25322	2.41e-05	Others	Others	Others	Others	Others	Others	Others	Others	Others	Others
FBgn0033712	mIF3	36335	-1.25279	7.37e-14	Mitochondria	Others	Others	Others	Translation_mito	Others	Others	Others	Others	Others
FBgn0027548	nito	35756	-1.25254	3.83e-31	Others	Others	Others	Others	Others	Others	Others	Others	Others	Others
FBgn0260987	vtd	3354896	-1.252	5.03e-12	Others	Others	Others	Others	Others	Others	Others	Others	Others	Others
FBgn0027330	l(1)G0020	31811	-1.2514	3.72e-26	Others	Others	Others	Others	Others	Others	Others	Others	Others	Others
FBgn0051373	CG31373	318700	-1.25112	2.86e-05	Others	Others	Others	Others	Others	Others	Others	Others	Others	Others
FBgn0037602	SLIRP2	41021	-1.25109	0.0105366	Mitochondria	Others	Others	Others	Others	Others	Others	Others	Others	Others
FBgn0030786	mRpL22	32662	-1.25002	4.56e-49	Mitochondria	Others	Others	Others	Translation_mito	Others	Others	Others	Others	Others
FBgn0010339	128up	36288	-1.24922	4.17e-65	Others	Others	Others	Others	Others	Others	Others	Others	Others	Others
FBgn0035204	CG2277	38148	-1.24831	1.05e-40	Others	Others	Others	Others	Others	Others	Others	Others	Others	Others
FBgn0002789	Mp20	36468	-1.24771	0	Others	Others	Others	Others	Others	Others	Others	Others	Others	Others
FBgn0036949	CG7290	40211	-1.24702	2.64e-280	Others	Others	Others	Others	Others	Others	Others	Others	Others	Others
FBgn0051759	CG31759	326158	-1.24621	3.89e-13	Mitochondria	Others	Others	Others	Others	Others	Others	Others	Others	Others
FBgn0030005	CG2120	31737	-1.24575	2e-06	Others	Others	Others	Others	Others	Others	Others	Others	Others	Others
FBgn0085192	CG34163	5740407	-1.24541	7.44e-05	Others	Others	Others	Others	Others	Others	Others	Others	Others	Others
FBgn0031092	CG9577	33016	-1.24436	3.75e-19	Mitochondria	Others	Others	Others	Others	Others	Others	Others	Others	Others
FBgn0050016	CG30016	246393	-1.24435	0.00543075	Others	Others	Others	Others	Others	Others	Others	Others	Others	Others
FBgn0031601	Dim1	33645	-1.24424	9.81e-06	Others	Others	Others	Others	Others	Others	Others	Others	Others	Others
FBgn0011305	Rsf1	34370	-1.24322	7.31e-14	Others	Others	Others	Others	Others	Others	Others	Others	Others	Others
FBgn0030734	CG9911	32588	-1.24257	9.36e-106	Others	Others	Others	Others	Others	Others	Others	Others	Others	Others
FBgn0038319	mRpL9	41859	-1.24196	1.36e-31	Mitochondria	Others	Others	Others	Translation_mito	Others	Others	Others	Others	Others
FBgn0024997	CG2681	31258	-1.24125	2.66e-10	Others	Others	Others	Others	Others	Others	Others	Others	Others	Others
FBgn0029094	asf1	40141	-1.24073	1.23e-35	Others	Others	Others	Others	Others	Others	Others	Others	Others	Others
FBgn0039877	Mccc1	43750	-1.24032	2.73e-71	Mitochondria	Others	Others	Others	Others	Others	Others	Others	Others	Others
FBgn0039199	CG13615	42916	-1.24017	0.00818789	Others	Others	Others	Others	Others	Others	Others	Others	Others	Others
FBgn0039875	sip3	43747	-1.23885	3.77e-68	Others	Others	Others	Others	Others	Others	Others	Others	Others	Others
FBgn0261067	LSm1	37413	-1.23738	2.77e-06	Others	Others	Others	Others	Others	Others	Others	Others	Others	Others
FBgn0040899	CG17776	50373	-1.23716	2.14e-07	Others	Others	Others	Others	Others	Others	Others	Others	Others	Others
FBgn0036909	Ccdc58	40159	-1.23714	1.47e-21	Mitochondria	Others	Others	Others	Others	Others	Others	Others	Others	Others
FBgn0284436	CCT8	35882	-1.23707	2.55e-59	Others	Others	Others	Others	Others	Others	Others	Others	Others	Others
FBgn0053276	Urm1	2768949	-1.23602	0.0462533	Others	Others	Others	Others	Others	Others	Others	Others	Others	Others
FBgn0034657	LBR	37482	-1.2359	1.36e-07	Others	Others	Others	Others	Others	Others	Others	Others	Others	Others
FBgn0031937	CG13795	34049	-1.23583	1.27e-14	Others	Others	Others	Others	Others	Others	Others	Others	Others	Others
FBgn0035622	TM9SF3	38635	-1.23395	3.07e-55	Others	Others	Others	Others	Others	Others	Others	Others	Others	Others
FBgn0004584	Rrp1	33500	-1.23374	3.96e-18	Others	Others	Others	Others	Others	Others	Others	Others	Others	Others
FBgn0034861	CG9815	37710	-1.2334	0.0028572	Others	Others	Others	Others	Others	Others	Others	Others	Others	Others
FBgn0030653	CG7860	32488	-1.2327	5.28e-12	Others	Others	Others	Others	Others	Others	Others	Others	Others	Others
FBgn0038989	CG6937	42662	-1.23244	8.58e-22	Others	Others	Others	Others	Others	Others	Others	Others	Others	Others
FBgn0027329	CCT6	32518	-1.23219	1.22e-153	Others	Others	Others	Others	Others	Others	Others	Others	Others	Others
FBgn0030519	CG11151	32335	-1.23195	5.11e-66	Others	Others	Others	Others	Others	Others	Others	Others	Others	Others
FBgn0039233	CG7006	42963	-1.23178	1.42e-23	Others	Others	Others	Others	Others	Others	Others	Others	Others	Others
FBgn0039909	ND-49	43798	-1.23152	2.55e-166	Mitochondria	Others	Others	Others	Others	ETC	Others	Others	Others	Others
FBgn0031832	CG9596	33920	-1.22997	4.27e-10	Others	Others	Others	Others	Others	Others	Others	Others	Others	Others
FBgn0086856	CG11555	33193	-1.2296	1.56e-12	Others	Others	Others	Others	Others	Others	Others	Others	Others	Others
FBgn0261933	SmD1	44668	-1.22913	6.24e-09	Others	Others	Others	Others	Others	Others	Others	Others	Others	Others
FBgn0052373	CG32373	318000	-1.22874	7.29e-36	Others	Others	Others	Others	Others	Others	Others	Others	Others	Others
FBgn0036157	CG7560	39276	-1.22858	0.000681192	Others	Others	Others	Others	Others	Others	Others	Others	Others	Others
FBgn0021768	nudC	39879	-1.22805	1.75e-39	Others	Others	Others	Others	Others	Others	Others	Others	Others	Others
FBgn0037842	CG6567	41304	-1.22797	1.16e-43	Others	Others	Others	Others	Others	Others	Others	Others	Others	Others
FBgn0031830	COX5B	33918	-1.22763	9.2e-148	Mitochondria	Others	Others	Others	Others	ETC	Others	Others	Others	Others
FBgn0037371	Sym	40709	-1.22742	5.41e-15	Others	Others	Others	Others	Others	Others	Others	Others	Others	Others
FBgn0036565	CG5235	39758	-1.22706	4.11e-05	Others	Others	Others	Others	Others	Others	Others	Others	Others	Others
FBgn0031822	Phf5a	33909	-1.22614	8.35e-13	Others	Others	Others	Others	Others	Others	Others	Others	Others	Others
FBgn0028692	Rpn2	43449	-1.22516	2.89e-86	Others	Others	Others	Others	Others	Others	Others	Others	Others	Others
FBgn0036998	CG5969	40269	-1.22376	1.92e-36	Others	Others	Others	Others	Others	Others	Others	Others	Others	Others
FBgn0037890	CG17734	41359	-1.2237	7.05e-77	Mitochondria	Others	Others	Others	Others	Others	Others	Others	Others	Others
FBgn0003721	Tm1	41852	-1.22364	0	Mitochondria	Others	Others	Others	Others	Others	Others	Others	Others	Others
FBgn0030871	CG8142	32763	-1.22311	2.07e-08	Others	Others	Others	Others	Others	Others	Others	Others	Others	Others
FBgn0010287	Trf	34102	-1.22257	2.67e-07	Others	Others	Others	Others	Others	Others	Others	Others	Others	Others
FBgn0030552	mRpL38	32375	-1.22187	1.52e-51	Mitochondria	Others	Others	Others	Translation_mito	Others	Others	Others	Others	Others
FBgn0035670	CG10472	38688	-1.22163	4.57e-99	Others	Others	Others	Others	Others	Others	Others	Others	Others	Others
FBgn0260407	mRpS23	318977	-1.22087	2.45e-16	Mitochondria	Others	Others	Others	Translation_mito	Others	Others	Others	Others	Others
FBgn0027359	Tim8	32081	-1.22072	3.18e-24	Mitochondria	Others	Others	Others	Others	Others	Others	Protein_import_insertion_mito	Others	Others
FBgn0036277	CG10418	39408	-1.21973	1.53e-05	Others	Others	Others	Others	Others	Others	Others	Others	Others	Others
FBgn0025352	Mtpbeta	37784	-1.21959	2.22e-108	Mitochondria	Others	Others	Others	Others	Others	Others	Others	Others	Others
FBgn0026143	Cdc45	31052	-1.21958	9.05e-21	Others	Others	Others	Others	Others	Others	Others	Others	Others	Others
FBgn0001248	Idh	44291	-1.21822	3.74e-255	Mitochondria	Others	Others	Others	Others	Others	Others	Others	Others	Others
FBgn0003567	su(Hw)	41740	-1.21804	6.45e-26	Others	Others	Others	Others	Others	Others	Others	Others	Others	Others
FBgn0000404	CycA	39340	-1.217	4.41e-16	Others	Others	Others	Others	Others	Others	Others	Others	Others	Others
FBgn0039861	pasha	43728	-1.21694	3.31e-10	Others	Others	Others	Others	Others	Others	Others	Others	Others	Others
FBgn0035192	galene	38133	-1.2163	3.05e-20	Others	Others	Others	Others	Others	Others	Others	Others	Others	Others
FBgn0026373	RpII33	34796	-1.21621	4.71e-11	Others	Others	Others	Others	Others	Others	Others	Others	Others	Others
FBgn0039357	CG4743	43101	-1.21615	2.14e-12	Mitochondria	Others	Others	Others	Others	Others	Others	Others	Others	Others
FBgn0050094	CG30094	246452	-1.21518	0.0036829	Others	Others	Others	Others	Others	Others	Others	Others	Others	Others
FBgn0040060	yip7	38680	-1.21497	2.83e-165	Others	Others	Others	Others	Others	Others	Others	Others	Others	Others
FBgn0000137	ase	30985	-1.21411	0.000628166	Others	Others	Others	Others	Others	Others	Others	Others	Others	Others
FBgn0027588	GCS2alpha	49953	-1.21299	1.03e-117	Others	Others	Others	Others	Others	Others	Others	Others	Others	Others
FBgn0029161	slmo	44132	-1.2128	4.59e-10	Mitochondria	Others	Others	Others	Others	Others	Others	Others	Others	Others
FBgn0027496	epsilonCOP	33908	-1.21227	1.68e-57	Others	Others	Others	Others	Others	Others	Others	Others	Others	Others
FBgn0033891	CG8067	36552	-1.21119	7.54e-13	Mitochondria	Others	Others	Others	Others	Others	Others	Others	Others	Others
FBgn0069242	eca	41177	-1.21093	4.45e-35	Others	Others	Others	Others	Others	Others	Others	Others	Others	Others
FBgn0041147	ida	45574	-1.21045	6.46e-12	Others	Others	Others	Others	Others	Others	Others	Others	Others	Others
FBgn0035918	Cdc6	38989	-1.20844	4.3e-10	Others	Others	Others	Others	Others	Others	Others	Others	Others	Others
FBgn0019644	ATPsynB	39143	-1.2077	1.33e-155	Mitochondria	Others	Others	Others	Others	ETC	Others	Others	Others	Others
FBgn0038977	CG5376	42648	-1.20649	1.88e-12	Others	Others	Others	Others	Others	Others	Others	Others	Others	Others
FBgn0020445	E23	43895	-1.20618	1.04e-16	Others	Others	Others	Others	Others	Others	Others	Others	Others	Others
FBgn0034661	tpr	37486	-1.20604	4.6e-47	Others	Others	Others	Others	Others	Others	Others	Others	Others	Others
FBgn0002962	nos	42297	-1.20577	0.00196641	Others	Others	Others	Others	Others	Others	Others	Others	Others	Others
FBgn0022942	Cbp80	44409	-1.20443	1.29e-25	Others	Others	Others	Others	Others	Others	Others	Others	Others	Others
FBgn0027570	Nep2	40588	-1.20439	1e-137	Others	Others	Others	Others	Others	Others	Others	Others	Others	Others
FBgn0085229	CG34200	5740389	-1.20233	0.000256072	Others	Others	Others	Others	Others	Others	Others	Others	Others	Others
FBgn0011555	thetaTry	36218	-1.2017	1.29e-172	Others	Others	Others	Others	Others	Others	Others	Others	Others	Others
FBgn0035886	Jon66Ci	38952	-1.20139	5.74e-154	Others	Others	Others	Others	Others	Others	Others	Others	Others	Others
FBgn0038721	subdued	42340	-1.19909	3.76e-24	Others	Others	Others	Others	Others	Others	Others	Others	Others	Others
FBgn0033901	O-fut1	36564	-1.19864	9.51e-09	Others	Others	Others	Others	Others	Others	Others	Others	Others	Others
FBgn0004169	up	32314	-1.19809	1.98e-226	Others	Others	Others	Others	Others	Others	Others	Others	Others	Others
FBgn0026079	Nsun2	45064	-1.19757	7.18e-30	Others	Others	Others	Others	Others	Others	Others	Others	Others	Others
FBgn0086695	hd	40642	-1.19726	1.64e-07	Others	Others	Others	Others	Others	Others	Others	Others	Others	Others
FBgn0032101	CG9586	34241	-1.19706	2.2e-20	Others	Others	Others	Others	Others	Others	Others	Others	Others	Others
FBgn0011770	Gip	31960	-1.19559	1.56e-47	Others	Others	Others	Others	Others	Others	Others	Others	Others	Others
FBgn0010424	TpnC73F	39916	-1.19454	8.89e-133	Others	Others	Others	Others	Others	Others	Others	Others	Others	Others
FBgn0035090	CG2736	37998	-1.19418	6.2e-57	Others	Others	Others	Others	Others	Others	Others	Others	Others	Others
FBgn0028968	gammaCOP	43717	-1.1937	4e-80	Others	Others	Others	Others	Others	Others	Others	Others	Others	Others
FBgn0020235	ATPsyngamma	43507	-1.19345	4.28e-190	Mitochondria	Others	Others	Others	Others	ETC	Others	Others	Others	Others
FBgn0038943	CG5391	42611	-1.19183	1.35e-12	Others	Others	Others	Others	Others	Others	Others	Others	Others	Others
FBgn0039404	CG14543	43167	-1.19163	1.59e-07	Others	Others	Others	Others	Others	Others	Others	Others	Others	Others
FBgn0035370	Non2	38341	-1.19153	1.76e-78	Others	Others	Others	Others	Others	Others	Others	Others	Others	Others
FBgn0037728	p23	41173	-1.19152	4.2e-116	Others	Others	Others	Others	Others	Others	Others	Others	Others	Others
FBgn0030853	ND-24	32740	-1.19114	5.22e-143	Mitochondria	Others	Others	Others	Others	ETC	Others	Others	Others	Others
FBgn0051560	CG31560	40772	-1.19106	2.45e-10	Others	Others	Others	Others	Others	Others	Others	Others	Others	Others
FBgn0037433	CG17919	40780	-1.19048	2.77e-22	Others	Others	Others	Others	Others	Others	Others	Others	Others	Others
FBgn0036272	Sms	39403	-1.19044	1e-54	Others	Others	Others	Others	Others	Others	Others	Others	Others	Others
FBgn0010438	mtSSB	41968	-1.19023	1.17e-08	Mitochondria	mtDNA_replication	Others	Others	Others	Others	Others	Others	Others	Others
FBgn0024983	CG4293	31001	-1.18993	1.26e-32	Others	Others	Others	Others	Others	Others	Others	Others	Others	Others
FBgn0036662	CG9706	39876	-1.18983	1.66e-25	Others	Others	Others	Others	Others	Others	Others	Others	Others	Others
FBgn0037958	CG6962	41436	-1.18973	3.73e-17	Others	Others	Others	Others	Others	Others	Others	Others	Others	Others
FBgn0040890	ksh	50363	-1.18969	3.57e-07	Others	Others	Others	Others	Others	Others	Others	Others	Others	Others
FBgn0033989	CG7639	36675	-1.18914	1.32e-67	Mitochondria	Others	Others	Others	Others	Others	Others	Others	Others	Others
FBgn0016697	Prosalpha5	36951	-1.18904	1.61e-59	Others	Others	Others	Others	Others	Others	Others	Others	Others	Others
FBgn0030305	Uba5	32094	-1.18828	4.04e-35	Others	Others	Others	Others	Others	Others	Others	Others	Others	Others
FBgn0262366	CG43064	12798207	-1.18813	6.01e-07	Others	Others	Others	Others	Others	Others	Others	Others	Others	Others
FBgn0036918	Pfdn6	40176	-1.18811	5.28e-17	Others	Others	Others	Others	Others	Others	Others	Others	Others	Others
FBgn0039301	Nup37	43040	-1.18805	2.24e-06	Others	Others	Others	Others	Others	Others	Others	Others	Others	Others
FBgn0260962	pic	41611	-1.18774	1.35e-27	Others	Others	Others	Others	Others	Others	Others	Others	Others	Others
FBgn0004419	me31B	34364	-1.18759	1.7e-63	Others	Others	Others	Others	Others	Others	Others	Others	Others	Others
FBgn0028872	CG18095	34823	-1.1871	2.5e-07	Others	Others	Others	Others	Others	Others	Others	Others	Others	Others
FBgn0265274	Inx3	44266	-1.18589	5.58e-89	Others	Others	Others	Others	Others	Others	Others	Others	Others	Others
FBgn0034045	CG8249	36742	-1.1857	3.67e-22	Others	Others	Others	Others	Others	Others	Others	Others	Others	Others
FBgn0033458	Lime	36023	-1.18568	8.41e-08	Others	Others	Others	Others	Others	Others	Others	Others	Others	Others
FBgn0001092	Gapdh2	32545	-1.18566	4.72e-298	Mitochondria	Others	Others	Others	Others	Others	Others	Others	Others	Others
FBgn0033766	Nup188	36397	-1.18483	4.72e-11	Others	Others	Others	Others	Others	Others	Others	Others	Others	Others
FBgn0011768	Fdh	41311	-1.18373	3.66e-67	Others	Others	Others	Others	Others	Others	Others	Others	Others	Others
FBgn0039311	CG10513	43051	-1.18335	8.53e-121	Others	Others	Others	Others	Others	Others	Others	Others	Others	Others
FBgn0034940	CG16787	37811	-1.18284	1.43e-11	Mitochondria	Others	Others	Others	Others	Others	Others	Others	Others	Others
FBgn0260750	Mulk	326168	-1.18275	3.02e-39	Mitochondria	Others	Others	Others	Others	Others	Others	Others	Others	Others
FBgn0034982	Naa35	37866	-1.18265	1.91e-28	Others	Others	Others	Others	Others	Others	Others	Others	Others	Others
FBgn0026718	Agpat2	34176	-1.18218	3.7e-86	Others	Others	Others	Others	Others	Others	Others	Others	Others	Others
FBgn0038924	CG6028	42589	-1.18154	1.81e-87	Mitochondria	Others	Others	Others	Others	Others	Others	Others	Others	Others
FBgn0036696	Pop5	39915	-1.18142	1.3e-11	Others	Others	Others	Others	Others	Others	Others	Others	Others	Others
FBgn0015282	Rpt2	42828	-1.18029	6.14e-89	Others	Others	Others	Others	Others	Others	Others	Others	Others	Others
FBgn0032780	CG13085	35219	-1.18007	0.0121747	Others	Others	Others	Others	Others	Others	Others	Others	Others	Others
FBgn0032715	CG17597	35140	-1.17783	5.62e-88	Mitochondria	Others	Others	Others	Others	Others	Others	Others	Others	Others
FBgn0024994	Ugalt	31255	-1.17721	5.33e-38	Others	Others	Others	Others	Others	Others	Others	Others	Others	Others
FBgn0031020	Naa15-16	32934	-1.1761	2.39e-65	Others	Others	Others	Others	Others	Others	Others	Others	Others	Others
FBgn0052448	CG32448	318032	-1.17583	0.00248917	Others	Others	Others	Others	Others	Others	Others	Others	Others	Others
FBgn0030208	PPP4R2r	31979	-1.17551	7.04e-23	Others	Others	Others	Others	Others	Others	Others	Others	Others	Others
FBgn0036574	elg1	39770	-1.17431	2.98e-06	Others	Others	Others	Others	Others	Others	Others	Others	Others	Others
FBgn0027093	ArgRS	32539	-1.17252	6.27e-68	Mitochondria	Others	Others	RNA_metabolism_mito	Others	Others	Others	Others	Others	Others
FBgn0038829	CG17271	42463	-1.17146	3.25e-110	Others	Others	Others	Others	Others	Others	Others	Others	Others	Others
FBgn0027524	CG3909	41226	-1.17115	5.59e-23	Others	Others	Others	Others	Others	Others	Others	Others	Others	Others
FBgn0019957	ND-42	42591	-1.16985	4.46e-148	Mitochondria	Others	Others	Others	Others	ETC	Others	Others	Others	Others
FBgn0033808	CG4627	36457	-1.16982	3.61e-10	Mitochondria	Others	Others	Others	Others	Others	Others	Others	Others	Others
FBgn0051559	CG31559	40749	-1.16939	7.89e-19	Others	Others	Others	Others	Others	Others	Others	Others	Others	Others
FBgn0027291	Idh3a	32940	-1.1684	4.77e-157	Mitochondria	Others	Others	Others	Others	Others	Others	Others	TCA	Others
FBgn0038485	CG5255	42073	-1.16801	1.76e-06	Others	Others	Others	Others	Others	Others	Others	Others	Others	Others
FBgn0035593	CG4603	38603	-1.16768	8.81e-34	Others	Others	Others	Others	Others	Others	Others	Others	Others	Others
FBgn0039259	EMC6	42992	-1.16714	2.77e-18	Others	Others	Others	Others	Others	Others	Others	Others	Others	Others
FBgn0036953	CG17145	40215	-1.1667	2.3e-69	Others	Others	Others	Others	Others	Others	Others	Others	Others	Others
FBgn0021765	scu	32789	-1.16637	4.29e-101	Mitochondria	Others	Others	RNA_metabolism_mito	Translation_mito	Others	Others	Others	Others	Others
FBgn0039241	CG11089	42973	-1.16615	9.91e-23	Mitochondria	Others	Others	Others	Others	Others	Others	Others	Others	Others
FBgn0039736	CG7912	43561	-1.16507	1.64e-09	Others	Others	Others	Others	Others	Others	Others	Others	Others	Others
FBgn0034784	CG9826	37625	-1.16449	4.17e-18	Others	Others	Others	Others	Others	Others	Others	Others	Others	Others
FBgn0032283	CG7296	34469	-1.16313	3.24e-45	Others	Others	Others	Others	Others	Others	Others	Others	Others	Others
FBgn0020305	dbe	33269	-1.16279	7.19e-29	Others	Others	Others	Others	Others	Others	Others	Others	Others	Others
FBgn0086895	pea	36561	-1.16251	3.86e-13	Others	Others	Others	Others	Others	Others	Others	Others	Others	Others
FBgn0261674	CG42709	39453	-1.16247	3.66e-38	Others	Others	Others	Others	Others	Others	Others	Others	Others	Others
FBgn0267348	LanB2	39118	-1.16175	1.33e-79	Others	Others	Others	Others	Others	Others	Others	Others	Others	Others
FBgn0002772	Mlc1	43323	-1.16146	3.41e-200	Others	Others	Others	Others	Others	Others	Others	Others	Others	Others
FBgn0034804	CG3831	37648	-1.1611	1.43e-05	Others	Others	Others	Others	Others	Others	Others	Others	Others	Others
FBgn0020370	TppII	36444	-1.16098	5.97e-52	Others	Others	Others	Others	Others	Others	Others	Others	Others	Others
FBgn0035272	mRpL46	38230	-1.16074	2.71e-25	Mitochondria	Others	Others	Others	Translation_mito	Others	Others	Others	Others	Others
FBgn0028554	x16	33967	-1.16069	2.42e-08	Others	Others	Others	Others	Others	Others	Others	Others	Others	Others
FBgn0028646	aralar1	43616	-1.16069	6.99e-110	Mitochondria	Others	Others	Others	Others	Others	Others	Others	Others	Others
FBgn0031776	Pfdn1	33857	-1.15938	1.98e-11	Others	Others	Others	Others	Others	Others	Others	Others	Others	Others
FBgn0039180	CG5715	42895	-1.15932	5.24e-27	Others	Others	Others	Others	Others	Others	Others	Others	Others	Others
FBgn0053966	CG33966	3885642	-1.15897	4.34e-28	Others	Others	Others	Others	Others	Others	Others	Others	Others	Others
FBgn0039303	CG11857	43042	-1.15803	4.76e-90	Others	Others	Others	Others	Others	Others	Others	Others	Others	Others
FBgn0034860	CG9812	37709	-1.15777	6.63e-97	Others	Others	Others	Others	Others	Others	Others	Others	Others	Others
FBgn0266581	pit	42595	-1.15775	2.51e-37	Others	Others	Others	Others	Others	Others	Others	Others	Others	Others
FBgn0261789	SmD2	40781	-1.15658	2.36e-20	Others	Others	Others	Others	Others	Others	Others	Others	Others	Others
FBgn0036282	Smyd4-2	39414	-1.15654	4.6e-27	Others	Others	Others	Others	Others	Others	Others	Others	Others	Others
FBgn0032285	CG17108	34471	-1.15645	0.000195673	Others	Others	Others	Others	Others	Others	Others	Others	Others	Others
FBgn0038290	CG6912	41820	-1.15546	1.87e-64	Others	Others	Others	Others	Others	Others	Others	Others	Others	Others
FBgn0040751	CG13018	50224	-1.15526	0.0244277	Mitochondria	Others	Others	Others	Others	Others	Others	Others	Others	Others
FBgn0036301	CG4069	39437	-1.15516	2.77e-11	Others	Others	Others	Others	Others	Others	Others	Others	Others	Others
FBgn0031684	ND-13A	33744	-1.15452	1.39e-29	Mitochondria	Others	Others	Others	Others	ETC	Others	Others	Others	Others
FBgn0052576	CG32576	318095	-1.15403	1.74e-20	Others	Others	Others	Others	Others	Others	Others	Others	Others	Others
FBgn0267330	KdelR	34427	-1.15303	1.11e-97	Others	Others	Others	Others	Others	Others	Others	Others	Others	Others
FBgn0031373	CG15358	33366	-1.15223	0.0248559	Others	Others	Others	Others	Others	Others	Others	Others	Others	Others
FBgn0033688	Prp8	36304	-1.15076	2.03e-47	Others	Others	Others	Others	Others	Others	Others	Others	Others	Others
FBgn0043002	Chrac-14	3772329	-1.15065	4.19e-05	Others	Others	Others	Others	Others	Others	Others	Others	Others	Others
FBgn0027835	Dp1	37116	-1.15043	3.45e-84	Others	Others	Others	Others	Others	Others	Others	Others	Others	Others
FBgn0038654	CG14298	42259	-1.15037	8.95e-06	Others	Others	Others	Others	Others	Others	Others	Others	Others	Others
FBgn0262574	CG43114	12798406	-1.15004	0.0158588	Others	Others	Others	Others	Others	Others	Others	Others	Others	Others
FBgn0034986	mRpS17	37872	-1.14972	2.77e-17	Mitochondria	Others	Others	Others	Translation_mito	Others	Others	Others	Others	Others
FBgn0051812	Tsen2	318956	-1.14963	5.73e-05	Others	Others	Others	Others	Others	Others	Others	Others	Others	Others
FBgn0035336	CG9004	38303	-1.1477	1.98e-10	Others	Others	Others	Others	Others	Others	Others	Others	Others	Others
FBgn0028945	CG7631	34919	-1.14698	5.76e-14	Others	Others	Others	Others	Others	Others	Others	Others	Others	Others
FBgn0014903	CG14630	44620	-1.14626	1.05e-12	Mitochondria	Others	Others	RNA_metabolism_mito	Others	Others	Others	Others	Others	Others
FBgn0035771	Sec63	38819	-1.14532	9.84e-64	Others	Others	Others	Others	Others	Others	Others	Others	Others	Others
FBgn0028693	Rpn12	39845	-1.14505	1.86e-38	Others	Others	Others	Others	Others	Others	Others	Others	Others	Others
FBgn0037678	CG16749	41111	-1.14492	6.96e-39	Others	Others	Others	Others	Others	Others	Others	Others	Others	Others
FBgn0263999	CG43742	14462622	-1.14434	3.07e-32	Others	Others	Others	Others	Others	Others	Others	Others	Others	Others
FBgn0036184	PCID2	39306	-1.14432	4.54e-09	Others	Others	Others	Others	Others	Others	Others	Others	Others	Others
FBgn0036035	CG18178	39138	-1.14361	1.37e-23	Others	Others	Others	Others	Others	Others	Others	Others	Others	Others
FBgn0261385	scra	35696	-1.14335	8.83e-06	Others	Others	Others	Others	Others	Others	Others	Others	Others	Others
FBgn0038922	Idh3b	42586	-1.14097	1.54e-100	Mitochondria	Others	Others	Others	Others	Others	Others	Others	TCA	Others
FBgn0034299	CG5757	37062	-1.14049	2.16e-10	Mitochondria	Others	Others	Others	Others	Others	Others	Others	Others	Others
FBgn0053519	Unc-89	3346201	-1.14022	1.65e-54	Others	Others	Others	Others	Others	Others	Others	Others	Others	Others
FBgn0033468	CG1418	36035	-1.14014	9.87e-41	Others	Others	Others	Others	Others	Others	Others	Others	Others	Others
FBgn0035203	CG9149	38147	-1.13966	4.52e-42	Mitochondria	Others	Others	Others	Others	Others	Others	Others	Others	Others
FBgn0005666	bt	43814	-1.13959	4.85e-204	Others	Others	Others	Others	Others	Others	Others	Others	Others	Others
FBgn0023519	mRpL16	31150	-1.1393	4.75e-38	Mitochondria	Others	Others	Others	Translation_mito	Others	Others	Others	Others	Others
FBgn0029117	Surf1	44498	-1.13897	3e-10	Mitochondria	Others	Others	Others	Others	Others	Others	Others	Others	Others
FBgn0039069	CG6763	42754	-1.13882	9.62e-20	Others	Others	Others	Others	Others	Others	Others	Others	Others	Others
FBgn0024352	Stip1	33202	-1.1388	9.23e-106	Others	Others	Others	Others	Others	Others	Others	Others	Others	Others
FBgn0000454	Dip-B	48450	-1.13708	4.74e-88	Others	Others	Others	Others	Others	Others	Others	Others	Others	Others
FBgn0024733	RpL10	43864	-1.13604	1.77e-181	Others	Others	Others	Others	Others	Others	Others	Others	Others	Others
FBgn0039358	CG5028	43102	-1.13482	1.54e-151	Mitochondria	Others	Others	Others	Others	Others	Others	Others	TCA	Others
FBgn0031227	CG3709	33178	-1.1338	2.82e-09	Others	Others	Others	Others	Others	Others	Others	Others	Others	Others
FBgn0015019	CCT3	42029	-1.13375	1.66e-75	Others	Others	Others	Others	Others	Others	Others	Others	Others	Others
FBgn0020279	lig	35771	-1.13361	1.73e-64	Others	Others	Others	Others	Others	Others	Others	Others	Others	Others
FBgn0035947	Srp68	39028	-1.1331	8.4e-78	Others	Others	Others	Others	Others	Others	Others	Others	Others	Others
FBgn0000588	esc	34595	-1.13175	3.96e-06	Others	Others	Others	Others	Others	Others	Others	Others	Others	Others
FBgn0037427	Osi17	40774	-1.13159	2.78e-12	Others	Others	Others	Others	Others	Others	Others	Others	Others	Others
FBgn0042185	MCU	59223	-1.13116	5.62e-50	Mitochondria	Others	Others	Others	Others	Others	Others	Others	Others	Others
FBgn0002526	LanA	38723	-1.13115	4.27e-99	Others	Others	Others	Others	Others	Others	Others	Others	Others	Others
FBgn0033005	CG3107	35475	-1.13057	1.81e-34	Mitochondria	Others	Others	Others	Others	Others	Others	Others	Others	Others
FBgn0010015	CanA1	43670	-1.13041	1.27e-18	Others	Others	Others	Others	Others	Others	Others	Others	Others	Others
FBgn0024188	san	44724	-1.1301	2.55e-23	Others	Others	Others	Others	Others	Others	Others	Others	Others	Others
FBgn0038467	AdSL	42051	-1.12877	1.28e-53	Mitochondria	Others	Others	Others	Others	Others	Others	Others	Others	Others
FBgn0038858	CG5793	42505	-1.1283	2.73e-28	Mitochondria	Others	Others	Others	Others	Others	Others	Others	Others	Others
FBgn0050410	Rpi	246599	-1.1283	2.98e-53	Others	Others	Others	Others	Others	Others	Others	Others	Others	Others
FBgn0053977	CG33977	3885575	-1.12698	0.000512203	Others	Others	Others	Others	Others	Others	Others	Others	Others	Others
FBgn0035872	Cpsf6	38937	-1.1268	3.41e-33	Others	Others	Others	Others	Others	Others	Others	Others	Others	Others
FBgn0034495	CG11788	37295	-1.12654	1.42e-07	Others	Others	Others	Others	Others	Others	Others	Others	Others	Others
FBgn0038585	Non3	42183	-1.12651	3.07e-23	Others	Others	Others	Others	Others	Others	Others	Others	Others	Others
FBgn0039111	PTPMT1	42807	-1.12619	3.15e-25	Mitochondria	Others	Others	Others	Others	Others	Others	Others	Others	Others
FBgn0001983	wor	34906	-1.12595	0.0021874	Others	Others	Others	Others	Others	Others	Others	Others	Others	Others
FBgn0033339	Sec31	35877	-1.1258	2.12e-52	Others	Others	Others	Others	Others	Others	Others	Others	Others	Others
FBgn0036688	Fit2	39907	-1.12527	2.42e-23	Others	Others	Others	Others	Others	Others	Others	Others	Others	Others
FBgn0025684	MFS18	33650	-1.12503	1.91e-28	Others	Others	Others	Others	Others	Others	Others	Others	Others	Others
FBgn0037891	CG5214	41360	-1.12464	3.96e-149	Mitochondria	Others	Others	Others	Others	Others	Others	Others	TCA	Others
FBgn0036479	CG13458	39646	-1.12437	2.26e-07	Others	Others	Others	Others	Others	Others	Others	Others	Others	Others
FBgn0267823	Gmer	37638	-1.12416	3.06e-20	Others	Others	Others	Others	Others	Others	Others	Others	Others	Others
FBgn0029529	CG13365	31005	-1.12412	7.77e-10	Others	Others	Others	Others	Others	Others	Others	Others	Others	Others
FBgn0261955	kdn	31579	-1.12395	2.39e-183	Mitochondria	Others	Others	Others	Others	Others	Others	Others	TCA	Others
FBgn0030007	alpha-PheRS	31740	-1.12388	7.31e-93	Others	Others	Others	Others	Others	Others	Others	Others	Others	Others
FBgn0052069	CG32069	39235	-1.12358	0.000201999	Others	Others	Others	Others	Others	Others	Others	Others	Others	Others
FBgn0039868	CG11563	43735	-1.12276	4e-14	Others	Others	Others	Others	Others	Others	Others	Others	Others	Others
FBgn0038046	CG5641	41529	-1.12269	1.53e-20	Others	Others	Others	Others	Others	Others	Others	Others	Others	Others
FBgn0002878	mus101	48309	-1.12156	0.00272856	Others	Others	Others	Others	Others	Others	Others	Others	Others	Others
FBgn0040398	CG14629	31055	-1.12155	2.25e-79	Others	Others	Others	Others	Others	Others	Others	Others	Others	Others
FBgn0260771	Larp7	44900	-1.12155	4.27e-10	Others	Others	Others	Others	Others	Others	Others	Others	Others	Others
FBgn0038045	NANS	41528	-1.12067	0.0275486	Others	Others	Others	Others	Others	Others	Others	Others	Others	Others
FBgn0261850	Xpd	37414	-1.12022	2.89e-19	Others	Others	Others	Others	Others	Others	Others	Others	Others	Others
FBgn0039294	Cad96Cb	43033	-1.11994	4.59e-05	Others	Others	Others	Others	Others	Others	Others	Others	Others	Others
FBgn0037121	Rpb8	40415	-1.11951	4.21e-12	Others	Others	Others	Others	Others	Others	Others	Others	Others	Others
FBgn0030060	CG2004	31809	-1.11912	1.11e-77	Others	Others	Others	Others	Others	Others	Others	Others	Others	Others
FBgn0265089	eIF4E3	38923	-1.11826	9.11e-06	Others	Others	Others	Others	Others	Others	Others	Others	Others	Others
FBgn0283471	wupA	32794	-1.11747	7.53e-233	Others	Others	Others	Others	Others	Others	Others	Others	Others	Others
FBgn0035679	CG10467	38697	-1.11672	3.04e-17	Others	Others	Others	Others	Others	Others	Others	Others	Others	Others
FBgn0029858	mldr	31568	-1.11663	0.000207466	Mitochondria	Others	Others	RNA_metabolism_mito	Translation_mito	Others	Others	Others	Others	Others
FBgn0265991	Zasp52	36740	-1.11661	3.26e-181	Others	Others	Others	Others	Others	Others	Others	Others	Others	Others
FBgn0000115	Arl1	39745	-1.1143	7.2e-19	Others	Others	Others	Others	Others	Others	Others	Others	Others	Others
FBgn0020385	pug	41279	-1.11303	4.61e-43	Mitochondria	Others	Others	Others	Others	Others	Others	Others	Others	Others
FBgn0030545	CG11590	32368	-1.11238	1.23e-05	Others	Others	Others	Others	Others	Others	Others	Others	Others	Others
FBgn0028426	RNaseZ	36086	-1.11203	2.87e-22	Mitochondria	Others	Others	RNA_metabolism_mito	Others	Others	Others	Others	Others	Others
FBgn0026479	Drp1	33445	-1.11061	1.47e-45	Mitochondria	Others	Others	Others	Others	Others	Others	Others	Others	Others
FBgn0030943	Nup35	32851	-1.11019	2.62e-28	Others	Others	Others	Others	Others	Others	Others	Others	Others	Others
FBgn0037911	CG10898	41384	-1.10871	3.98e-68	Others	Others	Others	Others	Others	Others	Others	Others	Others	Others
FBgn0027084	LysRS	31904	-1.10859	2.37e-55	Mitochondria	Others	Others	RNA_metabolism_mito	Others	Others	Others	Others	Others	Others
FBgn0037372	CG2091	40711	-1.10795	3.94e-17	Others	Others	Others	Others	Others	Others	Others	Others	Others	Others
FBgn0000566	Eip55E	37143	-1.10735	8.18e-101	Others	Others	Others	Others	Others	Others	Others	Others	Others	Others
FBgn0025725	alphaCOP	38199	-1.10642	1.55e-63	Mitochondria	Others	Others	Others	Others	Others	Others	Others	Others	Others
FBgn0014366	noi	40678	-1.10639	7.59e-23	Others	Others	Others	Others	Others	Others	Others	Others	Others	Others
FBgn0040347	mus81	31044	-1.10602	0.0014145	Others	Others	Others	Others	Others	Others	Others	Others	Others	Others
FBgn0027582	CG6230	34546	-1.10376	1.31e-50	Others	Others	Others	Others	Others	Others	Others	Others	Others	Others
FBgn0028734	Fmr1	37528	-1.10334	6.69e-50	Others	Others	Others	Others	Others	Others	Others	Others	Others	Others
FBgn0004362	HmgD	37481	-1.10164	2.09e-74	Others	Others	Others	Others	Others	Others	Others	Others	Others	Others
FBgn0033968	hui	36648	-1.10145	3.14e-166	Others	Others	Others	Others	Others	Others	Others	Others	Others	Others
FBgn0004117	Tm2	41853	-1.1013	1.46e-234	Others	Others	Others	Others	Others	Others	Others	Others	Others	Others
FBgn0036279	Ncc69	39410	-1.09955	1.91e-25	Others	Others	Others	Others	Others	Others	Others	Others	Others	Others
FBgn0027841	CstF64	42239	-1.09881	1.35e-14	Others	Others	Others	Others	Others	Others	Others	Others	Others	Others
FBgn0025724	beta'COP	45757	-1.09872	4.35e-79	Others	Others	Others	Others	Others	Others	Others	Others	Others	Others
FBgn0010591	Sply	46059	-1.09813	9e-114	Others	Others	Others	Others	Others	Others	Others	Others	Others	Others
FBgn0019830	colt	33470	-1.09812	2.73e-62	Mitochondria	Others	Others	Others	Others	Others	Others	Others	Others	Others
FBgn0031681	Pgant5	326151	-1.09794	1.12e-45	Others	Others	Others	Others	Others	Others	Others	Others	Others	Others
FBgn0028523	CG5888	34980	-1.09789	4.41e-07	Others	Others	Others	Others	Others	Others	Others	Others	Others	Others
FBgn0031494	CG17219	33515	-1.09779	1.5e-06	Others	Others	Others	Others	Others	Others	Others	Others	Others	Others
FBgn0037312	CG11999	40637	-1.09747	4.69e-55	Others	Others	Others	Others	Others	Others	Others	Others	Others	Others
FBgn0033187	PIG-G	35685	-1.09695	1.37e-24	Others	Others	Others	Others	Others	Others	Others	Others	Others	Others
FBgn0034712	Alp8	37540	-1.09692	4.34e-166	Others	Others	Others	Others	Others	Others	Others	Others	Others	Others
FBgn0267347	squ	2768920	-1.09552	0.0316154	Others	Others	Others	Others	Others	Others	Others	Others	Others	Others
FBgn0039558	BCAS2	43348	-1.09506	3.63e-09	Others	Others	Others	Others	Others	Others	Others	Others	Others	Others
FBgn0030593	CG9512	32419	-1.09374	9.11e-73	Others	Others	Others	Others	Others	Others	Others	Others	Others	Others
FBgn0034664	CG4377	37489	-1.09288	4.32e-05	Others	Others	Others	Others	Others	Others	Others	Others	Others	Others
FBgn0016122	Acer	34189	-1.09288	4.87e-39	Others	Others	Others	Others	Others	Others	Others	Others	Others	Others
FBgn0035878	CG7182	38944	-1.09012	1.21e-51	Others	Others	Others	Others	Others	Others	Others	Others	Others	Others
FBgn0016726	RpL29	37430	-1.08955	1.21e-18	Others	Others	Others	Others	Others	Others	Others	Others	Others	Others
FBgn0037487	thw	40868	-1.08953	2.54e-25	Others	Others	Others	Others	Others	Others	Others	Others	Others	Others
FBgn0028499	CG7985	42178	-1.08933	0.00069907	Mitochondria	Others	Others	RNA_metabolism_mito	Others	Others	Others	Others	Others	Others
FBgn0035154	hiro	38083	-1.08887	4.37e-31	Others	Others	Others	Others	Others	Others	Others	Others	Others	Others
FBgn0031422	PIG-Wa	33425	-1.08869	9.44e-06	Others	Others	Others	Others	Others	Others	Others	Others	Others	Others
FBgn0036124	CG7839	39240	-1.08851	4.79e-14	Others	Others	Others	Others	Others	Others	Others	Others	Others	Others
FBgn0036843	Sfxn2	40080	-1.08791	6.01e-16	Mitochondria	Others	Others	Others	Others	Others	Others	Others	Others	Others
FBgn0037424	Osi15	40771	-1.0876	8.95e-101	Others	Others	Others	Others	Others	Others	Others	Others	Others	Others
FBgn0026761	Trap1	35559	-1.08637	3.92e-75	Mitochondria	Others	Others	Others	Others	Others	Others	Others	Others	Others
FBgn0032373	Vha100-5	34587	-1.0861	4.25e-122	Others	Others	Others	Others	Others	Others	Others	Others	Others	Others
FBgn0035393	CG16753	38365	-1.08591	1.87e-06	Others	Others	Others	Others	Others	Others	Others	Others	Others	Others
FBgn0039107	CG10300	42798	-1.0855	4.65e-06	Others	Others	Others	Others	Others	Others	Others	Others	Others	Others
FBgn0039022	Nepl13	42699	-1.08548	3.29e-06	Others	Others	Others	Others	Others	Others	Others	Others	Others	Others
FBgn0032247	CG5188	34428	-1.08515	9.89e-12	Mitochondria	Others	Others	Others	Others	Others	Others	Others	Others	Others
FBgn0034275	CG5002	37025	-1.08494	4.89e-47	Others	Others	Others	Others	Others	Others	Others	Others	Others	Others
FBgn0262647	Nup160	34549	-1.08491	1.12e-11	Others	Others	Others	Others	Others	Others	Others	Others	Others	Others
FBgn0085377	CG34348	32072	-1.08429	6.83e-28	Others	Others	Others	Others	Others	Others	Others	Others	Others	Others
FBgn0050493	Coq9	246650	-1.08408	3.46e-17	Mitochondria	Others	Others	Others	Others	Others	Others	Others	Others	Others
FBgn0010747	Srp54k	38593	-1.08295	7.33e-88	Others	Others	Others	Others	Others	Others	Others	Others	Others	Others
FBgn0030612	CG5599	32441	-1.08253	3.99e-53	Mitochondria	Others	Others	Others	Others	Others	Others	Others	TCA	Others
FBgn0062442	Cisd2	43459	-1.08223	5.32e-25	Mitochondria	Others	Others	Others	Others	Others	Others	Others	Others	Others
FBgn0033917	SmydA-1	36581	-1.08101	9.88e-40	Others	Others	Others	Others	Others	Others	Others	Others	Others	Others
FBgn0037709	CG8199	41149	-1.0807	1.52e-61	Mitochondria	Others	Others	Others	Others	Others	Others	Others	Others	Others
FBgn0261439	SdhA	37228	-1.08058	3.49e-103	Mitochondria	Others	Others	Others	Others	ETC	Others	Others	TCA	Others
FBgn0038916	dnd	42580	-1.08033	0.00839369	Others	Others	Others	Others	Others	Others	Others	Others	Others	Others
FBgn0035534	mRpS6	38535	-1.07913	8.31e-13	Mitochondria	Others	Others	Others	Translation_mito	Others	Others	Others	Others	Others
FBgn0011296	l(2)efl	37744	-1.07884	4.96e-17	Others	Others	Others	Others	Others	Others	Others	Others	Others	Others
FBgn0043578	PGRP-SB1	39870	-1.07761	0.0316929	Others	Others	Others	Others	Others	Others	Others	Others	Others	Others
FBgn0027786	Mtch	38026	-1.0774	2.81e-79	Mitochondria	Others	Others	Others	Others	Others	Others	Others	Others	Others
FBgn0026089	CG14817	31145	-1.0772	2.8e-07	Mitochondria	Others	Others	Others	Others	Others	Others	Others	Others	Others
FBgn0030451	CG15717	32262	-1.07689	1.87e-39	Others	Others	Others	Others	Others	Others	Others	Others	Others	Others
FBgn0033846	mip120	36499	-1.07484	1.69e-10	Others	Others	Others	Others	Others	Others	Others	Others	Others	Others
FBgn0036745	CG7484	39969	-1.07442	4.37e-11	Others	Others	Others	Others	Others	Others	Others	Others	Others	Others
FBgn0011603	ine	33659	-1.07382	7.58e-65	Others	Others	Others	Others	Others	Others	Others	Others	Others	Others
FBgn0031860	CG11236	33955	-1.07365	5.49e-06	Others	Others	Others	Others	Others	Others	Others	Others	Others	Others
FBgn0033264	Nup50	35784	-1.07323	5.34e-21	Others	Others	Others	Others	Others	Others	Others	Others	Others	Others
FBgn0035169	Dci	38100	-1.07281	1.04e-14	Mitochondria	Others	Others	Others	Others	Others	Others	Others	Others	Others
FBgn0033257	sand	35777	-1.0725	3.75e-12	Others	Others	Others	Others	Others	Others	Others	Others	Others	Others
FBgn0032703	CG10343	35127	-1.07148	8e-14	Others	Others	Others	Others	Others	Others	Others	Others	Others	Others
FBgn0014092	CG4278	34970	-1.07146	2.76e-16	Mitochondria	Others	Others	Others	Others	Others	Others	Others	Others	Others
FBgn0031492	CG3542	33513	-1.07145	3.83e-18	Others	Others	Others	Others	Others	Others	Others	Others	Others	Others
FBgn0039406	RpL34a	43169	-1.07091	7.18e-28	Mitochondria	Others	Others	Others	Others	Others	Others	Others	Others	Others
FBgn0034645	ND-B12	37466	-1.0706	3.17e-46	Mitochondria	Others	Others	Others	Others	ETC	Others	Others	Others	Others
FBgn0022943	Cbp20	42166	-1.06794	1.77e-12	Others	Others	Others	Others	Others	Others	Others	Others	Others	Others
FBgn0038976	Pfdn5	42647	-1.06769	9.25e-50	Others	Others	Others	Others	Others	Others	Others	Others	Others	Others
FBgn0005777	PpD3	49779	-1.06733	8.24e-42	Others	Others	Others	Others	Others	Others	Others	Others	Others	Others
FBgn0033557	CG12325	36144	-1.06682	1.69e-15	Others	Others	Others	Others	Others	Others	Others	Others	Others	Others
FBgn0033753	Cyp301a1	36378	-1.06673	3.57e-30	Mitochondria	Others	Others	Others	Others	Others	Others	Others	Others	Others
FBgn0051915	CG31915	319025	-1.06669	8.96e-28	Others	Others	Others	Others	Others	Others	Others	Others	Others	Others
FBgn0038183	CG9286	41690	-1.06666	6.79e-23	Others	Others	Others	Others	Others	Others	Others	Others	Others	Others
FBgn0033720	CG13160	36343	-1.06599	4.9e-24	Others	Others	Others	Others	Others	Others	Others	Others	Others	Others
FBgn0039244	CG11069	42976	-1.06596	5.3e-45	Others	Others	Others	Others	Others	Others	Others	Others	Others	Others
FBgn0033247	Nup44A	35762	-1.0659	1.74e-15	Others	Others	Others	Others	Others	Others	Others	Others	Others	Others
FBgn0038275	CG3817	41805	-1.06563	7.04e-08	Others	Others	Others	Others	Others	Others	Others	Others	Others	Others
FBgn0039674	CG1907	43483	-1.06529	4.68e-87	Mitochondria	Others	Others	Others	Others	Others	Others	Others	Others	Others
FBgn0021906	RFeSP	44390	-1.0644	8.5e-104	Mitochondria	Others	Others	Others	Others	ETC	Others	Others	Others	Others
FBgn0034919	CG5569	37783	-1.06348	1.9e-12	Mitochondria	Others	Others	Others	Others	Others	Others	Others	Others	Others
FBgn0053113	Rtnl1	33721	-1.0634	1.8e-153	Others	Others	Others	Others	Others	Others	Others	Others	Others	Others
FBgn0036959	CG6951	40222	-1.06262	0.000265962	Others	Others	Others	Others	Others	Others	Others	Others	Others	Others
FBgn0261020	wol	34134	-1.06214	1.34e-36	Others	Others	Others	Others	Others	Others	Others	Others	Others	Others
FBgn0032292	EMC3	34479	-1.06163	4.29e-42	Others	Others	Others	Others	Others	Others	Others	Others	Others	Others
FBgn0013717	not	40030	-1.0616	4.11e-16	Others	Others	Others	Others	Others	Others	Others	Others	Others	Others
FBgn0027085	LeuRS-m	38581	-1.06142	8.83e-22	Mitochondria	Others	Others	RNA_metabolism_mito	Translation_mito	Others	Others	Others	Others	Others
FBgn0033137	Tsp42Ep	35626	-1.0613	0.0178239	Others	Others	Others	Others	Others	Others	Others	Others	Others	Others
FBgn0032436	CG5418	34663	-1.06089	7.13e-09	Others	Others	Others	Others	Others	Others	Others	Others	Others	Others
FBgn0030159	CG9689	31922	-1.06073	5.84e-25	Others	Others	Others	Others	Others	Others	Others	Others	Others	Others
FBgn0032732	EMC5	35159	-1.05962	0.00014169	Others	Others	Others	Others	Others	Others	Others	Others	Others	Others
FBgn0011726	tsr	37841	-1.05949	3.98e-132	Others	Others	Others	Others	Others	Others	Others	Others	Others	Others
FBgn0033995	GPHR	36682	-1.05868	2.87e-14	Others	Others	Others	Others	Others	Others	Others	Others	Others	Others
FBgn0039470	CG6296	43246	-1.05781	1.32e-128	Others	Others	Others	Others	Others	Others	Others	Others	Others	Others
FBgn0034267	CG4984	37017	-1.05745	1.69e-12	Others	Others	Others	Others	Others	Others	Others	Others	Others	Others
FBgn0011509	SrpRbeta	47283	-1.05737	9.03e-89	Others	Others	Others	Others	Others	Others	Others	Others	Others	Others
FBgn0262577	CG43117	12798272	-1.05705	1.46e-11	Others	Others	Others	Others	Others	Others	Others	Others	Others	Others
FBgn0027073	Ugt49B1	37420	-1.05679	8.64e-70	Others	Others	Others	Others	Others	Others	Others	Others	Others	Others
FBgn0260648	Rrp40	319033	-1.05546	2.3e-11	Others	Others	Others	Others	Others	Others	Others	Others	Others	Others
FBgn0035524	CG11583	326206	-1.0552	3.98e-23	Others	Others	Others	Others	Others	Others	Others	Others	Others	Others
FBgn0038649	CG7718	42254	-1.05456	1.24e-19	Mitochondria	Others	Others	Others	Others	Others	Others	Others	Others	Others
FBgn0030966	shop	32878	-1.05451	3.84e-21	Mitochondria	Others	Others	Others	Others	Others	Others	Others	Others	Others
FBgn0037537	CG2767	40946	-1.05439	1.12e-44	Others	Others	Others	Others	Others	Others	Others	Others	Others	Others
FBgn0002284	Prosbeta6	39855	-1.05362	7.67e-37	Others	Others	Others	Others	Others	Others	Others	Others	Others	Others
FBgn0034791	EMC8-9	37635	-1.05347	6.17e-20	Others	Others	Others	Others	Others	Others	Others	Others	Others	Others
FBgn0034564	CG9344	37372	-1.05287	4.42e-06	Others	Others	Others	Others	Others	Others	Others	Others	Others	Others
FBgn0286784	TER94	36040	-1.05286	2.19e-68	Others	Others	Others	Others	Others	Others	Others	Others	Others	Others
FBgn0038063	Octbeta2R	41549	-1.05266	1.24e-13	Others	Others	Others	Others	Others	Others	Others	Others	Others	Others
FBgn0052409	CG32409	318016	-1.05197	6.83e-21	Others	Others	Others	Others	Others	Others	Others	Others	Others	Others
FBgn0083986	CG34150	4379863	-1.05192	0.0130413	Mitochondria	Others	Others	Others	Others	Others	Others	Others	Others	Others
FBgn0014417	CG13397	46386	-1.05151	5.66e-09	Others	Others	Others	Others	Others	Others	Others	Others	Others	Others
FBgn0004066	Prosalpha4	32584	-1.05049	1.94e-31	Others	Others	Others	Others	Others	Others	Others	Others	Others	Others
FBgn0032487	Ski6	34721	-1.0504	6.94e-05	Others	Others	Others	Others	Others	Others	Others	Others	Others	Others
FBgn0027602	CG8611	32725	-1.05032	2.14e-08	Others	Others	Others	Others	Others	Others	Others	Others	Others	Others
FBgn0031189	CG14618	33134	-1.05023	1.35e-06	Others	Others	Others	Others	Others	Others	Others	Others	Others	Others
FBgn0036714	CG7692	39934	-1.05022	5.6e-05	Others	Others	Others	Others	Others	Others	Others	Others	Others	Others
FBgn0052564	CG32564	326222	-1.04938	8.24e-94	Others	Others	Others	Others	Others	Others	Others	Others	Others	Others
FBgn0001995	mRpL4	49425	-1.0493	2.01e-27	Mitochondria	Others	Others	Others	Translation_mito	Others	Others	Others	Others	Others
FBgn0261286	Mat89Ba	41973	-1.04873	2.48e-17	Others	Others	Others	Others	Others	Others	Others	Others	Others	Others
FBgn0262029	d	34179	-1.04856	2.95e-05	Others	Others	Others	Others	Others	Others	Others	Others	Others	Others
FBgn0266570	NO66	31374	-1.0485	8.19e-38	Others	Others	Others	Others	Others	Others	Others	Others	Others	Others
FBgn0033507	CG12909	36087	-1.0484	4.51e-09	Others	Others	Others	Others	Others	Others	Others	Others	Others	Others
FBgn0036820	Grx1	40053	-1.04831	5.79e-25	Mitochondria	Others	Others	Others	Others	Others	Others	Others	Others	Others
FBgn0035112	CG13877	38036	-1.04743	6.91e-05	Others	Others	Others	Others	Others	Others	Others	Others	Others	Others
FBgn0016041	Tom40	44978	-1.04739	1.87e-122	Mitochondria	Others	Others	Others	Others	Others	Others	Protein_import_insertion_mito	Others	Others
FBgn0035429	CG12017	38404	-1.04706	2.57e-34	Others	Others	Others	Others	Others	Others	Others	Others	Others	Others
FBgn0051343	CG31343	326133	-1.04702	1.62e-155	Others	Others	Others	Others	Others	Others	Others	Others	Others	Others
FBgn0031249	CG11911	33206	-1.04612	5.13e-115	Others	Others	Others	Others	Others	Others	Others	Others	Others	Others
FBgn0036211	CG5946	39336	-1.04602	6.77e-39	Mitochondria	Others	Others	Others	Others	Others	Others	Others	Others	Others
FBgn0032178	Spn31A	34339	-1.04583	4.27e-15	Others	Others	Others	Others	Others	Others	Others	Others	Others	Others
FBgn0010282	TfIIFalpha	40790	-1.04447	1.34e-17	Others	Others	Others	Others	Others	Others	Others	Others	Others	Others
FBgn0004106	Cdk1	34411	-1.04349	0.000838221	Others	Others	Others	Others	Others	Others	Others	Others	Others	Others
FBgn0031651	mRpL24	33703	-1.04321	1.42e-29	Mitochondria	Others	Others	Others	Translation_mito	Others	Others	Others	Others	Others
FBgn0036314	Sf3a2	39456	-1.04294	3.55e-07	Others	Others	Others	Others	Others	Others	Others	Others	Others	Others
FBgn0004087	Dhfr	42003	-1.04269	2.78e-08	Mitochondria	Others	Others	Others	Others	Others	Others	Others	TCA	Others
FBgn0037873	SdhC	41340	-1.04255	2.32e-156	Mitochondria	Others	Others	Others	Others	ETC	Others	Others	TCA	Others
FBgn0033879	Echs1	36536	-1.04169	4.26e-106	Mitochondria	Others	Others	Others	Others	Others	Others	Others	Others	Others
FBgn0053510	CG33510	3346224	-1.04169	9.79e-12	Others	Others	Others	Others	Others	Others	Others	Others	Others	Others
FBgn0024509	Sec13	44437	-1.04075	3.35e-88	Others	Others	Others	Others	Others	Others	Others	Others	Others	Others
FBgn0028744	CG5033	37036	-1.0399	5.37e-30	Others	Others	Others	Others	Others	Others	Others	Others	Others	Others
FBgn0038772	mdlc	42397	-1.03923	1.23e-07	Others	Others	Others	Others	Others	Others	Others	Others	Others	Others
FBgn0052708	CG32708	318161	-1.03917	6.56e-08	Others	Others	Others	Others	Others	Others	Others	Others	Others	Others
FBgn0051739	AspRS-m	326155	-1.03917	1.34e-19	Mitochondria	Others	Others	RNA_metabolism_mito	Others	Others	Others	Others	Others	Others
FBgn0033540	Elp2	36123	-1.03868	5.3e-15	Others	Others	Others	Others	Others	Others	Others	Others	Others	Others
FBgn0030718	ND-20	32565	-1.03832	6.96e-85	Mitochondria	Others	Others	Others	Others	ETC	Others	Others	Others	Others
FBgn0030594	fiz	32420	-1.03806	5.46e-23	Others	Others	Others	Others	Others	Others	Others	Others	Others	Others
FBgn0028690	Rpn5	40717	-1.03679	1.08e-56	Others	Others	Others	Others	Others	Others	Others	Others	Others	Others
FBgn0028685	Rpt4	31567	-1.03658	7.77e-77	Others	Others	Others	Others	Others	Others	Others	Others	Others	Others
FBgn0008635	betaCOP	32820	-1.03558	2.39e-74	Others	Others	Others	Others	Others	Others	Others	Others	Others	Others
FBgn0023479	teq	39048	-1.03491	1.83e-25	Others	Others	Others	Others	Others	Others	Others	Others	Others	Others
FBgn0058002	ND-AGGG	3355155	-1.03459	1.2e-28	Mitochondria	Others	Others	Others	Others	ETC	Others	Others	Others	Others
FBgn0003187	qua	35058	-1.03441	5.49e-18	Others	Others	Others	Others	Others	Others	Others	Others	Others	Others
FBgn0039641	CG14511	43445	-1.03353	4.67e-07	Others	Others	Others	Others	Others	Others	Others	Others	Others	Others
FBgn0032162	CG4592	34317	-1.03348	6.91e-33	Mitochondria	Others	Others	Others	Others	Others	Others	Others	Others	Others
FBgn0015781	P5cr	42284	-1.03278	3.36e-25	Mitochondria	Others	Others	Others	Others	Others	Others	Others	Others	Others
FBgn0031078	Nup205	33002	-1.03269	1.08e-08	Others	Others	Others	Others	Others	Others	Others	Others	Others	Others
FBgn0038272	CG7265	41802	-1.03221	1.77e-15	Others	Others	Others	Others	Others	Others	Others	Others	Others	Others
FBgn0030217	CG2124	31989	-1.0322	2.54e-06	Mitochondria	Others	Others	RNA_metabolism_mito	Others	Others	Others	Others	Others	Others
FBgn0039163	CG5515	42875	-1.03205	1.47e-30	Others	Others	Others	Others	Others	Others	Others	Others	Others	Others
FBgn0037061	CG12975	40343	-1.03199	1.77e-06	Others	Others	Others	Others	Others	Others	Others	Others	Others	Others
FBgn0035859	CG13678	38922	-1.03162	9.95e-24	Others	Others	Others	Others	Others	Others	Others	Others	Others	Others
FBgn0035960	CG4942	39044	-1.03148	4.44e-10	Mitochondria	Others	Others	Others	Others	Others	Others	Protein_import_insertion_mito	Others	Others
FBgn0002638	Rcc1	38669	-1.03146	8.78e-30	Others	Others	Others	Others	Others	Others	Others	Others	Others	Others
FBgn0037777	CG11722	41227	-1.0313	5.7e-09	Mitochondria	Others	Others	Others	Others	Others	Others	Others	Others	Others
FBgn0050195	CG30195	37592	-1.02971	8.89e-07	Others	Others	Others	Others	Others	Others	Others	Others	Others	Others
FBgn0034828	CG13545	37675	-1.02925	1.26e-07	Others	Others	Others	Others	Others	Others	Others	Others	Others	Others
FBgn0028691	Rpn9	42802	-1.02874	1.38e-56	Others	Others	Others	Others	Others	Others	Others	Others	Others	Others
FBgn0051098	CG31098	43057	-1.02857	7.48e-31	Others	Others	Others	Others	Others	Others	Others	Others	Others	Others
FBgn0033485	RpLP0-like	36058	-1.02857	7.16e-33	Others	Others	Others	Others	Others	Others	Others	Others	Others	Others
FBgn0034307	CG10914	37075	-1.02856	1.62e-11	Mitochondria	Others	Others	Others	Others	Others	Others	Others	Others	Others
FBgn0051015	PH4alphaPV	43640	-1.02843	8.53e-33	Others	Others	Others	Others	Others	Others	Others	Others	Others	Others
FBgn0030178	Naxe	31944	-1.02835	3.82e-08	Mitochondria	Others	Others	Others	Others	Others	Others	Others	Others	Others
FBgn0023175	Prosalpha7	36018	-1.02786	1.44e-38	Others	Others	Others	Others	Others	Others	Others	Others	Others	Others
FBgn0036138	CG14143	39256	-1.02736	3.18e-42	Others	Others	Others	Others	Others	Others	Others	Others	Others	Others
FBgn0011606	Klp3A	31240	-1.0273	0.00226354	Others	Others	Others	Others	Others	Others	Others	Others	Others	Others
FBgn0039271	CG11839	43006	-1.02565	0.0290615	Others	Others	Others	Others	Others	Others	Others	Others	Others	Others
FBgn0037534	ELOVL	40943	-1.02462	9.67e-59	Others	Others	Others	Others	Others	Others	Others	Others	Others	Others
FBgn0031817	HemK1	33902	-1.02402	3.02e-13	Mitochondria	Others	Others	Others	Others	Others	Others	Others	Others	Others
FBgn0023170	RpL39	37849	-1.02328	1.25e-12	Others	Others	Others	Others	Others	Others	Others	Others	Others	Others
FBgn0262782	Mdh1	34414	-1.02298	2.36e-146	Mitochondria	Others	Others	Others	Others	Others	Others	Others	TCA	Others
FBgn0038049	Srlp	41533	-1.02277	1.09e-30	Others	Others	Others	Others	Others	Others	Others	Others	Others	Others
FBgn0031145	Ntf-2	33078	-1.02276	8.27e-54	Others	Others	Others	Others	Others	Others	Others	Others	Others	Others
FBgn0003278	RpI135	33210	-1.02274	3.19e-21	Others	Others	Others	Others	Others	Others	Others	Others	Others	Others
FBgn0036774	mRpS26	40001	-1.02211	7.93e-27	Mitochondria	Others	Others	Others	Translation_mito	Others	Others	Others	Others	Others
FBgn0030605	ND-B18	32434	-1.02123	7.85e-45	Mitochondria	Others	Others	Others	Others	ETC	Others	Others	Others	Others
FBgn0032925	CG9246	35386	-1.02047	2.46e-34	Others	Others	Others	Others	Others	Others	Others	Others	Others	Others
FBgn0035476	CG12766	38462	-1.02006	0.000523167	Others	Others	Others	Others	Others	Others	Others	Others	Others	Others
FBgn0028962	AlaRS-m	38595	-1.01975	1.35e-23	Mitochondria	Others	Others	RNA_metabolism_mito	Others	Others	Others	Others	Others	Others
FBgn0264816	koko	14462485	-1.01934	1.39e-11	Others	Others	Others	Others	Others	Others	Others	Others	Others	Others
FBgn0038666	Smu1	42272	-1.01901	1.53e-13	Others	Others	Others	Others	Others	Others	Others	Others	Others	Others
FBgn0030086	CCT2	31838	-1.01896	1.03e-28	Others	Others	Others	Others	Others	Others	Others	Others	Others	Others
FBgn0034432	CG7461	37217	-1.01885	4.16e-81	Mitochondria	Others	Others	Others	Others	Others	Others	Others	Others	Others
FBgn0037779	CG12811	41229	-1.01878	2.29e-21	Others	Others	Others	Others	Others	Others	Others	Others	Others	Others
FBgn0250906	Pgk	33461	-1.01759	3.42e-109	Others	Others	Others	Others	Others	Others	Others	Others	Others	Others
FBgn0028422	GluRIID	44483	-1.01756	3.25e-20	Others	Others	Others	Others	Others	Others	Others	Others	Others	Others
FBgn0262125	Sec23	40694	-1.01669	6.09e-83	Others	Others	Others	Others	Others	Others	Others	Others	Others	Others
FBgn0026380	Prosbeta3	41079	-1.01571	4.02e-51	Others	Others	Others	Others	Others	Others	Others	Others	Others	Others
FBgn0023181	Orc4	37970	-1.01551	4.5e-09	Others	Others	Others	Others	Others	Others	Others	Others	Others	Others
FBgn0032216	Usp14	34387	-1.01531	2.44e-55	Others	Others	Others	Others	Others	Others	Others	Others	Others	Others
FBgn0039189	CG18528	42906	-1.01378	1.49e-07	Mitochondria	Others	Others	RNA_metabolism_mito	Others	Others	Others	Others	Others	Others
FBgn0035854	CG8005	38917	-1.01326	1.66e-10	Others	Others	Others	Others	Others	Others	Others	Others	Others	Others
FBgn0263740	eIF2gamma	41843	-1.01324	1.82e-73	Others	Others	Others	Others	Others	Others	Others	Others	Others	Others
FBgn0026149	BCL7-like	31890	-1.01313	1.87e-10	Others	Others	Others	Others	Others	Others	Others	Others	Others	Others
FBgn0033741	CG8545	36365	-1.01286	2.82e-34	Others	Others	Others	Others	Others	Others	Others	Others	Others	Others
FBgn0025595	AkhR	33942	-1.01267	2.05e-13	Others	Others	Others	Others	Others	Others	Others	Others	Others	Others
FBgn0039588	mIF2	43382	-1.01214	7.12e-12	Mitochondria	Others	Others	Others	Translation_mito	Others	Others	Others	Others	Others
FBgn0034802	CNBP	37646	-1.00944	2.55e-77	Others	Others	Others	Others	Others	Others	Others	Others	Others	Others
FBgn0259785	pzg	40351	-1.00806	3.77e-28	Others	Others	Others	Others	Others	Others	Others	Others	Others	Others
FBgn0033807	AQP	36456	-1.00765	1.9e-13	Others	Others	Others	Others	Others	Others	Others	Others	Others	Others
FBgn0036298	nst	39434	-1.00724	2.25e-58	Others	Others	Others	Others	Others	Others	Others	Others	Others	Others
FBgn0029709	CHOp24	31382	-1.00704	3.96e-85	Others	Others	Others	Others	Others	Others	Others	Others	Others	Others
FBgn0039160	CG5510	42872	-1.00664	2.42e-35	Others	Others	Others	Others	Others	Others	Others	Others	Others	Others
FBgn0052407	CG32407	38667	-1.00633	7.43e-05	Others	Others	Others	Others	Others	Others	Others	Others	Others	Others
FBgn0032596	Prosbeta4	34999	-1.00629	8.91e-50	Others	Others	Others	Others	Others	Others	Others	Others	Others	Others
FBgn0286198	LKRSDH	34064	-1.00593	8.74e-11	Others	Others	Others	Others	Others	Others	Others	Others	Others	Others
FBgn0035917	Zasp66	38988	-1.00541	3.17e-149	Others	Others	Others	Others	Others	Others	Others	Others	Others	Others
FBgn0012034	AcCoAS	40348	-1.00465	1.43e-132	Others	Others	Others	Others	Others	Others	Others	Others	Others	Others
FBgn0028683	spt4	36387	-1.0038	0.00687222	Others	Others	Others	Others	Others	Others	Others	Others	Others	Others
FBgn0052418	vito	326214	-1.00354	9.99e-07	Others	Others	Others	Others	Others	Others	Others	Others	Others	Others
FBgn0031183	CG14621	33128	-1.00323	9.46e-34	Others	Others	Others	Others	Others	Others	Others	Others	Others	Others
FBgn0030511	CG11158	32327	-1.00315	6.66e-29	Others	Others	Others	Others	Others	Others	Others	Others	Others	Others
FBgn0036629	GluRS-m	39828	-1.00209	1.24e-07	Mitochondria	Others	Others	RNA_metabolism_mito	Others	Others	Others	Others	Others	Others
FBgn0262512	Vha14-1	36731	-1.00171	3.81e-42	Others	Others	Others	Others	Others	Others	Others	Others	Others	Others
FBgn0039755	CG15531	43592	-1.00066	3.44e-31	Others	Others	Others	Others	Others	Others	Others	Others	Others	Others
FBgn0024698	Cpsf160	44250	-1.00032	1.2e-06	Others	Others	Others	Others	Others	Others	Others	Others	Others	Others
FBgn0002787	Rpn8	37894	-0.999541	3.65e-64	Others	Others	Others	Others	Others	Others	Others	Others	Others	Others
FBgn0051041	CG31041	318567	-0.99935	1.12e-22	Others	Others	Others	Others	Others	Others	Others	Others	Others	Others
FBgn0030658	CG7872	32493	-0.998795	2.74e-102	Others	Others	Others	Others	Others	Others	Others	Others	Others	Others
FBgn0034117	CG7997	36829	-0.998756	9.46e-34	Others	Others	Others	Others	Others	Others	Others	Others	Others	Others
FBgn0021856	l(2)k14505	35399	-0.998512	3.63e-29	Mitochondria	Others	Others	Others	Others	Others	Others	Others	Others	Others
FBgn0034232	CG4866	36976	-0.998156	9.81e-11	Others	Others	Others	Others	Others	Others	Others	Others	Others	Others
FBgn0085271	CG34242	5740417	-0.99789	0.00566006	Others	Others	Others	Others	Others	Others	Others	Others	Others	Others
FBgn0030839	CG5613	32726	-0.997105	0.0029231	Others	Others	Others	Others	Others	Others	Others	Others	Others	Others
FBgn0037721	CG9427	41164	-0.996772	2.48e-19	Others	Others	Others	Others	Others	Others	Others	Others	Others	Others
FBgn0036691	beg	39910	-0.996358	9.93e-12	Mitochondria	Others	Others	Others	Others	Others	Others	Others	Others	Others
FBgn0031459	HINT1	33471	-0.996057	1.52e-22	Mitochondria	Others	Others	Others	Others	Others	Others	Others	Others	Others
FBgn0260477	CG30283	37454	-0.995873	0.000410658	Others	Others	Others	Others	Others	Others	Others	Others	Others	Others
FBgn0038462	EMC2A	42046	-0.995842	7.28e-14	Mitochondria	Others	Others	Others	Others	Others	Others	Others	Others	Others
FBgn0022288	l(2)09851	46662	-0.995839	1.96e-24	Others	Others	Others	Others	Others	Others	Others	Others	Others	Others
FBgn0043456	Ndf	192507	-0.995344	2.57e-70	Others	Others	Others	Others	Others	Others	Others	Others	Others	Others
FBgn0034177	AsnRS-m	36909	-0.995097	7.74e-11	Mitochondria	Others	Others	RNA_metabolism_mito	Others	Others	Others	Others	Others	Others
FBgn0261628	CG42711	10178864	-0.993441	0.0125421	Others	Others	Others	Others	Others	Others	Others	Others	Others	Others
FBgn0000071	Ama	40831	-0.993189	4.82e-07	Others	Others	Others	Others	Others	Others	Others	Others	Others	Others
FBgn0261437	CSN8	49077	-0.992354	1.25e-06	Others	Others	Others	Others	Others	Others	Others	Others	Others	Others
FBgn0052446	Atox1	326216	-0.992077	8.17e-41	Others	Others	Others	Others	Others	Others	Others	Others	Others	Others
FBgn0015521	RpS21	33487	-0.991919	5.06e-16	Others	Others	Others	Others	Others	Others	Others	Others	Others	Others
FBgn0035588	CG10672	38598	-0.991816	1.27e-23	Mitochondria	Others	Others	Others	Others	Others	Others	Others	Others	Others
FBgn0027579	mino	43350	-0.991512	2.11e-33	Mitochondria	Others	Others	Others	Others	Others	Others	Others	Others	Others
FBgn0027578	Nepl21	43413	-0.991132	2.44e-34	Others	Others	Others	Others	Others	Others	Others	Others	Others	Others
FBgn0038811	Pus1	42440	-0.99065	1.38e-15	Others	Others	Others	Others	Others	Others	Others	Others	Others	Others
FBgn0030433	mRpL49	32242	-0.990345	1.4e-19	Mitochondria	Others	Others	Others	Translation_mito	Others	Others	Others	Others	Others
FBgn0039403	Sld5	43166	-0.990269	0.000412898	Others	Others	Others	Others	Others	Others	Others	Others	Others	Others
FBgn0037236	Skp2	40548	-0.989808	1.98e-27	Others	Others	Others	Others	Others	Others	Others	Others	Others	Others
FBgn0033351	AIMP1	35892	-0.98903	2.48e-15	Others	Others	Others	Others	Others	Others	Others	Others	Others	Others
FBgn0030789	Rrp45	32665	-0.988408	1.58e-09	Others	Others	Others	Others	Others	Others	Others	Others	Others	Others
FBgn0050349	CG30349	35885	-0.987229	1.45e-15	Others	Others	Others	Others	Others	Others	Others	Others	Others	Others
FBgn0032799	CG10166	35240	-0.987121	1.07e-25	Others	Others	Others	Others	Others	Others	Others	Others	Others	Others
FBgn0039126	CG13601	42826	-0.986527	8.05e-10	Mitochondria	Others	Others	Others	Others	Others	Others	Others	Others	Others
FBgn0037530	EMC1	40933	-0.986125	1.13e-53	Others	Others	Others	Others	Others	Others	Others	Others	Others	Others
FBgn0035558	CG11357	38561	-0.984902	6.82e-22	Others	Others	Others	Others	Others	Others	Others	Others	Others	Others
FBgn0036109	Cpr67Fa2	39224	-0.984439	1.03e-07	Others	Others	Others	Others	Others	Others	Others	Others	Others	Others
FBgn0001098	Gdh	42832	-0.984097	7.84e-82	Mitochondria	Others	Others	Others	Others	Others	Others	Others	Others	Others
FBgn0032922	Coq3	35383	-0.983344	1.29e-08	Mitochondria	Others	Others	Others	Others	Others	Others	Others	Others	Others
FBgn0261975	CG42806	10178814	-0.983309	2.03e-23	Others	Others	Others	Others	Others	Others	Others	Others	Others	Others
FBgn0032076	Argl	3771738	-0.982856	2.06e-58	Others	Others	Others	Others	Others	Others	Others	Others	Others	Others
FBgn0031003	CG7889	32916	-0.982342	6.57e-13	Others	Others	Others	Others	Others	Others	Others	Others	Others	Others
FBgn0000055	Adh	3771877	-0.981383	4.83e-05	Others	Others	Others	Others	Others	Others	Others	Others	Others	Others
FBgn0038390	Rbf2	41941	-0.981137	0.00728751	Others	Others	Others	Others	Others	Others	Others	Others	Others	Others
FBgn0033571	Rpb5	36160	-0.980732	4.26e-12	Others	Others	Others	Others	Others	Others	Others	Others	Others	Others
FBgn0037492	CG10050	40873	-0.979575	8.77e-15	Others	Others	Others	Others	Others	Others	Others	Others	Others	Others
FBgn0027903	Pol31	38228	-0.979334	7.67e-07	Others	Others	Others	Others	Others	Others	Others	Others	Others	Others
FBgn0034488	Hacl	37285	-0.979261	3.12e-59	Others	Others	Others	Others	Others	Others	Others	Others	Others	Others
FBgn0028837	CSN6	42661	-0.97923	8.58e-33	Others	Others	Others	Others	Others	Others	Others	Others	Others	Others
FBgn0036623	Agpat3	39820	-0.979022	6.73e-46	Others	Others	Others	Others	Others	Others	Others	Others	Others	Others
FBgn0035722	CG10075	38758	-0.978763	7.54e-17	Mitochondria	Others	Others	Others	Others	Others	Others	Others	Others	Others
FBgn0029821	CG4020	31522	-0.97836	8.99e-19	Others	Others	Others	Others	Others	Others	Others	Others	Others	Others
FBgn0036422	CG3868	39580	-0.977875	9.23e-106	Others	Others	Others	Others	Others	Others	Others	Others	Others	Others
FBgn0286506	Mpi	41192	-0.977222	2.07e-47	Others	Others	Others	Others	Others	Others	Others	Others	Others	Others
FBgn0030611	CG15027	32440	-0.977191	3.86e-05	Others	Others	Others	Others	Others	Others	Others	Others	Others	Others
FBgn0014032	Sptr	31781	-0.975917	1.76e-27	Mitochondria	Others	Others	Others	Others	Others	Others	Others	Others	Others
FBgn0010812	unc-45	44910	-0.975574	1.53e-21	Others	Others	Others	Others	Others	Others	Others	Others	Others	Others
FBgn0262509	nrm	40515	-0.975081	2.07e-34	Others	Others	Others	Others	Others	Others	Others	Others	Others	Others
FBgn0086712	Egm	36242	-0.974406	4.31e-38	Mitochondria	Others	Others	Others	Others	Others	Others	Others	Others	Others
FBgn0033785	Sans	36427	-0.974224	3.97e-16	Others	Others	Others	Others	Others	Others	Others	Others	Others	Others
FBgn0021967	ND-PDSW	44228	-0.972202	8.5e-42	Mitochondria	Others	Others	Others	Others	ETC	Others	Others	Others	Others
FBgn0030969	Usp39	32881	-0.971909	2.54e-15	Others	Others	Others	Others	Others	Others	Others	Others	Others	Others
FBgn0037248	srl	40562	-0.971596	6.21e-11	Others	Others	Others	Others	Others	Others	Others	Others	Others	Others
FBgn0035601	Uev1A	38613	-0.971298	9.09e-41	Others	Others	Others	Others	Others	Others	Others	Others	Others	Others
FBgn0037251	CG9804	40565	-0.97122	0.000169323	Mitochondria	Others	Others	Others	Others	Others	Others	Others	Others	Others
FBgn0031479	Prx6005	33493	-0.970955	1.37e-09	Mitochondria	Others	Others	Others	Others	Others	Others	Others	Others	Others
FBgn0032770	CG13086	35208	-0.970836	0.000106078	Others	Others	Others	Others	Others	Others	Others	Others	Others	Others
FBgn0031195	CG17600	33141	-0.969748	2.8e-14	Others	Others	Others	Others	Others	Others	Others	Others	Others	Others
FBgn0083977	CG34141	4379870	-0.969535	1.09e-26	Others	Others	Others	Others	Others	Others	Others	Others	Others	Others
FBgn0004646	ogre	45382	-0.96945	1.15e-66	Others	Others	Others	Others	Others	Others	Others	Others	Others	Others
FBgn0014427	CG11899	46391	-0.968875	8.92e-47	Others	Others	Others	Others	Others	Others	Others	Others	Others	Others
FBgn0028684	Rpt5	42805	-0.968854	1.96e-34	Others	Others	Others	Others	Others	Others	Others	Others	Others	Others
FBgn0285951	mRpS34	39809	-0.968832	3.17e-19	Mitochondria	Others	Others	Others	Translation_mito	Others	Others	Others	Others	Others
FBgn0029648	CG3603	31289	-0.968722	8.28e-34	Mitochondria	Others	Others	Others	Others	Others	Others	Others	Others	Others
FBgn0022959	yps	39377	-0.968444	1.18e-84	Others	Others	Others	Others	Others	Others	Others	Others	Others	Others
FBgn0037024	tzn	40299	-0.968286	4.52e-19	Mitochondria	Others	Others	Others	Others	Others	Others	Others	Others	Others
FBgn0050105	CG30105	246459	-0.968197	0.0232549	Others	Others	Others	Others	Others	Others	Others	Others	Others	Others
FBgn0032454	CG5787	34684	-0.966337	8.53e-12	Others	Others	Others	Others	Others	Others	Others	Others	Others	Others
FBgn0034583	CG10527	37393	-0.966168	4.67e-76	Others	Others	Others	Others	Others	Others	Others	Others	Others	Others
FBgn0036846	MESR6	40083	-0.966114	1.16e-12	Others	Others	Others	Others	Others	Others	Others	Others	Others	Others
FBgn0036916	Mtr3	40173	-0.966031	8.26e-09	Others	Others	Others	Others	Others	Others	Others	Others	Others	Others
FBgn0034646	Rae1	37467	-0.966028	2.15e-30	Others	Others	Others	Others	Others	Others	Others	Others	Others	Others
FBgn0083953	CG34117	4379851	-0.966027	0.000174968	Mitochondria	Others	Others	Others	Others	Others	Others	Others	Others	Others
FBgn0015299	Ssb-c31a	34120	-0.965994	4.07e-12	Others	Others	Others	Others	Others	Others	Others	Others	Others	Others
FBgn0013531	MED20	43952	-0.965307	0.000139301	Others	Others	Others	Others	Others	Others	Others	Others	Others	Others
FBgn0000579	Eno	33351	-0.964631	2.54e-144	Mitochondria	Others	Others	Others	Others	Others	Others	Others	Others	Others
FBgn0051133	Slimp	318604	-0.964508	1.49e-08	Mitochondria	Others	Others	RNA_metabolism_mito	Translation_mito	Others	Others	Others	Others	Others
FBgn0038959	CG13856	42628	-0.963894	0.0121721	Others	Others	Others	Others	Others	Others	Others	Others	Others	Others
FBgn0028375	heix	34961	-0.963657	3.04e-17	Others	Others	Others	Others	Others	Others	Others	Others	Others	Others
FBgn0030241	feo	32015	-0.962959	0.0282041	Others	Others	Others	Others	Others	Others	Others	Others	Others	Others
FBgn0035518	CG15011	38518	-0.962243	3.96e-11	Others	Others	Others	Others	Others	Others	Others	Others	Others	Others
FBgn0032079	CG31886	326170	-0.962237	2.07e-22	Others	Others	Others	Others	Others	Others	Others	Others	Others	Others
FBgn0030061	CG1785	31810	-0.962066	1.7e-14	Others	Others	Others	Others	Others	Others	Others	Others	Others	Others
FBgn0027568	Cand1	34403	-0.961171	8.24e-12	Others	Others	Others	Others	Others	Others	Others	Others	Others	Others
FBgn0033734	CG8520	36357	-0.961034	3.83e-32	Mitochondria	Others	Others	Others	Others	Others	Others	Others	Others	Others
FBgn0032729	L2HGDH	35156	-0.960813	8.49e-57	Mitochondria	Others	Others	Others	Others	Others	Others	Others	Others	Others
FBgn0266917	Sf3a1	42048	-0.960504	2.3e-06	Others	Others	Others	Others	Others	Others	Others	Others	Others	Others
FBgn0034073	CG8414	36774	-0.960185	1.5e-08	Others	Others	Others	Others	Others	Others	Others	Others	Others	Others
FBgn0032205	CG4957	34374	-0.958897	2.41e-10	Mitochondria	Others	Others	Others	Others	Others	Others	Others	Others	Others
FBgn0034612	CG10505	37428	-0.958346	2e-05	Others	Others	Others	Others	Others	Others	Others	Others	Others	Others
FBgn0036537	CG18081	39725	-0.958277	1.97e-22	Others	Others	Others	Others	Others	Others	Others	Others	Others	Others
FBgn0039856	CG1774	43722	-0.957513	2.14e-21	Mitochondria	Others	Others	Others	Others	Others	Others	Others	Others	Others
FBgn0050394	CG30394	37437	-0.956293	1.22e-18	Others	Others	Others	Others	Others	Others	Others	Others	Others	Others
FBgn0033754	Ak6	36379	-0.955701	3.1e-05	Others	Others	Others	Others	Others	Others	Others	Others	Others	Others
FBgn0051954	CG31954	33572	-0.955337	2.96e-05	Others	Others	Others	Others	Others	Others	Others	Others	Others	Others
FBgn0034859	CG3520	37708	-0.955306	0.000682115	Others	Others	Others	Others	Others	Others	Others	Others	Others	Others
FBgn0039698	CG7789	43516	-0.95446	6.03e-22	Others	Others	Others	Others	Others	Others	Others	Others	Others	Others
FBgn0262563	CG43103	12798325	-0.954073	5.04e-06	Others	Others	Others	Others	Others	Others	Others	Others	Others	Others
FBgn0037700	CG8149	41137	-0.952694	1.96e-09	Others	Others	Others	Others	Others	Others	Others	Others	Others	Others
FBgn0033913	CG8468	36577	-0.952038	2.49e-57	Others	Others	Others	Others	Others	Others	Others	Others	Others	Others
FBgn0263598	Vha68-2	45012	-0.951977	5.93e-183	Others	Others	Others	Others	Others	Others	Others	Others	Others	Others
FBgn0259226	CG42326	35838	-0.950533	2.66e-08	Others	Others	Others	Others	Others	Others	Others	Others	Others	Others
FBgn0039115	CG10214	42811	-0.949883	2.06e-15	Mitochondria	Others	Others	Others	Others	Others	Others	Others	Others	Others
FBgn0039613	Nepl20	43412	-0.94941	6.69e-05	Others	Others	Others	Others	Others	Others	Others	Others	Others	Others
FBgn0032160	CG4598	34315	-0.949344	5.72e-31	Mitochondria	Others	Others	Others	Others	Others	Others	Others	Others	Others
FBgn0042138	CG18815	59176	-0.948767	1.66e-76	Others	Others	Others	Others	Others	Others	Others	Others	Others	Others
FBgn0039125	Ndc1	42825	-0.948706	1.23e-17	Others	Others	Others	Others	Others	Others	Others	Others	Others	Others
FBgn0021750	SerRS-m	41862	-0.945895	1.13e-14	Mitochondria	Others	Others	RNA_metabolism_mito	Translation_mito	Others	Others	Others	Others	Others
FBgn0034093	CG15706	36799	-0.945678	5.49e-16	Others	Others	Others	Others	Others	Others	Others	Others	Others	Others
FBgn0039741	CG7943	43574	-0.943434	4.75e-31	Mitochondria	Others	Others	Others	Others	Others	Others	Others	Others	Others
FBgn0020638	Lcp65Ag1	38703	-0.942744	1.89e-46	Others	Others	Others	Others	Others	Others	Others	Others	Others	Others
FBgn0035911	CG6638	38979	-0.94249	4.86e-56	Mitochondria	Others	Others	Others	Others	Others	Others	Others	Others	Others
FBgn0032705	Grip71	35130	-0.942251	0.000389145	Others	Others	Others	Others	Others	Others	Others	Others	Others	Others
FBgn0026207	mbo	41562	-0.942131	6.37e-18	Others	Others	Others	Others	Others	Others	Others	Others	Others	Others
FBgn0030743	CG9921	32599	-0.94185	9.85e-09	Mitochondria	Others	Others	Others	Others	Others	Others	Others	Others	Others
FBgn0013563	Pex1	45460	-0.941527	3.18e-12	Others	Others	Others	Others	Others	Others	Others	Others	Others	Others
FBgn0261065	Cpsf73	42240	-0.941235	1.97e-11	Others	Others	Others	Others	Others	Others	Others	Others	Others	Others
FBgn0037669	Ibf2	41102	-0.941108	0.000555048	Others	Others	Others	Others	Others	Others	Others	Others	Others	Others
FBgn0033483	egr	36054	-0.941035	1.67e-11	Others	Others	Others	Others	Others	Others	Others	Others	Others	Others
FBgn0031320	CG5126	33306	-0.940872	7.05e-23	Others	Others	Others	Others	Others	Others	Others	Others	Others	Others
FBgn0085473	CG34444	5740745	-0.940523	0.00573724	Others	Others	Others	Others	Others	Others	Others	Others	Others	Others
FBgn0027108	Inx2	31646	-0.940485	2.07e-81	Mitochondria	Others	Others	Others	Others	Others	Others	Others	Others	Others
FBgn0003978	vls	35289	-0.940309	7.83e-17	Others	Others	Others	Others	Others	Others	Others	Others	Others	Others
FBgn0033081	geminin	35563	-0.939849	6.37e-09	Others	Others	Others	Others	Others	Others	Others	Others	Others	Others
FBgn0035383	CPT2	38355	-0.939483	6.24e-38	Mitochondria	Others	Others	Others	Others	Others	Others	Others	Others	Others
FBgn0030310	PGRP-SA	32099	-0.939467	7.99e-11	Others	Others	Others	Others	Others	Others	Others	Others	Others	Others
FBgn0022069	Nnp-1	44391	-0.938493	5.7e-52	Others	Others	Others	Others	Others	Others	Others	Others	Others	Others
FBgn0036804	Sgf11	40035	-0.937261	0.00040959	Others	Others	Others	Others	Others	Others	Others	Others	Others	Others
FBgn0085426	Rgk3	5740446	-0.937246	8.68e-05	Others	Others	Others	Others	Others	Others	Others	Others	Others	Others
FBgn0033645	CG13196	36250	-0.936814	8.34e-05	Others	Others	Others	Others	Others	Others	Others	Others	Others	Others
FBgn0050499	Rpe	35692	-0.935673	2.54e-27	Others	Others	Others	Others	Others	Others	Others	Others	Others	Others
FBgn0000330	cm	31647	-0.935458	3.73e-23	Others	Others	Others	Others	Others	Others	Others	Others	Others	Others
FBgn0039302	Nup358	43041	-0.934928	1.89e-15	Others	Others	Others	Others	Others	Others	Others	Others	Others	Others
FBgn0036096	CG8003	39210	-0.934841	3.96e-35	Others	Others	Others	Others	Others	Others	Others	Others	Others	Others
FBgn0040600	CG13631	50073	-0.934213	1.05e-10	Others	Others	Others	Others	Others	Others	Others	Others	Others	Others
FBgn0031000	Muc18B	32913	-0.934027	9.64e-47	Others	Others	Others	Others	Others	Others	Others	Others	Others	Others
FBgn0039929	CG11076	43830	-0.933763	2.02e-35	Others	Others	Others	Others	Others	Others	Others	Others	Others	Others
FBgn0028695	Rpn1	40174	-0.933701	4.2e-60	Others	Others	Others	Others	Others	Others	Others	Others	Others	Others
FBgn0037667	CG16734	41100	-0.932601	1.12e-07	Others	Others	Others	Others	Others	Others	Others	Others	Others	Others
FBgn0050163	Cpr60D	246492	-0.932386	7.4e-07	Others	Others	Others	Others	Others	Others	Others	Others	Others	Others
FBgn0026326	Mad1	35954	-0.93175	1.2e-09	Others	Others	Others	Others	Others	Others	Others	Others	Others	Others
FBgn0032167	CG5853	34322	-0.931579	4.17e-24	Others	Others	Others	Others	Others	Others	Others	Others	Others	Others
FBgn0051439	Muc96D	318737	-0.931022	1.54e-73	Others	Others	Others	Others	Others	Others	Others	Others	Others	Others
FBgn0037127	CG14566	40421	-0.93049	5.11e-17	Others	Others	Others	Others	Others	Others	Others	Others	Others	Others
FBgn0037181	CG11370	40486	-0.93038	5.92e-73	Others	Others	Others	Others	Others	Others	Others	Others	Others	Others
FBgn0265189	sud1	19834718	-0.930227	3.04e-08	Others	Others	Others	Others	Others	Others	Others	Others	Others	Others
FBgn0000181	bic	45827	-0.930143	2.11e-108	Others	Others	Others	Others	Others	Others	Others	Others	Others	Others
FBgn0034249	RhoGAP54D	36996	-0.929635	0.00570764	Others	Others	Others	Others	Others	Others	Others	Others	Others	Others
FBgn0030802	DENR	32679	-0.92926	2.8e-11	Others	Others	Others	Others	Others	Others	Others	Others	Others	Others
FBgn0030342	CG10347	32141	-0.928609	1.64e-21	Others	Others	Others	Others	Others	Others	Others	Others	Others	Others
FBgn0036008	CG3408	39107	-0.927638	1.94e-11	Others	Others	Others	Others	Others	Others	Others	Others	Others	Others
FBgn0030394	Cpr11A	32198	-0.927147	8.8e-118	Others	Others	Others	Others	Others	Others	Others	Others	Others	Others
FBgn0034010	CG8157	36700	-0.927141	3.37e-11	Others	Others	Others	Others	Others	Others	Others	Others	Others	Others
FBgn0035064	TyrRS-m	37965	-0.926286	4.88e-15	Mitochondria	Others	Others	RNA_metabolism_mito	Translation_mito	Others	Others	Others	Others	Others
FBgn0033724	CG8501	36347	-0.925885	2.16e-08	Others	Others	Others	Others	Others	Others	Others	Others	Others	Others
FBgn0032961	CG1416	35426	-0.925707	1.8e-44	Others	Others	Others	Others	Others	Others	Others	Others	Others	Others
FBgn0286782	flz	35902	-0.925238	8.18e-23	Others	Others	Others	Others	Others	Others	Others	Others	Others	Others
FBgn0030501	BthD	32317	-0.924192	0.0372843	Others	Others	Others	Others	Others	Others	Others	Others	Others	Others
FBgn0000617	e(y)1	32762	-0.923219	0.000842591	Others	Others	Others	Others	Others	Others	Others	Others	Others	Others
FBgn0050049	CG30049	246416	-0.922672	6.27e-08	Others	Others	Others	Others	Others	Others	Others	Others	Others	Others
FBgn0035612	frm	38624	-0.922077	1.48e-111	Others	Others	Others	Others	Others	Others	Others	Others	Others	Others
FBgn0029813	AgmNAT	31512	-0.921918	0.000436656	Others	Others	Others	Others	Others	Others	Others	Others	Others	Others
FBgn0023517	Pgam5	31143	-0.921794	9.92e-17	Mitochondria	Others	Others	Others	Others	Others	Others	Others	Others	Others
FBgn0035206	sturkopf	38150	-0.921098	5.01e-55	Others	Others	Others	Others	Others	Others	Others	Others	Others	Others
FBgn0034588	CG9394	37399	-0.920957	2.23e-52	Others	Others	Others	Others	Others	Others	Others	Others	Others	Others
FBgn0030720	CG8939	32568	-0.920543	4.12e-23	Others	Others	Others	Others	Others	Others	Others	Others	Others	Others
FBgn0026562	SPARC	43230	-0.920468	1.98e-83	Others	Others	Others	Others	Others	Others	Others	Others	Others	Others
FBgn0033883	CG16935	36540	-0.920401	2.6e-26	Mitochondria	Others	Others	Others	Others	Others	Others	Others	Others	Others
FBgn0020655	ArfGAP1	39417	-0.920216	8.43e-24	Others	Others	Others	Others	Others	Others	Others	Others	Others	Others
FBgn0261609	eIF2alpha	32617	-0.91967	2.98e-53	Others	Others	Others	Others	Others	Others	Others	Others	Others	Others
FBgn0029823	Shmt	31524	-0.919599	8.77e-63	Mitochondria	Others	Others	Others	Others	Others	Others	Others	Others	Others
FBgn0021776	mira	42379	-0.919405	0.000905581	Others	Others	Others	Others	Others	Others	Others	Others	Others	Others
FBgn0032168	CG13126	34323	-0.918964	1.29e-08	Mitochondria	Others	Others	Others	Others	Others	Others	Others	Others	Others
FBgn0038603	PKD	42203	-0.918689	9.69e-31	Others	Others	Others	Others	Others	Others	Others	Others	Others	Others
FBgn0022349	CG1910	43741	-0.918666	4.23e-36	Others	Others	Others	Others	Others	Others	Others	Others	Others	Others
FBgn0026196	nop5	33966	-0.918433	7.35e-37	Others	Others	Others	Others	Others	Others	Others	Others	Others	Others
FBgn0036624	RAF2	39821	-0.917862	4.41e-08	Others	Others	Others	Others	Others	Others	Others	Others	Others	Others
FBgn0023511	Edem1	31154	-0.917582	5.1e-16	Others	Others	Others	Others	Others	Others	Others	Others	Others	Others
FBgn0032143	CG4017	34296	-0.917448	7.25e-08	Others	Others	Others	Others	Others	Others	Others	Others	Others	Others
FBgn0032480	Edem2	34714	-0.917114	6.37e-19	Others	Others	Others	Others	Others	Others	Others	Others	Others	Others
FBgn0265048	cv-d	41921	-0.91672	9.98e-21	Others	Others	Others	Others	Others	Others	Others	Others	Others	Others
FBgn0034707	MED16	37535	-0.916305	3.72e-07	Others	Others	Others	Others	Others	Others	Others	Others	Others	Others
FBgn0034186	CG8950	36921	-0.916252	2.28e-06	Others	Others	Others	Others	Others	Others	Others	Others	Others	Others
FBgn0033737	Nup54	36360	-0.915619	7.05e-08	Others	Others	Others	Others	Others	Others	Others	Others	Others	Others
FBgn0015799	Rbf	31027	-0.915462	1.6e-15	Others	Others	Others	Others	Others	Others	Others	Others	Others	Others
FBgn0036928	Tom20	40189	-0.915457	1.42e-56	Mitochondria	Others	Others	RNA_metabolism_mito	Others	Others	Others	Protein_import_insertion_mito	Others	Others
FBgn0034215	Mtap	36955	-0.914646	1.76e-27	Others	Others	Others	Others	Others	Others	Others	Others	Others	Others
FBgn0264694	mgr	41365	-0.91455	2.33e-22	Others	Others	Others	Others	Others	Others	Others	Others	Others	Others
FBgn0039802	dj-1beta	43652	-0.913893	3.56e-20	Mitochondria	Others	Others	Others	Others	Others	Others	Others	Others	Others
FBgn0034901	CG11300	37760	-0.913697	6.02e-55	Others	Others	Others	Others	Others	Others	Others	Others	Others	Others
FBgn0031312	Tango14	33298	-0.91327	1.42e-13	Others	Others	Others	Others	Others	Others	Others	Others	Others	Others
FBgn0031813	CG9527	33898	-0.912966	7.65e-54	Mitochondria	Others	Others	Others	Others	Others	Others	Others	Others	Others
FBgn0039681	CG7582	43492	-0.9126	0.000114465	Others	Others	Others	Others	Others	Others	Others	Others	Others	Others
FBgn0002707	mei-9	31373	-0.911534	0.000222302	Others	Others	Others	Others	Others	Others	Others	Others	Others	Others
FBgn0037566	mRpL1	40980	-0.910958	3.18e-24	Mitochondria	Others	Others	Others	Translation_mito	Others	Others	Others	Others	Others
FBgn0031590	CG3702	33628	-0.910914	1.25e-49	Others	Others	Others	Others	Others	Others	Others	Others	Others	Others
FBgn0037670	Ibf1	41103	-0.910774	0.00153514	Others	Others	Others	Others	Others	Others	Others	Others	Others	Others
FBgn0039272	CG11836	43007	-0.909547	3.29e-21	Others	Others	Others	Others	Others	Others	Others	Others	Others	Others
FBgn0003423	slgA	33117	-0.909416	2.9e-52	Mitochondria	Others	Others	Others	Others	Others	Others	Others	Others	Others
FBgn0035906	GstO2	38974	-0.908539	1.63e-23	Others	Others	Others	Others	Others	Others	Others	Others	Others	Others
FBgn0003447	sn	31717	-0.908513	5.74e-14	Others	Others	Others	Others	Others	Others	Others	Others	Others	Others
FBgn0036726	QIL1	39948	-0.908422	6.06e-59	Others	Others	Others	Others	Others	Others	Others	Others	Others	Others
FBgn0037073	Tsr1	40360	-0.908186	2.44e-46	Others	Others	Others	Others	Others	Others	Others	Others	Others	Others
FBgn0032222	CG5037	34394	-0.907599	8.02e-35	Mitochondria	Others	Others	Others	Others	Others	Others	Others	Others	Heme_metabolism
FBgn0035189	CG9119	38124	-0.907155	4.28e-65	Others	Others	Others	Others	Others	Others	Others	Others	Others	Others
FBgn0051715	CG31715	318909	-0.906992	5.4e-14	Others	Others	Others	Others	Others	Others	Others	Others	Others	Others
FBgn0001137	grk	34171	-0.905287	1.46e-05	Others	Others	Others	Others	Others	Others	Others	Others	Others	Others
FBgn0032640	Sgt	35052	-0.905029	2.27e-45	Others	Others	Others	Others	Others	Others	Others	Others	Others	Others
FBgn0038072	CG6225	41559	-0.904709	6.04e-09	Others	Others	Others	Others	Others	Others	Others	Others	Others	Others
FBgn0063497	GstE3	37108	-0.904589	6.11e-12	Others	Others	Others	Others	Others	Others	Others	Others	Others	Others
FBgn0051792	CG31792	35163	-0.904535	7.15e-10	Others	Others	Others	Others	Others	Others	Others	Others	Others	Others
FBgn0260856	Membrin	38614	-0.904273	9.8e-13	Others	Others	Others	Others	Others	Others	Others	Others	Others	Others
FBgn0037924	CG14712	41397	-0.903499	5.8e-05	Others	Others	Others	Others	Others	Others	Others	Others	Others	Others
FBgn0037017	CG4074	40290	-0.903323	6.34e-05	Others	Others	Others	Others	Others	Others	Others	Others	Others	Others
FBgn0051648	CG31648	33776	-0.903219	2.15e-15	Mitochondria	Others	Others	Others	Others	Others	Others	Others	Others	Others
FBgn0028475	Hrd3	42806	-0.902303	1.39e-30	Others	Others	Others	Others	Others	Others	Others	Others	Others	Others
FBgn0038429	CG14882	41994	-0.901678	2.24e-08	Others	Others	Others	Others	Others	Others	Others	Others	Others	Others
FBgn0020645	Lcp65Aa	38709	-0.900789	3.65e-12	Others	Others	Others	Others	Others	Others	Others	Others	Others	Others
FBgn0036686	CG7728	39904	-0.899822	1.35e-10	Others	Others	Others	Others	Others	Others	Others	Others	Others	Others
FBgn0051288	CG31288	318664	-0.899642	7.8e-22	Others	Others	Others	Others	Others	Others	Others	Others	Others	Others
FBgn0036887	CG9231	40130	-0.898741	5.61e-17	Mitochondria	Others	Others	Others	Others	Others	Others	Others	Others	Others
FBgn0053052	Gorab	326245	-0.898665	2.59e-11	Others	Others	Others	Others	Others	Others	Others	Others	Others	Others
FBgn0037718	P58IPK	41161	-0.897952	1.74e-66	Others	Others	Others	Others	Others	Others	Others	Others	Others	Others
FBgn0038722	Nup58	42342	-0.897163	3.26e-06	Others	Others	Others	Others	Others	Others	Others	Others	Others	Others
FBgn0030293	CG1737	32077	-0.897056	2.94e-06	Others	Others	Others	Others	Others	Others	Others	Others	Others	Others
FBgn0038586	CG7168	42184	-0.896922	0.00166773	Others	Others	Others	Others	Others	Others	Others	Others	Others	Others
FBgn0037199	EMC4	40505	-0.896228	1.1e-13	Others	Others	Others	Others	Others	Others	Others	Others	Others	Others
FBgn0250814	UQCR-C2	39846	-0.896145	2.37e-82	Mitochondria	Others	Others	Others	Others	ETC	Others	Protein_import_insertion_mito	Others	Others
FBgn0036512	CG16979	39687	-0.895675	1.35e-32	Others	Others	Others	Others	Others	Others	Others	Others	Others	Others
FBgn0040575	CG15922	50048	-0.89563	0.0205112	Others	Others	Others	Others	Others	Others	Others	Others	Others	Others
FBgn0051075	CG31075	43244	-0.895486	1.88e-19	Mitochondria	Others	Others	Others	Others	Others	Others	Others	Others	Others
FBgn0039258	beta4GalT7	42991	-0.895321	1.19e-07	Others	Others	Others	Others	Others	Others	Others	Others	Others	Others
FBgn0035334	CG8993	38301	-0.894879	1.87e-08	Mitochondria	Others	Others	Others	Others	Others	Others	Others	Others	Others
FBgn0027521	CG3679	32591	-0.894475	0.00978042	Others	Others	Others	Others	Others	Others	Others	Others	Others	Others
FBgn0027053	CSN5	42000	-0.894467	1.78e-17	Others	Others	Others	Others	Others	Others	Others	Others	Others	Others
FBgn0037376	Hat1	40716	-0.89427	4.26e-17	Others	Others	Others	Others	Others	Others	Others	Others	Others	Others
FBgn0011297	Alg3	37754	-0.893857	2.92e-24	Others	Others	Others	Others	Others	Others	Others	Others	Others	Others
FBgn0032733	CG15170	35160	-0.893768	4.07e-05	Others	Others	Others	Others	Others	Others	Others	Others	Others	Others
FBgn0259937	Nop60B	37873	-0.893313	1.52e-45	Others	Others	Others	Others	Others	Others	Others	Others	Others	Others
FBgn0045866	bai	42996	-0.892904	5.98e-53	Others	Others	Others	Others	Others	Others	Others	Others	Others	Others
FBgn0002021	l(2)37Bb	49427	-0.892433	2.67e-21	Mitochondria	Others	Others	Others	Others	Others	Others	Others	Others	Others
FBgn0016983	smid	38824	-0.892175	2.65e-22	Others	Others	Others	Others	Others	Others	Others	Others	Others	Others
FBgn0011204	cue	38174	-0.891572	2.95e-31	Others	Others	Others	Others	Others	Others	Others	Others	Others	Others
FBgn0261786	mi	37723	-0.891555	7.26e-05	Others	Others	Others	Others	Others	Others	Others	Others	Others	Others
FBgn0032488	CG16812	34722	-0.891413	7.73e-08	Others	Others	Others	Others	Others	Others	Others	Others	Others	Others
FBgn0034401	MetRS	37177	-0.891383	1.23e-35	Others	Others	Others	Others	Others	Others	Others	Others	Others	Others
FBgn0040660	CG13551	50133	-0.891205	5.7e-59	Mitochondria	Others	Others	Others	Others	Others	Others	Others	Others	Heme_metabolism
FBgn0051249	CG31249	42129	-0.891136	1.32e-07	Others	Others	Others	Others	Others	Others	Others	Others	Others	Others
FBgn0030096	Zpr1	31851	-0.890351	1.77e-14	Others	Others	Others	Others	Others	Others	Others	Others	Others	Others
FBgn0039671	CG11470	43480	-0.890133	2.32e-11	Others	Others	Others	Others	Others	Others	Others	Others	Others	Others
FBgn0030851	CG8326	32738	-0.890122	0.000187013	Others	Others	Others	Others	Others	Others	Others	Others	Others	Others
FBgn0003890	betaTub97EF	43359	-0.889975	2.9e-67	Others	Others	Others	Others	Others	Others	Others	Others	Others	Others
FBgn0038471	CG5220	42056	-0.88898	3.7e-09	Others	Others	Others	Others	Others	Others	Others	Others	Others	Others
FBgn0030407	Fpgs	32212	-0.888681	7.77e-07	Mitochondria	Others	Others	Others	Others	Others	Others	Others	Others	Others
FBgn0023535	arg	46717	-0.888626	7.21e-20	Mitochondria	Others	Others	Others	Others	Others	Others	Others	Others	Others
FBgn0031500	CG17221	33521	-0.888489	6.98e-14	Mitochondria	Others	Others	Others	Others	Others	Others	Others	Others	Others
FBgn0035978	UGP	39065	-0.887964	8.11e-65	Others	Others	Others	Others	Others	Others	Others	Others	Others	Others
FBgn0033523	CG12895	36103	-0.887823	2.01e-07	Mitochondria	Others	Others	Others	Others	ETC	Others	Others	TCA	Others
FBgn0033241	CG2915	35754	-0.887701	1.15e-50	Others	Others	Others	Others	Others	Others	Others	Others	Others	Others
FBgn0035435	PIG-C	38410	-0.887401	0.000366929	Others	Others	Others	Others	Others	Others	Others	Others	Others	Others
FBgn0033653	CG13192	36259	-0.887349	5.17e-12	Others	Others	Others	Others	Others	Others	Others	Others	Others	Others
FBgn0037106	CG11307	40400	-0.886975	6.33e-07	Others	Others	Others	Others	Others	Others	Others	Others	Others	Others
FBgn0259233	CG42331	42948	-0.886667	6.19e-16	Others	Others	Others	Others	Others	Others	Others	Others	Others	Others
FBgn0039854	CG1635	43720	-0.886282	1.67e-11	Mitochondria	Others	Others	Others	Others	Others	Others	Others	Others	Others
FBgn0029113	Uba2	44496	-0.886006	7.94e-21	Others	Others	Others	Others	Others	Others	Others	Others	Others	Others
FBgn0261976	Psf2	33641	-0.884219	0.000267994	Others	Others	Others	Others	Others	Others	Others	Others	Others	Others
FBgn0038074	Gnmt	41561	-0.884139	2.96e-24	Others	Others	Others	Others	Others	Others	Others	Others	Others	Others
FBgn0037414	Osi7	40761	-0.884034	5.26e-93	Others	Others	Others	Others	Others	Others	Others	Others	Others	Others
FBgn0260049	flr	39505	-0.883615	1.58e-55	Others	Others	Others	Others	Others	Others	Others	Others	Others	Others
FBgn0001258	Ldh	45880	-0.883338	8.97e-72	Mitochondria	Others	Others	Others	Others	Others	Others	Others	Others	Others
FBgn0036488	CG6878	39656	-0.881844	1.08e-13	Mitochondria	Others	Others	Others	Others	Others	Others	Protein_import_insertion_mito	Others	Others
FBgn0010228	HmgZ	37480	-0.88168	7.86e-53	Others	Others	Others	Others	Others	Others	Others	Others	Others	Others
FBgn0039078	CG4374	42767	-0.881374	0.00308555	Others	Others	Others	Others	Others	Others	Others	Others	Others	Others
FBgn0050291	CG30291	246534	-0.880688	2.46e-32	Others	Others	Others	Others	Others	Others	Others	Others	Others	Others
FBgn0035806	PGRP-SD	38858	-0.880237	9.24e-06	Others	Others	Others	Others	Others	Others	Others	Others	Others	Others
FBgn0004587	B52	41670	-0.880131	8.93e-32	Others	Others	Others	Others	Others	Others	Others	Others	Others	Others
FBgn0036467	CG12310	39634	-0.88002	3.29e-48	Others	Others	Others	Others	Others	Others	Others	Others	Others	Others
FBgn0034438	CG9416	37223	-0.877731	4.28e-14	Others	Others	Others	Others	Others	Others	Others	Others	Others	Others
FBgn0030778	CG4678	32652	-0.877625	1.21e-08	Others	Others	Others	Others	Others	Others	Others	Others	Others	Others
FBgn0040364	CG11378	31060	-0.877314	2.45e-51	Others	Others	Others	Others	Others	Others	Others	Others	Others	Others
FBgn0017457	U2af38	33201	-0.877108	2.48e-08	Others	Others	Others	Others	Others	Others	Others	Others	Others	Others
FBgn0050197	CG30197	246513	-0.877087	1.46e-09	Others	Others	Others	Others	Others	Others	Others	Others	Others	Others
FBgn0286898	Tango1	33930	-0.876781	1.41e-11	Others	Others	Others	Others	Others	Others	Others	Others	Others	Others
FBgn0265298	SC35	53444	-0.876113	8.4e-52	Others	Others	Others	Others	Others	Others	Others	Others	Others	Others
FBgn0036108	Cpr67Fa1	39223	-0.875553	1.93e-13	Others	Others	Others	Others	Others	Others	Others	Others	Others	Others
FBgn0036368	CG10738	39516	-0.875258	2.12e-06	Others	Others	Others	Others	Others	Others	Others	Others	Others	Others
FBgn0027495	Smyd4-4	36299	-0.875086	1.02e-18	Others	Others	Others	Others	Others	Others	Others	Others	Others	Others
FBgn0261278	grp	34993	-0.874583	4.17e-18	Others	Others	Others	Others	Others	Others	Others	Others	Others	Others
FBgn0038865	cDIP	42512	-0.874202	1.21e-08	Others	Others	Others	Others	Others	Others	Others	Others	Others	Others
FBgn0037370	CG1236	40708	-0.873689	2e-20	Mitochondria	Others	Others	Others	Others	Others	Others	Others	Others	Others
FBgn0086904	Nacalpha	36409	-0.872551	8.68e-94	Others	Others	Others	Others	Others	Others	Others	Others	Others	Others
FBgn0031693	Cyp4ac1	33754	-0.872389	1.24e-26	Others	Others	Others	Others	Others	Others	Others	Others	Others	Others
[truncated: 5,636 more rows]

## Sheet: Supplementary file 5b
	Nuclear-encoded ETC genes that down-regulated more than two-fold in CG1603PBac:
	Complex I					Complex II					Complex III					Complex IV					Complex V
	ID	SYMBOL	log2FoldChange	padj		ID	SYMBOL	log2FoldChange	padj		ID	SYMBOL	log2FoldChange	padj		ID	SYMBOL	log2FoldChange	padj		ID	SYMBOL	log2FoldChange	padj
	FBgn0033961	ND-B15	-1.86231	7.18e-39		FBgn0033274	CG14757	-2.29923	0.0338137		FBgn0011227	ox	-2.18159	9.64e-42		FBgn0263911	COX8	-1.89886	1.73e-180		FBgn0083167	Neb-cGP	-1.88529	1.72e-225
	FBgn0031228	ND-15	-1.74827	1.45e-89		FBgn0039112	SdhD	-1.42153	3.14e-90		FBgn0034245	UQCR-6.4	-1.68072	7.14e-17		FBgn0015031	cype	-1.85322	1.39e-126		FBgn0014391	sun	-1.84254	5.91e-75
	FBgn0031505	ND-B14.5B	-1.60792	4.02e-48		FBgn0261439	SdhA	-1.08058	3.49e-103		FBgn0036728	UQCR-Q	-1.6368	3.68e-135		FBgn0052230	ND-MLRQ	-1.63878	1.47e-39		FBgn0010612	ATPsynG	-1.78053	2.48e-181
	FBgn0030292	CG11752	-1.55705	1.79e-47		FBgn0037873	SdhC	-1.04255	2.32e-156		FBgn0286783	Etf-QO	-1.51886	7.36e-123		FBgn0040529	COX7A	-1.62371	7.78e-199		FBgn0016691	ATPsynO	-1.75162	8.41e-303
	FBgn0031436	ND-B17.2	-1.46783	2.65e-85							FBgn0035600	Cyt-c1	-1.32177	0		FBgn0032833	COX4	-1.61064	1.45e-202		FBgn0011211	blw	-1.6909	1.74e-290
	FBgn0047038	ND-13B	-1.45729	9.48e-79							FBgn0260008	UQCR-11	-1.29719	1.17e-65		FBgn0031066	COX6B	-1.52635	1.82e-179		FBgn0035032	ATPsynF	-1.60003	1.72e-227
	FBgn0033570	ND-B14	-1.44417	1.04e-86							FBgn0021906	RFeSP	-1.0644	8.5e-104		FBgn0284248	Cyt-c-p	-1.46248	3.27e-247		FBgn0039830	ATPsynC	-1.57696	0
	FBgn0025839	ND-B14.5A	-1.4237	1.51e-52												FBgn0019624	COX5A	-1.44206	0		FBgn0016119	ATPsynCF6	-1.5418	2.77e-61
	FBgn0032511	ND-B22	-1.38664	4.48e-127												FBgn0034877	levy	-1.40317	1.07e-133		FBgn0038224	ATPsynE	-1.49666	7.55e-148
	FBgn0011361	ND-ACP	-1.38304	4.47e-138												FBgn0034578	CG15653	-1.32207	3.28e-06		FBgn0028342	ATPsyndelta	-1.48579	2.18e-181
	FBgn0031021	ND-18	-1.3707	2.95e-60												FBgn0040773	COX7C	-1.31671	3.24e-79		FBgn0016120	ATPsynD	-1.46827	1.25e-182
	FBgn0001989	ND-B17	-1.36739	1.12e-56												FBgn0031247	CG11562	-1.3023	9.38e-14		FBgn0019644	ATPsynB	-1.2077	1.33e-155
	FBgn0035046	ND-19	-1.36638	2.07e-81												FBgn0031830	COX5B	-1.22763	9.2e-148		FBgn0020235	ATPsyngamma	-1.19345	4.28e-190
	FBgn0085468	ND-MWFE	-1.35031	2.39e-24
	FBgn0034576	ND-B14.7	-1.33193	6.33e-95
	FBgn0266582	ND-30	-1.32124	9.52e-87
	FBgn0029868	ND-B16.6	-1.29693	7.52e-80
	FBgn0017567	ND-23	-1.27081	5.8e-85
	FBgn0029888	ND-ASHI	-1.25689	3.76e-86
	FBgn0039909	ND-49	-1.23152	2.55e-166
	FBgn0030853	ND-24	-1.19114	5.22e-143
	FBgn0019957	ND-42	-1.16985	4.46e-148
	FBgn0031684	ND-13A	-1.15452	1.39e-29
	FBgn0034645	ND-B12	-1.0706	3.17e-46
	FBgn0030718	ND-20	-1.03832	6.96e-85
	FBgn0058002	ND-AGGG	-1.03459	1.2e-28
	FBgn0030605	ND-B18	-1.02123	7.85e-45
