# Supplementary material for: A transcription network underlies the dual genomic coordination of mitochondrial biogenesis
Source: bioRxiv preprint, doi:10.1101/2024.01.25.577217, version 3 (2024-09-16)
Supplement: Supplementary file 6 [file 577217_file20.xlsx]

## Sheet: Supplementary file 6
ID	SYMBOL	ENTREZID	annotation	distanceToTSS	seqnames	start	end	width	signalValue	qValue	peak	geneChr	geneStart	geneEnd	geneLength	geneStrand	transcriptId	Mitochondria	mtDNA_replication	Transcription_mito	RNA_metabolism_mito	Translation_mito	ETC	tsETC	Protein_import_insertion_mito	TCA	Heme_metabolism	Eye_screen	RNA_seq_log2FoldChange	RNA_seq_padj	group
FBgn0263584	asRNA:CR43609	12797867	Promoter (<=1kb)	-20	chr2L	21603	21932	330	188.049	3.67563	165	1	21952	24237	2286	1	FBtr0309810	Others	Others	Others	Others	Others	Others	Others	Others	Others	Others	NA	NA	NA	Others
FBgn0031209	Ir21a	33157	Exon (FBtr0309225/FBgn0051973, exon 5 of 11)	-10382	chr2L	35537	35866	330	157.02	2.89434	165	1	21823	25155	3333	2	FBtr0113008	Others	Others	Others	Others	Others	Others	Others	Others	Others	Others	NA	0.92201	0.104145	Others
FBgn0067779	dbr	33161	Promoter (<=1kb)	-38	chr2L	66676	67005	330	203.797	3.64904	165	1	67043	71081	4039	1	FBtr0306536	Others	Others	Others	Others	Others	Others	Others	Others	Others	Others	Others	0.134291	0.352976	Others
FBgn0031213	galectin	33162	Promoter (<=1kb)	-26	chr2L	73130	73459	330	363.259	4.10745	165	1	73485	76211	2727	1	FBtr0302164	Others	Others	Others	Others	Others	Others	Others	Others	Others	Others	NA	1.80401	2.13e-116	Others
FBgn0031214	CG11374	33163	Distal Intergenic	4906	chr2L	81254	81583	330	157.605	2.93654	165	1	76348	77783	1436	1	FBtr0306541	Others	Others	Others	Others	Others	Others	Others	Others	Others	Others	NA	5.46065	3.96e-08	Others
FBgn0031216	Zir	33165	Promoter (<=1kb)	0	chr2L	94566	94895	330	207.275	3.64237	165	1	94739	102086	7348	1	FBtr0078103	Others	Others	Others	Others	Others	Others	Others	Others	Others	Others	NA	0.462227	0.00194568	Others
FBgn0026787	Nhe1	33167	Promoter (<=1kb)	0	chr2L	106554	106883	330	155.769	2.85762	165	1	103962	106732	2771	2	FBtr0301452	Others	Others	Others	Others	Others	Others	Others	Others	Others	Others	NA	0.0302344	0.846023	Others
FBgn0005278	Sam-S	48552	Promoter (<=1kb)	0	chr2L	107729	108058	330	231.597	4.10745	165	1	107761	111337	3577	1	FBtr0308091	Others	Others	Others	Others	Others	Others	Others	Others	Others	Others	NA	0.794661	1.54e-123	Others
FBgn0031228	ND-15	33179	Promoter (<=1kb)	-35	chr2L	114527	114691	165	424.975	4.10745	89	1	114726	156030	41305	1	FBtr0306542	Mitochondria	Others	Others	Others	Others	ETC	Others	Others	Others	Others	NA	-1.74827	1.45e-89	Mito_EBR
FBgn0031219	CG13694	33169	Promoter (1-2kb)	-1288	chr2L	117776	118105	330	169.29	3.34509	165	1	115365	116488	1124	2	FBtr0078160	Others	Others	Others	Others	Others	Others	Others	Others	Others	Others	NA	0.116004	0.692393	Others
FBgn0031220	CG4822	33170	Promoter (<=1kb)	-202	chr2L	120944	121273	330	145.372	2.45679	165	1	117079	120742	3664	2	FBtr0078158	Others	Others	Others	Others	Others	Others	Others	Others	Others	Others	NA	0.180815	0.117219	Others
FBgn0025683	CG3164	33171	Promoter (<=1kb)	0	chr2L	129036	129365	330	205.863	3.64526	165	1	122624	129245	6622	2	FBtr0078154	Others	Others	Others	Others	Others	Others	Others	Others	Others	Others	NA	NA	NA	Others
FBgn0001142	Gs1	33172	Promoter (<=1kb)	0	chr2L	131883	132212	330	140.388	2.34449	165	1	132077	133995	1919	1	FBtr0300568	Mitochondria	Others	Others	Others	Others	Others	Others	Others	Others	Others	NA	-0.270532	1.93e-09	MitoOthers
FBgn0031224	CG11454	33175	Promoter (<=1kb)	0	chr2L	143185	143343	159	428.409	4.10745	107	1	143323	144227	905	1	FBtr0078116	Others	Others	Others	Others	Others	Others	Others	Others	Others	Others	NA	0.102561	0.527733	Others
FBgn0031227	CG3709	33178	Promoter (<=1kb)	0	chr2L	155126	155455	330	169.568	3.34464	165	1	153539	155305	1767	2	FBtr0078147	Others	Others	Others	Others	Others	Others	Others	Others	Others	Others	NA	-1.1338	2.82e-09	Others
FBgn0031229	CG3436	33180	Promoter (<=1kb)	0	chr2L	155991	156198	208	414.886	4.10745	113	1	156029	157666	1638	1	FBtr0340650	Others	Others	Others	Others	Others	Others	Others	Others	Others	Others	NA	-0.673838	4.81e-07	Others
FBgn0016977	spen	44205	Promoter (<=1kb)	0	chr2L	158868	159052	185	403.037	4.10745	82	1	159032	201588	42557	1	FBtr0078122	Others	Others	Others	Others	Others	Others	Others	Others	Others	Others	NA	1.04328	1.99e-94	Others
FBgn0016977	spen	44205	Promoter (2-3kb)	2207	chr2L	161239	161568	330	267.943	4.10745	165	1	159032	203397	44366	1	FBtr0078121	Others	Others	Others	Others	Others	Others	Others	Others	Others	Others	NA	1.04328	1.99e-94	Others
FBgn0016977	spen	44205	Intron (FBtr0078122/FBgn0016977, intron 2 of 11)	7570	chr2L	166602	166759	158	334.684	4.10745	78	1	159032	203397	44366	1	FBtr0078121	Others	Others	Others	Others	Others	Others	Others	Others	Others	Others	NA	1.04328	1.99e-94	Others
FBgn0031232	CG11617	33183	Promoter (<=1kb)	0	chr2L	207254	207483	230	695.867	4.10745	114	1	204743	207297	2555	2	FBtr0078146	Others	Others	Others	Others	Others	Others	Others	Others	Others	Others	Others	-0.263457	0.157745	Others
FBgn0266557	kis	33185	Promoter (1-2kb)	1100	chr2L	220754	220862	109	286.468	4.10745	34	1	210735	221962	11228	2	FBtr0078145	Others	Others	Others	Others	Others	Others	Others	Others	Others	Others	NA	0.353858	5.56e-07	Others
FBgn0266557	kis	33185	Promoter (<=1kb)	0	chr2L	221702	222031	330	209.553	3.63726	165	1	210735	221962	11228	2	FBtr0078145	Others	Others	Others	Others	Others	Others	Others	Others	Others	Others	NA	0.353858	5.56e-07	Others
FBgn0265153	lncRNA:CR44222	14462647	Promoter (<=1kb)	0	chr2L	223429	223661	233	784.287	4.10745	111	1	223519	224708	1190	1	FBtr0336985	Others	Others	Others	Others	Others	Others	Others	Others	Others	Others	NA	NA	NA	Others
FBgn0265153	lncRNA:CR44222	14462647	Promoter (1-2kb)	1384	chr2L	224903	225047	145	339.545	4.10745	7	1	223519	224708	1190	1	FBtr0336985	Others	Others	Others	Others	Others	Others	Others	Others	Others	Others	NA	NA	NA	Others
FBgn0266557	kis	33185	Promoter (<=1kb)	0	chr2L	250798	251043	246	566.295	4.10745	124	1	210735	250823	40089	2	FBtr0078144	Others	Others	Others	Others	Others	Others	Others	Others	Others	Others	NA	0.353858	5.56e-07	Others
FBgn0283652	Rpp30	44392	Promoter (<=1kb)	0	chr2L	252370	252451	82	141.684	2.36288	35	1	251039	252373	1335	2	FBtr0336990	Others	Others	Others	Others	Others	Others	Others	Others	Others	Others	NA	-0.65458	0.00181684	Others
FBgn0031239	CG17075	33191	Promoter (<=1kb)	-27	chr2L	267532	267787	256	721.274	4.10745	127	1	263466	267505	4040	2	FBtr0078142	Others	Others	Others	Others	Others	Others	Others	Others	Others	Others	NA	1.67258	1.5e-09	Others
FBgn0031238	CG3645	33190	Promoter (<=1kb)	0	chr2L	271679	271805	127	371.583	4.10745	80	1	252589	271744	19156	2	FBtr0078140	Others	Others	Others	Others	Others	Others	Others	Others	Others	Others	NA	-0.420784	0.000352766	Others
FBgn0086855	CG17078	33195	Promoter (<=1kb)	-10	chr2L	277222	277520	299	749.071	4.10745	146	1	274740	277212	2473	2	FBtr0330649	Others	Others	Others	Others	Others	Others	Others	Others	Others	Others	NA	-0.406548	0.00110243	Others
FBgn0031244	CG11601	33197	Promoter (<=1kb)	0	chr2L	283226	283336	111	389.626	4.10745	86	1	281971	283269	1299	2	FBtr0078137	Others	Others	Others	Others	Others	Others	Others	Others	Others	Others	NA	0.393738	0.0061783	Others
FBgn0031245	CG3625	33198	Promoter (<=1kb)	-1	chr2L	285727	285943	217	475.793	4.10745	61	1	283385	285726	2342	2	FBtr0078136	Others	Others	Others	Others	Others	Others	Others	Others	Others	Others	NA	-0.282506	4.07e-06	Others
FBgn0031245	CG3625	33198	Promoter (<=1kb)	-38	chr2L	286569	286667	99	352.363	4.10745	55	1	283662	286531	2870	2	FBtr0078135	Others	Others	Others	Others	Others	Others	Others	Others	Others	Others	NA	-0.282506	4.07e-06	Others
FBgn0031247	CG11562	33200	Promoter (<=1kb)	0	chr2L	292215	292544	330	280.493	4.10745	165	1	292419	293222	804	1	FBtr0078130	Mitochondria	Others	Others	Others	Others	ETC	Others	Others	Others	Others	NA	-1.3023	9.38e-14	Mito_EBR
FBgn0017457	U2af38	33201	Promoter (<=1kb)	0	chr2L	294448	294777	330	202.309	3.6517	165	1	292959	294681	1723	2	FBtr0333408	Others	Others	Others	Others	Others	Others	Others	Others	Others	Others	NA	-0.877108	2.48e-08	Others
FBgn0024352	Stip1	33202	Promoter (<=1kb)	0	chr2L	294979	295167	189	300.397	4.10745	119	1	295122	297449	2328	1	FBtr0078131	Others	Others	Others	Others	Others	Others	Others	Others	Others	Others	NA	-1.1388	9.23e-106	Others
FBgn0020622	Pi3K21B	33203	Promoter (<=1kb)	0	chr2L	297666	297996	331	760.969	4.10745	212	1	297880	303934	6055	1	FBtr0331205	Others	Others	Others	Others	Others	Others	Others	Others	Others	Others	NA	0.289207	0.00400407	Others
FBgn0004611	Plc21C	33204	Promoter (<=1kb)	-12	chr2L	305664	305923	260	692.333	4.10745	92	1	305935	346255	40321	1	FBtr0078047	Others	Others	Others	Others	Others	Others	Others	Others	Others	Others	NA	0.867201	2.86e-14	Others
FBgn0004611	Plc21C	33204	Promoter (1-2kb)	1878	chr2L	312078	312407	330	145.284	2.45694	165	1	310200	347927	37728	1	FBtr0078050	Others	Others	Others	Others	Others	Others	Others	Others	Others	Others	NA	0.867201	2.86e-14	Others
FBgn0031250	Ent1	33207	Promoter (<=1kb)	0	chr2L	357855	358026	172	480.642	4.10745	77	1	355565	357874	2310	2	FBtr0078094	Others	Others	Others	Others	Others	Others	Others	Others	Others	Others	NA	0.794101	1.73e-14	Others
FBgn0000061	al	33208	Intron (FBtr0078053/FBgn0000061, intron 1 of 4)	4733	chr2L	382845	383174	330	148.167	2.48054	165	1	378112	387439	9328	1	FBtr0078053	Others	Others	Others	Others	Others	Others	Others	Others	Others	Others	Others	-0.586178	0.07951	Others
FBgn0263933	ebi	33212	Promoter (<=1kb)	0	chr2L	414753	415076	324	953.754	4.10745	154	1	415067	418536	3470	1	FBtr0078055	Others	Others	Others	Others	Others	Others	Others	Others	Others	Others	NA	-0.21154	0.0325747	Others
FBgn0002593	RpLP1	33214	Promoter (<=1kb)	0	chr2L	419782	420013	232	475.195	4.10745	157	1	419952	420697	746	1	FBtr0078056	Others	Others	Others	Others	Others	Others	Others	Others	Others	Others	NA	-0.548809	3.2e-37	Others
FBgn0031253	CG11885	33215	Promoter (<=1kb)	0	chr2L	421386	421662	277	931.46	4.10745	135	1	420895	421450	556	2	FBtr0078089	Others	Others	Others	Others	Others	Others	Others	Others	Others	Others	NA	-0.632369	0.0508399	Others
FBgn0031255	BBS8	33217	Promoter (2-3kb)	2764	chr2L	425637	425769	133	267.093	4.10745	57	1	422873	425321	2449	1	FBtr0078058	Others	Others	Others	Others	Others	Others	Others	Others	Others	Others	NA	0.998741	0.094268	Others
FBgn0004583	ex	33218	Distal Intergenic	-3603	chr2L	427456	427624	169	260.79	4.10745	86	1	431227	448701	17475	1	FBtr0078059	Others	Others	Others	Others	Others	Others	Others	Others	Others	Others	NA	-0.00856045	0.938208	Others
FBgn0004583	ex	33218	Promoter (<=1kb)	-139	chr2L	430974	431088	115	192.523	3.66786	54	1	431227	448701	17475	1	FBtr0078059	Others	Others	Others	Others	Others	Others	Others	Others	Others	Others	NA	-0.00856045	0.938208	Others
FBgn0263870	lncRNA:CR43717	14462653	Promoter (2-3kb)	2426	chr2L	441965	442257	293	1590.97	4.10745	147	1	439539	440104	566	1	FBtr0329833	Others	Others	Others	Others	Others	Others	Others	Others	Others	Others	NA	NA	NA	Others
FBgn0031258	CG4297	33222	Promoter (2-3kb)	2533	chr2L	468800	469022	223	731.817	4.10745	112	1	458876	471555	12680	2	FBtr0310035	Others	Others	Others	Others	Others	Others	Others	Others	Others	Others	NA	0.246659	0.218753	Others
FBgn0031258	CG4297	33222	Promoter (1-2kb)	1275	chr2L	469951	470280	330	296.044	4.10745	165	1	458876	471555	12680	2	FBtr0310035	Others	Others	Others	Others	Others	Others	Others	Others	Others	Others	NA	0.246659	0.218753	Others
FBgn0031258	CG4297	33222	Promoter (<=1kb)	646	chr2L	470733	470909	177	236.154	4.10745	65	1	458876	471555	12680	2	FBtr0310035	Others	Others	Others	Others	Others	Others	Others	Others	Others	Others	NA	0.246659	0.218753	Others
FBgn0031258	CG4297	33222	Promoter (<=1kb)	-74	chr2L	471629	471958	330	179.51	3.69241	165	1	458876	471555	12680	2	FBtr0310035	Others	Others	Others	Others	Others	Others	Others	Others	Others	Others	NA	0.246659	0.218753	Others
FBgn0031258	CG4297	33222	Promoter (<=1kb)	-150	chr2L	472350	472624	275	1160.6	4.10745	145	1	458876	472200	13325	2	FBtr0310034	Others	Others	Others	Others	Others	Others	Others	Others	Others	Others	NA	0.246659	0.218753	Others
FBgn0027592	MED15	33223	Promoter (<=1kb)	0	chr2L	472960	473054	95	257.76	4.10745	82	1	473013	476170	3158	1	FBtr0078062	Others	Others	Others	Others	Others	Others	Others	Others	Others	Others	NA	-0.449336	0.000503726	Others
FBgn0043364	cbt	33224	Promoter (<=1kb)	-227	chr2L	479915	480225	311	2598.06	4.10745	162	1	476446	479688	3243	2	FBtr0310030	Others	Others	Others	Others	Others	Others	Others	Others	Others	Others	Others	0.443412	3.3e-09	Others
FBgn0043364	cbt	33224	Promoter (1-2kb)	-1228	chr2L	480916	481270	355	5139.38	4.10745	187	1	476446	479688	3243	2	FBtr0310030	Others	Others	Others	Others	Others	Others	Others	Others	Others	Others	Others	0.443412	3.3e-09	Others
FBgn0043364	cbt	33224	Promoter (2-3kb)	-2176	chr2L	481864	482077	214	478.151	4.10745	88	1	476446	479688	3243	2	FBtr0310030	Others	Others	Others	Others	Others	Others	Others	Others	Others	Others	Others	0.443412	3.3e-09	Others
FBgn0043364	cbt	33224	Intron (FBtr0333012/FBgn0003963, intron 1 of 7)	-4527	chr2L	484215	484544	330	204.074	3.64846	165	1	476446	479688	3243	2	FBtr0310030	Others	Others	Others	Others	Others	Others	Others	Others	Others	Others	Others	0.443412	3.3e-09	Others
FBgn0003963	ush	33225	Intron (FBtr0333012/FBgn0003963, intron 1 of 7)	-4827	chr2L	485738	486008	271	944.536	4.10745	147	1	490835	540532	49698	1	FBtr0310027	Others	Others	Others	Others	Others	Others	Others	Others	Others	Others	En	0.0872973	0.866469	Others
FBgn0003963	ush	33225	Promoter (<=1kb)	-444	chr2L	490175	490391	217	355.513	4.10745	113	1	490835	540532	49698	1	FBtr0310027	Others	Others	Others	Others	Others	Others	Others	Others	Others	Others	En	0.0872973	0.866469	Others
FBgn0267992	lncRNA:CR46259	26067569	Intron (FBtr0333012/FBgn0003963, intron 1 of 7)	-8248	chr2L	510484	510699	216	515.068	4.10745	121	1	500873	502236	1364	2	FBtr0347591	Others	Others	Others	Others	Others	Others	Others	Others	Others	Others	NA	NA	NA	Others
FBgn0267992	lncRNA:CR46259	26067569	Intron (FBtr0333012/FBgn0003963, intron 1 of 7)	-9915	chr2L	512151	512337	187	354.008	4.10745	112	1	500873	502236	1364	2	FBtr0347591	Others	Others	Others	Others	Others	Others	Others	Others	Others	Others	NA	NA	NA	Others
FBgn0003963	ush	33225	Intron (FBtr0333012/FBgn0003963, intron 1 of 7)	-10193	chr2L	512944	513273	330	229.545	4.10745	165	1	523466	540560	17095	1	FBtr0078063	Others	Others	Others	Others	Others	Others	Others	Others	Others	Others	En	0.0872973	0.866469	Others
FBgn0003963	ush	33225	Intron (FBtr0333012/FBgn0003963, intron 1 of 7)	-7112	chr2L	516078	516354	277	1247.36	4.10745	160	1	523466	540560	17095	1	FBtr0078063	Others	Others	Others	Others	Others	Others	Others	Others	Others	Others	En	0.0872973	0.866469	Others
FBgn0003963	ush	33225	Promoter (2-3kb)	-2492	chr2L	520702	520974	273	1455.11	4.10745	151	1	523466	540560	17095	1	FBtr0078063	Others	Others	Others	Others	Others	Others	Others	Others	Others	Others	En	0.0872973	0.866469	Others
FBgn0003963	ush	33225	Promoter (1-2kb)	-1697	chr2L	521440	521769	330	168.365	3.34705	165	1	523466	540560	17095	1	FBtr0078063	Others	Others	Others	Others	Others	Others	Others	Others	Others	Others	En	0.0872973	0.866469	Others
FBgn0003963	ush	33225	Promoter (1-2kb)	-1223	chr2L	521974	522243	270	1347.39	4.10745	149	1	523466	540560	17095	1	FBtr0078063	Others	Others	Others	Others	Others	Others	Others	Others	Others	Others	En	0.0872973	0.866469	Others
FBgn0003963	ush	33225	Promoter (<=1kb)	-413	chr2L	522878	523053	176	280.563	4.10745	96	1	523466	540560	17095	1	FBtr0078063	Others	Others	Others	Others	Others	Others	Others	Others	Others	Others	En	0.0872973	0.866469	Others
FBgn0003963	ush	33225	Promoter (<=1kb)	0	chr2L	523573	523902	330	277.627	4.10745	165	1	523736	540560	16825	1	FBtr0329895	Others	Others	Others	Others	Others	Others	Others	Others	Others	Others	En	0.0872973	0.866469	Others
FBgn0003963	ush	33225	Intron (FBtr0333012/FBgn0003963, intron 2 of 7)	3245	chr2L	526981	527310	330	183.864	3.68404	165	1	523736	540560	16825	1	FBtr0329895	Others	Others	Others	Others	Others	Others	Others	Others	Others	Others	En	0.0872973	0.866469	Others
FBgn0010602	lwr	33226	Promoter (1-2kb)	1828	chr2L	540559	540752	194	262.333	4.10745	86	1	540599	542580	1982	2	FBtr0310028	Others	Others	Others	Others	Others	Others	Others	Others	Others	Others	NA	-0.783982	9.58e-35	Others
FBgn0010602	lwr	33226	Promoter (1-2kb)	1347	chr2L	540990	541233	244	595.635	4.10745	108	1	540599	542580	1982	2	FBtr0310028	Others	Others	Others	Others	Others	Others	Others	Others	Others	Others	NA	-0.783982	9.58e-35	Others
FBgn0010602	lwr	33226	Promoter (<=1kb)	0	chr2L	542435	542764	330	237.7	4.10745	165	1	540599	542580	1982	2	FBtr0310028	Others	Others	Others	Others	Others	Others	Others	Others	Others	Others	NA	-0.783982	9.58e-35	Others
FBgn0031260	Spp	33227	Promoter (<=1kb)	0	chr2L	544625	544787	163	532.118	4.10745	64	1	542786	544653	1868	2	FBtr0078080	Others	Others	Others	Others	Others	Others	Others	Others	Others	Others	NA	-1.38204	8.92e-197	Others
FBgn0260933	rempA	33230	Promoter (<=1kb)	0	chr2L	560186	560515	330	186.079	3.67952	165	1	553742	560310	6569	2	FBtr0303763	Others	Others	Others	Others	Others	Others	Others	Others	Others	Others	NA	2.07873	1.29e-07	Others
FBgn0031265	CG2794	33233	Promoter (<=1kb)	0	chr2L	564034	564216	183	484.441	4.10745	88	1	564163	566472	2310	1	FBtr0078067	Others	Others	Others	Others	Others	Others	Others	Others	Others	Others	NA	-0.191077	0.0279075	Others
FBgn0021874	Nle	33234	Promoter (<=1kb)	0	chr2L	568094	568365	272	650.757	4.10745	162	1	566366	568121	1756	2	FBtr0078075	Others	Others	Others	Others	Others	Others	Others	Others	Others	Others	NA	-0.341924	0.000273987	Others
FBgn0031268	cold	33237	Promoter (<=1kb)	0	chr2L	574267	574550	284	303.181	4.10745	161	1	574291	575734	1444	1	FBtr0310022	Others	Others	Others	Others	Others	Others	Others	Others	Others	Others	NA	0.255477	0.0229706	Others
FBgn0031270	CG13689	33241	Promoter (<=1kb)	-213	chr2L	602425	602600	176	256.831	4.10745	105	1	602813	603562	750	1	FBtr0078071	Others	Others	Others	Others	Others	Others	Others	Others	Others	Others	NA	0.696425	0.0712578	Others
FBgn0031270	CG13689	33241	Promoter (1-2kb)	1324	chr2L	604137	604466	330	219.241	4.10745	165	1	602813	604430	1618	1	FBtr0310023	Others	Others	Others	Others	Others	Others	Others	Others	Others	Others	NA	0.696425	0.0712578	Others
FBgn0263657	lncRNA:CR43648	14462654	Promoter (<=1kb)	374	chr2L	606288	606484	197	364.692	4.10745	87	1	605914	606412	499	1	FBtr0343219	Others	Others	Others	Others	Others	Others	Others	Others	Others	Others	NA	NA	NA	Others
FBgn0266323	lncRNA:CR44988	19836079	Intron (FBtr0078045/FBgn0284247, intron 2 of 11)	-27198	chr2L	683208	683370	163	220.876	4.10745	71	1	710568	715307	4740	1	FBtr0344054	Others	Others	Others	Others	Others	Others	Others	Others	Others	Others	NA	NA	NA	Others
FBgn0266323	lncRNA:CR44988	19836079	Promoter (1-2kb)	1754	chr2L	712322	712651	330	188.783	3.67471	165	1	710568	715307	4740	1	FBtr0344054	Others	Others	Others	Others	Others	Others	Others	Others	Others	Others	NA	NA	NA	Others
FBgn0284247	ds	33245	Promoter (<=1kb)	-431	chr2L	715414	715728	315	2293.58	4.10745	149	1	640306	714983	74678	2	FBtr0343249	Others	Others	Others	Others	Others	Others	Others	Others	Others	Others	NA	-0.232889	0.0842336	Others
FBgn0284247	ds	33245	Promoter (1-2kb)	-1756	chr2L	716739	716855	117	241.241	4.10745	82	1	640306	714983	74678	2	FBtr0343249	Others	Others	Others	Others	Others	Others	Others	Others	Others	Others	NA	-0.232889	0.0842336	Others
FBgn0284247	ds	33245	Distal Intergenic	-3593	chr2L	718576	718740	165	314.904	4.10745	79	1	640306	714983	74678	2	FBtr0343249	Others	Others	Others	Others	Others	Others	Others	Others	Others	Others	NA	-0.232889	0.0842336	Others
FBgn0026438	Eaat2	33247	Promoter (1-2kb)	1469	chr2L	740202	740322	121	365.86	4.10745	37	1	737212	741791	4580	2	FBtr0301316	Others	Others	Others	Others	Others	Others	Others	Others	Others	Others	NA	1.43156	1.32e-23	Others
FBgn0051658	Nnf1b	318874	Promoter (<=1kb)	0	chr2L	810312	810641	330	154.801	2.82376	165	1	810577	811531	955	1	FBtr0078008	Others	Others	Others	Others	Others	Others	Others	Others	Others	Others	NA	0.271955	0.731611	Others
FBgn0031281	Saf6	33255	Promoter (<=1kb)	0	chr2L	815826	816155	330	271.303	4.10745	165	1	813314	815950	2637	2	FBtr0078041	Others	Others	Others	Others	Others	Others	Others	Others	Others	Others	NA	-0.400586	0.0751689	Others
FBgn0015621	Clp	33259	Promoter (<=1kb)	-75	chr2L	819729	819889	161	294.76	4.10745	50	1	819964	821209	1246	1	FBtr0078011	Others	Others	Others	Others	Others	Others	Others	Others	Others	Others	NA	-0.525021	0.000745575	Others
FBgn0031285	CG3662	33260	Promoter (<=1kb)	0	chr2L	821281	821487	207	664.718	4.10745	110	1	821289	824337	3049	1	FBtr0305507	Others	Others	Others	Others	Others	Others	Others	Others	Others	Others	NA	1.16866	2.25e-155	Others
FBgn0010583	dock	33262	Promoter (<=1kb)	0	chr2L	825817	826006	190	606.426	4.10745	110	1	825969	832331	6363	1	FBtr0332973	Others	Others	Others	Others	Others	Others	Others	Others	Others	Others	NA	0.0708498	0.516323	Others
FBgn0010583	dock	33262	Promoter (1-2kb)	1565	chr2L	827534	827780	247	509.434	4.10745	126	1	825969	833241	7273	1	FBtr0078015	Others	Others	Others	Others	Others	Others	Others	Others	Others	Others	NA	0.0708498	0.516323	Others
FBgn0020304	drongo	33263	Intron (FBtr0302121/FBgn0020304, intron 1 of 5)	4659	chr2L	838083	838284	202	645.035	4.10745	109	1	833584	842943	9360	2	FBtr0302121	Others	Others	Others	Others	Others	Others	Others	Others	Others	Others	NA	1.2463	2.34e-33	Others
FBgn0020304	drongo	33263	Promoter (<=1kb)	923	chr2L	841815	842020	206	699.765	4.10745	106	1	833584	842943	9360	2	FBtr0302121	Others	Others	Others	Others	Others	Others	Others	Others	Others	Others	NA	1.2463	2.34e-33	Others
FBgn0020304	drongo	33263	Promoter (2-3kb)	-2472	chr2L	845415	845658	244	1252.53	4.10745	105	1	833587	842943	9357	2	FBtr0078037	Others	Others	Others	Others	Others	Others	Others	Others	Others	Others	NA	1.2463	2.34e-33	Others
FBgn0020304	drongo	33263	Intron (FBtr0302120/FBgn0020304, intron 1 of 5)	-3260	chr2L	846203	846463	261	810.621	4.10745	129	1	833587	842943	9357	2	FBtr0078037	Others	Others	Others	Others	Others	Others	Others	Others	Others	Others	NA	1.2463	2.34e-33	Others
FBgn0020304	drongo	33263	Promoter (<=1kb)	0	chr2L	851035	851275	241	805.872	4.10745	93	1	833584	851071	17488	2	FBtr0302120	Others	Others	Others	Others	Others	Others	Others	Others	Others	Others	NA	1.2463	2.34e-33	Others
FBgn0020545	kraken	33265	Promoter (<=1kb)	0	chr2L	852648	852851	204	662.323	4.10745	122	1	852768	854539	1772	1	FBtr0078016	Mitochondria	Others	Others	Others	Others	Others	Others	Others	Others	Others	NA	1.19333	5.84e-156	MitoOthers
FBgn0031288	CG13949	33266	Promoter (<=1kb)	0	chr2L	855281	855501	221	526.395	4.10745	102	1	855337	856236	900	1	FBtr0078017	Others	Others	Others	Others	Others	Others	Others	Others	Others	Others	NA	NA	NA	Others
FBgn0031288	CG13949	33266	Promoter (<=1kb)	579	chr2L	856050	856379	330	270.891	4.10745	165	1	855471	856639	1169	1	FBtr0334796	Others	Others	Others	Others	Others	Others	Others	Others	Others	Others	NA	NA	NA	Others
FBgn0266884	lncRNA:CR45345	19835464	Promoter (<=1kb)	-448	chr2L	856703	856955	253	1187.72	4.10745	137	1	857403	860079	2677	1	FBtr0445831	Others	Others	Others	Others	Others	Others	Others	Others	Others	Others	NA	NA	NA	Others
FBgn0262177	mir-375	12797871	Promoter (<=1kb)	661	chr2L	858203	858422	220	687.468	4.10745	110	1	857542	857632	91	1	FBtr0304182	Others	Others	Others	Others	Others	Others	Others	Others	Others	Others	NA	NA	NA	Others
FBgn0031289	CG13950	33267	Promoter (<=1kb)	-949	chr2L	858919	859248	330	182.754	3.68643	165	1	860197	861806	1610	1	FBtr0445832	Others	Others	Others	Others	Others	Others	Others	Others	Others	Others	NA	1.08474	3.67e-05	Others
FBgn0029095	aru	33268	Promoter (<=1kb)	-46	chr2L	865907	866199	293	2219.5	4.10745	162	1	861849	865861	4013	2	FBtr0078033	Others	Others	Others	Others	Others	Others	Others	Others	Others	Others	NA	0.496047	2.56e-11	Others
FBgn0029095	aru	33268	Promoter (<=1kb)	377	chr2L	867369	867636	268	1276.2	4.10745	122	1	861849	868013	6165	2	FBtr0078032	Others	Others	Others	Others	Others	Others	Others	Others	Others	Others	NA	0.496047	2.56e-11	Others
FBgn0029095	aru	33268	Promoter (<=1kb)	-93	chr2L	868447	868595	149	212.125	3.63229	62	1	861849	868354	6506	2	FBtr0078031	Others	Others	Others	Others	Others	Others	Others	Others	Others	Others	NA	0.496047	2.56e-11	Others
FBgn0020305	dbe	33269	Promoter (<=1kb)	0	chr2L	869845	869945	101	230.243	4.10745	13	1	868673	869857	1185	2	FBtr0078030	Others	Others	Others	Others	Others	Others	Others	Others	Others	Others	NA	-1.16279	7.19e-29	Others
FBgn0053526	PNUTS	33270	Promoter (<=1kb)	0	chr2L	870850	871113	264	576.86	4.10745	120	1	871095	874149	3055	1	FBtr0091486	Others	Others	Others	Others	Others	Others	Others	Others	Others	Others	NA	1.13959	3.49e-124	Others
FBgn0053526	PNUTS	33270	Promoter (<=1kb)	412	chr2L	871507	871629	123	344.31	4.10745	76	1	871095	874149	3055	1	FBtr0091486	Others	Others	Others	Others	Others	Others	Others	Others	Others	Others	NA	1.13959	3.49e-124	Others
FBgn0031292	CG15824	33272	Distal Intergenic	-4752	chr2L	889893	890121	229	619.648	4.10745	116	1	878181	885141	6961	2	FBtr0332181	Others	Others	Others	Others	Others	Others	Others	Others	Others	Others	NA	0.193037	0.907859	Others
FBgn0266887	lncRNA:CR45348	19835631	Distal Intergenic	5325	chr2L	892570	892725	156	302.217	4.10745	81	1	897453	898050	598	2	FBtr0345739	Others	Others	Others	Others	Others	Others	Others	Others	Others	Others	NA	NA	NA	Others
FBgn0266887	lncRNA:CR45348	19835631	Promoter (2-3kb)	2264	chr2L	895457	895786	330	196.224	3.6626	165	1	897453	898050	598	2	FBtr0345739	Others	Others	Others	Others	Others	Others	Others	Others	Others	Others	NA	NA	NA	Others
FBgn0266887	lncRNA:CR45348	19835631	Promoter (<=1kb)	661	chr2L	897260	897389	130	275.518	4.10745	74	1	897453	898050	598	2	FBtr0345739	Others	Others	Others	Others	Others	Others	Others	Others	Others	Others	NA	NA	NA	Others
FBgn0003916	snRNA:U1:21D	3772520	Promoter (<=1kb)	0	chr2L	901339	901668	330	309.235	4.10745	165	1	901491	901654	164	2	FBtr0078028	Others	Others	Others	Others	Others	Others	Others	Others	Others	Others	NA	NA	NA	Others
FBgn0266799	lncRNA:CR45261	19835568	Distal Intergenic	3257	chr2L	907286	907615	330	145.427	2.45659	165	1	904029	904347	319	1	FBtr0345455	Others	Others	Others	Others	Others	Others	Others	Others	Others	Others	NA	NA	NA	Others
FBgn0028481	CG4341	33276	Intron (FBtr0077949/FBgn0028481, intron 2 of 10)	13154	chr2L	935947	936039	93	157.895	2.9359	62	1	922793	958098	35306	1	FBtr0305064	Others	Others	Others	Others	Others	Others	Others	Others	Others	Others	NA	1.72538	7.59e-31	Others
FBgn0028481	CG4341	33276	Intron (FBtr0077949/FBgn0028481, intron 2 of 10)	14246	chr2L	937039	937194	156	255.403	4.10745	78	1	922793	958098	35306	1	FBtr0305064	Others	Others	Others	Others	Others	Others	Others	Others	Others	Others	NA	1.72538	7.59e-31	Others
FBgn0266036	lncRNA:CR44801	19834880	Distal Intergenic	16954	chr2L	974218	974346	129	250.621	4.10745	77	1	987807	991300	3494	2	FBtr0343253	Others	Others	Others	Others	Others	Others	Others	Others	Others	Others	NA	NA	NA	Others
FBgn0266036	lncRNA:CR44801	19834880	Distal Intergenic	-15289	chr2L	1006589	1006719	131	302.886	4.10745	114	1	987807	991300	3494	2	FBtr0445830	Others	Others	Others	Others	Others	Others	Others	Others	Others	Others	NA	NA	NA	Others
FBgn0031294	IA-2	33277	Promoter (1-2kb)	-1313	chr2L	1049366	1049695	330	150.138	2.5597	165	1	1008378	1048053	39676	2	FBtr0301417	Others	Others	Others	Others	Others	Others	Others	Others	Others	Others	NA	2.14611	3.22e-252	Others
FBgn0003310	S	33281	Intron (FBtr0077993/FBgn0003310, intron 1 of 4)	14678	chr2L	1062975	1063133	159	262.158	4.10745	85	1	1051792	1077811	26020	2	FBtr0077994	Others	Others	Others	Others	Others	Others	Others	Others	Others	Others	NA	0.8604	8.1e-06	Others
FBgn0003310	S	33281	Intron (FBtr0077993/FBgn0003310, intron 1 of 4)	12517	chr2L	1065127	1065294	168	416.527	4.10745	73	1	1051792	1077811	26020	2	FBtr0077994	Others	Others	Others	Others	Others	Others	Others	Others	Others	Others	NA	0.8604	8.1e-06	Others
FBgn0003310	S	33281	Intron (FBtr0077993/FBgn0003310, intron 1 of 4)	7173	chr2L	1070479	1070638	160	304.033	4.10745	76	1	1051792	1077811	26020	2	FBtr0077994	Others	Others	Others	Others	Others	Others	Others	Others	Others	Others	NA	0.8604	8.1e-06	Others
FBgn0003310	S	33281	Intron (FBtr0077993/FBgn0003310, intron 1 of 4)	6599	chr2L	1071101	1071212	112	158.073	2.93548	46	1	1051792	1077811	26020	2	FBtr0077994	Others	Others	Others	Others	Others	Others	Others	Others	Others	Others	NA	0.8604	8.1e-06	Others
FBgn0003310	S	33281	Intron (FBtr0077993/FBgn0003310, intron 1 of 4)	5271	chr2L	1072190	1072540	351	1551.69	4.10745	198	1	1051792	1077811	26020	2	FBtr0077994	Others	Others	Others	Others	Others	Others	Others	Others	Others	Others	NA	0.8604	8.1e-06	Others
FBgn0003310	S	33281	Promoter (2-3kb)	2975	chr2L	1074558	1074836	279	1502.77	4.10745	129	1	1051792	1077811	26020	2	FBtr0077994	Others	Others	Others	Others	Others	Others	Others	Others	Others	Others	NA	0.8604	8.1e-06	Others
FBgn0003310	S	33281	Promoter (1-2kb)	1697	chr2L	1075815	1076114	300	2885.05	4.10745	150	1	1051792	1077811	26020	2	FBtr0077994	Others	Others	Others	Others	Others	Others	Others	Others	Others	Others	NA	0.8604	8.1e-06	Others
FBgn0003310	S	33281	Promoter (<=1kb)	0	chr2L	1077801	1078017	217	794.049	4.10745	99	1	1049674	1077815	28142	2	FBtr0077993	Others	Others	Others	Others	Others	Others	Others	Others	Others	Others	NA	0.8604	8.1e-06	Others
FBgn0031299	CG4629	33284	Intron (FBtr0332570/FBgn0031299, intron 2 of 8)	10509	chr2L	1091666	1091995	330	158.35	2.93463	165	1	1083091	1102504	19414	2	FBtr0332570	Others	Others	Others	Others	Others	Others	Others	Others	Others	Others	NA	0.432689	0.184035	Others
FBgn0031299	CG4629	33284	Intron (FBtr0332570/FBgn0031299, intron 2 of 8)	7493	chr2L	1094775	1095011	237	337.849	4.10745	104	1	1083091	1102504	19414	2	FBtr0332570	Others	Others	Others	Others	Others	Others	Others	Others	Others	Others	NA	0.432689	0.184035	Others
FBgn0016926	Pino	33288	Promoter (<=1kb)	-331	chr2L	1119362	1119589	228	699.766	4.10745	94	1	1114654	1119031	4378	2	FBtr0332272	Others	Others	Others	Others	Others	Others	Others	Others	Others	Others	NA	0.863099	2.44e-67	Others
FBgn0016926	Pino	33288	Promoter (2-3kb)	-2920	chr2L	1121951	1122280	330	213.923	4.10745	165	1	1114654	1119031	4378	2	FBtr0332272	Others	Others	Others	Others	Others	Others	Others	Others	Others	Others	NA	0.863099	2.44e-67	Others
FBgn0016926	Pino	33288	Intron (FBtr0077987/FBgn0016926, intron 2 of 4)	-4454	chr2L	1123485	1123634	150	308.843	4.10745	50	1	1114654	1119031	4378	2	FBtr0332272	Others	Others	Others	Others	Others	Others	Others	Others	Others	Others	NA	0.863099	2.44e-67	Others
FBgn0016926	Pino	33288	Intron (FBtr0077987/FBgn0016926, intron 2 of 4)	-4588	chr2L	1123619	1123804	186	172.626	3.48456	116	1	1114654	1119031	4378	2	FBtr0332272	Others	Others	Others	Others	Others	Others	Others	Others	Others	Others	NA	0.863099	2.44e-67	Others
FBgn0031304	TBC1D23	33289	Promoter (<=1kb)	-5	chr2L	1129173	1129311	139	153.16	2.7347	65	1	1129316	1132411	3096	1	FBtr0077956	Others	Others	Others	Others	Others	Others	Others	Others	Others	Others	NA	0.217148	0.116418	Others
FBgn0267281	lncRNA:CR45717	19835078	Promoter (<=1kb)	0	chr2L	1142722	1142931	210	642.123	4.10745	100	1	1142869	1143216	348	1	FBtr0346497	Others	Others	Others	Others	Others	Others	Others	Others	Others	Others	NA	NA	NA	Others
FBgn0031307	MFS3	33292	Promoter (1-2kb)	1262	chr2L	1144463	1144665	203	595.341	4.10745	109	1	1143201	1147395	4195	1	FBtr0077958	Others	Others	Others	Others	Others	Others	Others	Others	Others	Others	NA	-0.0777929	0.300304	Others
FBgn0031307	MFS3	33292	Promoter (1-2kb)	1854	chr2L	1145055	1145229	175	458.088	4.10745	90	1	1143201	1147395	4195	1	FBtr0077958	Others	Others	Others	Others	Others	Others	Others	Others	Others	Others	NA	-0.0777929	0.300304	Others
FBgn0261458	capt	45233	Promoter (<=1kb)	-547	chr2L	1156858	1156980	123	203.179	3.64995	50	1	1151678	1156311	4634	2	FBtr0332274	Others	Others	Others	Others	Others	Others	Others	Others	Others	Others	NA	-0.564968	9.77e-13	Others
FBgn0261458	capt	45233	Promoter (<=1kb)	0	chr2L	1158222	1158402	181	248.698	4.10745	49	1	1151678	1158262	6585	2	FBtr0100022	Others	Others	Others	Others	Others	Others	Others	Others	Others	Others	NA	-0.564968	9.77e-13	Others
FBgn0031322	CG5001	33308	Promoter (<=1kb)	0	chr2L	1185625	1185865	241	737.803	4.10745	142	1	1185757	1196807	11051	1	FBtr0307056	Others	Others	Others	Others	Others	Others	Others	Others	Others	Others	NA	-0.641034	2.45e-35	Others
FBgn0031324	CG14342	33310	Distal Intergenic	3331	chr2L	1207546	1207751	206	520.98	4.10745	101	1	1204215	1205250	1036	1	FBtr0114498	Others	Others	Others	Others	Others	Others	Others	Others	Others	Others	NA	0.447888	0.681174	Others
FBgn0266885	lncRNA:CR45346	19835817	Promoter (1-2kb)	1424	chr2L	1213709	1213869	161	271.132	4.10745	66	1	1214649	1215293	645	2	FBtr0345742	Others	Others	Others	Others	Others	Others	Others	Others	Others	Others	NA	NA	NA	Others
FBgn0266885	lncRNA:CR45346	19835817	Promoter (<=1kb)	522	chr2L	1214589	1214771	183	330.002	4.10745	88	1	1214649	1215293	645	2	FBtr0345742	Others	Others	Others	Others	Others	Others	Others	Others	Others	Others	NA	NA	NA	Others
FBgn0262944	lncRNA:CR43263	12797874	Promoter (<=1kb)	-398	chr2L	1218183	1218392	210	373.552	4.10745	41	1	1216854	1217785	932	2	FBtr0306546	Others	Others	Others	Others	Others	Others	Others	Others	Others	Others	NA	NA	NA	Others
FBgn0031327	CG5397	33313	Distal Intergenic	-9063	chr2L	1230807	1230973	167	275.658	4.10745	71	1	1240036	1242205	2170	1	FBtr0077920	Others	Others	Others	Others	Others	Others	Others	Others	Others	Others	NA	0.0970413	0.357566	Others
FBgn0041097	robo3	33314	Intron (FBtr0077921/FBgn0041097, intron 9 of 11)	31372	chr2L	1287789	1287900	112	151.625	2.63777	47	1	1256417	1296596	40180	1	FBtr0335384	Others	Others	Others	Others	Others	Others	Others	Others	Others	Others	NA	1.69227	1.35e-15	Others
FBgn0011294	a5	33317	Distal Intergenic	-16556	chr2L	1312439	1312605	167	250.848	4.10745	90	1	1329161	1329993	833	1	FBtr0077922	Others	Others	Others	Others	Others	Others	Others	Others	Others	Others	NA	NA	NA	Others
FBgn0011294	a5	33317	Distal Intergenic	-12469	chr2L	1316523	1316692	170	327.776	4.10745	100	1	1329161	1329993	833	1	FBtr0077922	Others	Others	Others	Others	Others	Others	Others	Others	Others	Others	NA	NA	NA	Others
FBgn0053126	NLaz	33324	Promoter (<=1kb)	-522	chr2L	1362343	1362468	126	234.163	4.10745	78	1	1359837	1361821	1985	2	FBtr0343844	Others	Others	Others	Others	Others	Others	Others	Others	Others	Others	NA	1.53375	2.52e-11	Others
FBgn0031337	CG14346	33325	Promoter (1-2kb)	-1925	chr2L	1365742	1366071	330	173.651	3.48187	165	1	1367996	1369050	1055	1	FBtr0343838	Others	Others	Others	Others	Others	Others	Others	Others	Others	Others	NA	-2.21748	0.00419673	Others
FBgn0266203	lncRNA:CR44898	19835193	Intron (FBtr0077941/FBgn0002543, intron 5 of 13)	-12440	chr2L	1393766	1393899	134	240.025	4.10745	84	1	1380083	1381326	1244	2	FBtr0343843	Others	Others	Others	Others	Others	Others	Others	Others	Others	Others	NA	NA	NA	Others
FBgn0002543	robo2	44522	Intron (FBtr0077941/FBgn0002543, intron 1 of 13)	17357	chr2L	1402767	1403096	330	147.679	2.48164	165	1	1380086	1420453	40368	2	FBtr0077941	Others	Others	Others	Others	Others	Others	Others	Others	Others	Others	NA	1.14765	0.000113963	Others
FBgn0002543	robo2	44522	Intron (FBtr0077941/FBgn0002543, intron 1 of 13)	10375	chr2L	1409749	1410078	330	151.699	2.63752	165	1	1380086	1420453	40368	2	FBtr0077941	Others	Others	Others	Others	Others	Others	Others	Others	Others	Others	NA	1.14765	0.000113963	Others
FBgn0002543	robo2	44522	Promoter (<=1kb)	0	chr2L	1420257	1420586	330	337.571	4.10745	165	1	1380086	1420453	40368	2	FBtr0077941	Others	Others	Others	Others	Others	Others	Others	Others	Others	Others	NA	1.14765	0.000113963	Others
FBgn0002543	robo2	44522	Promoter (2-3kb)	-2362	chr2L	1422815	1423075	261	1066.91	4.10745	130	1	1380086	1420453	40368	2	FBtr0329985	Others	Others	Others	Others	Others	Others	Others	Others	Others	Others	NA	1.14765	0.000113963	Others
FBgn0263320	CG43401	12797875	Distal Intergenic	-3305	chr2L	1424954	1425169	216	713.658	4.10745	103	1	1428474	1428981	508	1	FBtr0308744	Others	Others	Others	Others	Others	Others	Others	Others	Others	Others	NA	NA	NA	Others
FBgn0263320	CG43401	12797875	Promoter (1-2kb)	-1403	chr2L	1426839	1427071	233	434.986	4.10745	127	1	1428474	1428981	508	1	FBtr0308744	Others	Others	Others	Others	Others	Others	Others	Others	Others	Others	NA	NA	NA	Others
FBgn0263320	CG43401	12797875	Promoter (<=1kb)	-372	chr2L	1427882	1428102	221	750.701	4.10745	105	1	1428474	1428981	508	1	FBtr0308744	Others	Others	Others	Others	Others	Others	Others	Others	Others	Others	NA	NA	NA	Others
FBgn0263320	CG43401	12797875	Promoter (<=1kb)	0	chr2L	1428426	1428606	181	269.106	4.10745	102	1	1428474	1428981	508	1	FBtr0308744	Others	Others	Others	Others	Others	Others	Others	Others	Others	Others	NA	NA	NA	Others
FBgn0003926	snRNA:U3	3772609	Promoter (1-2kb)	1025	chr2L	1433736	1434048	313	2558.63	4.10745	162	1	1432711	1432921	211	1	FBtr0077928	Others	Others	Others	Others	Others	Others	Others	Others	Others	Others	NA	NA	NA	Others
FBgn0263321	CG43402	12797876	Promoter (2-3kb)	-2262	chr2L	1440060	1440365	306	894.708	4.10745	131	1	1442627	1443832	1206	1	FBtr0343842	Others	Others	Others	Others	Others	Others	Others	Others	Others	Others	NA	2.99859	0.0133456	Others
FBgn0263321	CG43402	12797876	Promoter (2-3kb)	2444	chr2L	1445170	1445336	167	279.494	4.10745	83	1	1442726	1443316	591	1	FBtr0308745	Others	Others	Others	Others	Others	Others	Others	Others	Others	Others	NA	2.99859	0.0133456	Others
FBgn0263321	CG43402	12797876	Distal Intergenic	13608	chr2L	1456334	1456557	224	524.608	4.10745	140	1	1442726	1443316	591	1	FBtr0308745	Others	Others	Others	Others	Others	Others	Others	Others	Others	Others	NA	2.99859	0.0133456	Others
FBgn0263321	CG43402	12797876	Distal Intergenic	14192	chr2L	1456918	1457058	141	153.804	2.76195	46	1	1442726	1443316	591	1	FBtr0308745	Others	Others	Others	Others	Others	Others	Others	Others	Others	Others	NA	2.99859	0.0133456	Others
FBgn0263321	CG43402	12797876	Distal Intergenic	19414	chr2L	1462140	1462430	291	946.851	4.10745	145	1	1442726	1443316	591	1	FBtr0308745	Others	Others	Others	Others	Others	Others	Others	Others	Others	Others	NA	2.99859	0.0133456	Others
FBgn0051928	CG31928	326175	Distal Intergenic	-22029	chr2L	1470161	1470266	106	153.929	2.76154	91	1	1492295	1493645	1351	1	FBtr0077929	Others	Others	Others	Others	Others	Others	Others	Others	Others	Others	NA	6.06683	0.0433238	Others
FBgn0051928	CG31928	326175	Distal Intergenic	-21287	chr2L	1470918	1471008	91	229.223	4.10745	63	1	1492295	1493645	1351	1	FBtr0077929	Others	Others	Others	Others	Others	Others	Others	Others	Others	Others	NA	6.06683	0.0433238	Others
FBgn0051928	CG31928	326175	Distal Intergenic	-18557	chr2L	1473548	1473738	191	450.963	4.10745	107	1	1492295	1493645	1351	1	FBtr0077929	Others	Others	Others	Others	Others	Others	Others	Others	Others	Others	NA	6.06683	0.0433238	Others
FBgn0051928	CG31928	326175	Distal Intergenic	-6026	chr2L	1485940	1486269	330	212.53	3.63161	165	1	1492295	1493645	1351	1	FBtr0077929	Others	Others	Others	Others	Others	Others	Others	Others	Others	Others	NA	6.06683	0.0433238	Others
FBgn0031344	CG7420	33332	Distal Intergenic	-7016	chr2L	1509920	1510031	112	173.268	3.48279	60	1	1500835	1502904	2070	2	FBtr0077933	Others	Others	Others	Others	Others	Others	Others	Others	Others	Others	NA	-0.344307	0.204274	Others
FBgn0261509	haf	33339	Promoter (2-3kb)	2852	chr2L	1557981	1558310	330	168.139	3.2383	165	1	1555129	1609389	54261	1	FBtr0310019	Others	Others	Others	Others	Others	Others	Others	Others	Others	Others	NA	0.00914642	0.761811	Others
FBgn0261509	haf	33339	Intron (FBtr0310017/FBgn0261509, intron 2 of 9)	13525	chr2L	1568654	1568983	330	212.181	3.63209	165	1	1555129	1609389	54261	1	FBtr0310019	Others	Others	Others	Others	Others	Others	Others	Others	Others	Others	NA	0.00914642	0.761811	Others
FBgn0031347	CG10869	33337	Intron (FBtr0310017/FBgn0261509, intron 2 of 9)	7594	chr2L	1579347	1579561	215	533.372	4.10745	124	1	1584866	1587155	2290	2	FBtr0077917	Others	Others	Others	Others	Others	Others	Others	Others	Others	Others	NA	2.33659	0.0138038	Others
FBgn0031347	CG10869	33337	Intron (FBtr0310017/FBgn0261509, intron 2 of 9)	-3094	chr2L	1590249	1590472	224	682.747	4.10745	118	1	1584866	1587155	2290	2	FBtr0077917	Others	Others	Others	Others	Others	Others	Others	Others	Others	Others	NA	2.33659	0.0138038	Others
FBgn0031351	CG14352	33341	Promoter (<=1kb)	0	chr2L	1611179	1611444	266	354.431	4.10745	151	1	1611410	1612576	1167	1	FBtr0077876	Others	Others	Others	Others	Others	Others	Others	Others	Others	Others	NA	-0.12812	0.774015	Others
FBgn0021906	RFeSP	44390	Promoter (<=1kb)	0	chr2L	1614119	1614355	237	860.766	4.10745	115	1	1612429	1614160	1732	2	FBtr0334842	Mitochondria	Others	Others	Others	Others	ETC	Others	Others	Others	Others	NA	-1.0644	8.5e-104	Mito_EBR
FBgn0021906	RFeSP	44390	Promoter (1-2kb)	-1695	chr2L	1615855	1616081	227	579.652	4.10745	119	1	1612696	1614160	1465	2	FBtr0077915	Mitochondria	Others	Others	Others	Others	ETC	Others	Others	Others	Others	NA	-1.0644	8.5e-104	Mito_EBR
FBgn0265814	lncRNA:CR44603	19835151	Promoter (2-3kb)	2389	chr2L	1620884	1621089	206	299.177	4.10745	100	1	1619412	1623478	4067	2	FBtr0342646	Others	Others	Others	Others	Others	Others	Others	Others	Others	Others	NA	NA	NA	Others
FBgn0265814	lncRNA:CR44603	19835151	Promoter (<=1kb)	953	chr2L	1624848	1625068	221	725.52	4.10745	98	1	1618637	1626021	7385	2	FBtr0342645	Others	Others	Others	Others	Others	Others	Others	Others	Others	Others	NA	NA	NA	Others
FBgn0265814	lncRNA:CR44603	19835151	Promoter (2-3kb)	-2217	chr2L	1628238	1628397	160	225.817	4.10745	95	1	1618637	1626021	7385	2	FBtr0342645	Others	Others	Others	Others	Others	Others	Others	Others	Others	Others	NA	NA	NA	Others
FBgn0265814	lncRNA:CR44603	19835151	Distal Intergenic	-3613	chr2L	1629634	1629837	204	441.037	4.10745	119	1	1618637	1626021	7385	2	FBtr0342645	Others	Others	Others	Others	Others	Others	Others	Others	Others	Others	NA	NA	NA	Others
FBgn0265814	lncRNA:CR44603	19835151	Distal Intergenic	-6670	chr2L	1632691	1632957	267	724.526	4.10745	144	1	1618637	1626021	7385	2	FBtr0342645	Others	Others	Others	Others	Others	Others	Others	Others	Others	Others	NA	NA	NA	Others
FBgn0265814	lncRNA:CR44603	19835151	Distal Intergenic	-8181	chr2L	1634202	1634370	169	296.008	4.10745	80	1	1618637	1626021	7385	2	FBtr0342645	Others	Others	Others	Others	Others	Others	Others	Others	Others	Others	NA	NA	NA	Others
FBgn0267259	lncRNA:CR45695	19835756	Distal Intergenic	8205	chr2L	1638758	1638958	201	516.532	4.10745	55	1	1646932	1647163	232	2	FBtr0346473	Others	Others	Others	Others	Others	Others	Others	Others	Others	Others	NA	NA	NA	Others
FBgn0267259	lncRNA:CR45695	19835756	Distal Intergenic	3611	chr2L	1643433	1643552	120	207.998	3.64078	35	1	1646932	1647163	232	2	FBtr0346473	Others	Others	Others	Others	Others	Others	Others	Others	Others	Others	NA	NA	NA	Others
FBgn0267259	lncRNA:CR45695	19835756	Promoter (<=1kb)	319	chr2L	1646615	1646844	230	473.123	4.10745	84	1	1646932	1647163	232	2	FBtr0346473	Others	Others	Others	Others	Others	Others	Others	Others	Others	Others	NA	NA	NA	Others
FBgn0267259	lncRNA:CR45695	19835756	Promoter (1-2kb)	-1487	chr2L	1648650	1648932	283	1428.35	4.10745	131	1	1646932	1647163	232	2	FBtr0346473	Others	Others	Others	Others	Others	Others	Others	Others	Others	Others	NA	NA	NA	Others
FBgn0086758	chinmo	33343	Promoter (1-2kb)	-1822	chr2L	1649241	1649436	196	185.226	3.68133	76	1	1651258	1698617	47360	1	FBtr0077877	Others	Others	Others	Others	Others	Others	Others	Others	Others	Others	Others	1.45437	3.94e-115	Others
FBgn0086758	chinmo	33343	Promoter (<=1kb)	-957	chr2L	1650108	1650301	194	381.69	4.10745	84	1	1651258	1698617	47360	1	FBtr0077877	Others	Others	Others	Others	Others	Others	Others	Others	Others	Others	Others	1.45437	3.94e-115	Others
FBgn0011570	cpb	33346	Promoter (<=1kb)	0	chr2L	1704728	1705057	330	189.745	3.67237	165	1	1704902	1706777	1876	1	FBtr0077881	Others	Others	Others	Others	Others	Others	Others	Others	Others	Others	NA	-0.570806	2.58e-22	Others
FBgn0031356	CG17660	33347	Promoter (<=1kb)	0	chr2L	1710345	1710559	215	794.407	4.10745	87	1	1707132	1710421	3290	2	FBtr0077912	Others	Others	Others	Others	Others	Others	Others	Others	Others	Others	NA	-0.221677	0.00978362	Others
FBgn0031359	Rim2	33350	Promoter (1-2kb)	1033	chr2L	1723026	1723355	330	236.822	4.10745	165	1	1716244	1724388	8145	2	FBtr0305618	Mitochondria	Others	Others	RNA_metabolism_mito	Others	Others	Others	Others	Others	Others	NA	0.937493	6.44e-19	Mito_EBR
FBgn0031359	Rim2	33350	Promoter (<=1kb)	0	chr2L	1724336	1724537	202	433.179	4.10745	109	1	1716244	1724388	8145	2	FBtr0305618	Mitochondria	Others	Others	RNA_metabolism_mito	Others	Others	Others	Others	Others	Others	NA	0.937493	6.44e-19	Mito_EBR
FBgn0000579	Eno	33351	Promoter (<=1kb)	-27	chr2L	1727744	1727992	249	283.674	4.10745	100	1	1725060	1727717	2658	2	FBtr0302115	Mitochondria	Others	Others	Others	Others	Others	Others	Others	Others	Others	NA	-0.964631	2.54e-144	MitoOthers
FBgn0260648	Rrp40	319033	Promoter (<=1kb)	0	chr2L	1728580	1728909	330	227.189	4.10745	165	1	1728732	1729575	844	1	FBtr0077883	Others	Others	Others	Others	Others	Others	Others	Others	Others	Others	NA	-1.05546	2.3e-11	Others
FBgn0000579	Eno	33351	Promoter (<=1kb)	-45	chr2L	1729681	1729838	158	263.984	4.10745	64	1	1724974	1729636	4663	2	FBtr0077905	Mitochondria	Others	Others	Others	Others	Others	Others	Others	Others	Others	NA	-0.964631	2.54e-144	MitoOthers
FBgn0031361	CG17652	33353	Promoter (<=1kb)	0	chr2L	1732218	1732547	330	384.247	4.10745	165	1	1731033	1732356	1324	2	FBtr0333543	Others	Others	Others	Others	Others	Others	Others	Others	Others	Others	NA	-0.418511	0.0913441	Others
FBgn0264494	CG17646	33354	Promoter (<=1kb)	-132	chr2L	1737069	1737335	267	868.284	4.10745	163	1	1737467	1750612	13146	1	FBtr0077886	Others	Others	Others	Others	Others	Others	Others	Others	Others	Others	NA	-0.249841	0.0885711	Others
FBgn0264494	CG17646	33354	Promoter (<=1kb)	691	chr2L	1738158	1738355	198	345.447	4.10745	67	1	1737467	1750612	13146	1	FBtr0077886	Others	Others	Others	Others	Others	Others	Others	Others	Others	Others	NA	-0.249841	0.0885711	Others
FBgn0051665	wry	33361	Promoter (1-2kb)	1297	chr2L	1837835	1838007	173	319.048	4.10745	90	1	1836538	1858550	22013	1	FBtr0334823	Others	Others	Others	Others	Others	Others	Others	Others	Others	Others	NA	1.78014	5.07e-18	Others
FBgn0031374	Wdr62	33367	Promoter (<=1kb)	0	chr2L	1884394	1884677	284	682.422	4.10745	165	1	1884622	1943461	58840	1	FBtr0113012	Others	Others	Others	Others	Others	Others	Others	Others	Others	Others	NA	1.3549	4.67e-48	Others
FBgn0031374	Wdr62	33367	Promoter (1-2kb)	-1667	chr2L	1909746	1910075	330	150.891	2.61738	165	1	1911742	1943818	32077	1	FBtr0309828	Others	Others	Others	Others	Others	Others	Others	Others	Others	Others	NA	1.3549	4.67e-48	Others
FBgn0031374	Wdr62	33367	Promoter (<=1kb)	-66	chr2L	1911347	1911676	330	225.854	4.10745	165	1	1911742	1943818	32077	1	FBtr0309828	Others	Others	Others	Others	Others	Others	Others	Others	Others	Others	NA	1.3549	4.67e-48	Others
FBgn0031374	Wdr62	33367	Promoter (1-2kb)	1295	chr2L	1913037	1913366	330	162.785	3.02691	165	1	1911742	1944289	32548	1	FBtr0113011	Others	Others	Others	Others	Others	Others	Others	Others	Others	Others	NA	1.3549	4.67e-48	Others
FBgn0031374	Wdr62	33367	Intron (FBtr0113012/FBgn0031374, intron 3 of 18)	4809	chr2L	1916551	1916753	203	455.819	4.10745	90	1	1911742	1944289	32548	1	FBtr0113011	Others	Others	Others	Others	Others	Others	Others	Others	Others	Others	NA	1.3549	4.67e-48	Others
FBgn0031374	Wdr62	33367	Promoter (1-2kb)	-1566	chr2L	1925999	1926187	189	324.658	4.10745	88	1	1927753	1943939	16187	1	FBtr0110882	Others	Others	Others	Others	Others	Others	Others	Others	Others	Others	NA	1.3549	4.67e-48	Others
FBgn0031375	erm	326152	Intron (FBtr0330200/FBgn0031375, intron 1 of 1)	-4987	chr2L	1959540	1959712	173	321.286	4.10745	75	1	1950239	1954553	4315	2	FBtr0330202	Others	Others	Others	Others	Others	Others	Others	Others	Others	Others	Others	0.379018	0.673606	Others
FBgn0051942	tRNA:Arg-TCT-2-1	3772425	Intron (FBtr0330200/FBgn0031375, intron 1 of 1)	-5151	chr2L	1960143	1960275	133	295.63	4.10745	79	1	1965426	1965498	73	1	FBtr0077812	Others	Others	Others	Others	Others	Others	Others	Others	Others	Others	NA	NA	NA	Others
FBgn0267972	Der-1	33369	Promoter (<=1kb)	0	chr2L	1974016	1974170	155	403.606	4.10745	93	1	1974112	1975413	1302	1	FBtr0077813	Others	Others	Others	Others	Others	Others	Others	Others	Others	Others	NA	-0.760231	1.66e-26	Others
FBgn0031377	CG15356	33370	Promoter (<=1kb)	0	chr2L	1980709	1980936	228	487.871	4.10745	82	1	1975463	1980755	5293	2	FBtr0077869	Others	Others	Others	Others	Others	Others	Others	Others	Others	Others	NA	-0.296234	0.338102	Others
FBgn0031379	CG7289	33372	Promoter (<=1kb)	0	chr2L	1981987	1982316	330	202.148	3.65221	165	1	1982217	1984514	2298	1	FBtr0077815	Others	Others	Others	Others	Others	Others	Others	Others	Others	Others	NA	-0.567363	2.18e-12	Others
FBgn0001125	Got2	33373	Promoter (<=1kb)	0	chr2L	1986701	1987030	330	169.04	3.34571	165	1	1984512	1986955	2444	2	FBtr0077868	Mitochondria	Others	Others	Others	Others	Others	Others	Others	Others	Others	NA	-1.45453	3.01e-249	MitoOthers
FBgn0001125	Got2	33373	Promoter (<=1kb)	0	chr2L	1987742	1988071	330	198.546	3.65779	165	1	1984512	1987758	3247	2	FBtr0077867	Mitochondria	Others	Others	Others	Others	Others	Others	Others	Others	Others	NA	-1.45453	3.01e-249	MitoOthers
FBgn0031384	CG4238	33377	Promoter (<=1kb)	0	chr2L	2009638	2009967	330	300.761	4.10745	165	1	2009859	2030536	20678	1	FBtr0301068	Others	Others	Others	Others	Others	Others	Others	Others	Others	Others	NA	1.1619	2.1e-08	Others
FBgn0286732	snoRNA:Or-CD14	39877416	Promoter (<=1kb)	230	chr2L	2014016	2014345	330	150.949	2.61723	165	1	2014449	2014575	127	2	FBtr0474088	Others	Others	Others	Others	Others	Others	Others	Others	Others	Others	NA	NA	NA	Others
FBgn0003557	Su(dx)	33379	Promoter (<=1kb)	0	chr2L	2037507	2037794	288	1363.64	4.10745	145	1	2037714	2043677	5964	1	FBtr0339529	Others	Others	Others	Others	Others	Others	Others	Others	Others	Others	NA	0.440581	1.69e-06	Others
FBgn0264864	lncRNA:CR44055	14462665	Promoter (1-2kb)	1103	chr2L	2084465	2084645	181	345.177	4.10745	92	1	2083362	2084419	1058	1	FBtr0334780	Others	Others	Others	Others	Others	Others	Others	Others	Others	Others	NA	NA	NA	Others
FBgn0264864	lncRNA:CR44055	14462665	Intron (FBtr0334783/FBgn0053516, intron 2 of 7)	6998	chr2L	2090360	2090492	133	203.001	3.65028	44	1	2083362	2084419	1058	1	FBtr0334780	Others	Others	Others	Others	Others	Others	Others	Others	Others	Others	NA	NA	NA	Others
FBgn0004507	GlyP	33386	Promoter (<=1kb)	-397	chr2L	2130149	2130416	268	334.277	4.10745	170	1	2130813	2137043	6231	1	FBtr0100485	Others	Others	Others	Others	Others	Others	Others	Others	Others	Others	NA	-1.35964	7.07e-279	Others
FBgn0004507	GlyP	33386	Promoter (<=1kb)	-80	chr2L	2130482	2130733	252	239.554	4.10745	75	1	2130813	2137043	6231	1	FBtr0100485	Others	Others	Others	Others	Others	Others	Others	Others	Others	Others	NA	-1.35964	7.07e-279	Others
FBgn0031390	tho2	326153	Promoter (<=1kb)	0	chr2L	2145035	2145321	287	1395.19	4.10745	146	1	2137350	2145187	7838	2	FBtr0077853	Others	Others	Others	Others	Others	Others	Others	Others	Others	Others	NA	-0.44312	0.00200792	Others
FBgn0031390	tho2	326153	Promoter (<=1kb)	-287	chr2L	2145474	2145803	330	234.775	4.10745	165	1	2137350	2145187	7838	2	FBtr0334814	Others	Others	Others	Others	Others	Others	Others	Others	Others	Others	NA	-0.44312	0.00200792	Others
FBgn0027509	TBCD	33389	Promoter (<=1kb)	0	chr2L	2147165	2147556	392	772.804	4.10745	198	1	2147518	2151664	4147	1	FBtr0077829	Others	Others	Others	Others	Others	Others	Others	Others	Others	Others	NA	-0.308826	0.0198094	Others
FBgn0000097	aop	33392	Promoter (1-2kb)	-1221	chr2L	2162748	2162897	150	205.33	3.64637	65	1	2156792	2161527	4736	2	FBtr0330659	Others	Others	Others	Others	Others	Others	Others	Others	Others	Others	Others	0.206726	0.0416183	Others
FBgn0000097	aop	33392	Promoter (2-3kb)	-2012	chr2L	2163539	2163795	257	1282.01	4.10745	128	1	2156792	2161527	4736	2	FBtr0330659	Others	Others	Others	Others	Others	Others	Others	Others	Others	Others	Others	0.206726	0.0416183	Others
FBgn0000097	aop	33392	Intron (FBtr0077850/FBgn0000097, intron 1 of 3)	-3303	chr2L	2164830	2165080	251	735.525	4.10745	141	1	2156792	2161527	4736	2	FBtr0330659	Others	Others	Others	Others	Others	Others	Others	Others	Others	Others	Others	0.206726	0.0416183	Others
FBgn0000097	aop	33392	Intron (FBtr0077850/FBgn0000097, intron 1 of 3)	-5760	chr2L	2167287	2167616	330	268.625	4.10745	165	1	2156792	2161527	4736	2	FBtr0330659	Others	Others	Others	Others	Others	Others	Others	Others	Others	Others	Others	0.206726	0.0416183	Others
FBgn0000097	aop	33392	Intron (FBtr0077850/FBgn0000097, intron 1 of 3)	-6704	chr2L	2168231	2168560	330	246.927	4.10745	165	1	2156792	2161527	4736	2	FBtr0330659	Others	Others	Others	Others	Others	Others	Others	Others	Others	Others	Others	0.206726	0.0416183	Others
FBgn0000097	aop	33392	Promoter (<=1kb)	911	chr2L	2177741	2177843	103	200.229	3.65536	20	1	2156484	2178754	22271	2	FBtr0077850	Others	Others	Others	Others	Others	Others	Others	Others	Others	Others	Others	0.206726	0.0416183	Others
FBgn0000097	aop	33392	Promoter (<=1kb)	-742	chr2L	2179496	2179757	262	575.044	4.10745	121	1	2157427	2178754	21328	2	FBtr0330660	Others	Others	Others	Others	Others	Others	Others	Others	Others	Others	Others	0.206726	0.0416183	Others
FBgn0000097	aop	33392	Promoter (1-2kb)	-1340	chr2L	2180094	2180379	286	1015.63	4.10745	130	1	2157427	2178754	21328	2	FBtr0330660	Others	Others	Others	Others	Others	Others	Others	Others	Others	Others	Others	0.206726	0.0416183	Others
FBgn0265017	lncRNA:CR43751	14462666	Promoter (<=1kb)	411	chr2L	2182373	2182565	193	245.558	4.10745	78	1	2181962	2185495	3534	1	FBtr0334810	Others	Others	Others	Others	Others	Others	Others	Others	Others	Others	NA	NA	NA	Others
FBgn0265017	lncRNA:CR43751	14462666	Promoter (<=1kb)	822	chr2L	2182784	2183055	272	1074.46	4.10745	166	1	2181962	2185495	3534	1	FBtr0334810	Others	Others	Others	Others	Others	Others	Others	Others	Others	Others	NA	NA	NA	Others
FBgn0264875	lncRNA:CR44066	14462667	Promoter (<=1kb)	-53	chr2L	2188023	2188136	114	206.167	3.64408	37	1	2186975	2187970	996	2	FBtr0334812	Others	Others	Others	Others	Others	Others	Others	Others	Others	Others	NA	NA	NA	Others
FBgn0266828	lncRNA:CR45290	19835529	Promoter (<=1kb)	78	chr2L	2189085	2189327	243	856.399	4.10745	116	1	2188620	2189405	786	2	FBtr0345556	Others	Others	Others	Others	Others	Others	Others	Others	Others	Others	NA	NA	NA	Others
FBgn0031395	CG10874	33394	Promoter (<=1kb)	0	chr2L	2192332	2192559	228	500.663	4.10745	89	1	2189914	2192386	2473	2	FBtr0077848	Others	Others	Others	Others	Others	Others	Others	Others	Others	Others	NA	0.288253	0.140809	Others
FBgn0085201	CG34172	5740746	Promoter (<=1kb)	-463	chr2L	2193473	2193638	166	428.346	4.10745	74	1	2192525	2193010	486	2	FBtr0308188	Mitochondria	Others	Others	Others	Others	ETC	Others	Others	Others	Others	NA	0.364908	0.988533	Mito_EBR
FBgn0085201	CG34172	5740746	Promoter (1-2kb)	1054	chr2L	2196529	2196858	330	169.949	3.34358	165	1	2192525	2197912	5388	2	FBtr0330663	Mitochondria	Others	Others	Others	Others	ETC	Others	Others	Others	Others	NA	0.364908	0.988533	Mito_EBR
FBgn0085201	CG34172	5740746	Promoter (<=1kb)	717	chr2L	2197062	2197195	134	318.44	4.10745	49	1	2192525	2197912	5388	2	FBtr0330663	Mitochondria	Others	Others	Others	Others	ETC	Others	Others	Others	Others	NA	0.364908	0.988533	Mito_EBR
FBgn0085201	CG34172	5740746	Promoter (1-2kb)	-1297	chr2L	2199209	2199490	282	1460.1	4.10745	149	1	2192525	2197912	5388	2	FBtr0330663	Mitochondria	Others	Others	Others	Others	ETC	Others	Others	Others	Others	NA	0.364908	0.988533	Mito_EBR
FBgn0085201	CG34172	5740746	Distal Intergenic	-3177	chr2L	2201089	2201403	315	701.272	4.10745	161	1	2192525	2197912	5388	2	FBtr0330663	Mitochondria	Others	Others	Others	Others	ETC	Others	Others	Others	Others	NA	0.364908	0.988533	Mito_EBR
FBgn0051668	CG31668	33395	Distal Intergenic	3583	chr2L	2202230	2202583	354	4569.17	4.10745	188	1	2203721	2206166	2446	2	FBtr0307523	Others	Others	Others	Others	Others	Others	Others	Others	Others	Others	NA	-3.30992	2.23e-44	Others
FBgn0010288	Uch	33397	Promoter (<=1kb)	0	chr2L	2213995	2214324	330	237.756	4.10745	165	1	2212738	2214059	1322	2	FBtr0303459	Others	Others	Others	Others	Others	Others	Others	Others	Others	Others	NA	-0.405266	1.93e-06	Others
FBgn0031399	mio	33399	Promoter (<=1kb)	0	chr2L	2217095	2217424	330	259.942	4.10745	165	1	2217290	2220625	3336	1	FBtr0077835	Others	Others	Others	Others	Others	Others	Others	Others	Others	Others	NA	0.389159	0.00092532	Others
FBgn0031401	papi	33401	Promoter (<=1kb)	0	chr2L	2220524	2220853	330	232.388	4.10745	165	1	2220748	2225544	4797	1	FBtr0077836	Others	Others	Others	Others	Others	Others	Others	Others	Others	Others	NA	-0.264278	0.00637606	Others
FBgn0031401	papi	33401	Promoter (<=1kb)	-49	chr2L	2221648	2222040	393	1612.18	4.10745	145	1	2222089	2225544	3456	1	FBtr0077837	Others	Others	Others	Others	Others	Others	Others	Others	Others	Others	NA	-0.264278	0.00637606	Others
FBgn0031403	CG15387	33403	Promoter (<=1kb)	0	chr2L	2226239	2226535	297	744.555	4.10745	124	1	2225545	2226294	750	2	FBtr0113015	Others	Others	Others	Others	Others	Others	Others	Others	Others	Others	NA	-0.134946	0.74173	Others
FBgn0264945	asRNA:CR44114	14462669	Promoter (<=1kb)	0	chr2L	2227435	2227617	183	503.285	4.10745	75	1	2226753	2227604	852	2	FBtr0335164	Others	Others	Others	Others	Others	Others	Others	Others	Others	Others	NA	NA	NA	Others
FBgn0011832	Ser12	33406	Promoter (1-2kb)	1463	chr2L	2249686	2249812	127	174.835	3.47958	84	1	2250431	2251275	845	2	FBtr0077806	Others	Others	Others	Others	Others	Others	Others	Others	Others	Others	NA	NA	NA	Others
FBgn0031413	CG9967	33414	Promoter (<=1kb)	0	chr2L	2357255	2357584	330	153.03	2.73501	165	1	2308761	2357356	48596	2	FBtr0100648	Others	Others	Others	Others	Others	Others	Others	Others	Others	Others	NA	-0.123865	0.632601	Others
FBgn0014010	Rab5	33418	Promoter (<=1kb)	-386	chr2L	2363890	2364096	207	476.925	4.10745	86	1	2359142	2363504	4363	2	FBtr0077797	Others	Others	Others	Others	Others	Others	Others	Others	Others	Others	NA	0.352283	7.7e-08	Others
FBgn0014010	Rab5	33418	Promoter (<=1kb)	0	chr2L	2365227	2365393	167	288.739	4.10745	128	1	2359566	2365273	5708	2	FBtr0077793	Others	Others	Others	Others	Others	Others	Others	Others	Others	Others	NA	0.352283	7.7e-08	Others
FBgn0031418	CG3609	33421	Promoter (<=1kb)	0	chr2L	2374501	2374748	248	822.976	4.10745	127	1	2372455	2374627	2173	2	FBtr0077791	Others	Others	Others	Others	Others	Others	Others	Others	Others	Others	NA	-0.729822	5.62e-30	Others
FBgn0031420	Atxn7	33423	Promoter (<=1kb)	0	chr2L	2375688	2375953	266	1050.93	4.10745	136	1	2375841	2380268	4428	1	FBtr0331438	Others	Others	Others	Others	Others	Others	Others	Others	Others	Others	NA	-0.177169	0.38063	Others
FBgn0031420	Atxn7	33423	Promoter (<=1kb)	0	chr2L	2376254	2376583	330	144.93	2.45783	165	1	2376333	2380506	4174	1	FBtr0331437	Others	Others	Others	Others	Others	Others	Others	Others	Others	Others	NA	-0.177169	0.38063	Others
FBgn0264672	Eogt	33424	Promoter (<=1kb)	0	chr2L	2380844	2381160	317	2222.65	4.10745	150	1	2381097	2383073	1977	1	FBtr0077767	Others	Others	Others	Others	Others	Others	Others	Others	Others	Others	NA	-0.820981	5.62e-13	Others
FBgn0031422	PIG-Wa	33425	Promoter (<=1kb)	0	chr2L	2383049	2383211	163	349.219	4.10745	100	1	2383202	2384747	1546	1	FBtr0077768	Others	Others	Others	Others	Others	Others	Others	Others	Others	Others	NA	-1.08869	9.44e-06	Others
FBgn0031428	CG9886	33431	Promoter (<=1kb)	-70	chr2L	2420563	2420760	198	247.41	4.10745	74	1	2420830	2422910	2081	1	FBtr0077770	Mitochondria	Others	Others	Others	Others	Others	Others	Others	Others	Others	NA	-0.704138	7.72e-08	MitoOthers
FBgn0266217	lncRNA:CR44912	19835130	Promoter (1-2kb)	1124	chr2L	2426542	2426757	216	639.436	4.10745	110	1	2427050	2427881	832	2	FBtr0343862	Others	Others	Others	Others	Others	Others	Others	Others	Others	Others	NA	NA	NA	Others
FBgn0000490	dpp	33432	Intron (FBtr0077771/FBgn0000490, intron 1 of 2)	5150	chr2L	2433522	2433766	245	1064.89	4.10745	127	1	2428372	2459823	31452	1	FBtr0077771	Others	Others	Others	Others	Others	Others	Others	Others	Others	Others	NA	0.532046	0.000695954	Others
FBgn0000490	dpp	33432	Intron (FBtr0077771/FBgn0000490, intron 1 of 2)	10484	chr2L	2438856	2439185	330	167.538	3.23958	165	1	2428372	2459823	31452	1	FBtr0077771	Others	Others	Others	Others	Others	Others	Others	Others	Others	Others	NA	0.532046	0.000695954	Others
FBgn0264978	Slh	33434	Distal Intergenic	5542	chr2L	2486967	2487129	163	327.234	4.10745	70	1	2488197	2492671	4475	2	FBtr0335169	Others	Others	Others	Others	Others	Others	Others	Others	Others	Others	NA	-0.841048	8.64e-24	Others
FBgn0011818	oaf	33435	Promoter (<=1kb)	0	chr2L	2492632	2492969	338	1062.55	4.10745	153	1	2492955	2497357	4403	1	FBtr0077779	Others	Others	Others	Others	Others	Others	Others	Others	Others	Others	NA	1.12217	3.25e-22	Others
FBgn0011818	oaf	33435	Promoter (1-2kb)	1382	chr2L	2494337	2494507	171	140.395	2.34439	72	1	2492955	2498846	5892	1	FBtr0077780	Others	Others	Others	Others	Others	Others	Others	Others	Others	Others	NA	1.12217	3.25e-22	Others
FBgn0011818	oaf	33435	Promoter (1-2kb)	1791	chr2L	2494746	2494891	146	192.747	3.66748	108	1	2492955	2498846	5892	1	FBtr0077780	Others	Others	Others	Others	Others	Others	Others	Others	Others	Others	NA	1.12217	3.25e-22	Others
FBgn0264943	lncRNA:CR44112	14462675	Distal Intergenic	5180	chr2L	2528227	2528389	163	327.542	4.10745	96	1	2532999	2533569	571	2	FBtr0335168	Others	Others	Others	Others	Others	Others	Others	Others	Others	Others	NA	NA	NA	Others
FBgn0026778	Rad1	33440	Promoter (<=1kb)	0	chr2L	2574994	2575168	175	394.137	4.10745	93	1	2573436	2575052	1617	2	FBtr0077747	Others	Others	Others	Others	Others	Others	Others	Others	Others	Others	NA	NA	NA	Others
FBgn0031436	ND-B17.2	33443	Promoter (<=1kb)	0	chr2L	2580085	2580257	173	364.637	4.10745	108	1	2579257	2580172	916	2	FBtr0335174	Mitochondria	Others	Others	Others	Others	ETC	Others	Others	Others	Others	NA	-1.46783	2.65e-85	Mito_EBR
FBgn0026479	Drp1	33445	Promoter (<=1kb)	0	chr2L	2585391	2585641	251	931.109	4.10745	107	1	2581281	2585430	4150	2	FBtr0335173	Mitochondria	Others	Others	Others	Others	Others	Others	Others	Others	Others	NA	-1.11061	1.47e-45	MitoOthers
FBgn0031449	CG31689	326154	Distal Intergenic	-5050	chr2L	2720474	2720624	151	228.471	4.10745	67	1	2725674	2739830	14157	1	FBtr0334161	Others	Others	Others	Others	Others	Others	Others	Others	Others	Others	NA	-0.221429	0.000399828	Others
FBgn0031449	CG31689	326154	Distal Intergenic	-4054	chr2L	2721433	2721620	188	324.241	4.10745	125	1	2725674	2739830	14157	1	FBtr0334161	Others	Others	Others	Others	Others	Others	Others	Others	Others	Others	NA	-0.221429	0.000399828	Others
FBgn0031449	CG31689	326154	Promoter (2-3kb)	-2315	chr2L	2723256	2723359	104	220.914	4.10745	73	1	2725674	2739830	14157	1	FBtr0334161	Others	Others	Others	Others	Others	Others	Others	Others	Others	Others	NA	-0.221429	0.000399828	Others
FBgn0031449	CG31689	326154	Promoter (<=1kb)	0	chr2L	2729881	2730210	330	153.064	2.7348	165	1	2730104	2739830	9727	1	FBtr0077705	Others	Others	Others	Others	Others	Others	Others	Others	Others	Others	NA	-0.221429	0.000399828	Others
FBgn0031449	CG31689	326154	Promoter (<=1kb)	583	chr2L	2731419	2731748	330	204.137	3.64833	165	1	2730836	2739830	8995	1	FBtr0077708	Others	Others	Others	Others	Others	Others	Others	Others	Others	Others	NA	-0.221429	0.000399828	Others
FBgn0031449	CG31689	326154	Promoter (1-2kb)	-1198	chr2L	2734287	2734616	330	181.966	3.68786	165	1	2735814	2739830	4017	1	FBtr0334158	Others	Others	Others	Others	Others	Others	Others	Others	Others	Others	NA	-0.221429	0.000399828	Others
FBgn0031450	Hrs	33458	Promoter (<=1kb)	0	chr2L	2739881	2740115	235	581.399	4.10745	114	1	2739986	2743377	3392	1	FBtr0089751	Others	Others	Others	Others	Others	Others	Others	Others	Others	Others	NA	0.719089	6.13e-10	Others
FBgn0250906	Pgk	33461	Promoter (<=1kb)	-33	chr2L	2748520	2748841	322	754.803	4.10745	160	1	2746880	2748487	1608	2	FBtr0077739	Others	Others	Others	Others	Others	Others	Others	Others	Others	Others	NA	-1.01759	3.42e-109	Others
FBgn0250906	Pgk	33461	Promoter (<=1kb)	0	chr2L	2749246	2749327	82	159.502	2.93207	26	1	2746880	2749313	2434	2	FBtr0334162	Others	Others	Others	Others	Others	Others	Others	Others	Others	Others	NA	-1.01759	3.42e-109	Others
FBgn0250906	Pgk	33461	Promoter (<=1kb)	-209	chr2L	2749522	2749851	330	218.103	4.10745	165	1	2746880	2749313	2434	2	FBtr0334162	Others	Others	Others	Others	Others	Others	Others	Others	Others	Others	NA	-1.01759	3.42e-109	Others
FBgn0250906	Pgk	33461	Promoter (<=1kb)	-161	chr2L	2750308	2750571	264	543.809	4.10745	135	1	2746880	2750147	3268	2	FBtr0330716	Others	Others	Others	Others	Others	Others	Others	Others	Others	Others	NA	-1.01759	3.42e-109	Others
FBgn0250906	Pgk	33461	Promoter (<=1kb)	0	chr2L	2750734	2751063	330	209.27	3.63779	165	1	2746880	2750989	4110	2	FBtr0330717	Others	Others	Others	Others	Others	Others	Others	Others	Others	Others	NA	-1.01759	3.42e-109	Others
FBgn0031453	Bacc	33462	Promoter (<=1kb)	-364	chr2L	2751865	2752081	217	413.904	4.10745	139	1	2752445	2757920	5476	1	FBtr0335125	Others	Others	Others	Others	Others	Others	Others	Others	Others	Others	NA	-0.094848	0.132156	Others
FBgn0250906	Pgk	33461	Promoter (<=1kb)	0	chr2L	2752870	2753082	213	381.667	4.10745	126	1	2746880	2753068	6189	2	FBtr0330718	Others	Others	Others	Others	Others	Others	Others	Others	Others	Others	NA	-1.01759	3.42e-109	Others
FBgn0031453	Bacc	33462	Promoter (1-2kb)	1270	chr2L	2754503	2754896	394	427.088	4.10745	159	1	2753233	2756663	3431	1	FBtr0077714	Others	Others	Others	Others	Others	Others	Others	Others	Others	Others	NA	-0.094848	0.132156	Others
FBgn0031454	HemK2	3771966	Promoter (<=1kb)	0	chr2L	2759664	2759945	282	659.076	4.10745	117	1	2758427	2759677	1251	2	FBtr0100383	Others	Others	Others	Others	Others	Others	Others	Others	Others	Others	NA	NA	NA	Others
FBgn0031458	aph-1	33467	Promoter (<=1kb)	0	chr2L	2765925	2766244	320	515.577	4.10745	222	1	2766233	2767154	922	1	FBtr0077716	Others	Others	Others	Others	Others	Others	Others	Others	Others	Others	NA	-0.276562	0.131865	Others
FBgn0026324	Taf10b	33468	Promoter (<=1kb)	0	chr2L	2767713	2768042	330	389.842	4.10745	165	1	2767286	2767845	560	2	FBtr0077735	Others	Others	Others	Others	Others	Others	Others	Others	Others	Others	NA	-0.784725	1.67e-06	Others
FBgn0019830	colt	33470	Promoter (<=1kb)	0	chr2L	2769978	2770187	210	437.206	4.10745	117	1	2768590	2770069	1480	2	FBtr0077731	Mitochondria	Others	Others	Others	Others	Others	Others	Others	Others	Others	NA	-1.09812	2.73e-62	MitoOthers
FBgn0283531	Duox	33477	Promoter (<=1kb)	-79	chr2L	2830327	2830478	152	196.585	3.66172	62	1	2815970	2830248	14279	2	FBtr0335133	Others	Others	Others	Others	Others	Others	Others	Others	Others	Others	NA	0.497593	0.000181789	Others
FBgn0031473	CG3104	33486	Promoter (<=1kb)	38	chr2L	2855411	2855740	330	284.117	4.10745	165	1	2848989	2855778	6790	2	FBtr0077686	Others	Others	Others	Others	Others	Others	Others	Others	Others	Others	NA	0.706831	2.1e-07	Others
FBgn0015521	RpS21	33487	Promoter (<=1kb)	0	chr2L	2855948	2856203	256	542.064	4.10745	135	1	2856070	2856705	636	1	FBtr0273293	Others	Others	Others	Others	Others	Others	Others	Others	Others	Others	NA	-0.991919	5.06e-16	Others
FBgn0031474	CG2991	33488	Promoter (<=1kb)	0	chr2L	2857003	2857222	220	539.059	4.10745	126	1	2857164	2868548	11385	1	FBtr0077625	Others	Others	Others	Others	Others	Others	Others	Others	Others	Others	NA	0.596679	8.35e-10	Others
FBgn0031474	CG2991	33488	Promoter (2-3kb)	2102	chr2L	2864639	2864968	330	294.023	4.10745	165	1	2862537	2868548	6012	1	FBtr0077627	Others	Others	Others	Others	Others	Others	Others	Others	Others	Others	NA	0.596679	8.35e-10	Others
FBgn0051694	CG31694	33489	Promoter (1-2kb)	1009	chr2L	2873151	2873480	330	160.197	2.97872	165	1	2868627	2874489	5863	2	FBtr0077685	Others	Others	Others	Others	Others	Others	Others	Others	Others	Others	NA	0.260487	5.52e-05	Others
FBgn0051694	CG31694	33489	Promoter (<=1kb)	-8	chr2L	2874497	2874608	112	264.137	4.10745	65	1	2868627	2874489	5863	2	FBtr0077685	Others	Others	Others	Others	Others	Others	Others	Others	Others	Others	NA	0.260487	5.52e-05	Others
FBgn0051950	Sbat	319043	Promoter (<=1kb)	0	chr2L	2878240	2878487	248	453.524	4.10745	133	1	2878344	2879001	658	1	FBtr0332457	Others	Others	Others	Others	Others	Others	Others	Others	Others	Others	NA	-1.904	3.84e-10	Others
FBgn0028970	betaggt-II	47757	Promoter (<=1kb)	0	chr2L	2878911	2879240	330	579.311	4.10745	165	1	2879112	2880708	1597	1	FBtr0077631	Others	Others	Others	Others	Others	Others	Others	Others	Others	Others	NA	0.131492	0.288132	Others
FBgn0024947	NTPase	33495	Promoter (<=1kb)	0	chr2L	2883062	2883227	166	309.989	4.10745	78	1	2880704	2883126	2423	2	FBtr0077682	Others	Others	Others	Others	Others	Others	Others	Others	Others	Others	NA	1.4763	7.6e-249	Others
FBgn0024947	NTPase	33495	Promoter (<=1kb)	0	chr2L	2885172	2885436	265	921.905	4.10745	107	1	2880704	2885214	4511	2	FBtr0332459	Others	Others	Others	Others	Others	Others	Others	Others	Others	Others	NA	1.4763	7.6e-249	Others
FBgn0024947	NTPase	33495	Promoter (<=1kb)	0	chr2L	2885820	2885913	94	353.035	4.10745	90	1	2880704	2885850	5147	2	FBtr0077680	Others	Others	Others	Others	Others	Others	Others	Others	Others	Others	NA	1.4763	7.6e-249	Others
FBgn0041111	lilli	33496	Intron (FBtr0077632/FBgn0041111, intron 2 of 12)	6862	chr2L	2897033	2897265	233	503.453	4.10745	122	1	2890171	2953077	62907	1	FBtr0290041	Others	Others	Others	Others	Others	Others	Others	Others	Others	Others	Others	0.697265	1.27e-13	Others
FBgn0041111	lilli	33496	Intron (FBtr0077632/FBgn0041111, intron 2 of 12)	15949	chr2L	2906120	2906449	330	154.431	2.8247	165	1	2890171	2953077	62907	1	FBtr0290041	Others	Others	Others	Others	Others	Others	Others	Others	Others	Others	Others	0.697265	1.27e-13	Others
FBgn0041111	lilli	33496	Intron (FBtr0077632/FBgn0041111, intron 3 of 12)	-4972	chr2L	2941462	2941591	130	209.506	3.63739	54	1	2946563	2952511	5949	1	FBtr0290038	Others	Others	Others	Others	Others	Others	Others	Others	Others	Others	Others	0.697265	1.27e-13	Others
FBgn0010263	Rbp9	33498	Promoter (<=1kb)	-134	chr2L	2954547	2954628	82	270.001	4.10745	77	1	2954762	2964851	10090	1	FBtr0290237	Others	Others	Others	Others	Others	Others	Others	Others	Others	Others	NA	0.367628	0.000203168	Others
FBgn0024920	Ts	33499	Promoter (2-3kb)	2464	chr2L	2967021	2967174	154	326.04	4.10745	118	1	2968293	2969638	1346	2	FBtr0077679	Mitochondria	Others	Others	Others	Others	Others	Others	Others	Others	Others	NA	-2.80619	4.17e-44	MitoOthers
FBgn0024920	Ts	33499	Promoter (<=1kb)	-37	chr2L	2969675	2969756	82	336.73	4.10745	32	1	2968503	2969638	1136	2	FBtr0343784	Mitochondria	Others	Others	Others	Others	Others	Others	Others	Others	Others	NA	-2.80619	4.17e-44	MitoOthers
FBgn0004584	Rrp1	33500	Promoter (<=1kb)	0	chr2L	2972485	2972568	84	231.491	4.10745	84	1	2969773	2972508	2736	2	FBtr0077678	Others	Others	Others	Others	Others	Others	Others	Others	Others	Others	NA	-1.23374	3.96e-18	Others
FBgn0260639	gammaTub23C	33501	Promoter (<=1kb)	0	chr2L	2972728	2972932	205	149.507	2.5256	113	1	2972891	2974858	1968	1	FBtr0077641	Others	Others	Others	Others	Others	Others	Others	Others	Others	Others	NA	-0.18836	0.20091	Others
FBgn0031484	CG3165	33503	Promoter (<=1kb)	0	chr2L	2976918	2977189	272	511.225	4.10745	142	1	2977122	2978398	1277	1	FBtr0343781	Others	Others	Others	Others	Others	Others	Others	Others	Others	Others	NA	0.0195368	0.934723	Others
FBgn0031485	CG9643	33504	Promoter (<=1kb)	0	chr2L	2978850	2979464	615	25972.1	4.10745	456	1	2978411	2979288	878	2	FBtr0343783	Others	Others	Others	Others	Others	Others	Others	Others	Others	Others	NA	-2.89672	5.81e-36	Others
FBgn0031485	CG9643	33504	Promoter (<=1kb)	-262	chr2L	2979550	2979836	287	424.983	4.10745	270	1	2978526	2979288	763	2	FBtr0077675	Others	Others	Others	Others	Others	Others	Others	Others	Others	Others	NA	-2.89672	5.81e-36	Others
FBgn0025109	Bem46	44441	Promoter (<=1kb)	0	chr2L	2987910	2988146	237	511.85	4.10745	130	1	2988116	2990075	1960	1	FBtr0077643	Others	Others	Others	Others	Others	Others	Others	Others	Others	Others	NA	-0.0961736	0.310382	Others
FBgn0002989	okr	33507	Promoter (<=1kb)	0	chr2L	2992659	2992988	330	693.336	4.10745	154	1	2989594	2992759	3166	2	FBtr0077673	Others	Others	Others	Others	Others	Others	Others	Others	Others	Others	NA	-0.198131	0.518572	Others
FBgn0031488	Ccdc85	33509	Promoter (<=1kb)	0	chr2L	2999108	2999294	187	568.861	4.10745	123	1	2999286	3016069	16784	1	FBtr0077646	Others	Others	Others	Others	Others	Others	Others	Others	Others	Others	NA	0.0629319	0.676621	Others
FBgn0031488	Ccdc85	33509	Intron (FBtr0077646/FBgn0031488, intron 1 of 3)	4211	chr2L	3003497	3003709	213	573.581	4.10745	126	1	2999286	3016069	16784	1	FBtr0077646	Others	Others	Others	Others	Others	Others	Others	Others	Others	Others	NA	0.0629319	0.676621	Others
FBgn0031488	Ccdc85	33509	Intron (FBtr0077646/FBgn0031488, intron 1 of 3)	5417	chr2L	3004703	3005032	330	206.069	3.64434	165	1	2999286	3016069	16784	1	FBtr0077646	Others	Others	Others	Others	Others	Others	Others	Others	Others	Others	NA	0.0629319	0.676621	Others
FBgn0031493	Sf3b2	33514	Promoter (<=1kb)	0	chr2L	3029112	3029318	207	470.081	4.10745	108	1	3026252	3029168	2917	2	FBtr0335484	Others	Others	Others	Others	Others	Others	Others	Others	Others	Others	NA	-0.142129	0.299208	Others
FBgn0031495	GABPI	33516	Promoter (<=1kb)	0	chr2L	3030442	3030546	105	214.685	4.10745	75	1	3030539	3032300	1762	1	FBtr0077651	Others	Others	Others	Others	Others	Others	Others	Others	Others	Others	NA	-0.463155	1.74e-07	Others
FBgn0031497	SerRS	33518	Promoter (<=1kb)	0	chr2L	3037274	3037538	265	656.232	4.10745	146	1	3035493	3037403	1911	2	FBtr0077667	Mitochondria	Others	Others	RNA_metabolism_mito	Others	Others	Others	Others	Others	Others	NA	-0.227445	3.72e-05	Mito_EBR
FBgn0031500	CG17221	33521	Promoter (<=1kb)	0	chr2L	3039802	3040051	250	511.706	4.10745	124	1	3039976	3041626	1651	1	FBtr0077654	Mitochondria	Others	Others	Others	Others	Others	Others	Others	Others	Others	NA	-0.888489	6.98e-14	MitoOthers
FBgn0031501	CG17261	33522	Promoter (<=1kb)	-81	chr2L	3042141	3042470	330	311.577	4.10745	165	1	3042551	3043593	1043	1	FBtr0335385	Others	Others	Others	Others	Others	Others	Others	Others	Others	Others	NA	-1.80811	0.0010104	Others
FBgn0015600	toc	33526	Promoter (<=1kb)	0	chr2L	3086462	3086791	330	172.613	3.48473	165	1	3068345	3086491	18147	2	FBtr0329906	Others	Others	Others	Others	Others	Others	Others	Others	Others	Others	NA	0.708375	6.64e-11	Others
FBgn0015600	toc	33526	Promoter (1-2kb)	-1745	chr2L	3092656	3092737	82	155.329	2.82261	64	1	3068345	3090911	22567	2	FBtr0077665	Others	Others	Others	Others	Others	Others	Others	Others	Others	Others	NA	0.708375	6.64e-11	Others
FBgn0015600	toc	33526	Intron (FBtr0110903/FBgn0015600, intron 1 of 8)	-6242	chr2L	3100937	3101095	159	234.727	4.10745	84	1	3069396	3094695	25300	2	FBtr0077664	Others	Others	Others	Others	Others	Others	Others	Others	Others	Others	NA	0.708375	6.64e-11	Others
FBgn0015600	toc	33526	Promoter (1-2kb)	-1829	chr2L	3114165	3114494	330	156.063	2.8572	165	1	3069396	3112336	42941	2	FBtr0335388	Others	Others	Others	Others	Others	Others	Others	Others	Others	Others	NA	0.708375	6.64e-11	Others
FBgn0015600	toc	33526	Promoter (<=1kb)	-50	chr2L	3144836	3144994	159	519.124	4.10745	79	1	3068345	3144786	76442	2	FBtr0077662	Others	Others	Others	Others	Others	Others	Others	Others	Others	Others	NA	0.708375	6.64e-11	Others
FBgn0031505	ND-B14.5B	33528	Promoter (<=1kb)	0	chr2L	3145615	3145944	330	203.064	3.65021	165	1	3144953	3145848	896	2	FBtr0329905	Mitochondria	Others	Others	Others	Others	ETC	Others	Others	Others	Others	NA	-1.60792	4.02e-48	Mito_EBR
FBgn0011648	Mad	33529	5' UTR	3151	chr2L	3149273	3149602	330	219.796	4.10745	165	1	3146056	3152753	6698	2	FBtr0332372	Others	Others	Others	Others	Others	Others	Others	Others	Others	Others	Others	0.311996	0.000558844	Others
FBgn0011648	Mad	33529	Promoter (<=1kb)	-485	chr2L	3153238	3153577	340	2951.94	4.10745	168	1	3146056	3152753	6698	2	FBtr0332372	Others	Others	Others	Others	Others	Others	Others	Others	Others	Others	Others	0.311996	0.000558844	Others
FBgn0011648	Mad	33529	Promoter (<=1kb)	29	chr2L	3159285	3159614	330	163.297	3.02561	165	1	3146452	3159643	13192	2	FBtr0077616	Others	Others	Others	Others	Others	Others	Others	Others	Others	Others	Others	0.311996	0.000558844	Others
FBgn0264744	CG44002	33535	Promoter (<=1kb)	0	chr2L	3170978	3171307	330	232.797	4.10745	165	1	3169820	3171092	1273	2	FBtr0334134	Others	Others	Others	Others	Others	Others	Others	Others	Others	Others	Others	1.1318	0.0059676	Others
FBgn0031516	CG9663	33541	Promoter (<=1kb)	546	chr2L	3301937	3302584	648	438.287	4.10745	478	1	3294926	3303130	8205	2	FBtr0077604	Others	Others	Others	Others	Others	Others	Others	Others	Others	Others	NA	0.00133479	0.989497	Others
FBgn0031516	CG9663	33541	Promoter (<=1kb)	546	chr2L	3301937	3302584	648	5312.9	4.10745	264	1	3294926	3303130	8205	2	FBtr0077604	Others	Others	Others	Others	Others	Others	Others	Others	Others	Others	NA	0.00133479	0.989497	Others
FBgn0031516	CG9663	33541	Promoter (<=1kb)	0	chr2L	3302878	3303207	330	196.196	3.66266	165	1	3294926	3303130	8205	2	FBtr0077604	Others	Others	Others	Others	Others	Others	Others	Others	Others	Others	NA	0.00133479	0.989497	Others
FBgn0031518	CG3277	33543	Promoter (<=1kb)	-352	chr2L	3303576	3303748	173	354.325	4.10745	94	1	3304100	3317418	13319	1	FBtr0114460	Others	Others	Others	Others	Others	Others	Others	Others	Others	Others	NA	0.197897	0.429957	Others
FBgn0031519	Fign	33544	Promoter (<=1kb)	0	chr2L	3319861	3320047	187	492.528	4.10745	88	1	3316794	3319872	3079	2	FBtr0331372	Others	Others	Others	Others	Others	Others	Others	Others	Others	Others	NA	-0.859826	0.118376	Others
FBgn0031523	CG15408	33548	Intron (FBtr0089979/FBgn0020445, intron 2 of 8)	6062	chr2L	3338876	3339140	265	1168.96	4.10745	137	1	3332814	3334790	1977	1	FBtr0077587	Others	Others	Others	Others	Others	Others	Others	Others	Others	Others	NA	0.988044	1.32e-10	Others
FBgn0020445	E23	43895	Intron (FBtr0089979/FBgn0020445, intron 2 of 8)	8808	chr2L	3345692	3346021	330	211.589	3.63384	165	1	3334875	3354829	19955	2	FBtr0089979	Others	Others	Others	Others	Others	Others	Others	Others	Others	Others	NA	-1.20618	1.04e-16	Others
FBgn0020445	E23	43895	Intron (FBtr0089979/FBgn0020445, intron 2 of 8)	6391	chr2L	3348189	3348438	250	937.798	4.10745	131	1	3334875	3354829	19955	2	FBtr0089979	Others	Others	Others	Others	Others	Others	Others	Others	Others	Others	NA	-1.20618	1.04e-16	Others
FBgn0020445	E23	43895	Promoter (<=1kb)	-95	chr2L	3354924	3355163	240	855.748	4.10745	105	1	3334875	3354829	19955	2	FBtr0339549	Others	Others	Others	Others	Others	Others	Others	Others	Others	Others	NA	-1.20618	1.04e-16	Others
FBgn0085423	GramD1B	33552	Promoter (<=1kb)	575	chr2L	3372468	3372797	330	235.803	4.10745	165	1	3358640	3373372	14733	2	FBtr0112638	Others	Others	Others	Others	Others	Others	Others	Others	Others	Others	NA	1.08193	3.49e-21	Others
FBgn0085423	GramD1B	33552	Promoter (<=1kb)	0	chr2L	3373362	3373568	207	610.7	4.10745	91	1	3358640	3373372	14733	2	FBtr0112638	Others	Others	Others	Others	Others	Others	Others	Others	Others	Others	NA	1.08193	3.49e-21	Others
FBgn0016698	Ptpa	33555	Promoter (<=1kb)	0	chr2L	3376720	3377010	291	905.891	4.10745	170	1	3377002	3378590	1589	1	FBtr0077589	Others	Others	Others	Others	Others	Others	Others	Others	Others	Others	NA	0.134528	0.342992	Others
FBgn0031530	Pgant2	33556	Distal Intergenic	-8462	chr2L	3435181	3435362	182	393.324	4.10745	98	1	3404460	3426719	22260	2	FBtr0303992	Others	Others	Others	Others	Others	Others	Others	Others	Others	Others	NA	0.273445	0.0572143	Others
FBgn0031533	CG2772	33559	Distal Intergenic	-8670	chr2L	3437082	3437322	241	898.646	4.10745	122	1	3445992	3447589	1598	1	FBtr0077516	Others	Others	Others	Others	Others	Others	Others	Others	Others	Others	NA	0.114367	0.464206	Others
FBgn0031533	CG2772	33559	Distal Intergenic	-5377	chr2L	3440368	3440615	248	969.679	4.10745	123	1	3445992	3447589	1598	1	FBtr0077516	Others	Others	Others	Others	Others	Others	Others	Others	Others	Others	NA	0.114367	0.464206	Others
FBgn0031533	CG2772	33559	Promoter (<=1kb)	-923	chr2L	3444878	3445069	192	502.682	4.10745	86	1	3445992	3447589	1598	1	FBtr0077516	Others	Others	Others	Others	Others	Others	Others	Others	Others	Others	NA	0.114367	0.464206	Others
FBgn0031540	Pif1	33567	Promoter (<=1kb)	0	chr2L	3469913	3470151	239	774.311	4.10745	134	1	3467342	3470004	2663	2	FBtr0343239	Others	Others	Others	Others	Others	Others	Others	Others	Others	Others	NA	-1.4134	1.16e-09	Others
FBgn0051956	Pgant4	261610	Promoter (<=1kb)	-105	chr2L	3472386	3472498	113	323.538	4.10745	53	1	3472603	3475338	2736	1	FBtr0333248	Others	Others	Others	Others	Others	Others	Others	Others	Others	Others	NA	0.12375	0.23522	Others
FBgn0264549	lncRNA:CR43928	14462683	Promoter (<=1kb)	-39	chr2L	3475975	3476304	330	314.281	4.10745	165	1	3476343	3477648	1306	1	FBtr0345782	Others	Others	Others	Others	Others	Others	Others	Others	Others	Others	NA	NA	NA	Others
FBgn0264549	lncRNA:CR43928	14462683	Promoter (<=1kb)	373	chr2L	3477224	3477553	330	180.686	3.69023	165	1	3476851	3477648	798	1	FBtr0333249	Others	Others	Others	Others	Others	Others	Others	Others	Others	Others	NA	NA	NA	Others
FBgn0261560	Thor	33569	Promoter (<=1kb)	0	chr2L	3478338	3478667	330	255.221	4.10745	165	1	3478434	3479612	1179	1	FBtr0077524	Others	Others	Others	Others	Others	Others	Others	Others	Others	Others	NA	1.09971	9.2e-156	Others
FBgn0261560	Thor	33569	Promoter (1-2kb)	1956	chr2L	3480478	3480807	330	143.666	2.41951	165	1	3478522	3479612	1091	1	FBtr0345289	Others	Others	Others	Others	Others	Others	Others	Others	Others	Others	NA	1.09971	9.2e-156	Others
FBgn0031549	Spindly	33578	Promoter (<=1kb)	0	chr2L	3530280	3530609	330	232.231	4.10745	165	1	3527387	3530317	2931	2	FBtr0301590	Others	Others	Others	Others	Others	Others	Others	Others	Others	Others	NA	-0.357889	0.430577	Others
FBgn0031550	IFT57	33579	Promoter (2-3kb)	2409	chr2L	3533198	3533424	227	501.976	4.10745	115	1	3530789	3532678	1890	1	FBtr0077529	Others	Others	Others	Others	Others	Others	Others	Others	Others	Others	NA	1.44234	0.0842851	Others
FBgn0265367	lncRNA:CR44308	19836131	Distal Intergenic	-3103	chr2L	3534570	3534741	172	300.32	4.10745	101	1	3537844	3538333	490	1	FBtr0339568	Others	Others	Others	Others	Others	Others	Others	Others	Others	Others	NA	NA	NA	Others
FBgn0265367	lncRNA:CR44308	19836131	Promoter (2-3kb)	-2125	chr2L	3535390	3535719	330	145.866	2.47042	165	1	3537844	3538333	490	1	FBtr0339568	Others	Others	Others	Others	Others	Others	Others	Others	Others	Others	NA	NA	NA	Others
FBgn0024244	drm	49638	Distal Intergenic	9204	chr2L	3548937	3549266	330	163.285	3.02566	165	1	3539733	3548081	8349	1	FBtr0344768	Others	Others	Others	Others	Others	Others	Others	Others	Others	Others	Others	-0.156352	0.0449529	Others
FBgn0024244	drm	49638	Distal Intergenic	10931	chr2L	3550664	3550993	330	145.516	2.45644	165	1	3539733	3548081	8349	1	FBtr0344768	Others	Others	Others	Others	Others	Others	Others	Others	Others	Others	Others	-0.156352	0.0449529	Others
FBgn0265368	lncRNA:CR44309	19835843	Distal Intergenic	-9007	chr2L	3552897	3553031	135	246.128	4.10745	80	1	3562038	3563118	1081	1	FBtr0339569	Others	Others	Others	Others	Others	Others	Others	Others	Others	Others	NA	NA	NA	Others
FBgn0265368	lncRNA:CR44309	19835843	Distal Intergenic	-6669	chr2L	3555206	3555369	164	281.948	4.10745	77	1	3562038	3563118	1081	1	FBtr0339569	Others	Others	Others	Others	Others	Others	Others	Others	Others	Others	NA	NA	NA	Others
FBgn0265368	lncRNA:CR44309	19835843	Distal Intergenic	-6133	chr2L	3555787	3555905	119	161.545	3.02995	59	1	3562038	3563118	1081	1	FBtr0339569	Others	Others	Others	Others	Others	Others	Others	Others	Others	Others	NA	NA	NA	Others
FBgn0265368	lncRNA:CR44309	19835843	Promoter (2-3kb)	-2092	chr2L	3559804	3559946	143	157.609	2.93649	68	1	3562038	3563118	1081	1	FBtr0339569	Others	Others	Others	Others	Others	Others	Others	Others	Others	Others	NA	NA	NA	Others
FBgn0265960	lncRNA:CR44747	19836215	Distal Intergenic	-3101	chr2L	3566641	3566855	215	430.014	4.10745	115	1	3563308	3563540	233	2	FBtr0342953	Others	Others	Others	Others	Others	Others	Others	Others	Others	Others	NA	NA	NA	Others
FBgn0264370	lncRNA:CR43822	14462684	Distal Intergenic	-5120	chr2L	3569901	3570230	330	203.999	3.64872	165	1	3575350	3575806	457	1	FBtr0332221	Others	Others	Others	Others	Others	Others	Others	Others	Others	Others	NA	NA	NA	Others
FBgn0264370	lncRNA:CR43822	14462684	Promoter (2-3kb)	-2398	chr2L	3572623	3572952	330	159.595	2.93165	165	1	3575350	3575806	457	1	FBtr0332221	Others	Others	Others	Others	Others	Others	Others	Others	Others	Others	NA	NA	NA	Others
FBgn0264370	lncRNA:CR43822	14462684	Promoter (1-2kb)	-1661	chr2L	3573426	3573689	264	604.533	4.10745	143	1	3575350	3575806	457	1	FBtr0332221	Others	Others	Others	Others	Others	Others	Others	Others	Others	Others	NA	NA	NA	Others
FBgn0264370	lncRNA:CR43822	14462684	Promoter (1-2kb)	-1076	chr2L	3573982	3574274	293	1342.58	4.10745	156	1	3575350	3575806	457	1	FBtr0332221	Others	Others	Others	Others	Others	Others	Others	Others	Others	Others	NA	NA	NA	Others
FBgn0264363	CG43815	14462685	Promoter (<=1kb)	0	chr2L	3576198	3576346	149	149.717	2.52525	43	1	3576210	3576623	414	1	FBtr0332222	Others	Others	Others	Others	Others	Others	Others	Others	Others	Others	NA	NA	NA	Others
FBgn0264363	CG43815	14462685	Promoter (<=1kb)	407	chr2L	3576617	3576771	155	237.36	4.10745	76	1	3576210	3576623	414	1	FBtr0332222	Others	Others	Others	Others	Others	Others	Others	Others	Others	Others	NA	NA	NA	Others
FBgn0264363	CG43815	14462685	Promoter (1-2kb)	1310	chr2L	3577520	3577849	330	256.483	4.10745	165	1	3576210	3576623	414	1	FBtr0332222	Others	Others	Others	Others	Others	Others	Others	Others	Others	Others	NA	NA	NA	Others
FBgn0284410	lncRNA:TS2	36786375	Promoter (<=1kb)	0	chr2L	3587395	3587595	201	395.326	4.10745	103	1	3587068	3587469	402	2	FBtr0452189	Others	Others	Others	Others	Others	Others	Others	Others	Others	Others	NA	NA	NA	Others
FBgn0284410	lncRNA:TS2	36786375	Promoter (<=1kb)	-936	chr2L	3588405	3588674	270	834.001	4.10745	138	1	3587068	3587469	402	2	FBtr0452189	Others	Others	Others	Others	Others	Others	Others	Others	Others	Others	NA	NA	NA	Others
FBgn0264371	lncRNA:CR43823	14462686	Distal Intergenic	-3780	chr2L	3594081	3594309	229	769.521	4.10745	115	1	3588485	3590301	1817	2	FBtr0332223	Others	Others	Others	Others	Others	Others	Others	Others	Others	Others	NA	NA	NA	Others
FBgn0264371	lncRNA:CR43823	14462686	Distal Intergenic	-6898	chr2L	3597199	3597528	330	145.024	2.45753	165	1	3588485	3590301	1817	2	FBtr0332223	Others	Others	Others	Others	Others	Others	Others	Others	Others	Others	NA	NA	NA	Others
FBgn0002985	odd	33583	Distal Intergenic	7973	chr2L	3598564	3598783	220	630.289	4.10745	123	1	3604224	3606756	2533	2	FBtr0077557	Others	Others	Others	Others	Others	Others	Others	Others	Others	Others	Others	1.56602	2.95e-30	Others
FBgn0002985	odd	33583	Distal Intergenic	5627	chr2L	3600943	3601129	187	348.71	4.10745	101	1	3604224	3606756	2533	2	FBtr0077557	Others	Others	Others	Others	Others	Others	Others	Others	Others	Others	Others	1.56602	2.95e-30	Others
FBgn0015663	Ugt36A1	44058	Promoter (<=1kb)	-836	chr2L	3617932	3618261	330	141.175	2.35316	165	1	3619097	3621573	2477	1	FBtr0339571	Others	Others	Others	Others	Others	Others	Others	Others	Others	Others	NA	-0.713497	8.26e-07	Others
FBgn0031554	CG15418	33585	Intron (FBtr0089306/FBgn0000721, intron 2 of 6)	-3215	chr2L	3624919	3625056	138	243.568	4.10745	55	1	3621110	3621704	595	2	FBtr0446100	Others	Others	Others	Others	Others	Others	Others	Others	Others	Others	NA	-0.858697	0.684368	Others
FBgn0000721	for	44817	Intron (FBtr0089306/FBgn0000721, intron 1 of 6)	3030	chr2L	3628815	3629124	310	1105.97	4.10745	154	1	3622074	3632154	10081	2	FBtr0089306	Others	Others	Others	Others	Others	Others	Others	Others	Others	Others	NA	-0.125755	0.145014	Others
FBgn0000721	for	44817	Promoter (<=1kb)	-194	chr2L	3632348	3632666	319	1333.63	4.10745	181	1	3622617	3632154	9538	2	FBtr0301399	Others	Others	Others	Others	Others	Others	Others	Others	Others	Others	NA	-0.125755	0.145014	Others
FBgn0000721	for	44817	Promoter (1-2kb)	-1561	chr2L	3647699	3647828	130	255.207	4.10745	67	1	3622074	3646138	24065	2	FBtr0473364	Others	Others	Others	Others	Others	Others	Others	Others	Others	Others	NA	-0.125755	0.145014	Others
FBgn0000721	for	44817	Promoter (<=1kb)	977	chr2L	3655670	3655976	307	3026.2	4.10745	152	1	3622074	3656953	34880	2	FBtr0089304	Others	Others	Others	Others	Others	Others	Others	Others	Others	Others	NA	-0.125755	0.145014	Others
FBgn0000721	for	44817	Promoter (<=1kb)	-308	chr2L	3657261	3657590	330	294.82	4.10745	165	1	3622074	3656953	34880	2	FBtr0473363	Others	Others	Others	Others	Others	Others	Others	Others	Others	Others	NA	-0.125755	0.145014	Others
FBgn0261054	Sfp24Bc	8673990	Intron (FBtr0302391/FBgn0085369, intron 2 of 7)	-5284	chr2L	3675865	3676079	215	355.481	4.10745	103	1	3670131	3670581	451	2	FBtr0301934	Others	Others	Others	Others	Others	Others	Others	Others	Others	Others	NA	NA	NA	Others
FBgn0261054	Sfp24Bc	8673990	Intron (FBtr0302391/FBgn0085369, intron 4 of 7)	-10481	chr2L	3681062	3681391	330	141.492	2.36347	165	1	3670131	3670581	451	2	FBtr0301934	Others	Others	Others	Others	Others	Others	Others	Others	Others	Others	NA	NA	NA	Others
FBgn0031564	CG2816	33595	Promoter (<=1kb)	-118	chr2L	3703383	3703541	159	311.967	4.10745	50	1	3703659	3704253	595	1	FBtr0300299	Others	Others	Others	Others	Others	Others	Others	Others	Others	Others	NA	1.34439	2.12e-06	Others
FBgn0015376	cutlet	44637	Promoter (<=1kb)	0	chr2L	3711596	3711925	330	211.823	3.63323	165	1	3707230	3711748	4519	2	FBtr0077541	Others	Others	Others	Others	Others	Others	Others	Others	Others	Others	NA	-2.058	6.72e-26	Others
FBgn0051955	CG31955	319045	Promoter (<=1kb)	-35	chr2L	3713140	3713303	164	312.741	4.10745	44	1	3712154	3713105	952	2	FBtr0345639	Others	Others	Others	Others	Others	Others	Others	Others	Others	Others	NA	3.53117	7.48e-28	Others
FBgn0031568	CG10019	33600	Exon (FBtr0321291/FBgn0031568, exon 6 of 13)	3314	chr2L	3748708	3749037	330	214.964	4.10745	165	1	3745394	3754617	9224	1	FBtr0273188	Others	Others	Others	Others	Others	Others	Others	Others	Others	Others	NA	1.28459	0.000443577	Others
FBgn0004893	bowl	33602	Promoter (<=1kb)	-58	chr2L	3771325	3771642	318	1654.11	4.10745	173	1	3771700	3784121	12422	1	FBtr0077490	Others	Others	Others	Others	Others	Others	Others	Others	Others	Others	Others	0.255988	0.00135424	Others
FBgn0004893	bowl	33602	Promoter (2-3kb)	-2626	chr2L	3776096	3776312	217	263.354	4.10745	101	1	3778938	3784121	5184	1	FBtr0077493	Others	Others	Others	Others	Others	Others	Others	Others	Others	Others	Others	0.255988	0.00135424	Others
FBgn0004893	bowl	33602	Promoter (2-3kb)	-2007	chr2L	3776774	3776931	158	141.613	2.36312	82	1	3778938	3784121	5184	1	FBtr0077493	Others	Others	Others	Others	Others	Others	Others	Others	Others	Others	Others	0.255988	0.00135424	Others
FBgn0051958	CR31958	33603	Promoter (<=1kb)	527	chr2L	3786265	3786541	277	863.998	4.10745	136	1	3785738	3786343	606	1	FBtr0445666	Others	Others	Others	Others	Others	Others	Others	Others	Others	Others	NA	NA	NA	Others
FBgn0021800	Reph	47399	Promoter (<=1kb)	316	chr2L	3803861	3804190	330	186.21	3.67928	165	1	3803545	3810671	7127	1	FBtr0077497	Others	Others	Others	Others	Others	Others	Others	Others	Others	Others	NA	0.804585	5.75e-08	Others
FBgn0021800	Reph	47399	Promoter (<=1kb)	-759	chr2L	3804591	3804923	333	3348.8	4.10745	170	1	3805682	3808895	3214	1	FBtr0077498	Others	Others	Others	Others	Others	Others	Others	Others	Others	Others	NA	0.804585	5.75e-08	Others
FBgn0031573	CG3407	33606	Promoter (<=1kb)	0	chr2L	3813345	3813587	243	782.359	4.10745	122	1	3810801	3813410	2610	2	FBtr0077515	Others	Others	Others	Others	Others	Others	Others	Others	Others	Others	Others	0.290237	0.318995	Others
FBgn0264886	lncRNA:CR44077	14462690	Promoter (1-2kb)	1301	chr2L	3819025	3819199	175	374.972	4.10745	95	1	3817724	3818534	811	1	FBtr0334831	Others	Others	Others	Others	Others	Others	Others	Others	Others	Others	NA	NA	NA	Others
FBgn0004567	slp2	33608	Distal Intergenic	-4167	chr2L	3832342	3832673	332	3495.77	4.10745	176	1	3836840	3839185	2346	1	FBtr0077500	Others	Others	Others	Others	Others	Others	Others	Others	Others	Others	Others	0.00620511	0.998593	Others
FBgn0004567	slp2	33608	Distal Intergenic	4224	chr2L	3841064	3841265	202	508.538	4.10745	111	1	3836840	3839185	2346	1	FBtr0077500	Others	Others	Others	Others	Others	Others	Others	Others	Others	Others	Others	0.00620511	0.998593	Others
FBgn0266318	lncRNA:CR44983	19836026	Promoter (1-2kb)	1324	chr2L	3844280	3844392	113	199.667	3.65613	21	1	3845130	3845716	587	2	FBtr0344048	Others	Others	Others	Others	Others	Others	Others	Others	Others	Others	NA	NA	NA	Others
FBgn0266318	lncRNA:CR44983	19836026	Promoter (<=1kb)	466	chr2L	3844921	3845250	330	162.408	3.02757	165	1	3845130	3845716	587	2	FBtr0344048	Others	Others	Others	Others	Others	Others	Others	Others	Others	Others	NA	NA	NA	Others
FBgn0267007	lncRNA:CR45451	19835085	Promoter (<=1kb)	-362	chr2L	3851411	3851589	179	365.957	4.10745	88	1	3851951	3852604	654	1	FBtr0345955	Others	Others	Others	Others	Others	Others	Others	Others	Others	Others	NA	NA	NA	Others
FBgn0267007	lncRNA:CR45451	19835085	Promoter (<=1kb)	270	chr2L	3852221	3852452	232	728.577	4.10745	111	1	3851951	3852604	654	1	FBtr0345955	Others	Others	Others	Others	Others	Others	Others	Others	Others	Others	NA	NA	NA	Others
FBgn0267005	lncRNA:CR45449	19835482	Promoter (1-2kb)	1229	chr2L	3853639	3853765	127	190.929	3.66972	72	1	3854288	3854994	707	2	FBtr0345957	Others	Others	Others	Others	Others	Others	Others	Others	Others	Others	NA	NA	NA	Others
FBgn0267005	lncRNA:CR45449	19835482	Promoter (<=1kb)	-636	chr2L	3855630	3855712	83	146.553	2.46882	67	1	3854288	3854994	707	2	FBtr0345957	Others	Others	Others	Others	Others	Others	Others	Others	Others	Others	NA	NA	NA	Others
FBgn0267006	lncRNA:CR45450	19836088	Promoter (1-2kb)	-1068	chr2L	3858240	3858383	144	243.492	4.10745	68	1	3856478	3857172	695	2	FBtr0345956	Others	Others	Others	Others	Others	Others	Others	Others	Others	Others	NA	NA	NA	Others
FBgn0264887	lncRNA:CR44078	14462691	Promoter (<=1kb)	411	chr2L	3861468	3861686	219	455.338	4.10745	109	1	3861405	3862097	693	2	FBtr0334834	Others	Others	Others	Others	Others	Others	Others	Others	Others	Others	NA	NA	NA	Others
FBgn0031574	TTLL4B	33609	Promoter (<=1kb)	0	chr2L	3862485	3862678	194	359.127	4.10745	113	1	3862668	3867504	4837	1	FBtr0077502	Others	Others	Others	Others	Others	Others	Others	Others	Others	Others	NA	-2.89939	2.02e-06	Others
FBgn0031575	Cep97	33610	Promoter (<=1kb)	0	chr2L	3867645	3867726	82	336.826	4.10745	54	1	3867697	3871425	3729	1	FBtr0077504	Others	Others	Others	Others	Others	Others	Others	Others	Others	Others	NA	0.60848	0.00331761	Others
FBgn0051957	CG31957	319046	Promoter (<=1kb)	0	chr2L	3872381	3872604	224	812.177	4.10745	109	1	3871271	3872458	1188	2	FBtr0334833	Others	Others	Others	Others	Others	Others	Others	Others	Others	Others	NA	-1.32864	2.35e-05	Others
FBgn0000256	capu	33611	Promoter (2-3kb)	-2220	chr2L	3882287	3882451	165	268.655	4.10745	88	1	3872646	3880067	7422	2	FBtr0290079	Others	Others	Others	Others	Others	Others	Others	Others	Others	Others	NA	0.301598	0.135679	Others
FBgn0000256	capu	33611	Promoter (<=1kb)	-369	chr2L	3889193	3889341	149	276.15	4.10745	127	1	3872660	3888824	16165	2	FBtr0077513	Others	Others	Others	Others	Others	Others	Others	Others	Others	Others	NA	0.301598	0.135679	Others
FBgn0000256	capu	33611	Promoter (<=1kb)	-799	chr2L	3896907	3896990	84	144.906	2.45788	43	1	3872660	3896108	23449	2	FBtr0077511	Others	Others	Others	Others	Others	Others	Others	Others	Others	Others	NA	0.301598	0.135679	Others
FBgn0051773	CG31773	326159	Intron (FBtr0308125/FBgn0051774, intron 3 of 8)	-27862	chr2L	3942150	3942479	330	141.539	2.36327	165	1	3911796	3914288	2493	2	FBtr0077509	Mitochondria	Others	Others	Others	Others	Others	Others	Others	Others	Others	NA	0.530925	0.824907	MitoOthers
FBgn0000547	ed	33619	Promoter (<=1kb)	-622	chr2L	4030506	4030755	250	1276.71	4.10745	126	1	4031377	4114436	83060	1	FBtr0077465	Others	Others	Others	Others	Others	Others	Others	Others	Others	Others	NA	0.634343	5.77e-10	Others
FBgn0000547	ed	33619	Promoter (<=1kb)	0	chr2L	4031252	4031581	330	158.558	2.9341	165	1	4031377	4114436	83060	1	FBtr0077465	Others	Others	Others	Others	Others	Others	Others	Others	Others	Others	NA	0.634343	5.77e-10	Others
FBgn0000547	ed	33619	Intron (FBtr0077465/FBgn0000547, intron 2 of 8)	11721	chr2L	4043098	4043427	330	149.218	2.50941	165	1	4031377	4115749	84373	1	FBtr0334265	Others	Others	Others	Others	Others	Others	Others	Others	Others	Others	NA	0.634343	5.77e-10	Others
FBgn0000547	ed	33619	Intron (FBtr0077465/FBgn0000547, intron 2 of 8)	14174	chr2L	4045551	4045688	138	158.617	2.93389	62	1	4031377	4115749	84373	1	FBtr0334265	Others	Others	Others	Others	Others	Others	Others	Others	Others	Others	NA	0.634343	5.77e-10	Others
FBgn0000547	ed	33619	Intron (FBtr0077465/FBgn0000547, intron 2 of 8)	22147	chr2L	4053524	4053742	219	262.379	4.10745	109	1	4031377	4115749	84373	1	FBtr0334265	Others	Others	Others	Others	Others	Others	Others	Others	Others	Others	NA	0.634343	5.77e-10	Others
FBgn0266319	asRNA:CR44984	19835330	Intron (FBtr0077465/FBgn0000547, intron 2 of 8)	18912	chr2L	4056882	4057040	159	332.992	4.10745	69	1	4074279	4075952	1674	2	FBtr0344049	Others	Others	Others	Others	Others	Others	Others	Others	Others	Others	NA	NA	NA	Others
FBgn0266319	asRNA:CR44984	19835330	Intron (FBtr0077465/FBgn0000547, intron 2 of 8)	12240	chr2L	4063571	4063712	142	258.015	4.10745	79	1	4074279	4075952	1674	2	FBtr0344049	Others	Others	Others	Others	Others	Others	Others	Others	Others	Others	NA	NA	NA	Others
FBgn0266319	asRNA:CR44984	19835330	Promoter (<=1kb)	-13	chr2L	4075965	4076072	108	203.688	3.64917	26	1	4074279	4075952	1674	2	FBtr0344049	Others	Others	Others	Others	Others	Others	Others	Others	Others	Others	NA	NA	NA	Others
FBgn0086032	snoRNA:Me28S-C437	5740382	Intron (FBtr0077465/FBgn0000547, intron 5 of 8)	-4741	chr2L	4080885	4081149	265	1116.7	4.10745	146	1	4085890	4086005	116	1	FBtr0114308	Others	Others	Others	Others	Others	Others	Others	Others	Others	Others	NA	NA	NA	Others
FBgn0086032	snoRNA:Me28S-C437	5740382	Intron (FBtr0077465/FBgn0000547, intron 5 of 8)	7926	chr2L	4093816	4094066	251	964.938	4.10745	125	1	4085890	4086005	116	1	FBtr0114308	Others	Others	Others	Others	Others	Others	Others	Others	Others	Others	NA	NA	NA	Others
FBgn0086032	snoRNA:Me28S-C437	5740382	Intron (FBtr0077465/FBgn0000547, intron 5 of 8)	10673	chr2L	4096563	4096892	330	162.653	3.02713	165	1	4085890	4086005	116	1	FBtr0114308	Others	Others	Others	Others	Others	Others	Others	Others	Others	Others	NA	NA	NA	Others
FBgn0020376	Sr-CIII	44382	Promoter (1-2kb)	-1034	chr2L	4119068	4119309	242	775.339	4.10745	124	1	4120343	4121627	1285	1	FBtr0077466	Others	Others	Others	Others	Others	Others	Others	Others	Others	Others	NA	0.0198434	0.990746	Others
FBgn0014033	Sr-CI	33621	Distal Intergenic	7286	chr2L	4128988	4129121	134	167.084	3.24041	85	1	4121702	4124153	2452	1	FBtr0346582	Others	Others	Others	Others	Others	Others	Others	Others	Others	Others	NA	0.148092	0.170493	Others
FBgn0014033	Sr-CI	33621	Distal Intergenic	11506	chr2L	4133208	4133324	117	180.13	3.69129	56	1	4121702	4124153	2452	1	FBtr0346582	Others	Others	Others	Others	Others	Others	Others	Others	Others	Others	NA	0.148092	0.170493	Others
FBgn0031585	CG2955	33622	Promoter (2-3kb)	-2693	chr2L	4146454	4146586	133	194.344	3.66549	57	1	4149279	4151203	1925	1	FBtr0077468	Others	Others	Others	Others	Others	Others	Others	Others	Others	Others	NA	0.372745	0.857048	Others
FBgn0031585	CG2955	33622	Promoter (<=1kb)	-583	chr2L	4148367	4148696	330	166.774	3.24102	165	1	4149279	4151203	1925	1	FBtr0077468	Others	Others	Others	Others	Others	Others	Others	Others	Others	Others	NA	0.372745	0.857048	Others
FBgn0051961	TBCC	319048	Promoter (<=1kb)	0	chr2L	4187744	4187870	127	320.162	4.10745	93	1	4186250	4187793	1544	2	FBtr0077484	Others	Others	Others	Others	Others	Others	Others	Others	Others	Others	NA	0.462599	0.000239517	Others
FBgn0001075	ft	33627	Promoter (1-2kb)	-1207	chr2L	4223003	4223103	101	168.594	3.34666	21	1	4198404	4221796	23393	2	FBtr0077478	Others	Others	Others	Others	Others	Others	Others	Others	Others	Others	NA	0.309494	0.00884515	Others
FBgn0001075	ft	33627	Promoter (2-3kb)	-2299	chr2L	4224095	4224424	330	176.323	3.47703	165	1	4198404	4221796	23393	2	FBtr0077478	Others	Others	Others	Others	Others	Others	Others	Others	Others	Others	NA	0.309494	0.00884515	Others
FBgn0031590	CG3702	33628	Promoter (<=1kb)	0	chr2L	4226865	4227194	330	324.15	4.10745	165	1	4224650	4226980	2331	2	FBtr0334790	Others	Others	Others	Others	Others	Others	Others	Others	Others	Others	NA	-0.910914	1.25e-49	Others
FBgn0003941	RpL40	33629	Promoter (<=1kb)	0	chr2L	4227539	4227868	330	187.371	3.67697	165	1	4227699	4228547	849	1	FBtr0077470	Others	Others	Others	Others	Others	Others	Others	Others	Others	Others	NA	-0.407202	2.93e-15	Others
FBgn0266832	lncRNA:CR45294	19835379	Promoter (2-3kb)	2873	chr2L	4252883	4253212	330	252.444	4.10745	165	1	4255720	4256085	366	2	FBtr0345562	Others	Others	Others	Others	Others	Others	Others	Others	Others	Others	NA	NA	NA	Others
FBgn0010473	tutl	46015	Promoter (<=1kb)	-234	chr2L	4282651	4282914	264	712.427	4.10745	112	1	4283148	4305695	22548	1	FBtr0089268	Others	Others	Others	Others	Others	Others	Others	Others	Others	Others	NA	1.22642	4.58e-27	Others
FBgn0010473	tutl	46015	Promoter (2-3kb)	2950	chr2L	4287200	4287347	148	267.719	4.10745	75	1	4284250	4321233	36984	1	FBtr0301864	Others	Others	Others	Others	Others	Others	Others	Others	Others	Others	NA	1.22642	4.58e-27	Others
FBgn0020762	Atet	33636	Promoter (<=1kb)	-690	chr2L	4332965	4333223	259	586.77	4.10745	105	1	4333913	4345411	11499	1	FBtr0077426	Others	Others	Others	Others	Others	Others	Others	Others	Others	Others	NA	0.868001	1.69e-24	Others
FBgn0020762	Atet	33636	Promoter (<=1kb)	-184	chr2L	4333443	4333729	287	521.764	4.10745	140	1	4333913	4345411	11499	1	FBtr0077426	Others	Others	Others	Others	Others	Others	Others	Others	Others	Others	NA	0.868001	1.69e-24	Others
FBgn0265908	lncRNA:CR44697	19836217	Promoter (1-2kb)	-1436	chr2L	4345736	4346065	330	170.683	3.34206	165	1	4347501	4347954	454	1	FBtr0342832	Others	Others	Others	Others	Others	Others	Others	Others	Others	Others	NA	NA	NA	Others
FBgn0265911	lncRNA:CR44700	19836091	Promoter (<=1kb)	-17	chr2L	4350777	4350982	206	358.445	4.10745	102	1	4350999	4351449	451	1	FBtr0342835	Others	Others	Others	Others	Others	Others	Others	Others	Others	Others	NA	NA	NA	Others
FBgn0266903	lncRNA:CR45363	19834826	Promoter (<=1kb)	-689	chr2L	4364941	4365270	330	273.892	4.10745	165	1	4361689	4364252	2564	2	FBtr0345770	Others	Others	Others	Others	Others	Others	Others	Others	Others	Others	NA	NA	NA	Others
FBgn0266903	lncRNA:CR45363	19834826	Promoter (<=1kb)	-187	chr2L	4371490	4371623	134	141.615	2.36307	94	1	4361689	4371303	9615	2	FBtr0445833	Others	Others	Others	Others	Others	Others	Others	Others	Others	Others	NA	NA	NA	Others
FBgn0031597	CG17612	33639	Promoter (<=1kb)	0	chr2L	4382590	4382919	330	171.534	3.34042	165	1	4380722	4382661	1940	2	FBtr0077464	Others	Others	Others	Others	Others	Others	Others	Others	Others	Others	Others	0.00887775	0.988503	Others
FBgn0031598	Vps53	33640	Promoter (<=1kb)	0	chr2L	4385907	4386236	330	170.093	3.34324	165	1	4382925	4386062	3138	2	FBtr0077462	Others	Others	Others	Others	Others	Others	Others	Others	Others	Others	NA	-0.241242	0.167515	Others
FBgn0261976	Psf2	33641	Promoter (<=1kb)	0	chr2L	4387019	4387163	145	407.488	4.10745	54	1	4386182	4387070	889	2	FBtr0331449	Others	Others	Others	Others	Others	Others	Others	Others	Others	Others	NA	-0.884219	0.000267994	Others
FBgn0051963	tRNA:Trp-CCA-2-1	3771975	Promoter (<=1kb)	653	chr2L	4418066	4418395	330	202.381	3.65131	165	1	4418977	4419048	72	2	FBtr0077458	Others	Others	Others	Others	Others	Others	Others	Others	Others	Others	NA	NA	NA	Others
FBgn0031602	CG15431	33646	Promoter (<=1kb)	194	chr2L	4441003	4441088	86	207.305	3.64204	76	1	4403992	4441282	37291	2	FBtr0077459	Others	Others	Others	Others	Others	Others	Others	Others	Others	Others	NA	1.06884	6.62e-06	Others
FBgn0031603	CG15432	33647	Promoter (<=1kb)	0	chr2L	4442189	4442643	455	6389.35	4.10745	190	1	4442320	4442985	666	1	FBtr0331435	Others	Others	Others	Others	Others	Others	Others	Others	Others	Others	NA	-0.0388513	0.916904	Others
FBgn0027609	morgue	33648	Promoter (<=1kb)	0	chr2L	4444570	4444913	344	1262.1	4.10745	168	1	4442870	4444680	1811	2	FBtr0077457	Others	Others	Others	Others	Others	Others	Others	Others	Others	Others	NA	0.0602444	0.783449	Others
FBgn0025684	MFS18	33650	Promoter (<=1kb)	-186	chr2L	4448821	4449067	247	979.965	4.10745	60	1	4446670	4448635	1966	2	FBtr0077456	Others	Others	Others	Others	Others	Others	Others	Others	Others	Others	NA	-1.12503	1.91e-28	Others
FBgn0031606	CG15439	33651	Promoter (<=1kb)	0	chr2L	4452903	4453232	330	225.917	4.10745	165	1	4449295	4453038	3744	2	FBtr0077455	Others	Others	Others	Others	Others	Others	Others	Others	Others	Others	NA	-0.038926	0.863091	Others
FBgn0031607	Secp43	33652	Promoter (<=1kb)	0	chr2L	4454379	4454647	269	1296.39	4.10745	134	1	4453169	4454453	1285	2	FBtr0077454	Others	Others	Others	Others	Others	Others	Others	Others	Others	Others	NA	-0.115925	0.406947	Others
FBgn0285948	RpL27A	33654	Promoter (<=1kb)	0	chr2L	4458214	4458526	313	828.548	4.10745	134	1	4457186	4458317	1132	2	FBtr0077452	Others	Others	Others	Others	Others	Others	Others	Others	Others	Others	NA	-0.365462	5.45e-15	Others
FBgn0285948	RpL27A	33654	Promoter (<=1kb)	-393	chr2L	4458757	4458943	187	403.151	4.10745	113	1	4457186	4458364	1179	2	FBtr0335136	Others	Others	Others	Others	Others	Others	Others	Others	Others	Others	NA	-0.365462	5.45e-15	Others
FBgn0031608	CG15435	33655	Promoter (<=1kb)	0	chr2L	4459648	4459977	330	243.534	4.10745	165	1	4459729	4461746	2018	1	FBtr0345632	Others	Others	Others	Others	Others	Others	Others	Others	Others	Others	Others	-0.631954	0.00268855	Others
FBgn0031610	CG15436	33657	Promoter (<=1kb)	0	chr2L	4463488	4463689	202	420.33	4.10745	83	1	4463611	4465075	1465	1	FBtr0077442	Others	Others	Others	Others	Others	Others	Others	Others	Others	Others	Others	0.334281	0.298375	Others
FBgn0031611	FIG4	33658	Promoter (<=1kb)	0	chr2L	4464936	4465265	330	150.779	2.61764	165	1	4465174	4468022	2849	1	FBtr0077443	Others	Others	Others	Others	Others	Others	Others	Others	Others	Others	NA	-0.000243606	0.97803	Others
FBgn0263869	lncRNA:CR43716	14462698	Promoter (<=1kb)	-435	chr2L	4583403	4583619	217	602.697	4.10745	104	1	4582250	4582968	719	2	FBtr0329834	Others	Others	Others	Others	Others	Others	Others	Others	Others	Others	NA	NA	NA	Others
FBgn0031623	Taf12L	33672	Intron (FBtr0112561/FBgn0085380, intron 2 of 5)	-5305	chr2L	4706790	4706873	84	142.577	2.3962	19	1	4700835	4701485	651	2	FBtr0077420	Others	Others	Others	Others	Others	Others	Others	Others	Others	Others	NA	-5.4258	0.0559744	Others
FBgn0266835	lncRNA:CR45297	19835041	Promoter (1-2kb)	1557	chr2L	4810059	4810388	330	280.446	4.10745	165	1	4811711	4811945	235	2	FBtr0345563	Others	Others	Others	Others	Others	Others	Others	Others	Others	Others	NA	NA	NA	Others
FBgn0266835	lncRNA:CR45297	19835041	Promoter (<=1kb)	0	chr2L	4811809	4812138	330	144.499	2.45848	165	1	4811711	4811945	235	2	FBtr0345563	Others	Others	Others	Others	Others	Others	Others	Others	Others	Others	NA	NA	NA	Others
FBgn0031630	CG15629	33679	Promoter (<=1kb)	934	chr2L	4813943	4814272	330	151.845	2.68426	165	1	4813009	4815891	2883	1	FBtr0077383	Others	Others	Others	Others	Others	Others	Others	Others	Others	Others	NA	0.0307271	0.774785	Others
FBgn0031631	CG3225	33680	Promoter (<=1kb)	0	chr2L	4818165	4818356	192	524.655	4.10745	107	1	4815613	4818245	2633	2	FBtr0077416	Others	Others	Others	Others	Others	Others	Others	Others	Others	Others	NA	0.46798	0.277971	Others
FBgn0031632	CG15628	33681	Promoter (<=1kb)	-551	chr2L	4821028	4821223	196	419.314	4.10745	93	1	4821774	4828557	6784	1	FBtr0077384	Others	Others	Others	Others	Others	Others	Others	Others	Others	Others	NA	1.40497	1.71e-10	Others
FBgn0031635	tank	33684	Promoter (<=1kb)	0	chr2L	4837694	4838161	468	5308.84	4.10745	173	1	4835335	4837999	2665	2	FBtr0077412	Others	Others	Others	Others	Others	Others	Others	Others	Others	Others	NA	0.803863	1.49e-27	Others
FBgn0031640	Mon1	33689	Promoter (<=1kb)	0	chr2L	4850508	4850708	201	460.245	4.10745	121	1	4850641	4852640	2000	1	FBtr0077387	Others	Others	Others	Others	Others	Others	Others	Others	Others	Others	NA	-0.30366	0.0120793	Others
FBgn0051660	smog	33690	Intron (FBtr0077388/FBgn0051660, intron 2 of 13)	3340	chr2L	4856204	4856454	251	771.409	4.10745	118	1	4852864	4876792	23929	1	FBtr0336831	Others	Others	Others	Others	Others	Others	Others	Others	Others	Others	NA	NA	NA	Others
FBgn0031644	CG15625	33694	Promoter (2-3kb)	-2342	chr2L	4887476	4887653	178	179.389	3.69288	98	1	4889995	4891277	1283	1	FBtr0077390	Others	Others	Others	Others	Others	Others	Others	Others	Others	Others	NA	0.281429	0.7001	Others
FBgn0031644	CG15625	33694	Promoter (1-2kb)	-1804	chr2L	4887964	4888191	228	770.173	4.10745	146	1	4889995	4891277	1283	1	FBtr0077390	Others	Others	Others	Others	Others	Others	Others	Others	Others	Others	NA	0.281429	0.7001	Others
FBgn0031645	CG3036	33695	Promoter (<=1kb)	0	chr2L	4892026	4892355	330	222.579	4.10745	165	1	4892112	4903458	11347	1	FBtr0336832	Others	Others	Others	Others	Others	Others	Others	Others	Others	Others	NA	0.0290943	0.680074	Others
FBgn0031646	snsl	33696	Promoter (<=1kb)	0	chr2L	4906517	4906846	330	225.317	4.10745	165	1	4903865	4906762	2898	2	FBtr0077402	Others	Others	Others	Others	Others	Others	Others	Others	Others	Others	NA	2.20132	1.66e-102	Others
FBgn0031646	snsl	33696	Promoter (1-2kb)	-1295	chr2L	4908057	4908240	184	189.036	3.6741	88	1	4904070	4906762	2693	2	FBtr0113021	Others	Others	Others	Others	Others	Others	Others	Others	Others	Others	NA	2.20132	1.66e-102	Others
FBgn0015000	betaggt-I	33704	Promoter (<=1kb)	0	chr2L	4945391	4945628	238	742.862	4.10745	140	1	4945579	4948324	2746	1	FBtr0078991	Others	Others	Others	Others	Others	Others	Others	Others	Others	Others	NA	0.126124	0.110194	Others
FBgn0010607	l(2)05714	46066	Promoter (<=1kb)	0	chr2L	4971458	4971540	83	278.562	4.10745	28	1	4970135	4971485	1351	2	FBtr0079050	Others	Others	Others	Others	Others	Others	Others	Others	Others	Others	NA	-0.0262812	0.876093	Others
FBgn0010607	l(2)05714	46066	Promoter (<=1kb)	0	chr2L	4973769	4974098	330	266.033	4.10745	165	1	4970135	4973921	3787	2	FBtr0331229	Others	Others	Others	Others	Others	Others	Others	Others	Others	Others	NA	-0.0262812	0.876093	Others
FBgn0031661	Gmd	33716	Promoter (<=1kb)	0	chr2L	4976988	4977305	318	492.673	4.10745	179	1	4975300	4977023	1724	2	FBtr0079049	Others	Others	Others	Others	Others	Others	Others	Others	Others	Others	NA	-0.191461	0.234079	Others
FBgn0031664	CG8892	33719	Promoter (<=1kb)	0	chr2L	4981310	4981701	392	755.995	4.10745	221	1	4979513	4981587	2075	2	FBtr0331228	Others	Others	Others	Others	Others	Others	Others	Others	Others	Others	NA	-0.317158	0.217786	Others
FBgn0053113	Rtnl1	33721	Promoter (<=1kb)	-49	chr2L	4997430	4997820	391	4210.58	4.10745	225	1	4993641	4997381	3741	2	FBtr0079042	Others	Others	Others	Others	Others	Others	Others	Others	Others	Others	NA	-1.0634	1.8e-153	Others
FBgn0053113	Rtnl1	33721	Promoter (<=1kb)	-222	chr2L	4999724	4999931	208	545.161	4.10745	103	1	4992808	4999502	6695	2	FBtr0079044	Others	Others	Others	Others	Others	Others	Others	Others	Others	Others	NA	-1.0634	1.8e-153	Others
FBgn0053113	Rtnl1	33721	Promoter (<=1kb)	-101	chr2L	5000471	5000620	150	264.32	4.10745	79	1	4994084	5000370	6287	2	FBtr0079041	Others	Others	Others	Others	Others	Others	Others	Others	Others	Others	NA	-1.0634	1.8e-153	Others
FBgn0053113	Rtnl1	33721	Promoter (<=1kb)	-564	chr2L	5000934	5001159	226	732.075	4.10745	104	1	4994084	5000370	6287	2	FBtr0079041	Others	Others	Others	Others	Others	Others	Others	Others	Others	Others	NA	-1.0634	1.8e-153	Others
FBgn0053113	Rtnl1	33721	Promoter (<=1kb)	-998	chr2L	5001368	5001697	330	211.804	3.63337	165	1	4994084	5000370	6287	2	FBtr0079041	Others	Others	Others	Others	Others	Others	Others	Others	Others	Others	NA	-1.0634	1.8e-153	Others
FBgn0053113	Rtnl1	33721	Promoter (1-2kb)	1560	chr2L	5003039	5003368	330	183.193	3.68553	165	1	4993641	5004928	11288	2	FBtr0079040	Others	Others	Others	Others	Others	Others	Others	Others	Others	Others	NA	-1.0634	1.8e-153	Others
FBgn0053113	Rtnl1	33721	Promoter (<=1kb)	-116	chr2L	5005044	5005275	232	679.66	4.10745	105	1	4993641	5004928	11288	2	FBtr0332413	Others	Others	Others	Others	Others	Others	Others	Others	Others	Others	NA	-1.0634	1.8e-153	Others
FBgn0053113	Rtnl1	33721	Promoter (<=1kb)	0	chr2L	5009654	5009928	275	868.277	4.10745	140	1	4993641	5009720	16080	2	FBtr0079038	Others	Others	Others	Others	Others	Others	Others	Others	Others	Others	NA	-1.0634	1.8e-153	Others
FBgn0031668	CG31917	326171	Promoter (<=1kb)	0	chr2L	5010827	5011075	249	556.824	4.10745	130	1	5009931	5010834	904	2	FBtr0079037	Others	Others	Others	Others	Others	Others	Others	Others	Others	Others	NA	NA	NA	Others
FBgn0031673	CG31650	326150	Promoter (<=1kb)	0	chr2L	5043077	5043332	256	857.209	4.10745	140	1	5040648	5043158	2511	2	FBtr0079034	Others	Others	Others	Others	Others	Others	Others	Others	Others	Others	NA	-0.58507	3.64e-06	Others
FBgn0031673	CG31650	326150	Promoter (<=1kb)	0	chr2L	5043743	5044072	330	202.956	3.65034	165	1	5040648	5044008	3361	2	FBtr0079033	Others	Others	Others	Others	Others	Others	Others	Others	Others	Others	NA	-0.58507	3.64e-06	Others
FBgn0264742	CG44000	14462701	Promoter (<=1kb)	0	chr2L	5045204	5045533	330	171.111	3.34121	165	1	5045397	5048365	2969	1	FBtr0334120	Others	Others	Others	Others	Others	Others	Others	Others	Others	Others	NA	NA	NA	Others
FBgn0022023	eIF3h	45682	Promoter (<=1kb)	189	chr2L	5052337	5052591	255	573.646	4.10745	158	1	5051193	5052780	1588	2	FBtr0079031	Others	Others	Others	Others	Others	Others	Others	Others	Others	Others	NA	-0.235824	1.26e-06	Others
FBgn0022023	eIF3h	45682	Promoter (<=1kb)	0	chr2L	5052680	5052934	255	510.76	4.10745	105	1	5051193	5052780	1588	2	FBtr0079031	Others	Others	Others	Others	Others	Others	Others	Others	Others	Others	NA	-0.235824	1.26e-06	Others
FBgn0014857	His3.3B	31848	Promoter (<=1kb)	0	chr2L	5054716	5055374	659	13538	4.10745	378	1	5055058	5055995	938	1	FBtr0079010	Others	Others	Others	Others	Others	Others	Others	Others	Others	Others	NA	-0.762118	3.01e-12	Others
FBgn0028694	Rpn11	33738	Promoter (<=1kb)	0	chr2L	5059779	5059913	135	291.435	4.10745	74	1	5058404	5059790	1387	2	FBtr0079027	Others	Others	Others	Others	Others	Others	Others	Others	Others	Others	NA	-0.728828	2.16e-33	Others
FBgn0028572	qtc	33739	Promoter (<=1kb)	395	chr2L	5061210	5061346	137	332.061	4.10745	74	1	5060815	5070750	9936	1	FBtr0100259	Others	Others	Others	Others	Others	Others	Others	Others	Others	Others	NA	0.446427	7.14e-05	Others
FBgn0261608	RpL37A	44783	Promoter (<=1kb)	0	chr2L	5070836	5071077	242	572.582	4.10745	117	1	5070957	5072055	1099	1	FBtr0302570	Others	Others	Others	Others	Others	Others	Others	Others	Others	Others	NA	-0.645314	2.46e-24	Others
FBgn0031681	Pgant5	326151	Intron (FBtr0079026/FBgn0031681, intron 2 of 9)	6144	chr2L	5087168	5087448	281	474.215	4.10745	128	1	5072170	5093592	21423	2	FBtr0079026	Others	Others	Others	Others	Others	Others	Others	Others	Others	Others	NA	-1.09794	1.12e-45	Others
FBgn0031681	Pgant5	326151	Promoter (<=1kb)	0	chr2L	5093299	5093628	330	155.39	2.82246	165	1	5072170	5093592	21423	2	FBtr0079026	Others	Others	Others	Others	Others	Others	Others	Others	Others	Others	NA	-1.09794	1.12e-45	Others
FBgn0031683	CG4230	33743	Promoter (<=1kb)	0	chr2L	5096205	5096534	330	324.526	4.10745	165	1	5096227	5098613	2387	1	FBtr0079019	Others	Others	Others	Others	Others	Others	Others	Others	Others	Others	NA	0.597282	1.19e-08	Others
FBgn0031684	ND-13A	33744	Promoter (<=1kb)	0	chr2L	5100046	5100375	330	255.532	4.10745	165	1	5099177	5100202	1026	2	FBtr0345333	Mitochondria	Others	Others	Others	Others	ETC	Others	Others	Others	Others	NA	-1.15452	1.39e-29	Mito_EBR
FBgn0261836	Msp300	3771968	Promoter (<=1kb)	-223	chr2L	5108046	5108289	244	457.929	4.10745	123	1	5108512	5207002	98491	1	FBtr0303385	Others	Others	Others	Others	Others	Others	Others	Others	Others	Others	NA	0.520238	1.43e-44	Others
FBgn0261836	Msp300	3771968	Intron (FBtr0303389/FBgn0261836, intron 2 of 28)	4679	chr2L	5113493	5113822	330	175.936	3.47767	165	1	5108814	5158263	49450	1	FBtr0303383	Others	Others	Others	Others	Others	Others	Others	Others	Others	Others	NA	0.520238	1.43e-44	Others
FBgn0003716	tkv	33753	Promoter (1-2kb)	-1541	chr2L	5245680	5245903	224	597.307	4.10745	116	1	5219000	5244139	25140	2	FBtr0079087	Others	Others	Others	Others	Others	Others	Others	Others	Others	Others	NA	0.0554304	0.889631	Others
FBgn0265957	lncRNA:CR44744	19835493	Intron (FBtr0079086/FBgn0003716, intron 1 of 3)	-4568	chr2L	5254242	5254374	133	316.694	4.10745	66	1	5258942	5259903	962	1	FBtr0342932	Others	Others	Others	Others	Others	Others	Others	Others	Others	Others	NA	NA	NA	Others
FBgn0265957	lncRNA:CR44744	19835493	Promoter (2-3kb)	-2684	chr2L	5256053	5256258	206	337.131	4.10745	114	1	5258942	5259903	962	1	FBtr0342932	Others	Others	Others	Others	Others	Others	Others	Others	Others	Others	NA	NA	NA	Others
FBgn0265957	lncRNA:CR44744	19835493	Promoter (2-3kb)	-2185	chr2L	5256531	5256757	227	471.125	4.10745	103	1	5258942	5259903	962	1	FBtr0342932	Others	Others	Others	Others	Others	Others	Others	Others	Others	Others	NA	NA	NA	Others
FBgn0265957	lncRNA:CR44744	19835493	Promoter (2-3kb)	2400	chr2L	5261342	5261522	181	342.871	4.10745	37	1	5258942	5259992	1051	1	FBtr0342933	Others	Others	Others	Others	Others	Others	Others	Others	Others	Others	NA	NA	NA	Others
FBgn0000228	Bsg25D	33757	Promoter (<=1kb)	0	chr2L	5278506	5278653	148	303.571	4.10745	39	1	5271728	5278548	6821	2	FBtr0079084	Others	Others	Others	Others	Others	Others	Others	Others	Others	Others	NA	0.806571	3.64e-08	Others
FBgn0016076	vri	33759	Intron (FBtr0342936/FBgn0016076, intron 1 of 2)	4275	chr2L	5293219	5293486	268	1003.75	4.10745	120	1	5288944	5310996	22053	1	FBtr0342936	Others	Others	Others	Others	Others	Others	Others	Others	Others	Others	Others	-0.0550328	0.682708	Others
FBgn0267294	lncRNA:CR45730	19836028	Promoter (<=1kb)	913	chr2L	5296686	5297015	330	169.823	3.3438	165	1	5297486	5297928	443	2	FBtr0346580	Others	Others	Others	Others	Others	Others	Others	Others	Others	Others	NA	NA	NA	Others
FBgn0267294	lncRNA:CR45730	19836028	Promoter (<=1kb)	351	chr2L	5297327	5297577	251	722.462	4.10745	140	1	5297486	5297928	443	2	FBtr0346580	Others	Others	Others	Others	Others	Others	Others	Others	Others	Others	NA	NA	NA	Others
FBgn0016076	vri	33759	Promoter (<=1kb)	-66	chr2L	5299326	5299581	256	545.413	4.10745	101	1	5299647	5310625	10979	1	FBtr0079070	Others	Others	Others	Others	Others	Others	Others	Others	Others	Others	Others	-0.0550328	0.682708	Others
FBgn0016076	vri	33759	Promoter (1-2kb)	-1695	chr2L	5303626	5303955	330	241.653	4.10745	165	1	5305650	5310610	4961	1	FBtr0300020	Others	Others	Others	Others	Others	Others	Others	Others	Others	Others	Others	-0.0550328	0.682708	Others
FBgn0016076	vri	33759	Promoter (<=1kb)	-652	chr2L	5304669	5304998	330	171.453	3.34064	165	1	5305650	5310610	4961	1	FBtr0300020	Others	Others	Others	Others	Others	Others	Others	Others	Others	Others	Others	-0.0550328	0.682708	Others
FBgn0031698	Ncoa6	33761	Promoter (<=1kb)	0	chr2L	5326670	5326849	180	358.6	4.10745	72	1	5315290	5326683	11394	2	FBtr0307041	Others	Others	Others	Others	Others	Others	Others	Others	Others	Others	NA	0.693536	2.7e-11	Others
FBgn0031702	fusl	33765	Promoter (<=1kb)	-682	chr2L	5338755	5338901	147	353.496	4.10745	68	1	5330470	5338073	7604	2	FBtr0307037	Others	Others	Others	Others	Others	Others	Others	Others	Others	Others	NA	-0.644528	0.000403153	Others
FBgn0031703	CG12512	33766	Promoter (<=1kb)	-263	chr2L	5342497	5342645	149	276.62	4.10745	76	1	5339132	5342234	3103	2	FBtr0079077	Mitochondria	Others	Others	Others	Others	Others	Others	Others	Others	Others	NA	-0.439808	5e-07	MitoOthers
FBgn0263866	lncRNA:CR43713	14462703	Distal Intergenic	-6170	chr2L	5425450	5425672	223	741.653	4.10745	110	1	5431842	5432604	763	1	FBtr0329835	Others	Others	Others	Others	Others	Others	Others	Others	Others	Others	NA	NA	NA	Others
FBgn0263866	lncRNA:CR43713	14462703	Distal Intergenic	-4703	chr2L	5426957	5427139	183	229.683	4.10745	95	1	5431842	5432604	763	1	FBtr0329835	Others	Others	Others	Others	Others	Others	Others	Others	Others	Others	NA	NA	NA	Others
FBgn0263868	lncRNA:CR43715	14462705	Promoter (<=1kb)	324	chr2L	5433822	5433912	91	163.703	3.08677	59	1	5433676	5434236	561	2	FBtr0343259	Others	Others	Others	Others	Others	Others	Others	Others	Others	Others	NA	NA	NA	Others
FBgn0261963	mid	33770	Distal Intergenic	-8296	chr2L	5453172	5453343	172	405.407	4.10745	85	1	5461639	5466829	5191	1	FBtr0310358	Others	Others	Others	Others	Others	Others	Others	Others	Others	Others	Others	0.605259	0.0815919	Others
FBgn0266825	lncRNA:CR45287	19835419	Distal Intergenic	-9910	chr2L	5476701	5476995	295	1523.99	4.10745	149	1	5486905	5487191	287	1	FBtr0345552	Others	Others	Others	Others	Others	Others	Others	Others	Others	Others	NA	NA	NA	Others
FBgn0266825	lncRNA:CR45287	19835419	Distal Intergenic	-6659	chr2L	5480123	5480246	124	195.218	3.66423	48	1	5486905	5487191	287	1	FBtr0345552	Others	Others	Others	Others	Others	Others	Others	Others	Others	Others	NA	NA	NA	Others
FBgn0266825	lncRNA:CR45287	19835419	Distal Intergenic	4421	chr2L	5491326	5491521	196	467.945	4.10745	82	1	5486905	5487191	287	1	FBtr0345552	Others	Others	Others	Others	Others	Others	Others	Others	Others	Others	NA	NA	NA	Others
FBgn0266825	lncRNA:CR45287	19835419	Distal Intergenic	9894	chr2L	5496799	5496998	200	515.9	4.10745	106	1	5486905	5487191	287	1	FBtr0345552	Others	Others	Others	Others	Others	Others	Others	Others	Others	Others	NA	NA	NA	Others
FBgn0266825	lncRNA:CR45287	19835419	Distal Intergenic	14443	chr2L	5501348	5501677	330	141.155	2.35326	165	1	5486905	5487191	287	1	FBtr0345552	Others	Others	Others	Others	Others	Others	Others	Others	Others	Others	NA	NA	NA	Others
FBgn0031711	CG6907	33775	Promoter (<=1kb)	0	chr2L	5524079	5524275	197	362.047	4.10745	134	1	5524139	5525809	1671	1	FBtr0079096	Others	Others	Others	Others	Others	Others	Others	Others	Others	Others	NA	-0.598663	2.81e-10	Others
FBgn0002525	Lam	33782	Promoter (<=1kb)	44	chr2L	5543144	5543285	142	405.166	4.10745	56	1	5543100	5546642	3543	1	FBtr0307058	Others	Others	Others	Others	Others	Others	Others	Others	Others	Others	NA	-0.592328	1.13e-14	Others
FBgn0266030	lncRNA:CR44795	19835033	Intron (FBtr0302933/FBgn0031725, intron 5 of 11)	-4829	chr2L	5610195	5610401	207	399.613	4.10745	94	1	5615230	5615661	432	1	FBtr0343242	Others	Others	Others	Others	Others	Others	Others	Others	Others	Others	NA	NA	NA	Others
FBgn0031736	CG11030	33805	Promoter (<=1kb)	-468	chr2L	5723943	5724188	246	444.436	4.10745	146	1	5724656	5760047	35392	1	FBtr0079135	Others	Others	Others	Others	Others	Others	Others	Others	Others	Others	NA	-0.592577	4.69e-11	Others
FBgn0031736	CG11030	33805	Promoter (<=1kb)	0	chr2L	5724522	5724680	159	312.132	4.10745	151	1	5724656	5760047	35392	1	FBtr0079135	Others	Others	Others	Others	Others	Others	Others	Others	Others	Others	NA	-0.592577	4.69e-11	Others
FBgn0031735	CG11029	33804	Promoter (2-3kb)	-2323	chr2L	5743669	5743834	166	281.675	4.10745	89	1	5746157	5747961	1805	1	FBtr0079136	Others	Others	Others	Others	Others	Others	Others	Others	Others	Others	NA	1.03642	0.000261851	Others
FBgn0031738	CG9171	33807	Intron (FBtr0301235/FBgn0031738, intron 3 of 7)	-4632	chr2L	5778230	5778559	330	174.308	3.4805	165	1	5767592	5773598	6007	2	FBtr0332039	Others	Others	Others	Others	Others	Others	Others	Others	Others	Others	NA	0.154332	0.320758	Others
FBgn0031738	CG9171	33807	Promoter (1-2kb)	1880	chr2L	5798069	5798293	225	428.263	4.10745	99	1	5767002	5800173	33172	2	FBtr0301235	Others	Others	Others	Others	Others	Others	Others	Others	Others	Others	NA	0.154332	0.320758	Others
FBgn0031738	CG9171	33807	Promoter (<=1kb)	346	chr2L	5799498	5799827	330	185.862	3.67976	165	1	5767002	5800173	33172	2	FBtr0301235	Others	Others	Others	Others	Others	Others	Others	Others	Others	Others	NA	0.154332	0.320758	Others
FBgn0031738	CG9171	33807	Promoter (<=1kb)	0	chr2L	5800195	5800440	246	1021.13	4.10745	134	1	5768253	5800253	32001	2	FBtr0301234	Others	Others	Others	Others	Others	Others	Others	Others	Others	Others	NA	0.154332	0.320758	Others
FBgn0031745	rau	33814	Intron (FBtr0079158/FBgn0031745, intron 1 of 3)	12295	chr2L	5866874	5867203	330	218.291	4.10745	165	1	5859769	5879498	19730	2	FBtr0079158	Others	Others	Others	Others	Others	Others	Others	Others	Others	Others	NA	0.924499	6.56e-06	Others
FBgn0031745	rau	33814	Promoter (2-3kb)	2685	chr2L	5876484	5876813	330	161.685	3.02941	165	1	5859769	5879498	19730	2	FBtr0079158	Others	Others	Others	Others	Others	Others	Others	Others	Others	Others	NA	0.924499	6.56e-06	Others
FBgn0031745	rau	33814	Promoter (<=1kb)	-110	chr2L	5879608	5879788	181	232.055	4.10745	54	1	5859769	5879498	19730	2	FBtr0342620	Others	Others	Others	Others	Others	Others	Others	Others	Others	Others	NA	0.924499	6.56e-06	Others
FBgn0043362	bchs	33819	Promoter (<=1kb)	0	chr2L	5907012	5907183	172	408.582	4.10745	86	1	5907169	5922776	15608	1	FBtr0079144	Others	Others	Others	Others	Others	Others	Others	Others	Others	Others	NA	1.10439	1.06e-08	Others
FBgn0001128	Gpdh1	33824	Promoter (<=1kb)	0	chr2L	5943555	5943833	279	676.016	4.10745	117	1	5943643	5947617	3975	1	FBtr0333228	Mitochondria	Others	Others	Others	Others	Others	Others	Others	Others	Others	NA	NA	NA	MitoOthers
FBgn0263442	asRNA:CR43465	12798571	Promoter (1-2kb)	-1105	chr2L	5972130	5972303	174	390.522	4.10745	121	1	5969859	5971025	1167	2	FBtr0309287	Others	Others	Others	Others	Others	Others	Others	Others	Others	Others	NA	NA	NA	Others
FBgn0263442	asRNA:CR43465	12798571	Intron (FBtr0079236/FBgn0000308, intron 3 of 3)	-3317	chr2L	5974342	5974429	88	224.513	4.10745	55	1	5969859	5971025	1167	2	FBtr0309287	Others	Others	Others	Others	Others	Others	Others	Others	Others	Others	NA	NA	NA	Others
FBgn0000308	chic	33834	Promoter (<=1kb)	0	chr2L	5981013	5981226	214	522.025	4.10745	58	1	5972115	5981018	8904	2	FBtr0079236	Others	Others	Others	Others	Others	Others	Others	Others	Others	Others	NA	-0.760345	4.75e-94	Others
FBgn0001942	eIF4A	33835	Promoter (<=1kb)	-3	chr2L	5981475	5981761	287	428.925	4.10745	172	1	5981764	5985559	3796	1	FBtr0079176	Others	Others	Others	Others	Others	Others	Others	Others	Others	Others	NA	0.898734	1.62e-144	Others
FBgn0001942	eIF4A	33835	Promoter (<=1kb)	0	chr2L	5982361	5982690	330	345.807	4.10745	165	1	5982363	5985579	3217	1	FBtr0079178	Others	Others	Others	Others	Others	Others	Others	Others	Others	Others	NA	0.898734	1.62e-144	Others
FBgn0001941	ifc	33836	Promoter (<=1kb)	0	chr2L	5986107	5986406	300	1022.19	4.10745	163	1	5986348	5988854	2507	1	FBtr0079179	Others	Others	Others	Others	Others	Others	Others	Others	Others	Others	NA	-0.116678	0.0241299	Others
FBgn0031759	lid	33837	Promoter (<=1kb)	0	chr2L	5999411	5999654	244	686.088	4.10745	126	1	5989400	5999501	10102	2	FBtr0345336	Others	Others	Others	Others	Others	Others	Others	Others	Others	Others	NA	0.853078	1.23e-15	Others
FBgn0001170	H2.0	33841	Promoter (<=1kb)	-201	chr2L	6019603	6019745	143	350.92	4.10745	64	1	6013059	6019402	6344	2	FBtr0079227	Others	Others	Others	Others	Others	Others	Others	Others	Others	Others	Others	1.15361	3.58e-08	Others
FBgn0031764	CG9107	33843	Promoter (<=1kb)	0	chr2L	6024462	6024653	192	493.644	4.10745	97	1	6022951	6024539	1589	2	FBtr0079225	Others	Others	Others	Others	Others	Others	Others	Others	Others	Others	NA	-0.620575	4.99e-06	Others
FBgn0031764	CG9107	33843	Intron (FBtr0079224/FBgn0031765, intron 6 of 6)	-4280	chr2L	6028819	6028976	158	246.438	4.10745	76	1	6023563	6024539	977	2	FBtr0079226	Others	Others	Others	Others	Others	Others	Others	Others	Others	Others	NA	-0.620575	4.99e-06	Others
FBgn0025742	mtm	33845	Promoter (<=1kb)	0	chr2L	6036881	6036988	108	328.609	4.10745	48	1	6034796	6036917	2122	2	FBtr0079223	Others	Others	Others	Others	Others	Others	Others	Others	Others	Others	NA	-0.178153	0.113838	Others
FBgn0031766	CG9117	33846	Promoter (<=1kb)	-4	chr2L	6037906	6038101	196	463.103	4.10745	88	1	6036997	6037902	906	2	FBtr0079222	Others	Others	Others	Others	Others	Others	Others	Others	Others	Others	NA	-0.610646	0.232047	Others
FBgn0000052	Pfas	33847	Promoter (<=1kb)	-22	chr2L	6046072	6046190	119	357.763	4.10745	16	1	6041181	6046050	4870	2	FBtr0079220	Others	Others	Others	Others	Others	Others	Others	Others	Others	Others	NA	-0.262129	0.0419137	Others
FBgn0029161	slmo	44132	Promoter (<=1kb)	0	chr2L	6047897	6048075	179	432.166	4.10745	82	1	6046516	6047934	1419	2	FBtr0343130	Mitochondria	Others	Others	Others	Others	Others	Others	Others	Others	Others	NA	-1.2128	4.59e-10	MitoOthers
FBgn0029161	slmo	44132	Promoter (<=1kb)	0	chr2L	6048564	6048893	330	165.911	3.24251	165	1	6046651	6048706	2056	2	FBtr0112945	Mitochondria	Others	Others	Others	Others	Others	Others	Others	Others	Others	NA	-1.2128	4.59e-10	MitoOthers
FBgn0031769	CG9135	33850	Promoter (<=1kb)	0	chr2L	6050696	6050874	179	429.393	4.10745	103	1	6050800	6053482	2683	1	FBtr0346135	Others	Others	Others	Others	Others	Others	Others	Others	Others	Others	NA	-0.710809	2.58e-14	Others
FBgn0031769	CG9135	33850	Promoter (<=1kb)	437	chr2L	6051276	6051585	310	2141.42	4.10745	166	1	6050839	6053877	3039	1	FBtr0343121	Others	Others	Others	Others	Others	Others	Others	Others	Others	Others	NA	-0.710809	2.58e-14	Others
FBgn0031771	ND-51	33852	Promoter (<=1kb)	0	chr2L	6062698	6062982	285	780.25	4.10745	153	1	6060842	6062720	1879	2	FBtr0343129	Mitochondria	Others	Others	Others	Others	ETC	Others	Others	Others	Others	NA	-0.631865	1.64e-58	Mito_EBR
FBgn0031773	Fbw5	33854	Promoter (<=1kb)	0	chr2L	6065924	6066267	344	5546.68	4.10745	178	1	6063562	6065953	2392	2	FBtr0079215	Others	Others	Others	Others	Others	Others	Others	Others	Others	Others	NA	-0.406575	0.00148845	Others
FBgn0031776	Pfdn1	33857	Promoter (<=1kb)	0	chr2L	6069038	6069120	83	235.06	4.10745	42	1	6069079	6069838	760	1	FBtr0079191	Others	Others	Others	Others	Others	Others	Others	Others	Others	Others	NA	-1.15938	1.98e-11	Others
FBgn0266449	Kr-h2	33859	Promoter (<=1kb)	0	chr2L	6070910	6071092	183	343.257	4.10745	100	1	6070990	6073961	2972	1	FBtr0079192	Others	Others	Others	Others	Others	Others	Others	Others	Others	Others	NA	-0.464456	1.03e-20	Others
FBgn0266450	Kr-h1	33861	Promoter (<=1kb)	257	chr2L	6082860	6083189	330	182.862	3.68619	165	1	6082603	6096498	13896	1	FBtr0344437	Others	Others	Others	Others	Others	Others	Others	Others	Others	Others	Others	0.576505	0.0625613	Others
FBgn0266445	CG45075	19834937	Promoter (2-3kb)	-2735	chr2L	6088348	6088677	330	173.625	3.48193	165	1	6091412	6096498	5087	1	FBtr0344439	Others	Others	Others	Others	Others	Others	Others	Others	Others	Others	NA	NA	NA	Others
FBgn0266445	CG45075	19834937	Promoter (<=1kb)	0	chr2L	6091294	6091623	330	143.879	2.41892	165	1	6091412	6096498	5087	1	FBtr0344439	Others	Others	Others	Others	Others	Others	Others	Others	Others	Others	NA	NA	NA	Others
FBgn0031779	CG9175	33862	Promoter (<=1kb)	0	chr2L	6098913	6099197	285	934.791	4.10745	125	1	6096698	6098966	2269	2	FBtr0079211	Others	Others	Others	Others	Others	Others	Others	Others	Others	Others	NA	-0.730519	1.98e-09	Others
FBgn0284255	Arpc4	33864	Promoter (<=1kb)	0	chr2L	6124838	6125153	316	622.644	4.10745	199	1	6125132	6125911	780	1	FBtr0079200	Others	Others	Others	Others	Others	Others	Others	Others	Others	Others	NA	-0.466268	6.45e-07	Others
FBgn0031782	WDR79	33865	Promoter (<=1kb)	0	chr2L	6127606	6127752	147	383.307	4.10745	64	1	6125879	6127653	1775	2	FBtr0333407	Others	Others	Others	Others	Others	Others	Others	Others	Others	Others	NA	0.750248	9.97e-12	Others
FBgn0085409	smal	5740323	Distal Intergenic	-7747	chr2L	6171261	6171386	126	172.171	3.33945	67	1	6179133	6209477	30345	1	FBtr0112617	Others	Others	Others	Others	Others	Others	Others	Others	Others	Others	NA	1.61845	1.02e-16	Others
FBgn0085409	smal	5740323	Promoter (<=1kb)	0	chr2L	6179028	6179357	330	218.415	4.10745	165	1	6179133	6209477	30345	1	FBtr0112617	Others	Others	Others	Others	Others	Others	Others	Others	Others	Others	NA	1.61845	1.02e-16	Others
FBgn0085409	smal	5740323	5' UTR	11000	chr2L	6190133	6190462	330	141.044	2.35365	165	1	6179133	6211114	31982	1	FBtr0329980	Others	Others	Others	Others	Others	Others	Others	Others	Others	Others	NA	1.61845	1.02e-16	Others
FBgn0085409	smal	5740323	Intron (FBtr0112617/FBgn0085409, intron 6 of 12)	22377	chr2L	6201510	6201839	330	195.962	3.66304	165	1	6179133	6211114	31982	1	FBtr0329980	Others	Others	Others	Others	Others	Others	Others	Others	Others	Others	NA	1.61845	1.02e-16	Others
FBgn0026755	Ugt37B1	53584	Distal Intergenic	-5808	chr2L	6218911	6219240	330	157.72	2.93622	165	1	6225048	6226842	1795	1	FBtr0079242	Others	Others	Others	Others	Others	Others	Others	Others	Others	Others	NA	-3.67086	7.15e-77	Others
FBgn0286891	NA	NA	Intron (FBtr0340169/FBgn0053531, intron 3 of 6)	-8944	chr2L	6280447	6280632	186	297.48	4.10745	78	1	6271073	6271503	431	2	FBtr0475067	Others	Others	Others	Others	Others	Others	Others	Others	Others	Others	NA	NA	NA	Others
FBgn0286891	NA	NA	Intron (FBtr0340169/FBgn0053531, intron 3 of 6)	-11871	chr2L	6283374	6283557	184	348.181	4.10745	127	1	6271073	6271503	431	2	FBtr0475067	Others	Others	Others	Others	Others	Others	Others	Others	Others	Others	NA	NA	NA	Others
FBgn0264543	CG43922	14462712	Intron (FBtr0344771/FBgn0053531, intron 7 of 16)	16830	chr2L	6291838	6291921	84	229.883	4.10745	81	1	6308377	6308751	375	2	FBtr0333243	Others	Others	Others	Others	Others	Others	Others	Others	Others	Others	NA	NA	NA	Others
FBgn0264543	CG43922	14462712	Promoter (1-2kb)	1556	chr2L	6307038	6307195	158	255.767	4.10745	86	1	6308377	6308751	375	2	FBtr0333243	Others	Others	Others	Others	Others	Others	Others	Others	Others	Others	NA	NA	NA	Others
FBgn0265778	PDZ-GEF	33881	Intron (FBtr0344771/FBgn0053531, intron 14 of 16)	-4173	chr2L	6319265	6319594	330	186.98	3.67776	165	1	6323767	6331750	7984	1	FBtr0079249	Others	Others	Others	Others	Others	Others	Others	Others	Others	Others	NA	0.434489	0.0284591	Others
FBgn0015623	Cpr	33883	Promoter (<=1kb)	346	chr2L	6339182	6339329	148	320.49	4.10745	87	1	6338836	6346280	7445	1	FBtr0079250	Others	Others	Others	Others	Others	Others	Others	Others	Others	Others	NA	0.860171	1.96e-72	Others
FBgn0015623	Cpr	33883	Promoter (<=1kb)	0	chr2L	6339666	6339829	164	176.227	3.47721	151	1	6339825	6346280	6456	1	FBtr0331224	Others	Others	Others	Others	Others	Others	Others	Others	Others	Others	NA	0.860171	1.96e-72	Others
FBgn0031801	CG9498	33885	Promoter (<=1kb)	-876	chr2L	6351910	6352104	195	263.675	4.10745	75	1	6349393	6351034	1642	2	FBtr0079282	Others	Others	Others	Others	Others	Others	Others	Others	Others	Others	NA	-1.52603	2.42e-114	Others
FBgn0031804	CG9500	33888	Promoter (1-2kb)	1102	chr2L	6357021	6357216	196	447.355	4.10745	113	1	6357005	6358318	1314	2	FBtr0473626	Others	Others	Others	Others	Others	Others	Others	Others	Others	Others	NA	0.779973	0.213614	Others
FBgn0031814	retm	33899	Promoter (<=1kb)	326	chr2L	6455274	6455603	330	159.971	2.9792	165	1	6448464	6455929	7466	2	FBtr0339788	Others	Others	Others	Others	Others	Others	Others	Others	Others	Others	NA	0.000333478	0.984412	Others
FBgn0031814	retm	33899	Promoter (<=1kb)	0	chr2L	6455898	6456329	432	863.486	4.10745	159	1	6448464	6455929	7466	2	FBtr0339788	Others	Others	Others	Others	Others	Others	Others	Others	Others	Others	NA	0.000333478	0.984412	Others
FBgn0031816	Rchy1	33901	Intron (FBtr0079271/FBgn0031816, intron 2 of 5)	3831	chr2L	6461681	6461838	158	354.927	4.10745	49	1	6459015	6465669	6655	2	FBtr0079271	Others	Others	Others	Others	Others	Others	Others	Others	Others	Others	NA	-0.20983	0.0969716	Others
FBgn0031816	Rchy1	33901	Promoter (<=1kb)	0	chr2L	6465571	6465900	330	141.523	2.36337	165	1	6459015	6465669	6655	2	FBtr0079271	Others	Others	Others	Others	Others	Others	Others	Others	Others	Others	NA	-0.20983	0.0969716	Others
FBgn0031817	HemK1	33902	Promoter (<=1kb)	0	chr2L	6467612	6467852	241	751.099	4.10745	114	1	6466217	6467698	1482	2	FBtr0079270	Mitochondria	Others	Others	Others	Others	Others	Others	Others	Others	Others	NA	-1.02402	3.02e-13	MitoOthers
FBgn0259749	mmy	33903	Promoter (<=1kb)	0	chr2L	6473858	6474054	197	399.782	4.10745	74	1	6468538	6473904	5367	2	FBtr0339787	Others	Others	Others	Others	Others	Others	Others	Others	Others	Others	NA	0.313349	7.04e-08	Others
FBgn0031818	CG9536	33904	Promoter (<=1kb)	0	chr2L	6476841	6477170	330	309.778	4.10745	165	1	6474438	6476975	2538	2	FBtr0079267	Others	Others	Others	Others	Others	Others	Others	Others	Others	Others	NA	-0.504196	5.3e-07	Others
FBgn0086357	Sec61alpha	33905	Promoter (<=1kb)	962	chr2L	6479175	6479504	330	202.346	3.65157	165	1	6477182	6480466	3285	2	FBtr0079266	Others	Others	Others	Others	Others	Others	Others	Others	Others	Others	NA	-2.11203	0	Others
FBgn0086357	Sec61alpha	33905	Promoter (<=1kb)	487	chr2L	6479650	6479979	330	155.27	2.82272	165	1	6477182	6480466	3285	2	FBtr0079266	Others	Others	Others	Others	Others	Others	Others	Others	Others	Others	NA	-2.11203	0	Others
FBgn0031820	Daxx	33906	Promoter (<=1kb)	0	chr2L	6480524	6480988	465	332.398	4.10745	301	1	6480929	6487166	6238	1	FBtr0344764	Others	Others	Others	Others	Others	Others	Others	Others	Others	Others	NA	0.5776	2.14e-06	Others
FBgn0267019	lncRNA:CR45463	19834871	Promoter (<=1kb)	-407	chr2L	6481337	6481666	330	313.687	4.10745	165	1	6480661	6480930	270	2	FBtr0345975	Others	Others	Others	Others	Others	Others	Others	Others	Others	Others	NA	NA	NA	Others
FBgn0031821	KFase	33907	Promoter (<=1kb)	0	chr2L	6488754	6488897	144	191.661	3.66879	54	1	6487342	6488756	1415	2	FBtr0339785	Others	Others	Others	Others	Others	Others	Others	Others	Others	Others	NA	NA	NA	Others
FBgn0031822	Phf5a	33909	Promoter (<=1kb)	0	chr2L	6490791	6490945	155	274.45	4.10745	73	1	6490155	6490843	689	2	FBtr0079264	Others	Others	Others	Others	Others	Others	Others	Others	Others	Others	NA	-1.22614	8.35e-13	Others
FBgn0051638	CG31638	33910	Promoter (<=1kb)	0	chr2L	6490986	6491083	98	142.394	2.39664	84	1	6491061	6496988	5928	1	FBtr0079262	Others	Others	Others	Others	Others	Others	Others	Others	Others	Others	NA	0.254292	0.201261	Others
FBgn0051637	CG31637	33914	Promoter (<=1kb)	0	chr2L	6498480	6498681	202	748.121	4.10745	122	1	6498647	6526919	28273	1	FBtr0343155	Others	Others	Others	Others	Others	Others	Others	Others	Others	Others	NA	-0.126516	0.360344	Others
FBgn0266001	lncRNA:CR44775	19835092	Promoter (<=1kb)	-384	chr2L	6508788	6508952	165	283.21	4.10745	64	1	6507424	6508404	981	2	FBtr0343164	Others	Others	Others	Others	Others	Others	Others	Others	Others	Others	NA	NA	NA	Others
FBgn0266002	lncRNA:CR44776	19836100	Promoter (1-2kb)	1493	chr2L	6553347	6553676	330	148.677	2.49453	165	1	6551854	6552436	583	1	FBtr0343156	Others	Others	Others	Others	Others	Others	Others	Others	Others	Others	NA	NA	NA	Others
FBgn0031829	IFT52	33917	Promoter (<=1kb)	0	chr2L	6557438	6557602	165	255.27	4.10745	76	1	6555717	6557502	1786	2	FBtr0079333	Others	Others	Others	Others	Others	Others	Others	Others	Others	Others	NA	1.53938	0.083003	Others
FBgn0031832	CG9596	33920	Promoter (<=1kb)	0	chr2L	6561589	6561877	289	435.079	4.10745	123	1	6559426	6561660	2235	2	FBtr0343162	Others	Others	Others	Others	Others	Others	Others	Others	Others	Others	NA	-1.22997	4.27e-10	Others
FBgn0031832	CG9596	33920	Promoter (<=1kb)	0	chr2L	6562002	6562375	374	2301.7	4.10745	208	1	6560131	6562289	2159	2	FBtr0343163	Others	Others	Others	Others	Others	Others	Others	Others	Others	Others	NA	-1.22997	4.27e-10	Others
FBgn0031835	CG11319	33923	Promoter (<=1kb)	-147	chr2L	6601215	6601487	273	604.736	4.10745	128	1	6571954	6601068	29115	2	FBtr0343159	Others	Others	Others	Others	Others	Others	Others	Others	Others	Others	NA	1.91654	2.72e-17	Others
FBgn0031836	CG11050	33924	Promoter (<=1kb)	0	chr2L	6610702	6611101	400	1232.6	4.10745	189	1	6611011	6617117	6107	1	FBtr0079291	Mitochondria	Others	Others	Others	Others	Others	Others	Others	Others	Others	NA	0.32214	3.63e-07	MitoOthers
FBgn0031836	CG11050	33924	Promoter (<=1kb)	829	chr2L	6612516	6612903	388	8178.71	4.10745	194	1	6611687	6617117	5431	1	FBtr0079293	Mitochondria	Others	Others	Others	Others	Others	Others	Others	Others	Others	NA	0.32214	3.63e-07	MitoOthers
FBgn0085374	CG34345	5740402	Promoter (<=1kb)	-280	chr2L	6622743	6622832	90	376.531	4.10745	84	1	6623112	6625359	2248	1	FBtr0112553	Others	Others	Others	Others	Others	Others	Others	Others	Others	Others	NA	5.65989	0.286146	Others
FBgn0051635	CG31635	33928	Promoter (<=1kb)	763	chr2L	6647043	6647382	340	2650.41	4.10745	168	1	6632798	6648145	15348	2	FBtr0331187	Others	Others	Others	Others	Others	Others	Others	Others	Others	Others	NA	1.11354	4.29e-20	Others
FBgn0051635	CG31635	33928	Promoter (<=1kb)	0	chr2L	6648140	6648529	390	682.444	4.10745	152	1	6632798	6648145	15348	2	FBtr0331187	Others	Others	Others	Others	Others	Others	Others	Others	Others	Others	NA	1.11354	4.29e-20	Others
FBgn0085339	CG34310	5740536	Promoter (<=1kb)	0	chr2L	6673743	6673987	245	453.802	4.10745	117	1	6673964	6674741	778	1	FBtr0112506	Others	Others	Others	Others	Others	Others	Others	Others	Others	Others	NA	-1.57129	2.97e-49	Others
FBgn0031848	Nse1	33938	Promoter (<=1kb)	0	chr2L	6677577	6677750	174	437.627	4.10745	89	1	6676649	6677625	977	2	FBtr0333349	Others	Others	Others	Others	Others	Others	Others	Others	Others	Others	NA	-0.512394	0.1789	Others
FBgn0028703	Nhe3	33939	Promoter (<=1kb)	0	chr2L	6684351	6684609	259	428.675	4.10745	93	1	6677835	6684357	6523	2	FBtr0273247	Others	Others	Others	Others	Others	Others	Others	Others	Others	Others	NA	1.20098	9.61e-38	Others
FBgn0028703	Nhe3	33939	Promoter (<=1kb)	-337	chr2L	6684701	6684920	220	161.667	3.02952	107	1	6677835	6684364	6530	2	FBtr0300327	Others	Others	Others	Others	Others	Others	Others	Others	Others	Others	NA	1.20098	9.61e-38	Others
FBgn0031850	Tsp	33941	Intron (FBtr0079312/FBgn0031850, intron 8 of 12)	-4325	chr2L	6693718	6694047	330	150.537	2.57777	165	1	6686791	6689393	2603	2	FBtr0114489	Others	Others	Others	Others	Others	Others	Others	Others	Others	Others	NA	0.249702	7.07e-05	Others
FBgn0031850	Tsp	33941	Intron (FBtr0079312/FBgn0031850, intron 6 of 12)	-9101	chr2L	6698494	6698682	189	482.194	4.10745	95	1	6686791	6689393	2603	2	FBtr0114489	Others	Others	Others	Others	Others	Others	Others	Others	Others	Others	NA	0.249702	7.07e-05	Others
FBgn0031850	Tsp	33941	Intron (FBtr0079312/FBgn0031850, intron 2 of 12)	7682	chr2L	6700729	6700920	192	483.919	4.10745	107	1	6689625	6708602	18978	2	FBtr0079314	Others	Others	Others	Others	Others	Others	Others	Others	Others	Others	NA	0.249702	7.07e-05	Others
FBgn0031850	Tsp	33941	Intron (FBtr0079312/FBgn0031850, intron 2 of 12)	6944	chr2L	6701518	6701658	141	303.1	4.10745	39	1	6689625	6708602	18978	2	FBtr0079314	Others	Others	Others	Others	Others	Others	Others	Others	Others	Others	NA	0.249702	7.07e-05	Others
FBgn0031851	Aatf	33943	Promoter (<=1kb)	0	chr2L	6717481	6717630	150	410.784	4.10745	114	1	6717625	6719389	1765	1	FBtr0079299	Others	Others	Others	Others	Others	Others	Others	Others	Others	Others	NA	0.523279	6.09e-06	Others
FBgn0025777	homer	33944	Promoter (<=1kb)	0	chr2L	6723325	6723408	84	156.554	2.85578	72	1	6719394	6723359	3966	2	FBtr0329892	Others	Others	Others	Others	Others	Others	Others	Others	Others	Others	NA	-0.284826	0.0333664	Others
FBgn0015776	nrv1	33952	Promoter (<=1kb)	-124	chr2L	6786985	6787379	395	608.798	4.10745	191	1	6778824	6786861	8038	2	FBtr0332370	Others	Others	Others	Others	Others	Others	Others	Others	Others	Others	NA	-0.234073	1.56e-05	Others
FBgn0015776	nrv1	33952	Promoter (<=1kb)	-649	chr2L	6787510	6787748	239	556.262	4.10745	140	1	6778824	6786861	8038	2	FBtr0332370	Others	Others	Others	Others	Others	Others	Others	Others	Others	Others	NA	-0.234073	1.56e-05	Others
FBgn0015776	nrv1	33952	Promoter (1-2kb)	-1166	chr2L	6788027	6788271	245	472.971	4.10745	126	1	6778824	6786861	8038	2	FBtr0332370	Others	Others	Others	Others	Others	Others	Others	Others	Others	Others	NA	-0.234073	1.56e-05	Others
FBgn0015777	nrv2	33953	Promoter (<=1kb)	-741	chr2L	6795340	6795669	330	206.804	3.64309	165	1	6789770	6794599	4830	2	FBtr0100381	Others	Others	Others	Others	Others	Others	Others	Others	Others	Others	NA	0.0847378	0.167984	Others
FBgn0015777	nrv2	33953	Promoter (<=1kb)	488	chr2L	6797494	6797706	213	321.863	4.10745	135	1	6789770	6798194	8425	2	FBtr0332369	Others	Others	Others	Others	Others	Others	Others	Others	Others	Others	NA	0.0847378	0.167984	Others
FBgn0051632	sens-2	33957	Distal Intergenic	-3235	chr2L	6818370	6818699	330	261.762	4.10745	165	1	6821934	6838995	17062	1	FBtr0345446	Others	Others	Others	Others	Others	Others	Others	Others	Others	Others	Others	0.209761	0.610213	Others
FBgn0051632	sens-2	33957	Promoter (2-3kb)	-2082	chr2L	6819523	6819852	330	196.284	3.66235	165	1	6821934	6838995	17062	1	FBtr0345446	Others	Others	Others	Others	Others	Others	Others	Others	Others	Others	Others	0.209761	0.610213	Others
FBgn0051632	sens-2	33957	Promoter (<=1kb)	0	chr2L	6821786	6821937	152	526.735	4.10745	63	1	6821934	6838995	17062	1	FBtr0345446	Others	Others	Others	Others	Others	Others	Others	Others	Others	Others	Others	0.209761	0.610213	Others
FBgn0051632	sens-2	33957	Intron (FBtr0345446/FBgn0051632, intron 4 of 4)	11390	chr2L	6833707	6834036	330	183.092	3.68577	165	1	6822317	6838995	16679	1	FBtr0079341	Others	Others	Others	Others	Others	Others	Others	Others	Others	Others	Others	0.209761	0.610213	Others
FBgn0017551	Rca1	33959	Distal Intergenic	-10638	chr2L	6841413	6841677	265	1040.3	4.10745	122	1	6852315	6853866	1552	1	FBtr0079342	Others	Others	Others	Others	Others	Others	Others	Others	Others	Others	NA	0.310889	0.190058	Others
FBgn0017551	Rca1	33959	Promoter (<=1kb)	-72	chr2L	6852126	6852243	118	357.162	4.10745	39	1	6852315	6853866	1552	1	FBtr0079342	Others	Others	Others	Others	Others	Others	Others	Others	Others	Others	NA	0.310889	0.190058	Others
FBgn0086451	l(2)k09022	33960	Promoter (<=1kb)	0	chr2L	6853986	6854209	224	649.859	4.10745	105	1	6854142	6860849	6708	1	FBtr0079343	Others	Others	Others	Others	Others	Others	Others	Others	Others	Others	NA	-0.543181	0.00261279	Others
FBgn0026196	nop5	33966	Promoter (<=1kb)	0	chr2L	6918577	6918906	330	298.109	4.10745	165	1	6916753	6918743	1991	2	FBtr0079369	Others	Others	Others	Others	Others	Others	Others	Others	Others	Others	NA	-0.918433	7.35e-37	Others
FBgn0026196	nop5	33966	Promoter (<=1kb)	-427	chr2L	6919170	6919499	330	155.436	2.82225	165	1	6916753	6918743	1991	2	FBtr0079369	Others	Others	Others	Others	Others	Others	Others	Others	Others	Others	NA	-0.918433	7.35e-37	Others
FBgn0004838	Hrb27C	33968	Promoter (<=1kb)	826	chr2L	6922465	6922693	229	665.011	4.10745	122	1	6921639	6932057	10419	1	FBtr0079348	Others	Others	Others	Others	Others	Others	Others	Others	Others	Others	NA	-0.454335	3.78e-34	Others
FBgn0031871	Fgop2	33971	Promoter (<=1kb)	0	chr2L	6945246	6945372	127	315.703	4.10745	55	1	6943178	6945289	2112	2	FBtr0332325	Others	Others	Others	Others	Others	Others	Others	Others	Others	Others	NA	-0.0268295	0.852584	Others
FBgn0031872	ihog	33972	Promoter (<=1kb)	0	chr2L	6948615	6948944	330	290.508	4.10745	165	1	6945464	6948808	3345	2	FBtr0079365	Others	Others	Others	Others	Others	Others	Others	Others	Others	Others	NA	-0.410799	0.0290406	Others
FBgn0020616	SA	33974	Promoter (<=1kb)	0	chr2L	6950286	6950449	164	267.367	4.10745	99	1	6950421	6954586	4166	1	FBtr0079349	Others	Others	Others	Others	Others	Others	Others	Others	Others	Others	NA	-0.316113	0.0261084	Others
FBgn0264922	smt3	33981	Promoter (<=1kb)	0	chr2L	6967565	6967790	226	430.649	4.10745	73	1	6966780	6967590	811	2	FBtr0346716	Others	Others	Others	Others	Others	Others	Others	Others	Others	Others	NA	-1.26408	6.51e-83	Others
FBgn0264922	smt3	33981	Promoter (<=1kb)	-647	chr2L	6968291	6968517	227	467.321	4.10745	87	1	6966780	6967644	865	2	FBtr0079356	Others	Others	Others	Others	Others	Others	Others	Others	Others	Others	NA	-1.26408	6.51e-83	Others
FBgn0000053	Gart	33986	Promoter (<=1kb)	-114	chr2L	7024012	7024265	254	644.774	4.10745	126	1	7018087	7023898	5812	2	FBtr0100353	Others	Others	Others	Others	Others	Others	Others	Others	Others	Others	NA	NA	NA	Others
FBgn0051908	CG31908	261613	Promoter (<=1kb)	0	chr2L	7027057	7027386	330	263.499	4.10745	165	1	7024829	7027287	2459	2	FBtr0079429	Others	Others	Others	Others	Others	Others	Others	Others	Others	Others	NA	-0.304394	3.12e-05	Others
FBgn0031882	Rab30	33988	Promoter (<=1kb)	0	chr2L	7032531	7032819	289	917.96	4.10745	129	1	7030493	7032606	2114	2	FBtr0079426	Others	Others	Others	Others	Others	Others	Others	Others	Others	Others	NA	0.643178	8.65e-06	Others
FBgn0031883	Caper	33989	Promoter (<=1kb)	654	chr2L	7033375	7033704	330	279.129	4.10745	165	1	7032721	7037878	5158	1	FBtr0344711	Others	Others	Others	Others	Others	Others	Others	Others	Others	Others	NA	0.0898125	0.411381	Others
FBgn0262872	milt	45683	Promoter (<=1kb)	98	chr2L	7037921	7038062	142	421.173	4.10745	78	1	7037823	7056010	18188	1	FBtr0306229	Others	Others	Others	Others	Others	Others	Others	Others	Others	Others	NA	0.226631	0.0138719	Others
FBgn0262872	milt	45683	Promoter (1-2kb)	1566	chr2L	7039389	7039498	110	267.096	4.10745	40	1	7037823	7056010	18188	1	FBtr0306229	Others	Others	Others	Others	Others	Others	Others	Others	Others	Others	NA	0.226631	0.0138719	Others
FBgn0262872	milt	45683	Promoter (<=1kb)	0	chr2L	7042151	7042433	283	938.719	4.10745	161	1	7042359	7056010	13652	1	FBtr0306231	Others	Others	Others	Others	Others	Others	Others	Others	Others	Others	NA	0.226631	0.0138719	Others
FBgn0262872	milt	45683	Promoter (<=1kb)	798	chr2L	7043157	7043287	131	274.956	4.10745	127	1	7042359	7056010	13652	1	FBtr0306233	Others	Others	Others	Others	Others	Others	Others	Others	Others	Others	NA	0.226631	0.0138719	Others
FBgn0262872	milt	45683	Promoter (<=1kb)	0	chr2L	7048989	7049318	330	155.546	2.82183	165	1	7049272	7054847	5576	1	FBtr0306232	Others	Others	Others	Others	Others	Others	Others	Others	Others	Others	NA	0.226631	0.0138719	Others
FBgn0031885	Mnn1	33991	Promoter (<=1kb)	0	chr2L	7056165	7056398	234	898.984	4.10745	122	1	7056301	7059294	2994	1	FBtr0079402	Others	Others	Others	Others	Others	Others	Others	Others	Others	Others	NA	1.67119	1.69e-47	Others
FBgn0266666	Sem1	50428	Promoter (<=1kb)	0	chr2L	7063826	7064155	330	198.291	3.65849	165	1	7063986	7064467	482	1	FBtr0079403	Others	Others	Others	Others	Others	Others	Others	Others	Others	Others	NA	-1.42736	1.07e-18	Others
FBgn0031886	Nuf2	33992	Promoter (<=1kb)	0	chr2L	7065792	7066017	226	607.529	4.10745	122	1	7064431	7065837	1407	2	FBtr0079424	Others	Others	Others	Others	Others	Others	Others	Others	Others	Others	NA	-1.50449	1.78e-05	Others
FBgn0031887	Ugt307A1	33993	Intron (FBtr0079423/FBgn0031888, intron 3 of 4)	5188	chr2L	7073171	7073333	163	249.631	4.10745	77	1	7067983	7069546	1564	1	FBtr0289952	Others	Others	Others	Others	Others	Others	Others	Others	Others	Others	NA	-2.04315	0.00135116	Others
FBgn0265822	lncRNA:CR44611	19834719	Promoter (2-3kb)	2998	chr2L	7076072	7076401	330	195.099	3.66436	165	1	7078895	7079399	505	2	FBtr0342659	Others	Others	Others	Others	Others	Others	Others	Others	Others	Others	NA	NA	NA	Others
FBgn0085407	Pvf3	33995	Intron (FBtr0112612/FBgn0085407, intron 1 of 5)	9509	chr2L	7123751	7124018	268	1201.48	4.10745	153	1	7098188	7133527	35340	2	FBtr0112612	Others	Others	Others	Others	Others	Others	Others	Others	Others	Others	NA	1.71096	6.36e-10	Others
FBgn0085407	Pvf3	33995	Promoter (1-2kb)	-1077	chr2L	7135146	7135364	219	440.795	4.10745	113	1	7099692	7134069	34378	2	FBtr0301525	Others	Others	Others	Others	Others	Others	Others	Others	Others	Others	NA	1.71096	6.36e-10	Others
FBgn0265823	lncRNA:CR44612	19836012	Promoter (1-2kb)	1878	chr2L	7144182	7144336	155	250.447	4.10745	69	1	7142304	7145263	2960	1	FBtr0342653	Others	Others	Others	Others	Others	Others	Others	Others	Others	Others	NA	NA	NA	Others
FBgn0265823	lncRNA:CR44612	19836012	Intron (FBtr0342658/FBgn0085407, intron 1 of 4)	5836	chr2L	7148140	7148453	314	817.187	4.10745	157	1	7142304	7145263	2960	1	FBtr0342653	Others	Others	Others	Others	Others	Others	Others	Others	Others	Others	NA	NA	NA	Others
FBgn0265823	lncRNA:CR44612	19836012	Intron (FBtr0342658/FBgn0085407, intron 1 of 4)	6714	chr2L	7149018	7149200	183	377.243	4.10745	106	1	7142304	7145263	2960	1	FBtr0342653	Others	Others	Others	Others	Others	Others	Others	Others	Others	Others	NA	NA	NA	Others
FBgn0085407	Pvf3	33995	Promoter (2-3kb)	2498	chr2L	7154987	7155197	211	557.262	4.10745	107	1	7098188	7157695	59508	2	FBtr0342658	Others	Others	Others	Others	Others	Others	Others	Others	Others	Others	NA	1.71096	6.36e-10	Others
FBgn0085407	Pvf3	33995	Distal Intergenic	-8122	chr2L	7165817	7166146	330	168.806	3.34627	165	1	7099692	7157695	58004	2	FBtr0112611	Others	Others	Others	Others	Others	Others	Others	Others	Others	Others	NA	1.71096	6.36e-10	Others
FBgn0031894	CG4496	34000	Promoter (<=1kb)	-396	chr2L	7188464	7188775	312	1316.12	4.10745	141	1	7185480	7188068	2589	2	FBtr0342654	Others	Others	Others	Others	Others	Others	Others	Others	Others	Others	Others	-0.573238	0.581897	Others
FBgn0031895	CG4497	34001	Promoter (<=1kb)	0	chr2L	7194394	7194718	325	1426.64	4.10745	175	1	7190431	7194413	3983	2	FBtr0079418	Others	Others	Others	Others	Others	Others	Others	Others	Others	Others	NA	0.332483	0.200568	Others
FBgn0031896	CG4502	34002	Promoter (<=1kb)	0	chr2L	7204208	7204447	240	664.133	4.10745	108	1	7194908	7204264	9357	2	FBtr0079416	Others	Others	Others	Others	Others	Others	Others	Others	Others	Others	NA	0.461982	0.0294366	Others
FBgn0031897	CG13784	34003	Intron (FBtr0330197/FBgn0031897, intron 1 of 5)	4013	chr2L	7215691	7216020	330	227.356	4.10745	165	1	7204538	7220033	15496	2	FBtr0330197	Others	Others	Others	Others	Others	Others	Others	Others	Others	Others	NA	-0.216916	0.00744986	Others
FBgn0031897	CG13784	34003	Promoter (<=1kb)	627	chr2L	7219077	7219406	330	141.477	2.36351	165	1	7204538	7220033	15496	2	FBtr0330197	Others	Others	Others	Others	Others	Others	Others	Others	Others	Others	NA	-0.216916	0.00744986	Others
FBgn0031897	CG13784	34003	Promoter (<=1kb)	0	chr2L	7220011	7220237	227	677.379	4.10745	93	1	7204538	7220033	15496	2	FBtr0330197	Others	Others	Others	Others	Others	Others	Others	Others	Others	Others	NA	-0.216916	0.00744986	Others
FBgn0051909	CG31909	319020	Promoter (<=1kb)	718	chr2L	7258230	7258373	144	325.711	4.10745	82	1	7257512	7258198	687	1	FBtr0300460	Others	Others	Others	Others	Others	Others	Others	Others	Others	Others	NA	1.03148	0.680979	Others
FBgn0051909	CG31909	319020	Intron (FBtr0089291/FBgn0010453, intron 1 of 3)	4534	chr2L	7262046	7262278	233	697.184	4.10745	118	1	7257512	7258198	687	1	FBtr0300460	Others	Others	Others	Others	Others	Others	Others	Others	Others	Others	NA	1.03148	0.680979	Others
FBgn0051909	CG31909	319020	Intron (FBtr0089291/FBgn0010453, intron 1 of 3)	5515	chr2L	7263027	7263152	126	230.562	4.10745	51	1	7257512	7258198	687	1	FBtr0300460	Others	Others	Others	Others	Others	Others	Others	Others	Others	Others	NA	1.03148	0.680979	Others
FBgn0051909	CG31909	319020	Intron (FBtr0089291/FBgn0010453, intron 1 of 3)	8546	chr2L	7266058	7266237	180	279.863	4.10745	70	1	7257512	7258198	687	1	FBtr0300460	Others	Others	Others	Others	Others	Others	Others	Others	Others	Others	NA	1.03148	0.680979	Others
FBgn0010453	Wnt4	34007	Intron (FBtr0089291/FBgn0010453, intron 1 of 3)	6610	chr2L	7270397	7270561	165	316.268	4.10745	86	1	7255419	7277171	21753	2	FBtr0089291	Others	Others	Others	Others	Others	Others	Others	Others	Others	Others	NA	0.707776	0.00045476	Others
FBgn0010453	Wnt4	34007	Distal Intergenic	-4364	chr2L	7281535	7281741	207	430.74	4.10745	92	1	7255848	7277171	21324	2	FBtr0334799	Others	Others	Others	Others	Others	Others	Others	Others	Others	Others	NA	0.707776	0.00045476	Others
FBgn0010453	Wnt4	34007	Distal Intergenic	-14883	chr2L	7292054	7292239	186	285.851	4.10745	59	1	7255848	7277171	21324	2	FBtr0334799	Others	Others	Others	Others	Others	Others	Others	Others	Others	Others	NA	0.707776	0.00045476	Others
FBgn0284084	wg	34009	Distal Intergenic	-13470	chr2L	7293589	7293689	101	221.204	4.10745	29	1	7307159	7316265	9107	1	FBtr0079432	Others	Others	Others	Others	Others	Others	Others	Others	Others	Others	NA	0.447898	0.0242266	Others
FBgn0284084	wg	34009	Distal Intergenic	-11867	chr2L	7295063	7295292	230	616.562	4.10745	127	1	7307159	7316265	9107	1	FBtr0079432	Others	Others	Others	Others	Others	Others	Others	Others	Others	Others	NA	0.447898	0.0242266	Others
FBgn0284084	wg	34009	Distal Intergenic	-10939	chr2L	7295969	7296220	252	500.327	4.10745	124	1	7307159	7316265	9107	1	FBtr0079432	Others	Others	Others	Others	Others	Others	Others	Others	Others	Others	NA	0.447898	0.0242266	Others
FBgn0284084	wg	34009	Distal Intergenic	-8135	chr2L	7298836	7299024	189	289.52	4.10745	107	1	7307159	7316265	9107	1	FBtr0079432	Others	Others	Others	Others	Others	Others	Others	Others	Others	Others	NA	0.447898	0.0242266	Others
FBgn0284084	wg	34009	Promoter (<=1kb)	-74	chr2L	7306756	7307085	330	154.562	2.82439	165	1	7307159	7316265	9107	1	FBtr0079432	Others	Others	Others	Others	Others	Others	Others	Others	Others	Others	NA	0.447898	0.0242266	Others
FBgn0284084	wg	34009	Intron (FBtr0079432/FBgn0284084, intron 3 of 4)	6406	chr2L	7313565	7313733	169	332.69	4.10745	95	1	7307159	7316265	9107	1	FBtr0079432	Others	Others	Others	Others	Others	Others	Others	Others	Others	Others	NA	0.447898	0.0242266	Others
FBgn0284084	wg	34009	Distal Intergenic	10251	chr2L	7317410	7317545	136	244.711	4.10745	68	1	7307159	7316265	9107	1	FBtr0079432	Others	Others	Others	Others	Others	Others	Others	Others	Others	Others	NA	0.447898	0.0242266	Others
FBgn0031902	Wnt6	34010	Promoter (<=1kb)	-632	chr2L	7332861	7333082	222	226.893	4.10745	34	1	7333714	7352524	18811	1	FBtr0334800	Others	Others	Others	Others	Others	Others	Others	Others	Others	Others	NA	0.0622534	0.853105	Others
FBgn0031902	Wnt6	34010	Intron (FBtr0334800/FBgn0031902, intron 1 of 3)	6043	chr2L	7339757	7339870	114	222.572	4.10745	33	1	7333714	7352542	18829	1	FBtr0303251	Others	Others	Others	Others	Others	Others	Others	Others	Others	Others	NA	0.0622534	0.853105	Others
FBgn0031903	Wnt10	34011	Distal Intergenic	-5127	chr2L	7358142	7358252	111	177.562	3.69656	38	1	7363379	7377528	14150	1	FBtr0303207	Others	Others	Others	Others	Others	Others	Others	Others	Others	Others	NA	0.099889	0.92758	Others
FBgn0031904	CG5149	34013	Promoter (<=1kb)	0	chr2L	7388196	7388382	187	558.036	4.10745	85	1	7384486	7388253	3768	2	FBtr0079469	Others	Others	Others	Others	Others	Others	Others	Others	Others	Others	NA	0.0928943	0.484897	Others
FBgn0031906	CG5160	34015	Promoter (1-2kb)	-1445	chr2L	7397046	7397256	211	479.73	4.10745	108	1	7390984	7395601	4618	2	FBtr0302588	Others	Others	Others	Others	Others	Others	Others	Others	Others	Others	NA	2.66469	6.74e-26	Others
FBgn0031907	CG5171	34016	Promoter (<=1kb)	419	chr2L	7401754	7401905	152	221.473	4.10745	133	1	7401335	7404526	3192	1	FBtr0302587	Others	Others	Others	Others	Others	Others	Others	Others	Others	Others	NA	-0.285059	0.113668	Others
FBgn0028387	chm	43928	Promoter (<=1kb)	0	chr2L	7412279	7412456	178	448.744	4.10745	92	1	7412417	7417813	5397	1	FBtr0308610	Others	Others	Others	Others	Others	Others	Others	Others	Others	Others	NA	-0.0987074	0.573686	Others
FBgn0264439	lncRNA:CR43857	14462718	Promoter (2-3kb)	-2914	chr2L	7420735	7420906	172	342.471	4.10745	59	1	7423820	7425932	2113	1	FBtr0332524	Others	Others	Others	Others	Others	Others	Others	Others	Others	Others	NA	NA	NA	Others
FBgn0264439	lncRNA:CR43857	14462718	Promoter (<=1kb)	-138	chr2L	7423596	7423682	87	229.796	4.10745	20	1	7423820	7425932	2113	1	FBtr0332524	Others	Others	Others	Others	Others	Others	Others	Others	Others	Others	NA	NA	NA	Others
FBgn0262453	mir-275	12798299	Promoter (<=1kb)	-296	chr2L	7425170	7425499	330	185.12	3.68163	165	1	7425795	7425892	98	1	FBtr0304472	Others	Others	Others	Others	Others	Others	Others	Others	Others	Others	NA	NA	NA	Others
FBgn0283658	muc	34021	Promoter (<=1kb)	-150	chr2L	7426493	7426716	224	482.664	4.10745	110	1	7426866	7430329	3464	1	FBtr0079444	Mitochondria	Others	Others	Others	Others	Others	Others	Others	Others	Others	NA	-1.72455	1.41e-286	MitoOthers
FBgn0031913	CG5958	34022	Promoter (<=1kb)	-600	chr2L	7434116	7434307	192	299.81	4.10745	120	1	7430530	7433516	2987	2	FBtr0079466	Others	Others	Others	Others	Others	Others	Others	Others	Others	Others	NA	-1.74186	7.2e-215	Others
FBgn0031914	CG5973	34023	Promoter (<=1kb)	-421	chr2L	7436877	7437071	195	444.911	4.10745	102	1	7437492	7445269	7778	1	FBtr0079446	Others	Others	Others	Others	Others	Others	Others	Others	Others	Others	NA	0.889896	2.34e-21	Others
FBgn0260486	Ziz	34030	Promoter (1-2kb)	1779	chr2L	7494368	7494528	161	207.308	3.64197	67	1	7472513	7496307	23795	2	FBtr0330721	Others	Others	Others	Others	Others	Others	Others	Others	Others	Others	NA	1.24412	6.02e-21	Others
FBgn0260486	Ziz	34030	Promoter (1-2kb)	1508	chr2L	7494470	7494799	330	149.976	2.56006	165	1	7472513	7496307	23795	2	FBtr0330721	Others	Others	Others	Others	Others	Others	Others	Others	Others	Others	NA	1.24412	6.02e-21	Others
FBgn0260486	Ziz	34030	Promoter (<=1kb)	0	chr2L	7496304	7496543	240	832.897	4.10745	110	1	7472513	7496307	23795	2	FBtr0330721	Others	Others	Others	Others	Others	Others	Others	Others	Others	Others	NA	1.24412	6.02e-21	Others
FBgn0264891	lncRNA:CR44082	14462719	Intron (FBtr0334847/FBgn0264895, intron 1 of 3)	-6554	chr2L	7512910	7513125	216	610.364	4.10745	128	1	7519679	7520082	404	1	FBtr0334845	Others	Others	Others	Others	Others	Others	Others	Others	Others	Others	NA	NA	NA	Others
FBgn0264891	lncRNA:CR44082	14462719	Promoter (<=1kb)	-521	chr2L	7519067	7519158	92	241.516	4.10745	39	1	7519679	7520082	404	1	FBtr0334845	Others	Others	Others	Others	Others	Others	Others	Others	Others	Others	NA	NA	NA	Others
FBgn0264891	lncRNA:CR44082	14462719	Intron (FBtr0334847/FBgn0264895, intron 1 of 3)	3173	chr2L	7522852	7523181	330	197.211	3.66102	165	1	7519679	7520082	404	1	FBtr0334845	Others	Others	Others	Others	Others	Others	Others	Others	Others	Others	NA	NA	NA	Others
FBgn0264895	RapGAP1	34032	Promoter (2-3kb)	2119	chr2L	7528126	7528455	330	154.886	2.82345	165	1	7497805	7530574	32770	2	FBtr0334847	Others	Others	Others	Others	Others	Others	Others	Others	Others	Others	NA	-0.0200521	0.861288	Others
FBgn0264895	RapGAP1	34032	Promoter (<=1kb)	-25	chr2L	7530599	7530783	185	340.458	4.10745	87	1	7497805	7530574	32770	2	FBtr0334847	Others	Others	Others	Others	Others	Others	Others	Others	Others	Others	NA	-0.0200521	0.861288	Others
FBgn0264895	RapGAP1	34032	Promoter (2-3kb)	-2159	chr2L	7532733	7532947	215	457.809	4.10745	117	1	7497805	7530574	32770	2	FBtr0334847	Others	Others	Others	Others	Others	Others	Others	Others	Others	Others	NA	-0.0200521	0.861288	Others
FBgn0264895	RapGAP1	34032	Intron (FBtr0334848/FBgn0264895, intron 2 of 4)	-4408	chr2L	7534982	7535240	259	890.174	4.10745	134	1	7497805	7530574	32770	2	FBtr0334847	Others	Others	Others	Others	Others	Others	Others	Others	Others	Others	NA	-0.0200521	0.861288	Others
FBgn0264895	RapGAP1	34032	Promoter (2-3kb)	2798	chr2L	7541501	7541629	129	159.512	2.93191	67	1	7497805	7544427	46623	2	FBtr0334848	Others	Others	Others	Others	Others	Others	Others	Others	Others	Others	NA	-0.0200521	0.861288	Others
FBgn0264895	RapGAP1	34032	Promoter (<=1kb)	-132	chr2L	7544559	7544659	101	209.127	3.63806	21	1	7497805	7544427	46623	2	FBtr0334848	Others	Others	Others	Others	Others	Others	Others	Others	Others	Others	NA	-0.0200521	0.861288	Others
FBgn0264895	RapGAP1	34032	Promoter (2-3kb)	-2839	chr2L	7547266	7547347	82	190.063	3.67139	37	1	7497805	7544427	46623	2	FBtr0334848	Others	Others	Others	Others	Others	Others	Others	Others	Others	Others	NA	-0.0200521	0.861288	Others
FBgn0267732	lncRNA:CR46063	26067380	Promoter (2-3kb)	-2787	chr2L	7564965	7565142	178	263.319	4.10745	100	1	7567929	7568438	510	1	FBtr0347292	Others	Others	Others	Others	Others	Others	Others	Others	Others	Others	NA	NA	NA	Others
FBgn0267732	lncRNA:CR46063	26067380	Promoter (1-2kb)	-1040	chr2L	7566768	7566889	122	155.095	2.82314	79	1	7567929	7568438	510	1	FBtr0347292	Others	Others	Others	Others	Others	Others	Others	Others	Others	Others	NA	NA	NA	Others
FBgn0264895	RapGAP1	34032	Promoter (<=1kb)	-355	chr2L	7576962	7577265	304	569.948	4.10745	139	1	7497805	7576607	78803	2	FBtr0334846	Others	Others	Others	Others	Others	Others	Others	Others	Others	Others	NA	-0.0200521	0.861288	Others
FBgn0264895	RapGAP1	34032	Promoter (<=1kb)	966	chr2L	7577685	7578014	330	141.369	2.36371	165	1	7497805	7578980	81176	2	FBtr0334849	Others	Others	Others	Others	Others	Others	Others	Others	Others	Others	NA	-0.0200521	0.861288	Others
FBgn0266910	lncRNA:CR45370	19835073	Distal Intergenic	-7041	chr2L	7596938	7597202	265	1078.26	4.10745	138	1	7604243	7604563	321	1	FBtr0345778	Others	Others	Others	Others	Others	Others	Others	Others	Others	Others	NA	NA	NA	Others
FBgn0031926	CG6739	34037	Distal Intergenic	8577	chr2L	7616966	7617113	148	251.253	4.10745	68	1	7608389	7616533	8145	1	FBtr0335486	Others	Others	Others	Others	Others	Others	Others	Others	Others	Others	NA	-0.707891	3.19e-11	Others
FBgn0031926	CG6739	34037	Distal Intergenic	10864	chr2L	7619253	7619582	330	161.461	3.03017	165	1	7608389	7616533	8145	1	FBtr0335486	Others	Others	Others	Others	Others	Others	Others	Others	Others	Others	NA	-0.707891	3.19e-11	Others
FBgn0266034	lncRNA:CR44799	19835166	Distal Intergenic	-7361	chr2L	7628423	7628752	330	215.27	4.10745	165	1	7636113	7636608	496	1	FBtr0343251	Others	Others	Others	Others	Others	Others	Others	Others	Others	Others	NA	NA	NA	Others
FBgn0266034	lncRNA:CR44799	19835166	Distal Intergenic	-3061	chr2L	7632861	7633052	192	441.002	4.10745	102	1	7636113	7636608	496	1	FBtr0343251	Others	Others	Others	Others	Others	Others	Others	Others	Others	Others	NA	NA	NA	Others
FBgn0266034	lncRNA:CR44799	19835166	Promoter (<=1kb)	-652	chr2L	7635283	7635461	179	314.686	4.10745	90	1	7636113	7636608	496	1	FBtr0343251	Others	Others	Others	Others	Others	Others	Others	Others	Others	Others	NA	NA	NA	Others
FBgn0266035	lncRNA:CR44800	19835768	Distal Intergenic	4742	chr2L	7641693	7641971	279	1069.98	4.10745	136	1	7636951	7637324	374	1	FBtr0343252	Others	Others	Others	Others	Others	Others	Others	Others	Others	Others	NA	NA	NA	Others
FBgn0031947	CG7154	34062	Promoter (<=1kb)	240	chr2L	7783105	7783298	194	627.553	4.10745	119	1	7782865	7786061	3197	1	FBtr0079488	Others	Others	Others	Others	Others	Others	Others	Others	Others	Others	NA	-0.396872	0.00497176	Others
FBgn0031950	Herp	34065	Promoter (<=1kb)	0	chr2L	7799809	7800139	331	937.091	4.10745	174	1	7796314	7800058	3745	2	FBtr0343403	Others	Others	Others	Others	Others	Others	Others	Others	Others	Others	NA	0.339275	6.04e-07	Others
FBgn0031952	cdc14	34067	Promoter (<=1kb)	0	chr2L	7810579	7810908	330	245.266	4.10745	165	1	7801668	7810703	9036	2	FBtr0343423	Others	Others	Others	Others	Others	Others	Others	Others	Others	Others	NA	0.444378	0.000966652	Others
FBgn0261800	LanB1	34068	Promoter (<=1kb)	0	chr2L	7811294	7811623	330	238.965	4.10745	165	1	7811438	7820771	9334	1	FBtr0079490	Others	Others	Others	Others	Others	Others	Others	Others	Others	Others	NA	-1.50901	3.29e-129	Others
FBgn0261800	LanB1	34068	Promoter (<=1kb)	-730	chr2L	7813540	7813624	85	233.138	4.10745	39	1	7814354	7820771	6418	1	FBtr0079491	Others	Others	Others	Others	Others	Others	Others	Others	Others	Others	NA	-1.50901	3.29e-129	Others
FBgn0020618	Rack1	34070	Promoter (<=1kb)	0	chr2L	7827109	7827388	280	661.777	4.10745	128	1	7825347	7827246	1900	2	FBtr0331238	Others	Others	Others	Others	Others	Others	Others	Others	Others	Others	NA	-0.138785	0.00719942	Others
FBgn0004177	mts	45959	Promoter (<=1kb)	0	chr2L	7827618	7827846	229	709.909	4.10745	130	1	7827650	7833576	5927	1	FBtr0343416	Others	Others	Others	Others	Others	Others	Others	Others	Others	Others	NA	-0.181506	1.94e-06	Others
FBgn0004177	mts	45959	Promoter (<=1kb)	452	chr2L	7828245	7828574	330	176.917	3.69755	165	1	7827793	7832668	4876	1	FBtr0079525	Others	Others	Others	Others	Others	Others	Others	Others	Others	Others	NA	-0.181506	1.94e-06	Others
FBgn0004177	mts	45959	Promoter (1-2kb)	1020	chr2L	7828813	7829142	330	206.479	3.64349	165	1	7827793	7832668	4876	1	FBtr0079525	Others	Others	Others	Others	Others	Others	Others	Others	Others	Others	NA	-0.181506	1.94e-06	Others
FBgn0031955	CG14535	34073	Intron (FBtr0079564/FBgn0031955, intron 2 of 6)	3349	chr2L	7851767	7851906	140	199.603	3.65619	79	1	7844905	7855255	10351	2	FBtr0079564	Others	Others	Others	Others	Others	Others	Others	Others	Others	Others	NA	1.93677	1.84e-15	Others
FBgn0040099	lectin-28C	53542	Promoter (<=1kb)	-422	chr2L	7856492	7856655	164	297.947	4.10745	95	1	7857077	7858136	1060	1	FBtr0308065	Others	Others	Others	Others	Others	Others	Others	Others	Others	Others	NA	0.424784	0.695281	Others
FBgn0083968	CG34132	4379884	Promoter (<=1kb)	0	chr2L	7885419	7885524	106	291.684	4.10745	72	1	7885503	7886109	607	1	FBtr0110879	Mitochondria	Others	Others	Others	Others	Others	Others	Protein_import_insertion_mito	Others	Others	NA	-1.6684	8.85e-44	Mito_EBR
FBgn0083968	CG34132	4379884	Promoter (<=1kb)	479	chr2L	7885982	7886311	330	181.635	3.68857	165	1	7885503	7886109	607	1	FBtr0110879	Mitochondria	Others	Others	Others	Others	Others	Others	Protein_import_insertion_mito	Others	Others	NA	-1.6684	8.85e-44	Mito_EBR
FBgn0053121	Spn28Db	326261	Promoter (<=1kb)	-31	chr2L	7890735	7891064	330	321.974	4.10745	165	1	7889288	7890704	1417	2	FBtr0473606	Others	Others	Others	Others	Others	Others	Others	Others	Others	Others	NA	NA	NA	Others
FBgn0053121	Spn28Db	326261	Intron (FBtr0112718/FBgn0085450, intron 2 of 2)	-25695	chr2L	7916399	7916636	238	877.89	4.10745	127	1	7889288	7890704	1417	2	FBtr0473606	Others	Others	Others	Others	Others	Others	Others	Others	Others	Others	NA	NA	NA	Others
FBgn0053121	Spn28Db	326261	Intron (FBtr0112718/FBgn0085450, intron 2 of 2)	-28202	chr2L	7918906	7918996	91	148.302	2.48013	31	1	7889288	7890704	1417	2	FBtr0473606	Others	Others	Others	Others	Others	Others	Others	Others	Others	Others	NA	NA	NA	Others
FBgn0053121	Spn28Db	326261	Intron (FBtr0112718/FBgn0085450, intron 2 of 2)	-34759	chr2L	7925463	7925699	237	803.237	4.10745	116	1	7889288	7890704	1417	2	FBtr0473606	Others	Others	Others	Others	Others	Others	Others	Others	Others	Others	NA	NA	NA	Others
FBgn0053121	Spn28Db	326261	Intron (FBtr0112718/FBgn0085450, intron 2 of 2)	-41748	chr2L	7932452	7932603	152	209.002	3.63859	83	1	7889288	7890704	1417	2	FBtr0473606	Others	Others	Others	Others	Others	Others	Others	Others	Others	Others	NA	NA	NA	Others
FBgn0085450	Snoo	5740414	Intron (FBtr0112718/FBgn0085450, intron 2 of 2)	36014	chr2L	7940722	7941051	330	164.519	3.15779	165	1	7893431	7977065	83635	2	FBtr0112717	Others	Others	Others	Others	Others	Others	Others	Others	Others	Others	Others	0.958468	2.48e-13	Others
FBgn0085450	Snoo	5740414	Intron (FBtr0112718/FBgn0085450, intron 2 of 2)	12169	chr2L	7964670	7964896	227	929.96	4.10745	122	1	7893431	7977065	83635	2	FBtr0112717	Others	Others	Others	Others	Others	Others	Others	Others	Others	Others	Others	0.958468	2.48e-13	Others
FBgn0085450	Snoo	5740414	Promoter (<=1kb)	-10	chr2L	7984206	7984313	108	308.736	4.10745	37	1	7892325	7984196	91872	2	FBtr0112719	Others	Others	Others	Others	Others	Others	Others	Others	Others	Others	Others	0.958468	2.48e-13	Others
FBgn0031968	CG7231	34086	Promoter (<=1kb)	-30	chr2L	7984916	7985245	330	167.586	3.23952	165	1	7985275	7986785	1511	1	FBtr0300184	Others	Others	Others	Others	Others	Others	Others	Others	Others	Others	NA	-0.0242186	0.867799	Others
FBgn0031969	pes	34087	Promoter (<=1kb)	-481	chr2L	7992061	7992214	154	335.419	4.10745	90	1	7990964	7991580	617	2	FBtr0331673	Others	Others	Others	Others	Others	Others	Others	Others	Others	Others	NA	1.34251	1.17e-83	Others
FBgn0031969	pes	34087	Promoter (<=1kb)	-64	chr2L	7994248	7994437	190	283.681	4.10745	52	1	7987113	7994184	7072	2	FBtr0114550	Others	Others	Others	Others	Others	Others	Others	Others	Others	Others	NA	1.34251	1.17e-83	Others
FBgn0266331	asRNA:CR44996	19835095	Promoter (<=1kb)	0	chr2L	7994716	7994837	122	211.948	3.6329	67	1	7994798	7996494	1697	1	FBtr0344062	Others	Others	Others	Others	Others	Others	Others	Others	Others	Others	NA	NA	NA	Others
FBgn0031971	Sirup	34089	Promoter (<=1kb)	0	chr2L	7998733	7998939	207	376.578	4.10745	128	1	7998869	7999676	808	1	FBtr0343382	Mitochondria	Others	Others	Others	Others	Others	Others	Others	Others	Others	NA	2.44316	1.59e-280	MitoOthers
FBgn0031972	Wwox	34090	Promoter (2-3kb)	2410	chr2L	8001726	8001876	151	424.802	4.10745	88	1	7999670	8004286	4617	2	FBtr0079550	Others	Others	Others	Others	Others	Others	Others	Others	Others	Others	NA	0.572006	0.000331818	Others
FBgn0031972	Wwox	34090	Promoter (2-3kb)	2249	chr2L	8001947	8002037	91	262.933	4.10745	68	1	7999670	8004286	4617	2	FBtr0079550	Others	Others	Others	Others	Others	Others	Others	Others	Others	Others	NA	0.572006	0.000331818	Others
FBgn0044323	Cka	34096	Promoter (<=1kb)	0	chr2L	8030795	8031124	330	158.288	2.93495	165	1	8031010	8038498	7489	1	FBtr0079539	Others	Others	Others	Others	Others	Others	Others	Others	Others	Others	NA	0.393607	1.34e-07	Others
FBgn0044323	Cka	34096	Promoter (<=1kb)	524	chr2L	8031534	8031863	330	140.385	2.34454	165	1	8031010	8040826	9817	1	FBtr0306001	Others	Others	Others	Others	Others	Others	Others	Others	Others	Others	NA	0.393607	1.34e-07	Others
FBgn0044323	Cka	34096	Intron (FBtr0306000/FBgn0044323, intron 2 of 5)	3782	chr2L	8034792	8035026	235	497.495	4.10745	106	1	8031010	8040826	9817	1	FBtr0306001	Others	Others	Others	Others	Others	Others	Others	Others	Others	Others	NA	0.393607	1.34e-07	Others
FBgn0031979	CCDC53	34097	Promoter (<=1kb)	0	chr2L	8040890	8041219	330	169.596	3.34459	165	1	8041106	8041879	774	1	FBtr0079540	Others	Others	Others	Others	Others	Others	Others	Others	Others	Others	NA	-0.254391	0.522875	Others
FBgn0031980	RpL36A	34098	Promoter (<=1kb)	0	chr2L	8042781	8043049	269	675.794	4.10745	77	1	8041873	8042909	1037	2	FBtr0345332	Others	Others	Others	Others	Others	Others	Others	Others	Others	Others	NA	-0.471416	3.48e-11	Others
FBgn0266795	asRNA:CR45257	19835516	Promoter (1-2kb)	-1817	chr2L	8080713	8081042	330	200.565	3.65504	165	1	8082859	8083107	249	1	FBtr0345451	Others	Others	Others	Others	Others	Others	Others	Others	Others	Others	NA	NA	NA	Others
FBgn0266795	asRNA:CR45257	19835516	Promoter (<=1kb)	-513	chr2L	8082017	8082346	330	170.21	3.3429	165	1	8082859	8083107	249	1	FBtr0345451	Others	Others	Others	Others	Others	Others	Others	Others	Others	Others	NA	NA	NA	Others
FBgn0261822	Bsg	318841	Promoter (<=1kb)	0	chr2L	8083279	8083423	145	161.998	3.02876	69	1	8083420	8109458	26039	1	FBtr0079566	Others	Others	Others	Others	Others	Others	Others	Others	Others	Others	NA	-0.206294	0.000532335	Others
FBgn0261822	Bsg	318841	Promoter (<=1kb)	258	chr2L	8083678	8084007	330	168.376	3.347	165	1	8083420	8116531	33112	1	FBtr0079568	Others	Others	Others	Others	Others	Others	Others	Others	Others	Others	NA	-0.206294	0.000532335	Others
FBgn0261822	Bsg	318841	Promoter (1-2kb)	1341	chr2L	8084761	8085090	330	153.519	2.76278	165	1	8083420	8116531	33112	1	FBtr0079568	Others	Others	Others	Others	Others	Others	Others	Others	Others	Others	NA	-0.206294	0.000532335	Others
FBgn0261822	Bsg	318841	Promoter (<=1kb)	0	chr2L	8088015	8088344	330	212.516	3.63168	165	1	8088304	8109458	21155	1	FBtr0079570	Others	Others	Others	Others	Others	Others	Others	Others	Others	Others	NA	-0.206294	0.000532335	Others
FBgn0261822	Bsg	318841	Intron (FBtr0079566/FBgn0261822, intron 2 of 6)	8459	chr2L	8097562	8097714	153	351.902	4.10745	79	1	8089103	8109458	20356	1	FBtr0079573	Others	Others	Others	Others	Others	Others	Others	Others	Others	Others	NA	-0.206294	0.000532335	Others
FBgn0031988	CG8668	34107	3' UTR	6992	chr2L	8133993	8134343	351	3102.53	4.10745	170	1	8127001	8133989	6989	1	FBtr0339671	Others	Others	Others	Others	Others	Others	Others	Others	Others	Others	NA	-0.304413	0.00457772	Others
FBgn0031990	PAPLA1	34109	Promoter (<=1kb)	-21	chr2L	8156771	8157040	270	533.528	4.10745	166	1	8134247	8156750	22504	2	FBtr0302595	Others	Others	Others	Others	Others	Others	Others	Others	Others	Others	NA	-0.205663	0.0276411	Others
FBgn0031990	PAPLA1	34109	Promoter (<=1kb)	0	chr2L	8159571	8159878	308	1433.23	4.10745	152	1	8134247	8159575	25329	2	FBtr0079641	Others	Others	Others	Others	Others	Others	Others	Others	Others	Others	NA	-0.205663	0.0276411	Others
FBgn0264953	Piezo	34112	Promoter (<=1kb)	-26	chr2L	8162712	8163047	336	1410.93	4.10745	137	1	8163073	8190137	27065	1	FBtr0335175	Others	Others	Others	Others	Others	Others	Others	Others	Others	Others	NA	0.126251	0.185539	Others
FBgn0264953	Piezo	34112	Promoter (1-2kb)	1242	chr2L	8164315	8164568	254	834.004	4.10745	143	1	8163073	8190137	27065	1	FBtr0347415	Others	Others	Others	Others	Others	Others	Others	Others	Others	Others	NA	0.126251	0.185539	Others
FBgn0264953	Piezo	34112	Promoter (2-3kb)	2845	chr2L	8165918	8166023	106	183.529	3.68458	74	1	8163073	8190137	27065	1	FBtr0347415	Others	Others	Others	Others	Others	Others	Others	Others	Others	Others	NA	0.126251	0.185539	Others
FBgn0031998	SLC5A11	34117	Promoter (<=1kb)	-13	chr2L	8205145	8205401	257	715.519	4.10745	87	1	8200465	8205132	4668	2	FBtr0079637	Others	Others	Others	Others	Others	Others	Others	Others	Others	Others	NA	-0.00522217	0.957259	Others
FBgn0015299	Ssb-c31a	34120	Promoter (<=1kb)	-25	chr2L	8211185	8211322	138	343.491	4.10745	97	1	8211347	8211938	592	1	FBtr0079590	Others	Others	Others	Others	Others	Others	Others	Others	Others	Others	NA	-0.965994	4.07e-12	Others
FBgn0032000	CG8372	34121	Promoter (<=1kb)	0	chr2L	8212853	8213168	316	2189.83	4.10745	160	1	8212039	8212902	864	2	FBtr0079633	Others	Others	Others	Others	Others	Others	Others	Others	Others	Others	NA	-0.152989	0.157868	Others
FBgn0032006	Pvr	34127	Promoter (<=1kb)	801	chr2L	8229721	8229876	156	167.346	3.23997	104	1	8221127	8230677	9551	2	FBtr0303109	Others	Others	Others	Others	Others	Others	Others	Others	Others	Others	NA	0.249095	0.0194764	Others
FBgn0032006	Pvr	34127	Promoter (1-2kb)	-1860	chr2L	8232537	8232683	147	224.761	4.10745	68	1	8221127	8230677	9551	2	FBtr0303109	Others	Others	Others	Others	Others	Others	Others	Others	Others	Others	NA	0.249095	0.0194764	Others
FBgn0003502	Btk29A	34132	Promoter (1-2kb)	1191	chr2L	8276415	8276511	97	244.129	4.10745	53	1	8258755	8277702	18948	2	FBtr0079618	Others	Others	Others	Others	Others	Others	Others	Others	Others	Others	NA	0.617715	6.28e-14	Others
FBgn0003502	Btk29A	34132	Promoter (<=1kb)	-19	chr2L	8277721	8277992	272	608.413	4.10745	102	1	8259505	8277702	18198	2	FBtr0079615	Others	Others	Others	Others	Others	Others	Others	Others	Others	Others	NA	0.617715	6.28e-14	Others
FBgn0003502	Btk29A	34132	Promoter (2-3kb)	-2039	chr2L	8279741	8279991	251	594.747	4.10745	148	1	8259505	8277702	18198	2	FBtr0079615	Others	Others	Others	Others	Others	Others	Others	Others	Others	Others	NA	0.617715	6.28e-14	Others
FBgn0011902	tRNA:Lys-TTT-1-1	3772008	Intron (FBtr0112836/FBgn0003502, intron 2 of 12)	-5571	chr2L	8285051	8285156	106	189.534	3.67305	35	1	8290727	8290799	73	1	FBtr0079596	Others	Others	Others	Others	Others	Others	Others	Others	Others	Others	NA	NA	NA	Others
FBgn0011902	tRNA:Lys-TTT-1-1	3772008	Promoter (<=1kb)	-658	chr2L	8289740	8290069	330	169.566	3.3447	165	1	8290727	8290799	73	1	FBtr0079596	Others	Others	Others	Others	Others	Others	Others	Others	Others	Others	NA	NA	NA	Others
FBgn0011902	tRNA:Lys-TTT-1-1	3772008	Promoter (1-2kb)	1756	chr2L	8292483	8292764	282	1153.04	4.10745	134	1	8290727	8290799	73	1	FBtr0079596	Others	Others	Others	Others	Others	Others	Others	Others	Others	Others	NA	NA	NA	Others
FBgn0003502	Btk29A	34132	Promoter (<=1kb)	0	chr2L	8301035	8301168	134	241.811	4.10745	24	1	8259505	8301079	41575	2	FBtr0079617	Others	Others	Others	Others	Others	Others	Others	Others	Others	Others	NA	0.617715	6.28e-14	Others
FBgn0261020	wol	34134	Promoter (<=1kb)	0	chr2L	8302823	8303152	330	220.225	4.10745	165	1	8301345	8302985	1641	2	FBtr0079614	Others	Others	Others	Others	Others	Others	Others	Others	Others	Others	NA	-1.06214	1.34e-36	Others
FBgn0032015	Ostgamma	34137	Promoter (<=1kb)	0	chr2L	8308023	8308352	330	153.898	2.76159	165	1	8306696	8308192	1497	2	FBtr0079613	Others	Others	Others	Others	Others	Others	Others	Others	Others	Others	NA	-2.16686	6.71e-249	Others
FBgn0032017	CG7810	34139	Promoter (<=1kb)	0	chr2L	8311150	8311358	209	513.255	4.10745	77	1	8309876	8311195	1320	2	FBtr0079612	Others	Others	Others	Others	Others	Others	Others	Others	Others	Others	NA	0.0914421	0.76335	Others
FBgn0032020	strat	34142	Promoter (<=1kb)	0	chr2L	8320210	8320437	228	541.105	4.10745	102	1	8320328	8321285	958	1	FBtr0079601	Others	Others	Others	Others	Others	Others	Others	Others	Others	Others	NA	0.348845	0.073361	Others
FBgn0032026	CG7627	34148	Promoter (<=1kb)	-38	chr2L	8362507	8362748	242	645.127	4.10745	118	1	8355686	8362469	6784	2	FBtr0079608	Others	Others	Others	Others	Others	Others	Others	Others	Others	Others	NA	-0.276875	0.0642293	Others
FBgn0010265	RpS13	34149	Promoter (<=1kb)	0	chr2L	8364621	8364895	275	398.444	4.10745	108	1	8363477	8364662	1186	2	FBtr0346454	Others	Others	Others	Others	Others	Others	Others	Others	Others	Others	NA	-0.684917	2.29e-40	Others
FBgn0032029	CG17292	34152	Promoter (<=1kb)	0	chr2L	8370334	8370510	177	388.499	4.10745	97	1	8370454	8374250	3797	1	FBtr0345734	Others	Others	Others	Others	Others	Others	Others	Others	Others	Others	NA	0.103746	0.273773	Others
FBgn0032030	Wdr82	34153	Promoter (<=1kb)	0	chr2L	8374260	8374589	330	273.272	4.10745	165	1	8374461	8375549	1089	1	FBtr0079650	Others	Others	Others	Others	Others	Others	Others	Others	Others	Others	NA	-0.540488	5.83e-05	Others
FBgn0032031	CG13390	34154	Promoter (<=1kb)	0	chr2L	8376740	8377006	267	1487.03	4.10745	129	1	8375502	8376797	1296	2	FBtr0079723	Mitochondria	Others	Others	Others	Others	Others	Others	Others	Others	Others	NA	-0.714282	1.66e-07	MitoOthers
FBgn0027094	AlaRS	34156	Promoter (<=1kb)	0	chr2L	8381557	8381886	330	212	3.63276	165	1	8378262	8381588	3327	2	FBtr0079722	Mitochondria	Others	Others	RNA_metabolism_mito	Translation_mito	Others	Others	Others	Others	Others	NA	-0.533015	5.46e-23	Mito_EBR
FBgn0032033	CG13392	34157	Promoter (<=1kb)	0	chr2L	8382710	8382953	244	778.121	4.10745	138	1	8381821	8382807	987	2	FBtr0331995	Mitochondria	Others	Others	Others	Others	Others	Others	Others	Others	Others	NA	-1.54651	2.97e-15	MitoOthers
FBgn0263852	Dad1	34159	Promoter (<=1kb)	0	chr2L	8384134	8384287	154	228.396	4.10745	32	1	8383612	8384137	526	2	FBtr0079719	Others	Others	Others	Others	Others	Others	Others	Others	Others	Others	NA	-1.78325	1.83e-38	Others
FBgn0032036	CG13384	34160	Promoter (<=1kb)	538	chr2L	8384993	8385322	330	150.911	2.61728	165	1	8384455	8388804	4350	1	FBtr0303470	Others	Others	Others	Others	Others	Others	Others	Others	Others	Others	NA	0.556712	2.14e-10	Others
FBgn0020497	emb	34167	Promoter (<=1kb)	0	chr2L	8403327	8403643	317	754.869	4.10745	204	1	8403573	8408280	4708	1	FBtr0346708	Others	Others	Others	Others	Others	Others	Others	Others	Others	Others	NA	-0.594579	1.08e-11	Others
FBgn0027932	Akap200	34170	Promoter (<=1kb)	0	chr2L	8415653	8415739	87	230.774	4.10745	76	1	8415690	8430977	15288	1	FBtr0079667	Others	Others	Others	Others	Others	Others	Others	Others	Others	Others	NA	-0.108468	0.219792	Others
FBgn0027932	Akap200	34170	Promoter (2-3kb)	-2632	chr2L	8423812	8424141	330	232.647	4.10745	165	1	8426773	8430977	4205	1	FBtr0079666	Others	Others	Others	Others	Others	Others	Others	Others	Others	Others	NA	-0.108468	0.219792	Others
FBgn0027490	D12	34172	Promoter (<=1kb)	0	chr2L	8437303	8437428	126	428.333	4.10745	66	1	8434058	8437365	3308	2	FBtr0079707	Others	Others	Others	Others	Others	Others	Others	Others	Others	Others	NA	0.517601	0.0538079	Others
FBgn0026718	Agpat2	34176	Promoter (<=1kb)	559	chr2L	8463204	8463435	232	563.843	4.10745	110	1	8449691	8463994	14304	2	FBtr0079703	Others	Others	Others	Others	Others	Others	Others	Others	Others	Others	NA	-1.18218	3.7e-86	Others
FBgn0285971	prg	34177	Promoter (<=1kb)	0	chr2L	8464322	8464518	197	354.884	4.10745	132	1	8464488	8466529	2042	1	FBtr0079674	Others	Others	Others	Others	Others	Others	Others	Others	Others	Others	Others	-0.22747	0.184221	Others
FBgn0262029	d	34179	Intron (FBtr0303924/FBgn0262029, intron 1 of 8)	4848	chr2L	8471665	8471994	330	159.747	2.93122	165	1	8466817	8488671	21855	1	FBtr0303924	Others	Others	Others	Others	Others	Others	Others	Others	Others	Others	NA	-1.04856	2.95e-05	Others
FBgn0053194	CheA29a	246659	Intron (FBtr0303924/FBgn0262029, intron 1 of 8)	-3623	chr2L	8473587	8473726	140	163.02	3.0261	63	1	8477349	8478088	740	1	FBtr0079676	Others	Others	Others	Others	Others	Others	Others	Others	Others	Others	NA	NA	NA	Others
FBgn0262029	d	34179	Promoter (<=1kb)	-445	chr2L	8478081	8478260	180	555.623	4.10745	74	1	8478705	8488671	9967	1	FBtr0303923	Others	Others	Others	Others	Others	Others	Others	Others	Others	Others	NA	-1.04856	2.95e-05	Others
FBgn0032047	CG13088	34180	Promoter (<=1kb)	0	chr2L	8488805	8489038	234	715.582	4.10745	110	1	8488981	8490546	1566	1	FBtr0079681	Others	Others	Others	Others	Others	Others	Others	Others	Others	Others	NA	-0.353697	0.145449	Others
FBgn0032050	CG13096	34183	Promoter (<=1kb)	0	chr2L	8511787	8512083	297	1181.89	4.10745	155	1	8509069	8511866	2798	2	FBtr0343426	Others	Others	Others	Others	Others	Others	Others	Others	Others	Others	NA	-1.33082	3.4e-58	Others
FBgn0032051	CG13097	34184	Promoter (<=1kb)	0	chr2L	8514862	8515010	149	182.185	3.68726	21	1	8512174	8514868	2695	2	FBtr0079697	Others	Others	Others	Others	Others	Others	Others	Others	Others	Others	NA	-0.462301	0.000747363	Others
FBgn0032054	Uba4	34187	Promoter (<=1kb)	6	chr2L	8517417	8517598	182	530.699	4.10745	66	1	8517411	8519176	1766	1	FBtr0333414	Others	Others	Others	Others	Others	Others	Others	Others	Others	Others	NA	-0.603773	1.94e-10	Others
FBgn0085470	lmgB	44128	Promoter (<=1kb)	0	chr2L	8528483	8528696	214	433.428	4.10745	98	1	8524999	8528505	3507	2	FBtr0333420	Others	Others	Others	Others	Others	Others	Others	Others	Others	Others	NA	NA	NA	Others
FBgn0028394	CG17834	34191	Promoter (<=1kb)	-687	chr2L	8534756	8535099	344	1289.68	4.10745	165	1	8535786	8537932	2147	1	FBtr0079688	Others	Others	Others	Others	Others	Others	Others	Others	Others	Others	NA	1.0221	8.21e-38	Others
FBgn0028394	CG17834	34191	Promoter (<=1kb)	0	chr2L	8535770	8535953	184	366.146	4.10745	86	1	8535786	8537932	2147	1	FBtr0079688	Others	Others	Others	Others	Others	Others	Others	Others	Others	Others	NA	1.0221	8.21e-38	Others
FBgn0011259	Sema1a	34192	Promoter (<=1kb)	0	chr2L	8541958	8542192	235	406.288	4.10745	126	1	8542147	8671917	129771	1	FBtr0303877	Others	Others	Others	Others	Others	Others	Others	Others	Others	Others	NA	1.4455	5.03e-12	Others
FBgn0011259	Sema1a	34192	Promoter (<=1kb)	0	chr2L	8543232	8543348	117	339.092	4.10745	71	1	8543330	8667776	124447	1	FBtr0079691	Others	Others	Others	Others	Others	Others	Others	Others	Others	Others	NA	1.4455	5.03e-12	Others
FBgn0011259	Sema1a	34192	Promoter (2-3kb)	2385	chr2L	8545715	8546044	330	150.255	2.57833	165	1	8543330	8671917	128588	1	FBtr0329931	Others	Others	Others	Others	Others	Others	Others	Others	Others	Others	NA	1.4455	5.03e-12	Others
FBgn0011259	Sema1a	34192	Intron (FBtr0303877/FBgn0011259, intron 3 of 22)	9240	chr2L	8552570	8552771	202	291.091	4.10745	97	1	8543330	8671917	128588	1	FBtr0329931	Others	Others	Others	Others	Others	Others	Others	Others	Others	Others	NA	1.4455	5.03e-12	Others
FBgn0011259	Sema1a	34192	Intron (FBtr0303877/FBgn0011259, intron 3 of 22)	11042	chr2L	8554372	8554513	142	312.53	4.10745	95	1	8543330	8671917	128588	1	FBtr0329931	Others	Others	Others	Others	Others	Others	Others	Others	Others	Others	NA	1.4455	5.03e-12	Others
FBgn0051895	tRNA:Phe-GAA-1-3	3771750	Intron (FBtr0303877/FBgn0011259, intron 4 of 22)	4153	chr2L	8575041	8575296	256	960.17	4.10745	125	1	8570888	8570960	73	1	FBtr0079692	Others	Others	Others	Others	Others	Others	Others	Others	Others	Others	NA	NA	NA	Others
FBgn0051895	tRNA:Phe-GAA-1-3	3771750	Intron (FBtr0303877/FBgn0011259, intron 4 of 22)	5638	chr2L	8576526	8576855	330	179.522	3.69229	165	1	8570888	8570960	73	1	FBtr0079692	Others	Others	Others	Others	Others	Others	Others	Others	Others	Others	NA	NA	NA	Others
FBgn0264437	lncRNA:CR43855	14462727	Intron (FBtr0303877/FBgn0011259, intron 4 of 22)	7323	chr2L	8583232	8583561	330	175.065	3.47917	165	1	8590370	8590884	515	2	FBtr0332517	Others	Others	Others	Others	Others	Others	Others	Others	Others	Others	NA	NA	NA	Others
FBgn0264437	lncRNA:CR43855	14462727	Intron (FBtr0303877/FBgn0011259, intron 4 of 22)	-8282	chr2L	8602771	8602867	97	143.126	2.4205	78	1	8590370	8594489	4120	2	FBtr0332518	Others	Others	Others	Others	Others	Others	Others	Others	Others	Others	NA	NA	NA	Others
FBgn0051602	tRNA:Asp-GTC-1-6	3772028	Intron (FBtr0303877/FBgn0011259, intron 4 of 22)	-8903	chr2L	8610932	8611125	194	348.769	4.10745	106	1	8620028	8620099	72	1	FBtr0079693	Others	Others	Others	Others	Others	Others	Others	Others	Others	Others	NA	NA	NA	Others
FBgn0051602	tRNA:Asp-GTC-1-6	3772028	Intron (FBtr0303877/FBgn0011259, intron 4 of 22)	-4768	chr2L	8615074	8615260	187	331.191	4.10745	111	1	8620028	8620099	72	1	FBtr0079693	Others	Others	Others	Others	Others	Others	Others	Others	Others	Others	NA	NA	NA	Others
FBgn0004914	Hnf4	44544	Promoter (<=1kb)	-377	chr2L	8691586	8691711	126	251.406	4.10745	88	1	8687253	8691209	3957	2	FBtr0079748	Others	Others	Others	Others	Others	Others	Others	Others	Others	Others	Others	-0.12485	0.170429	Others
FBgn0004914	Hnf4	44544	Promoter (<=1kb)	-232	chr2L	8700137	8700313	177	318.902	4.10745	94	1	8687253	8699905	12653	2	FBtr0112846	Others	Others	Others	Others	Others	Others	Others	Others	Others	Others	Others	-0.12485	0.170429	Others
FBgn0004914	Hnf4	44544	Promoter (<=1kb)	-662	chr2L	8700567	8700896	330	140.371	2.33409	165	1	8687253	8699905	12653	2	FBtr0112846	Others	Others	Others	Others	Others	Others	Others	Others	Others	Others	Others	-0.12485	0.170429	Others
FBgn0004914	Hnf4	44544	Promoter (<=1kb)	0	chr2L	8709506	8709835	330	254.43	4.10745	165	1	8687226	8709611	22386	2	FBtr0336633	Others	Others	Others	Others	Others	Others	Others	Others	Others	Others	Others	-0.12485	0.170429	Others
FBgn0003209	raw	44851	Intron (FBtr0079746/FBgn0003209, intron 2 of 9)	-3248	chr2L	8717831	8718045	215	334.916	4.10745	133	1	8709880	8714583	4704	2	FBtr0340231	Others	Others	Others	Others	Others	Others	Others	Others	Others	Others	NA	1.07717	4.58e-65	Others
FBgn0003209	raw	44851	Promoter (2-3kb)	2839	chr2L	8732860	8732958	99	229.771	4.10745	97	1	8709880	8735797	25918	2	FBtr0079746	Others	Others	Others	Others	Others	Others	Others	Others	Others	Others	NA	1.07717	4.58e-65	Others
FBgn0003209	raw	44851	Promoter (2-3kb)	2236	chr2L	8738311	8738424	114	280.234	4.10745	80	1	8709880	8740660	30781	2	FBtr0079745	Others	Others	Others	Others	Others	Others	Others	Others	Others	Others	NA	1.07717	4.58e-65	Others
FBgn0003209	raw	44851	Promoter (<=1kb)	-244	chr2L	8740904	8741233	330	194.491	3.66511	165	1	8709880	8740660	30781	2	FBtr0303868	Others	Others	Others	Others	Others	Others	Others	Others	Others	Others	NA	1.07717	4.58e-65	Others
FBgn0266845	CG45307	19834846	Distal Intergenic	5626	chr2L	8746376	8746496	121	165.355	3.15647	36	1	8751715	8752122	408	2	FBtr0345576	Others	Others	Others	Others	Others	Others	Others	Others	Others	Others	NA	NA	NA	Others
FBgn0029123	SoxN	44275	Promoter (<=1kb)	-9	chr2L	8825307	8825636	330	208.658	3.63939	165	1	8825645	8829670	4026	1	FBtr0079733	Others	Others	Others	Others	Others	Others	Others	Others	Others	Others	Others	0.319284	0.146881	Others
FBgn0029123	SoxN	44275	Distal Intergenic	9236	chr2L	8834881	8835072	192	335.643	4.10745	91	1	8825645	8829670	4026	1	FBtr0330210	Others	Others	Others	Others	Others	Others	Others	Others	Others	Others	Others	0.319284	0.146881	Others
FBgn0266905	lncRNA:CR45365	19835934	Distal Intergenic	6414	chr2L	8845955	8846250	296	1003.77	4.10745	154	1	8852009	8852664	656	2	FBtr0345772	Others	Others	Others	Others	Others	Others	Others	Others	Others	Others	NA	NA	NA	Others
FBgn0266905	lncRNA:CR45365	19835934	Promoter (<=1kb)	121	chr2L	8852319	8852543	225	372.239	4.10745	123	1	8852009	8852664	656	2	FBtr0345772	Others	Others	Others	Others	Others	Others	Others	Others	Others	Others	NA	NA	NA	Others
FBgn0052986	CG32986	34208	Promoter (2-3kb)	-2642	chr2L	8859987	8860134	148	226.459	4.10745	72	1	8862776	8863743	968	1	FBtr0079734	Others	Others	Others	Others	Others	Others	Others	Others	Others	Others	NA	NA	NA	Others
FBgn0052986	CG32986	34208	Promoter (1-2kb)	-1738	chr2L	8860830	8861038	209	392.777	4.10745	133	1	8862776	8863743	968	1	FBtr0079734	Others	Others	Others	Others	Others	Others	Others	Others	Others	Others	NA	NA	NA	Others
FBgn0265588	lncRNA:CR44415	19835726	Promoter (<=1kb)	-652	chr2L	8888680	8889009	330	145.691	2.47062	165	1	8887405	8888028	624	2	FBtr0340264	Others	Others	Others	Others	Others	Others	Others	Others	Others	Others	NA	NA	NA	Others
FBgn0261630	CG42713	10178890	Promoter (2-3kb)	2804	chr2L	8894244	8894573	330	163.545	3.08715	165	1	8891440	8892180	741	1	FBtr0302995	Others	Others	Others	Others	Others	Others	Others	Others	Others	Others	NA	NA	NA	Others
FBgn0085427	CG34398	5740462	Promoter (<=1kb)	-369	chr2L	8898319	8898417	99	204.945	3.64715	55	1	8898786	8932700	33915	1	FBtr0112648	Others	Others	Others	Others	Others	Others	Others	Others	Others	Others	NA	0.0999022	0.453405	Others
FBgn0032075	Tsp29Fb	34212	Promoter (<=1kb)	-191	chr2L	8937116	8937199	84	239.4	4.10745	28	1	8937390	8939743	2354	1	FBtr0079755	Others	Others	Others	Others	Others	Others	Others	Others	Others	Others	NA	0.923224	4.49e-183	Others
FBgn0032075	Tsp29Fb	34212	Promoter (<=1kb)	632	chr2L	8938022	8938351	330	176.8	3.6979	165	1	8937390	8939743	2354	1	FBtr0273420	Others	Others	Others	Others	Others	Others	Others	Others	Others	Others	NA	0.923224	4.49e-183	Others
FBgn0032077	CG9515	3771965	Promoter (<=1kb)	0	chr2L	8943220	8943410	191	498.728	4.10745	74	1	8941945	8943257	1313	2	FBtr0340262	Mitochondria	Others	Others	Others	Others	Others	Others	Others	Others	Others	NA	-0.461635	0.0136682	MitoOthers
FBgn0032078	C1GalTA	34215	Promoter (<=1kb)	-18	chr2L	8951234	8951364	131	151.842	2.68431	95	1	8943455	8951216	7762	2	FBtr0079789	Others	Others	Others	Others	Others	Others	Others	Others	Others	Others	NA	0.531129	7.04e-05	Others
FBgn0032078	C1GalTA	34215	Promoter (1-2kb)	-1496	chr2L	8952712	8952878	167	411.094	4.10745	77	1	8943455	8951216	7762	2	FBtr0079789	Others	Others	Others	Others	Others	Others	Others	Others	Others	Others	NA	0.531129	7.04e-05	Others
FBgn0032079	CG31886	326170	Promoter (<=1kb)	-6	chr2L	8958119	8958522	404	809.155	4.10745	243	1	8953481	8958113	4633	2	FBtr0079787	Others	Others	Others	Others	Others	Others	Others	Others	Others	Others	NA	-0.962237	2.07e-22	Others
FBgn0032084	CG13101	34221	Promoter (<=1kb)	-98	chr2L	8984970	8985225	256	665.422	4.10745	125	1	8977962	8984872	6911	2	FBtr0079783	Others	Others	Others	Others	Others	Others	Others	Others	Others	Others	NA	1.1169	3.64e-28	Others
FBgn0013746	alien	34225	Promoter (<=1kb)	0	chr2L	8997355	8997674	320	921.109	4.10745	189	1	8993818	8997379	3562	2	FBtr0339550	Others	Others	Others	Others	Others	Others	Others	Others	Others	Others	NA	-0.742986	8.55e-27	Others
FBgn0052982	CG32982	34237	Promoter (<=1kb)	-58	chr2L	9125462	9125679	218	394.857	4.10745	212	1	9125737	9163716	37980	1	FBtr0079771	Others	Others	Others	Others	Others	Others	Others	Others	Others	Others	NA	1.26528	4.57e-31	Others
FBgn0052982	CG32982	34237	Intron (FBtr0079771/FBgn0052982, intron 2 of 8)	7521	chr2L	9133258	9133587	330	162.548	3.0273	165	1	9125737	9163721	37985	1	FBtr0330219	Others	Others	Others	Others	Others	Others	Others	Others	Others	Others	NA	1.26528	4.57e-31	Others
FBgn0032100	CG13108	34240	Intron (FBtr0079771/FBgn0052982, intron 4 of 8)	-5547	chr2L	9158359	9158688	330	290.554	4.10745	165	1	9164235	9165426	1192	1	FBtr0079773	Others	Others	Others	Others	Others	Others	Others	Others	Others	Others	NA	1.49495	0.0119868	Others
FBgn0032101	CG9586	34241	Promoter (<=1kb)	0	chr2L	9166459	9166663	205	325.995	4.10745	83	1	9165421	9166514	1094	2	FBtr0079774	Others	Others	Others	Others	Others	Others	Others	Others	Others	Others	NA	-1.19706	2.2e-20	Others
FBgn0041092	tai	34242	Promoter (<=1kb)	0	chr2L	9176219	9176548	330	157.306	2.93744	165	1	9176358	9247186	70829	1	FBtr0303870	Others	Others	Others	Others	Others	Others	Others	Others	Others	Others	Others	0.867841	2.01e-17	Others
FBgn0041092	tai	34242	Intron (FBtr0303871/FBgn0041092, intron 1 of 13)	14093	chr2L	9190451	9190576	126	395.41	4.10745	84	1	9176358	9250211	73854	1	FBtr0303873	Others	Others	Others	Others	Others	Others	Others	Others	Others	Others	Others	0.867841	2.01e-17	Others
FBgn0041092	tai	34242	Intron (FBtr0303871/FBgn0041092, intron 2 of 13)	17463	chr2L	9193821	9194150	330	227.967	4.10745	165	1	9176358	9250211	73854	1	FBtr0303873	Others	Others	Others	Others	Others	Others	Others	Others	Others	Others	Others	0.867841	2.01e-17	Others
FBgn0051885	tRNA:Thr-AGT-1-1	3772669	Intron (FBtr0303871/FBgn0041092, intron 2 of 13)	29725	chr2L	9206540	9206869	330	140.663	2.35447	165	1	9236521	9236594	74	2	FBtr0079820	Others	Others	Others	Others	Others	Others	Others	Others	Others	Others	NA	NA	NA	Others
FBgn0267252	Ggamma30A	45234	Intron (FBtr0079796/FBgn0267252, intron 2 of 2)	8612	chr2L	9281114	9281240	127	216.334	4.10745	42	1	9272502	9291798	19297	1	FBtr0336620	Others	Others	Others	Others	Others	Others	Others	Others	Others	Others	NA	1.19524	7.83e-73	Others
FBgn0010314	Cks30A	34250	Promoter (<=1kb)	0	chr2L	9330589	9330837	249	918.721	4.10745	134	1	9330763	9331981	1219	1	FBtr0079799	Others	Others	Others	Others	Others	Others	Others	Others	Others	Others	NA	-1.28691	6.27e-06	Others
FBgn0012036	Aldh	34256	Promoter (<=1kb)	554	chr2L	9388113	9388285	173	408.672	4.10745	91	1	9387559	9391567	4009	1	FBtr0332597	Mitochondria	Others	Others	Others	Others	Others	Others	Others	Others	Others	NA	-1.71631	0	MitoOthers
FBgn0011232	scat	47942	Promoter (<=1kb)	0	chr2L	9431255	9431472	218	333.886	4.10745	132	1	9431405	9435341	3937	1	FBtr0079809	Others	Others	Others	Others	Others	Others	Others	Others	Others	Others	NA	-0.435886	0.00191842	Others
FBgn0002973	numb	34263	Promoter (<=1kb)	0	chr2L	9437147	9437476	330	181.38	3.68892	165	1	9437469	9463123	25655	1	FBtr0079821	Others	Others	Others	Others	Others	Others	Others	Others	Others	Others	NA	0.574029	1.44e-09	Others
FBgn0002973	numb	34263	Promoter (<=1kb)	803	chr2L	9438272	9438601	330	154.15	2.82569	165	1	9437469	9463123	25655	1	FBtr0079821	Others	Others	Others	Others	Others	Others	Others	Others	Others	Others	NA	0.574029	1.44e-09	Others
FBgn0002973	numb	34263	Promoter (<=1kb)	-90	chr2L	9449511	9449740	230	663.548	4.10745	175	1	9449830	9463123	13294	1	FBtr0079822	Others	Others	Others	Others	Others	Others	Others	Others	Others	Others	NA	0.574029	1.44e-09	Others
FBgn0264269	lncRNA:CR43769	14462731	5' UTR	-9985	chr2L	9460012	9460341	330	221.948	4.10745	165	1	9470326	9470861	536	1	FBtr0331293	Others	Others	Others	Others	Others	Others	Others	Others	Others	Others	NA	NA	NA	Others
FBgn0004868	Gdi	34264	Promoter (<=1kb)	0	chr2L	9494807	9495002	196	419.396	4.10745	65	1	9491176	9494876	3701	2	FBtr0345433	Others	Others	Others	Others	Others	Others	Others	Others	Others	Others	NA	-0.609224	1.17e-56	Others
FBgn0032120	CG33298	2768929	Promoter (<=1kb)	0	chr2L	9495300	9495629	330	153.48	2.76289	165	1	9495474	9520696	25223	1	FBtr0089853	Others	Others	Others	Others	Others	Others	Others	Others	Others	Others	NA	0.0811604	0.644456	Others
FBgn0032120	CG33298	2768929	Promoter (1-2kb)	1239	chr2L	9496713	9496797	85	185.3	3.68097	11	1	9495474	9520696	25223	1	FBtr0301065	Others	Others	Others	Others	Others	Others	Others	Others	Others	Others	NA	0.0811604	0.644456	Others
FBgn0032120	CG33298	2768929	Promoter (1-2kb)	1766	chr2L	9497240	9497569	330	164.354	3.15817	165	1	9495474	9520696	25223	1	FBtr0301065	Others	Others	Others	Others	Others	Others	Others	Others	Others	Others	NA	0.0811604	0.644456	Others
FBgn0032120	CG33298	2768929	Promoter (2-3kb)	2712	chr2L	9498186	9498391	206	446.096	4.10745	128	1	9495474	9520696	25223	1	FBtr0301065	Others	Others	Others	Others	Others	Others	Others	Others	Others	Others	NA	0.0811604	0.644456	Others
FBgn0032123	Oatp30B	34268	Intron (FBtr0089853/FBgn0032120, intron 2 of 14)	-11146	chr2L	9509735	9510064	330	181.272	3.68922	165	1	9521210	9540045	18836	1	FBtr0079827	Others	Others	Others	Others	Others	Others	Others	Others	Others	Others	NA	0.388958	0.00566669	Others
FBgn0032123	Oatp30B	34268	Promoter (<=1kb)	0	chr2L	9520852	9521247	396	1597.56	4.10745	230	1	9521210	9540045	18836	1	FBtr0079827	Others	Others	Others	Others	Others	Others	Others	Others	Others	Others	NA	0.388958	0.00566669	Others
FBgn0032122	CG31883	326169	Promoter (2-3kb)	-2504	chr2L	9525745	9526011	267	990.854	4.10745	114	1	9528515	9529648	1134	1	FBtr0079829	Others	Others	Others	Others	Others	Others	Others	Others	Others	Others	NA	3.89807	0.00674643	Others
FBgn0032129	jp	34274	Promoter (<=1kb)	-631	chr2L	9567381	9567718	338	1231.17	4.10745	130	1	9547720	9566750	19031	2	FBtr0079860	Others	Others	Others	Others	Others	Others	Others	Others	Others	Others	NA	-0.324127	0.00168254	Others
FBgn0264998	lncRNA:CR44149	14462732	Promoter (<=1kb)	0	chr2L	9568561	9568888	328	2504.59	4.10745	153	1	9568155	9568785	631	2	FBtr0335493	Others	Others	Others	Others	Others	Others	Others	Others	Others	Others	NA	NA	NA	Others
FBgn0032130	brwl	34275	Promoter (<=1kb)	0	chr2L	9570085	9570275	191	232.209	4.10745	126	1	9570271	9573572	3302	1	FBtr0079835	Others	Others	Others	Others	Others	Others	Others	Others	Others	Others	NA	0.699435	3.79e-15	Others
FBgn0032130	brwl	34275	Promoter (<=1kb)	514	chr2L	9570785	9570876	92	240.444	4.10745	54	1	9570271	9573572	3302	1	FBtr0079835	Others	Others	Others	Others	Others	Others	Others	Others	Others	Others	NA	0.699435	3.79e-15	Others
FBgn0032131	CG3841	34278	Distal Intergenic	5431	chr2L	9595061	9595157	97	162.177	3.02822	59	1	9589630	9591783	2154	1	FBtr0079836	Others	Others	Others	Others	Others	Others	Others	Others	Others	Others	NA	0.0870586	0.531078	Others
FBgn0032132	CG4382	34279	Promoter (2-3kb)	2168	chr2L	9598446	9598704	259	609.048	4.10745	130	1	9598880	9600872	1993	2	FBtr0114535	Others	Others	Others	Others	Others	Others	Others	Others	Others	Others	NA	5.46578	0.339293	Others
FBgn0040070	Trx-2	34281	Promoter (<=1kb)	629	chr2L	9614043	9614372	330	223.365	4.10745	165	1	9613414	9616047	2634	1	FBtr0079840	Others	Others	Others	Others	Others	Others	Others	Others	Others	Others	NA	-0.403929	3.66e-08	Others
FBgn0040070	Trx-2	34281	Promoter (1-2kb)	1358	chr2L	9614772	9615101	330	145.694	2.47057	165	1	9613414	9616047	2634	1	FBtr0079840	Others	Others	Others	Others	Others	Others	Others	Others	Others	Others	NA	-0.403929	3.66e-08	Others
FBgn0032135	GlcAT-S	34282	Promoter (<=1kb)	0	chr2L	9616652	9616888	237	817.89	4.10745	129	1	9616836	9622588	5753	1	FBtr0302199	Others	Others	Others	Others	Others	Others	Others	Others	Others	Others	NA	0.615256	7.87e-08	Others
FBgn0032136	Apoltp	34283	Promoter (<=1kb)	-751	chr2L	9633225	9633428	204	539.084	4.10745	106	1	9634179	9656026	21848	1	FBtr0303874	Others	Others	Others	Others	Others	Others	Others	Others	Others	Others	NA	-0.65532	2.64e-18	Others
FBgn0000273	Pka-C1	34284	Intron (FBtr0079851/FBgn0000273, intron 2 of 2)	6043	chr2L	9692925	9693254	330	206.469	3.64355	165	1	9682315	9699297	16983	2	FBtr0079851	Others	Others	Others	Others	Others	Others	Others	Others	Others	Others	NA	-0.400797	6.25e-13	Others
FBgn0000273	Pka-C1	34284	Promoter (<=1kb)	0	chr2L	9699223	9699458	236	563.38	4.10745	99	1	9682315	9699297	16983	2	FBtr0079851	Others	Others	Others	Others	Others	Others	Others	Others	Others	Others	NA	-0.400797	6.25e-13	Others
FBgn0286786	hoip	44173	Promoter (<=1kb)	0	chr2L	9699693	9699843	151	361.548	4.10745	119	1	9699791	9700459	669	1	FBtr0335494	Others	Others	Others	Others	Others	Others	Others	Others	Others	Others	NA	-2.17989	5.07e-100	Others
FBgn0032138	CG4364	34287	Promoter (<=1kb)	0	chr2L	9711216	9711341	126	161.57	3.02979	46	1	9708921	9711271	2351	2	FBtr0079848	Others	Others	Others	Others	Others	Others	Others	Others	Others	Others	NA	0.959856	4.85e-80	Others
FBgn0032139	CG13116	34288	Promoter (1-2kb)	1374	chr2L	9731314	9731643	330	143.781	2.41907	165	1	9729940	9730945	1006	1	FBtr0079863	Others	Others	Others	Others	Others	Others	Others	Others	Others	Others	NA	2.27092	0.0433272	Others
FBgn0032140	CG13117	34289	Promoter (2-3kb)	-2096	chr2L	9734220	9734549	330	189.642	3.6725	165	1	9736645	9737329	685	1	FBtr0079864	Others	Others	Others	Others	Others	Others	Others	Others	Others	Others	NA	1.07468	9.58e-07	Others
FBgn0032140	CG13117	34289	Promoter (1-2kb)	1166	chr2L	9737811	9738140	330	194.603	3.66499	165	1	9736645	9737949	1305	1	FBtr0335503	Others	Others	Others	Others	Others	Others	Others	Others	Others	Others	NA	1.07468	9.58e-07	Others
FBgn0270924	zf30C	34292	Promoter (<=1kb)	0	chr2L	9758262	9758546	285	551.544	4.10745	137	1	9758342	9762375	4034	1	FBtr0079865	Others	Others	Others	Others	Others	Others	Others	Others	Others	Others	Others	-0.0426099	0.733713	Others
FBgn0270924	zf30C	34292	Promoter (<=1kb)	646	chr2L	9758988	9759221	234	574.257	4.10745	97	1	9758342	9762375	4034	1	FBtr0079865	Others	Others	Others	Others	Others	Others	Others	Others	Others	Others	Others	-0.0426099	0.733713	Others
FBgn0032147	IP3K1	34300	Promoter (2-3kb)	-2916	chr2L	9779139	9779468	330	150.471	2.57782	165	1	9782384	9788499	6116	1	FBtr0079869	Others	Others	Others	Others	Others	Others	Others	Others	Others	Others	NA	0.77337	1.63e-12	Others
FBgn0032149	CG4036	34302	Promoter (<=1kb)	0	chr2L	9790772	9790941	170	499.564	4.10745	73	1	9790882	9791958	1077	1	FBtr0303447	Others	Others	Others	Others	Others	Others	Others	Others	Others	Others	NA	-0.392732	0.0102071	Others
FBgn0264266	lncRNA:CR43766	14462734	Intron (FBtr0079914/FBgn0032151, intron 2 of 12)	14830	chr2L	9863119	9863253	135	180.108	3.69135	82	1	9848289	9848794	506	1	FBtr0331283	Others	Others	Others	Others	Others	Others	Others	Others	Others	Others	NA	NA	NA	Others
FBgn0029174	Fkbp59	47762	Promoter (<=1kb)	0	chr2L	9887897	9888035	139	403.92	4.10745	80	1	9888005	9890119	2115	1	FBtr0342837	Others	Others	Others	Others	Others	Others	Others	Others	Others	Others	NA	NA	NA	Others
FBgn0032153	CG4537	34306	Promoter (<=1kb)	0	chr2L	9890683	9891012	330	274.407	4.10745	165	1	9890885	9891336	452	1	FBtr0113031	Others	Others	Others	Others	Others	Others	Others	Others	Others	Others	NA	-0.32991	0.728003	Others
FBgn0032154	mtDNA-helicase	34307	Promoter (<=1kb)	0	chr2L	9893275	9893604	330	243.76	4.10745	165	1	9891255	9893446	2192	2	FBtr0079911	Mitochondria	mtDNA_replication	Others	Others	Others	Others	Others	Others	Others	Others	NA	-0.080368	0.609904	Mito_EBR
FBgn0063449	Uhg2	3772246	Promoter (<=1kb)	0	chr2L	9894916	9895242	327	598.988	4.10745	125	1	9893805	9895003	1199	2	FBtr0079906	Others	Others	Others	Others	Others	Others	Others	Others	Others	Others	NA	-0.495037	0.356255	Others
FBgn0004867	RpS2	34309	Promoter (<=1kb)	0	chr2L	9897339	9897699	361	969.532	4.10745	185	1	9896265	9897521	1257	2	FBtr0079905	Others	Others	Others	Others	Others	Others	Others	Others	Others	Others	NA	-0.582848	7.63e-45	Others
FBgn0032157	Etl1	34311	Promoter (<=1kb)	491	chr2L	9911788	9912117	330	156.14	2.85678	165	1	9908830	9912608	3779	2	FBtr0079901	Others	Others	Others	Others	Others	Others	Others	Others	Others	Others	NA	-0.409112	0.00955555	Others
FBgn0024285	Srp54	34312	Promoter (<=1kb)	0	chr2L	9912713	9913042	330	140.373	2.33404	165	1	9912911	9915044	2134	1	FBtr0079875	Others	Others	Others	Others	Others	Others	Others	Others	Others	Others	NA	-0.247197	0.00151157	Others
FBgn0040064	yip2	34313	Promoter (<=1kb)	-109	chr2L	9915000	9915144	145	329.268	4.10745	97	1	9915253	9917220	1968	1	FBtr0079876	Mitochondria	Others	Others	Others	Others	Others	Others	Others	Others	Others	NA	-0.251363	8.37e-08	MitoOthers
FBgn0025700	CG5885	34314	Promoter (<=1kb)	0	chr2L	9918107	9918345	239	602.952	4.10745	89	1	9917221	9918176	956	2	FBtr0079900	Others	Others	Others	Others	Others	Others	Others	Others	Others	Others	NA	-2.25484	0	Others
FBgn0032162	CG4592	34317	Promoter (<=1kb)	-9	chr2L	9921442	9921624	183	440.841	4.10745	130	1	9921633	9922766	1134	1	FBtr0079879	Mitochondria	Others	Others	Others	Others	Others	Others	Others	Others	Others	NA	-1.03348	6.91e-33	MitoOthers
FBgn0032166	CG4619	34321	Promoter (<=1kb)	0	chr2L	9938743	9938911	169	537.845	4.10745	106	1	9938863	9940845	1983	1	FBtr0300550	Mitochondria	Others	Others	RNA_metabolism_mito	Others	Others	Others	Others	Others	Others	NA	-1.54059	2.73e-57	Mito_EBR
FBgn0032167	CG5853	34322	Intron (FBtr0079894/FBgn0032167, intron 2 of 9)	3525	chr2L	9943553	9943882	330	190.731	3.67046	165	1	9940773	9947407	6635	2	FBtr0079894	Others	Others	Others	Others	Others	Others	Others	Others	Others	Others	NA	-0.931579	4.17e-24	Others
FBgn0032168	CG13126	34323	Promoter (<=1kb)	0	chr2L	9954023	9954352	330	159.72	2.93132	165	1	9952072	9954181	2110	2	FBtr0343747	Mitochondria	Others	Others	Others	Others	Others	Others	Others	Others	Others	NA	-0.918964	1.29e-08	MitoOthers
FBgn0032170	CG4658	34325	Promoter (<=1kb)	0	chr2L	9957017	9957283	267	489.51	4.10745	147	1	9957132	9960168	3037	1	FBtr0343738	Others	Others	Others	Others	Others	Others	Others	Others	Others	Others	NA	1.0477	1.85e-47	Others
FBgn0011272	RpL13	34329	Promoter (<=1kb)	0	chr2L	9967027	9967436	410	956.319	4.10745	232	1	9967313	9968491	1179	1	FBtr0079888	Others	Others	Others	Others	Others	Others	Others	Others	Others	Others	NA	-0.478617	5.44e-23	Others
FBgn0000180	bib	34330	Promoter (<=1kb)	-93	chr2L	9984356	9984552	197	244.394	4.10745	123	1	9984645	9995538	10894	1	FBtr0079929	Others	Others	Others	Others	Others	Others	Others	Others	Others	Others	NA	-0.048569	0.93424	Others
FBgn0040965	lncRNA:CR13130	19836190	Promoter (1-2kb)	-1742	chr2L	9986485	9986715	231	718.171	4.10745	125	1	9983671	9984743	1073	2	FBtr0344476	Others	Others	Others	Others	Others	Others	Others	Others	Others	Others	NA	NA	NA	Others
FBgn0051875	CG31875	318996	Promoter (<=1kb)	0	chr2L	9996400	9996695	296	423.38	4.10745	114	1	9995561	9996572	1012	2	FBtr0079973	Others	Others	Others	Others	Others	Others	Others	Others	Others	Others	NA	1.22302	0.00665475	Others
FBgn0043456	Ndf	192507	Promoter (<=1kb)	0	chr2L	10003629	10003890	262	741.472	4.10745	150	1	10003832	10007861	4030	1	FBtr0343740	Others	Others	Others	Others	Others	Others	Others	Others	Others	Others	NA	-0.995344	2.57e-70	Others
FBgn0011584	Trp1	34333	Promoter (<=1kb)	0	chr2L	10009283	10009434	152	285.833	4.10745	102	1	10009381	10012118	2738	1	FBtr0343741	Others	Others	Others	Others	Others	Others	Others	Others	Others	Others	NA	-0.651918	1.93e-29	Others
FBgn0011584	Trp1	34333	Promoter (<=1kb)	0	chr2L	10010082	10010363	282	2256.21	4.10745	152	1	10010354	10012118	1765	1	FBtr0305986	Others	Others	Others	Others	Others	Others	Others	Others	Others	Others	NA	-0.651918	1.93e-29	Others
FBgn0027600	obst-B	34336	Promoter (<=1kb)	733	chr2L	10033423	10033752	330	154.72	2.82402	165	1	10032690	10038954	6265	1	FBtr0079934	Others	Others	Others	Others	Others	Others	Others	Others	Others	Others	NA	-0.362503	1.37e-10	Others
FBgn0267727	Pen	34338	Promoter (<=1kb)	0	chr2L	10056841	10057004	164	402.681	4.10745	87	1	10056900	10060095	3196	1	FBtr0079937	Others	Others	Others	Others	Others	Others	Others	Others	Others	Others	NA	NA	NA	Others
FBgn0267727	Pen	34338	Promoter (<=1kb)	419	chr2L	10057319	10057551	233	816.282	4.10745	115	1	10056900	10060095	3196	1	FBtr0079937	Others	Others	Others	Others	Others	Others	Others	Others	Others	Others	NA	NA	NA	Others
FBgn0032187	CG4839	34348	Promoter (1-2kb)	1944	chr2L	10146720	10147049	330	152.402	2.68384	165	1	10144776	10156407	11632	1	FBtr0079944	Others	Others	Others	Others	Others	Others	Others	Others	Others	Others	NA	-0.280307	0.0618751	Others
FBgn0005593	RpL7	34352	Promoter (<=1kb)	0	chr2L	10200860	10201212	353	3137.41	4.10745	174	1	10201004	10202321	1318	1	FBtr0343653	Others	Others	Others	Others	Others	Others	Others	Others	Others	Others	NA	-0.258472	3.14e-11	Others
FBgn0085188	CG34159	34353	Promoter (<=1kb)	0	chr2L	10204138	10204467	330	177.776	3.69598	165	1	10202520	10204317	1798	2	FBtr0112350	Others	Others	Others	Others	Others	Others	Others	Others	Others	Others	NA	-0.0162943	0.83923	Others
FBgn0024320	Npc1a	34358	Promoter (<=1kb)	0	chr2L	10220694	10221645	952	9712.08	4.10745	627	1	10213812	10220952	7141	2	FBtr0303907	Others	Others	Others	Others	Others	Others	Others	Others	Others	Others	NA	0.394716	6.84e-05	Others
FBgn0032196	CG5708	34361	Promoter (<=1kb)	0	chr2L	10226701	10226965	265	781.042	4.10745	132	1	10224457	10226808	2352	2	FBtr0343607	Others	Others	Others	Others	Others	Others	Others	Others	Others	Others	NA	0.396859	0.00731873	Others
FBgn0032196	CG5708	34361	Promoter (<=1kb)	-228	chr2L	10227036	10227378	343	398.739	4.10745	251	1	10224655	10226808	2154	2	FBtr0079956	Others	Others	Others	Others	Others	Others	Others	Others	Others	Others	NA	0.396859	0.00731873	Others
FBgn0032197	ova	34362	Promoter (<=1kb)	927	chr2L	10230566	10230765	200	153.965	2.76138	74	1	10227760	10231692	3933	2	FBtr0079953	Others	Others	Others	Others	Others	Others	Others	Others	Others	Others	NA	-0.0165833	0.929515	Others
FBgn0032197	ova	34362	Promoter (<=1kb)	0	chr2L	10231271	10232004	734	6621.19	4.10745	443	1	10227760	10231692	3933	2	FBtr0079953	Others	Others	Others	Others	Others	Others	Others	Others	Others	Others	NA	-0.0165833	0.929515	Others
FBgn0032198	eEF1delta	34363	Promoter (<=1kb)	0	chr2L	10231954	10232746	793	3425.91	4.10745	502	1	10232507	10234450	1944	1	FBtr0079951	Others	Others	Others	Others	Others	Others	Others	Others	Others	Others	NA	-2.05061	9.16e-299	Others
FBgn0051720	mthl15	318914	Promoter (<=1kb)	0	chr2L	10238224	10238397	174	405.717	4.10745	112	1	10234585	10238317	3733	2	FBtr0301973	Others	Others	Others	Others	Others	Others	Others	Others	Others	Others	NA	0.845852	8.59e-05	Others
FBgn0004419	me31B	34364	Promoter (<=1kb)	0	chr2L	10238785	10239572	788	6888.47	4.10745	518	1	10239341	10242172	2832	1	FBtr0079975	Others	Others	Others	Others	Others	Others	Others	Others	Others	Others	NA	-1.18759	1.7e-63	Others
FBgn0004419	me31B	34364	Promoter (<=1kb)	0	chr2L	10239775	10240104	330	197.697	3.66014	165	1	10239939	10242172	2234	1	FBtr0079976	Others	Others	Others	Others	Others	Others	Others	Others	Others	Others	NA	-1.18759	1.7e-63	Others
FBgn0024248	chico	64880	Promoter (<=1kb)	0	chr2L	10246979	10247210	232	712.677	4.10745	123	1	10242512	10247078	4567	2	FBtr0080088	Others	Others	Others	Others	Others	Others	Others	Others	Others	Others	NA	0.639388	2.65e-11	Others
FBgn0000229	bsk	44801	Promoter (<=1kb)	0	chr2L	10249692	10250021	330	184.703	3.68236	165	1	10247502	10249742	2241	2	FBtr0302378	Others	Others	Others	Others	Others	Others	Others	Others	Others	Others	NA	-0.066019	0.322649	Others
FBgn0000229	bsk	44801	Promoter (<=1kb)	0	chr2L	10250418	10250893	476	216.204	4.10745	413	1	10247502	10250501	3000	2	FBtr0080087	Others	Others	Others	Others	Others	Others	Others	Others	Others	Others	NA	-0.066019	0.322649	Others
FBgn0000229	bsk	44801	Promoter (<=1kb)	0	chr2L	10250418	10250893	476	1167.67	4.10745	199	1	10247502	10250501	3000	2	FBtr0080087	Others	Others	Others	Others	Others	Others	Others	Others	Others	Others	NA	-0.066019	0.322649	Others
FBgn0032200	CG5676	34368	Promoter (<=1kb)	0	chr2L	10255494	10256140	647	7976.26	4.10745	418	1	10254610	10255891	1282	2	FBtr0080086	Mitochondria	Others	Others	Others	Others	Others	Others	Others	Others	Others	NA	-2.77084	2.36e-51	MitoOthers
FBgn0026379	Pten	43991	Promoter (<=1kb)	0	chr2L	10260918	10261256	339	631.761	4.10745	150	1	10256319	10261049	4731	2	FBtr0089904	Others	Others	Others	Others	Others	Others	Others	Others	Others	Others	NA	0.188425	0.241561	Others
FBgn0011305	Rsf1	34370	Promoter (<=1kb)	0	chr2L	10263231	10263776	546	7314.33	4.10745	355	1	10261795	10263554	1760	2	FBtr0333411	Others	Others	Others	Others	Others	Others	Others	Others	Others	Others	NA	-1.24322	7.31e-14	Others
FBgn0032202	REPTOR-BP	34371	Promoter (<=1kb)	0	chr2L	10263955	10264450	496	3671.52	4.10745	153	1	10264125	10265111	987	1	FBtr0089738	Others	Others	Others	Others	Others	Others	Others	Others	Others	Others	En	1.70172	2.07e-42	Others
FBgn0259482	Mob3	34372	Promoter (<=1kb)	0	chr2L	10265170	10265435	266	681.192	4.10745	135	1	10265336	10266570	1235	1	FBtr0079983	Others	Others	Others	Others	Others	Others	Others	Others	Others	Others	NA	0.296277	0.089835	Others
FBgn0032204	CG4953	34373	Promoter (<=1kb)	0	chr2L	10266535	10266864	330	146.373	2.46932	165	1	10266703	10268748	2046	1	FBtr0079984	Others	Others	Others	Others	Others	Others	Others	Others	Others	Others	NA	0.337344	0.0479071	Others
FBgn0260750	Mulk	326168	Promoter (<=1kb)	0	chr2L	10269841	10270149	309	1439.42	4.10745	169	1	10270051	10271465	1415	1	FBtr0079986	Mitochondria	Others	Others	Others	Others	Others	Others	Others	Others	Others	NA	-1.18275	3.02e-39	MitoOthers
FBgn0260749	Utx	34377	Promoter (<=1kb)	35	chr2L	10276941	10277126	186	425.485	4.10745	84	1	10272627	10277161	4535	2	FBtr0333410	Others	Others	Others	Others	Others	Others	Others	Others	Others	Others	NA	0.522344	0.00116697	Others
FBgn0260749	Utx	34377	Promoter (<=1kb)	0	chr2L	10277450	10277737	288	944.706	4.10745	146	1	10272325	10277551	5227	2	FBtr0080076	Others	Others	Others	Others	Others	Others	Others	Others	Others	Others	NA	0.522344	0.00116697	Others
FBgn0032210	CYLD	34380	Promoter (<=1kb)	-186	chr2L	10298453	10298620	168	427.999	4.10745	68	1	10295866	10298267	2402	2	FBtr0080072	Others	Others	Others	Others	Others	Others	Others	Others	Others	Others	NA	0.243606	0.135437	Others
FBgn0032210	CYLD	34380	Promoter (<=1kb)	0	chr2L	10299816	10300069	254	560.696	4.10745	149	1	10295859	10299847	3989	2	FBtr0080070	Others	Others	Others	Others	Others	Others	Others	Others	Others	Others	NA	0.243606	0.135437	Others
FBgn0005322	nmd	44021	Promoter (<=1kb)	0	chr2L	10303879	10304053	175	401.63	4.10745	70	1	10302173	10303947	1775	2	FBtr0343612	Mitochondria	Others	Others	Others	Others	Others	Others	Others	Others	Others	NA	-0.506951	3.19e-11	MitoOthers
FBgn0032214	CG4968	34384	Promoter (<=1kb)	0	chr2L	10306741	10306956	216	492.464	4.10745	109	1	10306922	10308045	1124	1	FBtr0079987	Others	Others	Others	Others	Others	Others	Others	Others	Others	Others	NA	-0.743842	5.39e-14	Others
FBgn0027491	Cdk5alpha	34385	Promoter (<=1kb)	-141	chr2L	10311097	10311244	148	226.28	4.10745	105	1	10308131	10310956	2826	2	FBtr0331670	Others	Others	Others	Others	Others	Others	Others	Others	Others	Others	NA	1.16123	1.29e-12	Others
FBgn0267365	l(2)SH0834	34386	Promoter (<=1kb)	0	chr2L	10311863	10312358	496	7007.51	4.10745	283	1	10311050	10312099	1050	2	FBtr0080062	Others	Others	Others	Others	Others	Others	Others	Others	Others	Others	NA	-1.31067	1.76e-10	Others
FBgn0032216	Usp14	34387	Promoter (<=1kb)	0	chr2L	10314067	10315070	1004	1214.51	4.10745	777	1	10312265	10314396	2132	2	FBtr0331669	Others	Others	Others	Others	Others	Others	Others	Others	Others	Others	NA	-1.01531	2.44e-55	Others
FBgn0032216	Usp14	34387	Promoter (<=1kb)	0	chr2L	10314067	10315070	1004	5428.85	4.10745	349	1	10312265	10314396	2132	2	FBtr0331669	Others	Others	Others	Others	Others	Others	Others	Others	Others	Others	NA	-1.01531	2.44e-55	Others
FBgn0032218	CG5381	34389	Promoter (<=1kb)	447	chr2L	10321026	10321355	330	143.539	2.41961	165	1	10317497	10321802	4306	2	FBtr0080060	Others	Others	Others	Others	Others	Others	Others	Others	Others	Others	NA	-0.246377	0.000165012	Others
FBgn0011703	RnrL	34392	Promoter (<=1kb)	0	chr2L	10327840	10328142	303	1333.38	4.10745	156	1	10325026	10327943	2918	2	FBtr0080059	Others	Others	Others	Others	Others	Others	Others	Others	Others	Others	NA	-2.17118	7.87e-144	Others
FBgn0032222	CG5037	34394	Promoter (<=1kb)	0	chr2L	10331414	10331495	82	161.124	2.97673	43	1	10331471	10333129	1659	1	FBtr0079992	Mitochondria	Others	Others	Others	Others	Others	Others	Others	Others	Heme_metabolism	NA	-0.907599	8.02e-35	MitoOthers
FBgn0032223	GATAd	34395	Promoter (<=1kb)	-264	chr2L	10333131	10333470	340	1211.58	4.10745	150	1	10333734	10338441	4708	1	FBtr0333097	Others	Others	Others	Others	Others	Others	Others	Others	Others	Others	Others	1.05129	6.09e-16	Others
FBgn0032223	GATAd	34395	Promoter (<=1kb)	0	chr2L	10333590	10333885	296	542.383	4.10745	220	1	10333734	10338441	4708	1	FBtr0333097	Others	Others	Others	Others	Others	Others	Others	Others	Others	Others	Others	1.05129	6.09e-16	Others
FBgn0032223	GATAd	34395	Promoter (1-2kb)	1059	chr2L	10334973	10335109	137	657.006	4.10745	79	1	10333914	10339185	5272	1	FBtr0333098	Others	Others	Others	Others	Others	Others	Others	Others	Others	Others	Others	1.05129	6.09e-16	Others
FBgn0019932	SamDC	34396	Promoter (<=1kb)	0	chr2L	10339302	10339517	216	618.259	4.10745	128	1	10339457	10341503	2047	1	FBtr0079994	Others	Others	Others	Others	Others	Others	Others	Others	Others	Others	NA	-0.367907	0.000155002	Others
FBgn0051715	CG31715	318909	Promoter (<=1kb)	0	chr2L	10341533	10341644	112	233.255	4.10745	76	1	10341616	10342523	908	1	FBtr0079996	Others	Others	Others	Others	Others	Others	Others	Others	Others	Others	NA	-0.906992	5.4e-14	Others
FBgn0032224	Sps2	34397	Promoter (<=1kb)	0	chr2L	10342550	10342879	330	233.276	4.10745	165	1	10342594	10344223	1630	1	FBtr0079998	Others	Others	Others	Others	Others	Others	Others	Others	Others	Others	NA	0.443611	6.16e-05	Others
FBgn0032225	CG5022	34398	Promoter (<=1kb)	0	chr2L	10344132	10344461	330	151.069	2.61692	165	1	10344442	10347706	3265	1	FBtr0079999	Others	Others	Others	Others	Others	Others	Others	Others	Others	Others	NA	0.829687	0.00447402	Others
FBgn0085396	CG34367	5740879	Promoter (<=1kb)	-535	chr2L	10354440	10354769	330	179.301	3.69305	165	1	10347851	10353905	6055	2	FBtr0112592	Others	Others	Others	Others	Others	Others	Others	Others	Others	Others	Others	1.09638	0.0973524	Others
FBgn0032228	CG5367	34401	Promoter (<=1kb)	0	chr2L	10356485	10357183	699	11292.7	4.10745	304	1	10354743	10356597	1855	2	FBtr0080055	Others	Others	Others	Others	Others	Others	Others	Others	Others	Others	NA	-0.137098	0.68094	Others
FBgn0003087	pim	34404	Promoter (<=1kb)	0	chr2L	10362867	10363151	285	1029.11	4.10745	120	1	10362989	10364046	1058	1	FBtr0080001	Others	Others	Others	Others	Others	Others	Others	Others	Others	Others	NA	-0.248311	0.762203	Others
FBgn0032230	lft	34405	Promoter (<=1kb)	0	chr2L	10364344	10364499	156	310.969	4.10745	95	1	10364471	10366410	1940	1	FBtr0080002	Others	Others	Others	Others	Others	Others	Others	Others	Others	Others	NA	0.197176	0.240349	Others
FBgn0032231	CG5056	34406	Promoter (<=1kb)	0	chr2L	10366436	10367030	595	17464.4	4.10745	236	1	10366692	10367946	1255	1	FBtr0080003	Others	Others	Others	Others	Others	Others	Others	Others	Others	Others	NA	0.787493	2.27e-08	Others
FBgn0041723	rho-5	2768944	Promoter (1-2kb)	1376	chr2L	10372415	10372524	110	444.998	4.10745	107	1	10368025	10373900	5876	2	FBtr0089855	Others	Others	Others	Others	Others	Others	Others	Others	Others	Others	NA	1.27058	1.46e-06	Others
FBgn0053303	CG33303	2768916	Promoter (<=1kb)	-33	chr2L	10375790	10375931	142	175.207	3.479	9	1	10374186	10375757	1572	2	FBtr0080052	Others	Others	Others	Others	Others	Others	Others	Others	Others	Others	NA	-1.4119	5.57e-162	Others
FBgn0032234	gny	34409	Promoter (<=1kb)	0	chr2L	10379824	10380313	490	8173.56	4.10745	243	1	10380103	10381828	1726	1	FBtr0332193	Others	Others	Others	Others	Others	Others	Others	Others	Others	Others	NA	-0.0770774	0.687177	Others
FBgn0032235	CG5096	34410	Promoter (<=1kb)	-66	chr2L	10381964	10382197	234	735.504	4.10745	119	1	10382263	10384723	2461	1	FBtr0080006	Others	Others	Others	Others	Others	Others	Others	Others	Others	Others	NA	0.629826	1.22e-22	Others
FBgn0004106	Cdk1	34411	Promoter (<=1kb)	0	chr2L	10385933	10387008	1076	1343.5	4.10745	716	1	10384739	10386262	1524	2	FBtr0080051	Others	Others	Others	Others	Others	Others	Others	Others	Others	Others	NA	-1.04349	0.000838221	Others
FBgn0004106	Cdk1	34411	Promoter (<=1kb)	0	chr2L	10385933	10387008	1076	2657.74	4.10745	339	1	10384739	10386262	1524	2	FBtr0080051	Others	Others	Others	Others	Others	Others	Others	Others	Others	Others	NA	-1.04349	0.000838221	Others
FBgn0267821	da	34413	Promoter (<=1kb)	0	chr2L	10387873	10388209	337	1758.48	4.10745	157	1	10388105	10392728	4624	1	FBtr0332196	Others	Others	Others	Others	Others	Others	Others	Others	Others	Others	Others	0.302639	0.00326697	Others
FBgn0051716	Cnot4	34416	Promoter (<=1kb)	0	chr2L	10396630	10396717	88	177.956	3.69563	87	1	10396716	10402882	6167	1	FBtr0080009	Others	Others	Others	Others	Others	Others	Others	Others	Others	Others	NA	0.0538003	0.645634	Others
FBgn0032240	CG17768	3772012	Promoter (<=1kb)	0	chr2L	10403844	10404302	459	441.538	4.10745	391	1	10403197	10404021	825	2	FBtr0304111	Others	Others	Others	Others	Others	Others	Others	Others	Others	Others	NA	NA	NA	Others
FBgn0032240	CG17768	3772012	Promoter (<=1kb)	0	chr2L	10403844	10404302	459	997.761	4.10745	184	1	10403197	10404021	825	2	FBtr0304111	Others	Others	Others	Others	Others	Others	Others	Others	Others	Others	NA	NA	NA	Others
FBgn0051718	Ir31a	318912	Promoter (1-2kb)	1200	chr2L	10406765	10406959	195	274.658	4.10745	40	1	10405565	10408197	2633	1	FBtr0336968	Others	Others	Others	Others	Others	Others	Others	Others	Others	Others	NA	5.59691	0.295753	Others
FBgn0003942	RpS27A	34420	Promoter (<=1kb)	-682	chr2L	10407450	10407670	221	187.572	3.67654	47	1	10408352	10410456	2105	1	FBtr0080016	Others	Others	Others	Others	Others	Others	Others	Others	Others	Others	NA	-0.59851	9.05e-34	Others
FBgn0003942	RpS27A	34420	Promoter (<=1kb)	0	chr2L	10408116	10408625	510	12479.3	4.10745	177	1	10408352	10410456	2105	1	FBtr0080016	Others	Others	Others	Others	Others	Others	Others	Others	Others	Others	NA	-0.59851	9.05e-34	Others
FBgn0032243	Klp31E	34422	Promoter (<=1kb)	-23	chr2L	10413754	10413994	241	607.905	4.10745	156	1	10414017	10418991	4975	1	FBtr0080018	Others	Others	Others	Others	Others	Others	Others	Others	Others	Others	NA	0.222153	0.215879	Others
FBgn0032244	RfC3	34423	Promoter (<=1kb)	0	chr2L	10418971	10419370	400	4302.51	4.10745	173	1	10419190	10420612	1423	1	FBtr0080019	Others	Others	Others	Others	Others	Others	Others	Others	Others	Others	NA	-1.96865	9.35e-19	Others
FBgn0032244	RfC3	34423	Promoter (1-2kb)	1628	chr2L	10420818	10421147	330	158.969	2.93325	165	1	10419190	10420612	1423	1	FBtr0080019	Others	Others	Others	Others	Others	Others	Others	Others	Others	Others	NA	-1.96865	9.35e-19	Others
FBgn0005683	pie	44315	Promoter (<=1kb)	0	chr2L	10422600	10422975	376	1865.53	4.10745	191	1	10420625	10422780	2156	2	FBtr0333490	Others	Others	Others	Others	Others	Others	Others	Others	Others	Others	NA	0.638202	0.0903508	Others
FBgn0032246	Wdfy2	34425	Promoter (<=1kb)	0	chr2L	10423123	10423638	516	6113.67	4.10745	231	1	10423291	10425482	2192	1	FBtr0304117	Others	Others	Others	Others	Others	Others	Others	Others	Others	Others	NA	-0.00471372	0.929665	Others
FBgn0267330	KdelR	34427	Promoter (<=1kb)	0	chr2L	10426850	10427179	330	175.185	3.47906	165	1	10426887	10428159	1273	1	FBtr0080021	Others	Others	Others	Others	Others	Others	Others	Others	Others	Others	NA	-1.15303	1.11e-97	Others
FBgn0032247	CG5188	34428	Promoter (<=1kb)	0	chr2L	10428777	10428862	86	212.277	3.63202	35	1	10428829	10429988	1160	1	FBtr0080024	Mitochondria	Others	Others	Others	Others	Others	Others	Others	Others	Others	NA	-1.08515	9.89e-12	MitoOthers
FBgn0032248	Bug22	34429	Promoter (<=1kb)	0	chr2L	10430712	10431149	438	3371.35	4.10745	250	1	10429920	10430918	999	2	FBtr0080044	Others	Others	Others	Others	Others	Others	Others	Others	Others	Others	NA	-0.416551	0.0119537	Others
FBgn0032250	holn1	34432	Promoter (<=1kb)	0	chr2L	10435884	10436213	330	155.893	2.85741	165	1	10435995	10437316	1322	1	FBtr0080026	Others	Others	Others	Others	Others	Others	Others	Others	Others	Others	NA	-0.339604	0.0746452	Others
FBgn0027052	STUB1	34433	Promoter (<=1kb)	0	chr2L	10437402	10437649	248	860.567	4.10745	119	1	10437548	10439240	1693	1	FBtr0080027	Others	Others	Others	Others	Others	Others	Others	Others	Others	Others	NA	0.280572	0.0198815	Others
FBgn0032251	Nse4	34434	Promoter (<=1kb)	0	chr2L	10439249	10439605	357	3534.95	4.10745	157	1	10439440	10440693	1254	1	FBtr0301167	Others	Others	Others	Others	Others	Others	Others	Others	Others	Others	NA	-0.320271	0.447111	Others
FBgn0266915	lncRNA:CR45375	19835802	Promoter (<=1kb)	20	chr2L	10442078	10442184	107	180.027	3.69141	56	1	10441820	10442204	385	2	FBtr0345773	Others	Others	Others	Others	Others	Others	Others	Others	Others	Others	NA	NA	NA	Others
FBgn0051719	RluA-1	34438	Intron (FBtr0080039/FBgn0051719, intron 2 of 10)	5626	chr2L	10468538	10468723	186	393.806	4.10745	74	1	10463340	10474349	11010	2	FBtr0080039	Others	Others	Others	Others	Others	Others	Others	Others	Others	Others	NA	0.413036	0.0031839	Others
FBgn0051719	RluA-1	34438	Promoter (<=1kb)	0	chr2L	10474346	10474679	334	2099.92	4.10745	185	1	10463340	10474349	11010	2	FBtr0080039	Others	Others	Others	Others	Others	Others	Others	Others	Others	Others	NA	0.413036	0.0031839	Others
FBgn0032256	RluA-2	34440	Promoter (2-3kb)	2780	chr2L	10479853	10480182	330	320.747	4.10745	165	1	10477073	10482975	5903	1	FBtr0337003	Others	Others	Others	Others	Others	Others	Others	Others	Others	Others	NA	-0.212262	0.247796	Others
FBgn0032260	CG13144	34444	Intron (FBtr0080035/FBgn0086347, intron 3 of 9)	-6060	chr2L	10497514	10497687	174	400.707	4.10745	84	1	10489900	10491454	1555	2	FBtr0080037	Others	Others	Others	Others	Others	Others	Others	Others	Others	Others	NA	0.324678	0.849569	Others
FBgn0265155	asRNA:CR44224	14462736	Promoter (1-2kb)	-1149	chr2L	10505065	10505152	88	256.685	4.10745	13	1	10506301	10507015	715	1	FBtr0337005	Others	Others	Others	Others	Others	Others	Others	Others	Others	Others	NA	NA	NA	Others
FBgn0086347	Myo31DF	34445	Promoter (<=1kb)	0	chr2L	10506752	10507065	314	659.228	4.10745	108	1	10491814	10506779	14966	2	FBtr0080035	Others	Others	Others	Others	Others	Others	Others	Others	Others	Others	NA	-0.0125313	0.875774	Others
FBgn0267828	Fatp1	26067068	Promoter (<=1kb)	-96	chr2L	10516764	10516933	170	256.796	4.10745	43	1	10511253	10516668	5416	2	FBtr0347403	Others	Others	Others	Others	Others	Others	Others	Others	Others	Others	NA	NA	NA	Others
FBgn0010398	Lrr47	34449	Promoter (<=1kb)	0	chr2L	10517128	10517457	330	147.254	2.48215	165	1	10517335	10518984	1650	1	FBtr0080092	Others	Others	Others	Others	Others	Others	Others	Others	Others	Others	NA	0.135507	0.609561	Others
FBgn0010398	Lrr47	34449	Promoter (2-3kb)	2025	chr2L	10519360	10519540	181	355.257	4.10745	107	1	10517335	10519269	1935	1	FBtr0331671	Others	Others	Others	Others	Others	Others	Others	Others	Others	Others	NA	0.135507	0.609561	Others
FBgn0032264	Lip4	34450	Promoter (<=1kb)	-45	chr2L	10527276	10527527	252	695.905	4.10745	140	1	10527572	10531778	4207	1	FBtr0331672	Others	Others	Others	Others	Others	Others	Others	Others	Others	Others	NA	1.58503	2.13e-44	Others
FBgn0265829	lncRNA:CR44618	19834771	Promoter (<=1kb)	0	chr2L	10543485	10543717	233	411.588	4.10745	124	1	10542860	10543522	663	2	FBtr0342714	Others	Others	Others	Others	Others	Others	Others	Others	Others	Others	NA	NA	NA	Others
FBgn0051721	Trim9	34453	Intron (FBtr0080096/FBgn0051721, intron 1 of 8)	8042	chr2L	10552925	10553047	123	411.975	4.10745	81	1	10544883	10628054	83172	1	FBtr0304114	Others	Others	Others	Others	Others	Others	Others	Others	Others	Others	NA	1.28785	1.65e-11	Others
FBgn0051721	Trim9	34453	Intron (FBtr0080096/FBgn0051721, intron 1 of 8)	10494	chr2L	10555377	10555498	122	142.547	2.3963	63	1	10544883	10628054	83172	1	FBtr0304114	Others	Others	Others	Others	Others	Others	Others	Others	Others	Others	NA	1.28785	1.65e-11	Others
FBgn0032268	CG6138	34454	Promoter (1-2kb)	-1293	chr2L	10565789	10565962	174	359.263	4.10745	86	1	10567255	10568012	758	1	FBtr0080098	Others	Others	Others	Others	Others	Others	Others	Others	Others	Others	NA	5.143	0.328766	Others
FBgn0032271	CG7329	34457	Intron (FBtr0080096/FBgn0051721, intron 1 of 8)	15874	chr2L	10614988	10615317	330	173.984	3.48107	165	1	10629352	10631191	1840	2	FBtr0080131	Others	Others	Others	Others	Others	Others	Others	Others	Others	Others	NA	0.279572	0.502088	Others
FBgn0032271	CG7329	34457	Intron (FBtr0080096/FBgn0051721, intron 1 of 8)	14129	chr2L	10616830	10617062	233	555.61	4.10745	115	1	10629352	10631191	1840	2	FBtr0080131	Others	Others	Others	Others	Others	Others	Others	Others	Others	Others	NA	0.279572	0.502088	Others
FBgn0051871	CG31871	34463	Promoter (<=1kb)	-246	chr2L	10661676	10661835	160	259.912	4.10745	55	1	10662081	10671487	9407	1	FBtr0080104	Others	Others	Others	Others	Others	Others	Others	Others	Others	Others	NA	0.415118	0.0136887	Others
FBgn0051871	CG31871	34463	Intron (FBtr0080104/FBgn0051871, intron 1 of 4)	3610	chr2L	10665691	10665910	220	651.555	4.10745	129	1	10662081	10671487	9407	1	FBtr0080104	Others	Others	Others	Others	Others	Others	Others	Others	Others	Others	NA	0.415118	0.0136887	Others
FBgn0032286	CG7300	34472	Promoter (<=1kb)	-64	chr2L	10698107	10698280	174	297.397	4.10745	88	1	10695209	10698043	2835	2	FBtr0080125	Others	Others	Others	Others	Others	Others	Others	Others	Others	Others	NA	0.307306	0.891008	Others
FBgn0032287	CG6415	34474	Promoter (<=1kb)	-17	chr2L	10703371	10703604	234	729.295	4.10745	108	1	10703621	10704930	1310	1	FBtr0080108	Mitochondria	Others	Others	Others	Others	Others	Others	Others	Others	Others	NA	-1.9289	8.52e-119	MitoOthers
FBgn0032290	CG6443	34477	Promoter (<=1kb)	0	chr2L	10728789	10729118	330	207.001	3.64289	165	1	10728978	10730302	1325	1	FBtr0080110	Others	Others	Others	Others	Others	Others	Others	Others	Others	Others	NA	0.375335	0.0135963	Others
FBgn0032292	EMC3	34479	Promoter (<=1kb)	0	chr2L	10732415	10732623	209	629.685	4.10745	110	1	10731400	10732423	1024	2	FBtr0080122	Others	Others	Others	Others	Others	Others	Others	Others	Others	Others	NA	-1.06163	4.29e-42	Others
FBgn0027868	Nup107	34481	Promoter (<=1kb)	0	chr2L	10735992	10736286	295	669.846	4.10745	128	1	10733293	10736071	2779	2	FBtr0080121	Others	Others	Others	Others	Others	Others	Others	Others	Others	Others	NA	-1.50735	5.04e-63	Others
FBgn0032295	CG12299	34483	Promoter (<=1kb)	0	chr2L	10737188	10737480	293	1254.13	4.10745	136	1	10737345	10740762	3418	1	FBtr0080113	Others	Others	Others	Others	Others	Others	Others	Others	Others	Others	En	1.29235	2.61e-12	Others
FBgn0283551	mir-9378	30522416	Promoter (<=1kb)	-4	chr2L	10751942	10752290	349	2136.83	4.10745	154	1	10751877	10751938	62	2	FBtr0445459	Others	Others	Others	Others	Others	Others	Others	Others	Others	Others	NA	NA	NA	Others
FBgn0032297	CG17124	34485	Promoter (1-2kb)	1505	chr2L	10754736	10754820	85	216.325	4.10745	69	1	10744075	10756325	12251	2	FBtr0080118	Others	Others	Others	Others	Others	Others	Others	Others	Others	Others	NA	0.134163	0.234283	Others
FBgn0032297	CG17124	34485	Promoter (<=1kb)	0	chr2L	10756064	10756393	330	144.835	2.45798	165	1	10744075	10756325	12251	2	FBtr0080118	Others	Others	Others	Others	Others	Others	Others	Others	Others	Others	NA	0.134163	0.234283	Others
FBgn0015320	Ubc2	34487	Promoter (<=1kb)	0	chr2L	10767933	10768122	190	465.366	4.10745	89	1	10765010	10767939	2930	2	FBtr0333492	Others	Others	Others	Others	Others	Others	Others	Others	Others	Others	NA	NA	NA	Others
FBgn0004363	porin	34500	Promoter (<=1kb)	0	chr2L	10850800	10851043	244	741.073	4.10745	115	1	10847425	10850848	3424	2	FBtr0100584	Mitochondria	Others	Others	Others	Others	Others	Others	Others	Others	Others	NA	-1.38869	0	MitoOthers
FBgn0027453	Dnz1	34503	Promoter (<=1kb)	0	chr2L	10856580	10856737	158	263.886	4.10745	61	1	10854435	10856644	2210	2	FBtr0080181	Others	Others	Others	Others	Others	Others	Others	Others	Others	Others	NA	0.33545	0.0041056	Others
FBgn0261871	dpr2	3346227	Promoter (<=1kb)	-420	chr2L	10964573	10964728	156	321.562	4.10745	119	1	10917692	10964153	46462	2	FBtr0340554	Others	Others	Others	Others	Others	Others	Others	Others	Others	Others	NA	1.74586	6.78e-10	Others
FBgn0053129	CG33129	34514	Promoter (<=1kb)	-394	chr2L	10967205	10967534	330	173.583	3.4821	165	1	10964905	10966811	1907	2	FBtr0340552	Others	Others	Others	Others	Others	Others	Others	Others	Others	Others	NA	-2.17504	0	Others
FBgn0053129	CG33129	34514	Promoter (<=1kb)	0	chr2L	10968141	10968263	123	235.407	4.10745	60	1	10964905	10968166	3262	2	FBtr0080170	Others	Others	Others	Others	Others	Others	Others	Others	Others	Others	NA	-2.17504	0	Others
FBgn0032321	YL-1	34516	Promoter (<=1kb)	-33	chr2L	10970318	10970410	93	247.78	4.10745	87	1	10970443	10971870	1428	1	FBtr0080146	Others	Others	Others	Others	Others	Others	Others	Others	Others	Others	En	-0.148914	0.569117	Others
FBgn0015756	RpL9	34526	Promoter (<=1kb)	0	chr2L	11004021	11004267	247	551.299	4.10745	131	1	11002758	11004153	1396	2	FBtr0340226	Others	Others	Others	Others	Others	Others	Others	Others	Others	Others	NA	-0.674121	2.65e-41	Others
FBgn0032329	Art8	34528	Promoter (<=1kb)	0	chr2L	11011034	11011183	150	217.47	4.10745	106	1	11009821	11011086	1266	2	FBtr0080162	Others	Others	Others	Others	Others	Others	Others	Others	Others	Others	NA	-1.28179	0.000583429	Others
FBgn0040967	CG18666	50441	Intron (FBtr0331197/FBgn0032330, intron 2 of 6)	10229	chr2L	11045024	11045353	330	152.665	2.70873	165	1	11034795	11035308	514	1	FBtr0080160	Others	Others	Others	Others	Others	Others	Others	Others	Others	Others	NA	0.825909	0.406952	Others
FBgn0032330	Samuel	34530	Promoter (<=1kb)	-407	chr2L	11057871	11058152	282	679.536	4.10745	149	1	11028784	11057464	28681	2	FBtr0347160	Others	Others	Others	Others	Others	Others	Others	Others	Others	Others	NA	0.334555	0.158328	Others
FBgn0032341	Reps	34542	Promoter (<=1kb)	0	chr2L	11106618	11106989	372	2415.77	4.10745	208	1	11100963	11106645	5683	2	FBtr0080230	Others	Others	Others	Others	Others	Others	Others	Others	Others	Others	NA	0.0567809	0.773912	Others
FBgn0262647	Nup160	34549	Promoter (<=1kb)	0	chr2L	11123571	11123803	233	539.147	4.10745	111	1	11123777	11128992	5216	1	FBtr0343613	Others	Others	Others	Others	Others	Others	Others	Others	Others	Others	NA	-1.08491	1.12e-11	Others
FBgn0014076	Vm32E	34558	Promoter (<=1kb)	-323	chr2L	11171988	11172317	330	248.044	4.10745	165	1	11171229	11171665	437	2	FBtr0080216	Others	Others	Others	Others	Others	Others	Others	Others	Others	Others	NA	NA	NA	Others
FBgn0032354	CG4788	34559	Promoter (<=1kb)	0	chr2L	11178929	11179075	147	204.011	3.64865	82	1	11179032	11180231	1200	1	FBtr0343614	Others	Others	Others	Others	Others	Others	Others	Others	Others	Others	NA	-0.584127	0.00831793	Others
FBgn0032354	CG4788	34559	Intron (FBtr0310280/FBgn0259822, intron 2 of 11)	5273	chr2L	11184305	11184450	146	210.92	3.63491	96	1	11179032	11180430	1399	1	FBtr0080202	Others	Others	Others	Others	Others	Others	Others	Others	Others	Others	NA	-0.584127	0.00831793	Others
FBgn0032354	CG4788	34559	Intron (FBtr0310280/FBgn0259822, intron 2 of 11)	10184	chr2L	11189216	11189420	205	418.649	4.10745	117	1	11179032	11180430	1399	1	FBtr0080202	Others	Others	Others	Others	Others	Others	Others	Others	Others	Others	NA	-0.584127	0.00831793	Others
FBgn0259822	Ca-beta	34557	Intron (FBtr0310280/FBgn0259822, intron 2 of 11)	10507	chr2L	11192780	11193037	258	1101.56	4.10745	138	1	11157195	11203544	46350	2	FBtr0310280	Others	Others	Others	Others	Others	Others	Others	Others	Others	Others	NA	NA	NA	Others
FBgn0259822	Ca-beta	34557	Intron (FBtr0310280/FBgn0259822, intron 2 of 11)	4187	chr2L	11199225	11199357	133	189.594	3.67268	74	1	11157195	11203544	46350	2	FBtr0310280	Others	Others	Others	Others	Others	Others	Others	Others	Others	Others	NA	NA	NA	Others
FBgn0259822	Ca-beta	34557	Promoter (<=1kb)	-227	chr2L	11203771	11203853	83	218.195	4.10745	40	1	11157195	11203544	46350	2	FBtr0310280	Others	Others	Others	Others	Others	Others	Others	Others	Others	Others	NA	NA	NA	Others
FBgn0264441	lncRNA:CR43859	14462741	Promoter (<=1kb)	-909	chr2L	11207001	11207095	95	395.447	4.10745	43	1	11205528	11206092	565	2	FBtr0332563	Others	Others	Others	Others	Others	Others	Others	Others	Others	Others	NA	NA	NA	Others
FBgn0264442	ab	34560	Promoter (1-2kb)	-1405	chr2L	11209029	11209273	245	775.87	4.10745	125	1	11210678	11260808	50131	1	FBtr0332557	Others	Others	Others	Others	Others	Others	Others	Others	Others	Others	En	-0.14831	0.0268691	Others
FBgn0264442	ab	34560	Intron (FBtr0332557/FBgn0264442, intron 2 of 8)	9031	chr2L	11220828	11221157	330	165.902	3.24257	165	1	11211797	11257466	45670	1	FBtr0332561	Others	Others	Others	Others	Others	Others	Others	Others	Others	Others	En	-0.14831	0.0268691	Others
FBgn0264442	ab	34560	Intron (FBtr0332557/FBgn0264442, intron 2 of 8)	9683	chr2L	11221480	11221809	330	253.281	4.10745	165	1	11211797	11257466	45670	1	FBtr0332561	Others	Others	Others	Others	Others	Others	Others	Others	Others	Others	En	-0.14831	0.0268691	Others
FBgn0264442	ab	34560	Intron (FBtr0332557/FBgn0264442, intron 2 of 8)	10397	chr2L	11222194	11222366	173	284.548	4.10745	89	1	11211797	11257466	45670	1	FBtr0332561	Others	Others	Others	Others	Others	Others	Others	Others	Others	Others	En	-0.14831	0.0268691	Others
FBgn0264442	ab	34560	Intron (FBtr0332557/FBgn0264442, intron 2 of 8)	11228	chr2L	11223025	11223127	103	176.635	3.69825	45	1	11211797	11257466	45670	1	FBtr0332561	Others	Others	Others	Others	Others	Others	Others	Others	Others	Others	En	-0.14831	0.0268691	Others
FBgn0086035	snoRNA:Me18S-G642	5740292	Promoter (<=1kb)	0	chr2L	11234776	11234899	124	190.435	3.67083	70	1	11234835	11234912	78	1	FBtr0114311	Others	Others	Others	Others	Others	Others	Others	Others	Others	Others	NA	NA	NA	Others
FBgn0264442	ab	34560	Intron (FBtr0332557/FBgn0264442, intron 7 of 8)	4902	chr2L	11239753	11240082	330	149.19	2.50946	165	1	11234851	11260808	25958	1	FBtr0332562	Others	Others	Others	Others	Others	Others	Others	Others	Others	Others	En	-0.14831	0.0268691	Others
FBgn0040232	cmet	53561	Promoter (<=1kb)	0	chr2L	11268957	11269268	312	901.096	4.10745	145	1	11261026	11269002	7977	2	FBtr0332202	Others	Others	Others	Others	Others	Others	Others	Others	Others	Others	NA	-2.52253	0.00325801	Others
FBgn0052831	CG33695	3772186	Promoter (<=1kb)	0	chr2L	11277894	11278093	200	448.555	4.10745	98	1	11278021	11279847	1827	1	FBtr0091682	Others	Others	Others	Others	Others	Others	Others	Others	Others	Others	NA	0.160669	0.344234	Others
FBgn0032358	Ppt2	34564	Promoter (<=1kb)	0	chr2L	11280139	11280325	187	577.525	4.10745	109	1	11280298	11281920	1623	1	FBtr0080212	Others	Others	Others	Others	Others	Others	Others	Others	Others	Others	NA	-0.0400586	0.802603	Others
FBgn0020270	mre11	34565	Promoter (<=1kb)	0	chr2L	11281914	11282243	330	177.793	3.69592	165	1	11282090	11284335	2246	1	FBtr0080213	Others	Others	Others	Others	Others	Others	Others	Others	Others	Others	NA	2.18594	9.27e-67	Others
FBgn0263874	lncRNA:CR43721	14462743	Distal Intergenic	-5022	chr2L	11302573	11302731	159	310.771	4.10745	121	1	11307753	11308038	286	1	FBtr0329848	Others	Others	Others	Others	Others	Others	Others	Others	Others	Others	NA	NA	NA	Others
FBgn0265794	lncRNA:CR44583	19835566	Distal Intergenic	5051	chr2L	11323995	11324223	229	789.515	4.10745	115	1	11318944	11319259	316	1	FBtr0342587	Others	Others	Others	Others	Others	Others	Others	Others	Others	Others	NA	NA	NA	Others
FBgn0265795	lncRNA:CR44584	19835917	Promoter (<=1kb)	826	chr2L	11331781	11331910	130	141.021	2.35369	69	1	11331889	11332736	848	2	FBtr0342590	Others	Others	Others	Others	Others	Others	Others	Others	Others	Others	NA	NA	NA	Others
FBgn0265796	lncRNA:CR44585	19834933	Promoter (<=1kb)	419	chr2L	11338331	11338501	171	288.509	4.10745	73	1	11338551	11338920	370	2	FBtr0342589	Others	Others	Others	Others	Others	Others	Others	Others	Others	Others	NA	NA	NA	Others
FBgn0263764	lncRNA:CR43681	19835611	Distal Intergenic	7280	chr2L	11384871	11385018	148	205.832	3.64546	61	1	11390111	11392298	2188	2	FBtr0344213	Others	Others	Others	Others	Others	Others	Others	Others	Others	Others	NA	NA	NA	Others
FBgn0263764	lncRNA:CR43681	19835611	Promoter (1-2kb)	-1879	chr2L	11394199	11394432	234	639.019	4.10745	97	1	11387870	11392320	4451	2	FBtr0344212	Others	Others	Others	Others	Others	Others	Others	Others	Others	Others	NA	NA	NA	Others
FBgn0263764	lncRNA:CR43681	19835611	Distal Intergenic	-13217	chr2L	11405537	11405866	330	180.359	3.69088	165	1	11387870	11392320	4451	2	FBtr0344212	Others	Others	Others	Others	Others	Others	Others	Others	Others	Others	NA	NA	NA	Others
FBgn0261648	salm	34569	Distal Intergenic	20023	chr2L	11425508	11425591	84	186.411	3.67879	41	1	11434311	11445614	11304	2	FBtr0089913	Others	Others	Others	Others	Others	Others	Others	Others	Others	Others	Others	0.778202	0.00526178	Others
FBgn0261648	salm	34569	Promoter (<=1kb)	0	chr2L	11445463	11445792	330	169.092	3.34554	165	1	11434311	11445614	11304	2	FBtr0089913	Others	Others	Others	Others	Others	Others	Others	Others	Others	Others	Others	0.778202	0.00526178	Others
FBgn0261648	salm	34569	Distal Intergenic	-7451	chr2L	11453065	11453259	195	331.948	4.10745	78	1	11434311	11445614	11304	2	FBtr0343619	Others	Others	Others	Others	Others	Others	Others	Others	Others	Others	Others	0.778202	0.00526178	Others
FBgn0003313	sala	34570	Distal Intergenic	-12434	chr2L	11472113	11472273	161	229.332	4.10745	78	1	11484707	11486949	2243	1	FBtr0308136	Others	Others	Others	Others	Others	Others	Others	Others	Others	Others	NA	NA	NA	Others
FBgn0003313	sala	34570	Distal Intergenic	-8347	chr2L	11476206	11476360	155	252.004	4.10745	61	1	11484707	11486949	2243	1	FBtr0308136	Others	Others	Others	Others	Others	Others	Others	Others	Others	Others	NA	NA	NA	Others
FBgn0032361	NA	NA	Promoter (<=1kb)	0	chr2L	11498929	11499167	239	450.538	4.10745	116	1	11496804	11498948	2145	2	FBtr0080248	Others	Others	Others	Others	Others	Others	Others	Others	Others	Others	NA	NA	NA	Others
FBgn0032363	Dlg5	34573	Promoter (<=1kb)	0	chr2L	11517052	11517337	286	651.046	4.10745	154	1	11508399	11517081	8683	2	FBtr0080247	Others	Others	Others	Others	Others	Others	Others	Others	Others	Others	NA	0.381307	0.0241381	Others
FBgn0267327	Acp33A	3772154	Promoter (1-2kb)	-1522	chr2L	11593200	11593529	330	189.991	3.67157	165	1	11591339	11591678	340	2	FBtr0080270	Others	Others	Others	Others	Others	Others	Others	Others	Others	Others	NA	NA	NA	Others
FBgn0264994	lncRNA:CR44145	14462746	Promoter (<=1kb)	-177	chr2L	11736112	11736225	114	204.837	3.64735	79	1	11736402	11737541	1140	1	FBtr0335470	Others	Others	Others	Others	Others	Others	Others	Others	Others	Others	NA	NA	NA	Others
FBgn0020309	crol	34592	Promoter (<=1kb)	677	chr2L	11807966	11808295	330	165.369	3.15641	165	1	11795172	11808972	13801	2	FBtr0080262	Others	Others	Others	Others	Others	Others	Others	Others	Others	Others	En	0.681195	1.79e-14	Others
FBgn0020309	crol	34592	Promoter (<=1kb)	0	chr2L	11809382	11809577	196	363.869	4.10745	83	1	11794327	11809438	15112	2	FBtr0080260	Others	Others	Others	Others	Others	Others	Others	Others	Others	Others	En	0.681195	1.79e-14	Others
FBgn0032378	CycY	34593	Promoter (<=1kb)	0	chr2L	11813724	11813823	100	215.53	4.10745	61	1	11810092	11813780	3689	2	FBtr0333425	Others	Others	Others	Others	Others	Others	Others	Others	Others	Others	NA	-0.273229	0.00698824	Others
FBgn0032378	CycY	34593	Promoter (2-3kb)	-2636	chr2L	11816416	11816740	325	1704.98	4.10745	161	1	11810497	11813780	3284	2	FBtr0080259	Others	Others	Others	Others	Others	Others	Others	Others	Others	Others	NA	-0.273229	0.00698824	Others
FBgn0000588	esc	34595	Promoter (<=1kb)	0	chr2L	11829316	11829557	242	825.9	4.10745	115	1	11827204	11829405	2202	2	FBtr0080325	Others	Others	Others	Others	Others	Others	Others	Others	Others	Others	NA	-1.13175	3.96e-06	Others
FBgn0264815	Pde1c	34594	Intron (FBtr0334140/FBgn0264815, intron 3 of 9)	-5866	chr2L	11902644	11902749	106	165.17	3.1568	58	1	11815985	11896778	80794	2	FBtr0334139	Others	Others	Others	Others	Others	Others	Others	Others	Others	Others	NA	1.31017	1.85e-31	Others
FBgn0032385	CG16964	34605	Promoter (<=1kb)	541	chr2L	11948506	11948835	330	224.593	4.10745	165	1	11947965	11948623	659	1	FBtr0080282	Others	Others	Others	Others	Others	Others	Others	Others	Others	Others	NA	NA	NA	Others
FBgn0032385	CG16964	34605	Promoter (2-3kb)	2023	chr2L	11949988	11950213	226	626.546	4.10745	114	1	11947965	11948623	659	1	FBtr0080282	Others	Others	Others	Others	Others	Others	Others	Others	Others	Others	NA	NA	NA	Others
FBgn0263019	lncRNA:CR43314	12798160	Promoter (<=1kb)	0	chr2L	11970897	11971226	330	159.503	2.93202	165	1	11952200	11971094	18895	2	FBtr0306899	Others	Others	Others	Others	Others	Others	Others	Others	Others	Others	NA	NA	NA	Others
FBgn0032387	CG16965	34607	Promoter (1-2kb)	-1268	chr2L	11980175	11980323	149	213.155	3.63053	108	1	11981591	11984380	2790	1	FBtr0310149	Others	Others	Others	Others	Others	Others	Others	Others	Others	Others	NA	-0.322301	0.33537	Others
FBgn0032388	CG6686	34608	Promoter (<=1kb)	0	chr2L	11987923	11988252	330	215.959	4.10745	165	1	11984327	11988039	3713	2	FBtr0089572	Others	Others	Others	Others	Others	Others	Others	Others	Others	Others	NA	0.693032	3.92e-17	Others
FBgn0032390	dgt2	34610	Promoter (<=1kb)	0	chr2L	11989887	11989973	87	276.525	4.10745	78	1	11989936	11990834	899	1	FBtr0080285	Others	Others	Others	Others	Others	Others	Others	Others	Others	Others	NA	0.534133	0.0782907	Others
FBgn0032394	Hacd1	34614	Promoter (<=1kb)	-594	chr2L	12002860	12003189	330	248.18	4.10745	165	1	12001234	12002266	1033	2	FBtr0080313	Others	Others	Others	Others	Others	Others	Others	Others	Others	Others	NA	-0.489701	1e-20	Others
FBgn0032394	Hacd1	34614	Promoter (1-2kb)	-1912	chr2L	12004178	12004442	265	578.454	4.10745	135	1	12001234	12002266	1033	2	FBtr0080313	Others	Others	Others	Others	Others	Others	Others	Others	Others	Others	NA	-0.489701	1e-20	Others
FBgn0014019	Rh5	34615	Promoter (1-2kb)	-1336	chr2L	12006604	12006817	214	363.794	4.10745	62	1	12008153	12009832	1680	1	FBtr0342591	Others	Others	Others	Others	Others	Others	Others	Others	Others	Others	NA	1.6792	7.44e-23	Others
FBgn0014019	Rh5	34615	Promoter (<=1kb)	-396	chr2L	12007649	12007757	109	419.643	4.10745	5	1	12008153	12009832	1680	1	FBtr0342591	Others	Others	Others	Others	Others	Others	Others	Others	Others	Others	NA	1.6792	7.44e-23	Others
FBgn0014019	Rh5	34615	Promoter (2-3kb)	2160	chr2L	12010538	12010867	330	207.863	3.64091	165	1	12008378	12009832	1455	1	FBtr0080291	Others	Others	Others	Others	Others	Others	Others	Others	Others	Others	NA	1.6792	7.44e-23	Others
FBgn0265799	lncRNA:CR44588	19835784	Promoter (2-3kb)	-2083	chr2L	12011130	12011445	316	1088.82	4.10745	147	1	12013528	12013899	372	1	FBtr0342592	Others	Others	Others	Others	Others	Others	Others	Others	Others	Others	NA	NA	NA	Others
FBgn0265799	lncRNA:CR44588	19835784	Promoter (1-2kb)	-1072	chr2L	12012229	12012456	228	649.343	4.10745	127	1	12013528	12013899	372	1	FBtr0342592	Others	Others	Others	Others	Others	Others	Others	Others	Others	Others	NA	NA	NA	Others
FBgn0032395	Wdr81	34616	Promoter (<=1kb)	-319	chr2L	12021279	12021470	192	465.164	4.10745	114	1	12014304	12020960	6657	2	FBtr0080312	Others	Others	Others	Others	Others	Others	Others	Others	Others	Others	NA	0.191368	0.523382	Others
FBgn0265798	lncRNA:CR44587	19835170	Promoter (<=1kb)	-363	chr2L	12025565	12025894	330	178.107	3.69539	165	1	12024056	12025202	1147	2	FBtr0342597	Others	Others	Others	Others	Others	Others	Others	Others	Others	Others	NA	NA	NA	Others
FBgn0010497	dmGlut	47253	Promoter (<=1kb)	-552	chr2L	12026583	12026886	304	536.511	4.10745	105	1	12027438	12034122	6685	1	FBtr0080292	Others	Others	Others	Others	Others	Others	Others	Others	Others	Others	NA	-0.701918	2.8e-21	Others
FBgn0032399	CG6785	34620	Promoter (<=1kb)	-263	chr2L	12044612	12044849	238	708.727	4.10745	121	1	12041054	12044349	3296	2	FBtr0342595	Others	Others	Others	Others	Others	Others	Others	Others	Others	Others	NA	-0.497566	0.00055421	Others
FBgn0032399	CG6785	34620	Promoter (<=1kb)	205	chr2L	12044836	12044995	160	150.274	2.57828	101	1	12041054	12045200	4147	2	FBtr0080307	Others	Others	Others	Others	Others	Others	Others	Others	Others	Others	NA	-0.497566	0.00055421	Others
FBgn0265800	lncRNA:CR44589	19835932	Promoter (<=1kb)	178	chr2L	12046620	12046825	206	562.377	4.10745	124	1	12046442	12046679	238	1	FBtr0342593	Others	Others	Others	Others	Others	Others	Others	Others	Others	Others	NA	NA	NA	Others
FBgn0027505	Rab3-GAP	34626	Promoter (<=1kb)	-67	chr2L	12063251	12063360	110	371.665	4.10745	39	1	12058304	12063184	4881	2	FBtr0080302	Others	Others	Others	Others	Others	Others	Others	Others	Others	Others	NA	0.0876037	0.654904	Others
FBgn0032407	Pex19	34630	Promoter (<=1kb)	0	chr2L	12093631	12093825	195	534.444	4.10745	119	1	12093762	12095250	1489	1	FBtr0080326	Others	Others	Others	Others	Others	Others	Others	Others	Others	Others	NA	-0.860843	3.68e-37	Others
FBgn0028707	Mt2	34632	Promoter (<=1kb)	0	chr2L	12096365	12096694	330	204.96	3.64709	165	1	12096525	12097687	1163	1	FBtr0110911	Others	Others	Others	Others	Others	Others	Others	Others	Others	Others	NA	-0.526003	0.0925686	Others
FBgn0032409	Ced-12	34633	Promoter (<=1kb)	0	chr2L	12097799	12097882	84	199.037	3.65702	28	1	12097838	12100839	3002	1	FBtr0080330	Others	Others	Others	Others	Others	Others	Others	Others	Others	Others	NA	-0.258159	0.0515074	Others
FBgn0027081	ThrRS	45784	Promoter (<=1kb)	0	chr2L	12103525	12103785	261	420.489	4.10745	133	1	12103751	12106894	3144	1	FBtr0080331	Mitochondria	Others	Others	RNA_metabolism_mito	Others	Others	Others	Others	Others	Others	NA	0.0729112	0.147879	Mito_EBR
FBgn0032421	crok	34646	Promoter (<=1kb)	0	chr2L	12172839	12173068	230	443.278	4.10745	115	1	12172981	12174091	1111	1	FBtr0080342	Others	Others	Others	Others	Others	Others	Others	Others	Others	Others	NA	-0.405055	0.000359298	Others
FBgn0263088	lncRNA:CR43356	12798164	Promoter (<=1kb)	0	chr2L	12174545	12174795	251	405.324	4.10745	116	1	12174090	12174638	549	2	FBtr0307106	Others	Others	Others	Others	Others	Others	Others	Others	Others	Others	NA	NA	NA	Others
FBgn0266820	lncRNA:CR45282	19835860	Promoter (1-2kb)	1066	chr2L	12314965	12315056	92	190.907	3.66991	77	1	12315777	12316122	346	2	FBtr0345546	Others	Others	Others	Others	Others	Others	Others	Others	Others	Others	NA	NA	NA	Others
FBgn0051862	CG31862	318989	Promoter (1-2kb)	-1436	chr2L	12337303	12337412	110	162.099	3.02854	88	1	12338848	12339477	630	1	FBtr0080350	Others	Others	Others	Others	Others	Others	Others	Others	Others	Others	NA	NA	NA	Others
FBgn0262475	bru2	250811	Promoter (1-2kb)	-1302	chr2L	12346110	12346439	330	156.729	2.89476	165	1	12347741	12397528	49788	1	FBtr0332232	Others	Others	Others	Others	Others	Others	Others	Others	Others	Others	NA	0.102334	0.458941	Others
FBgn0262475	bru2	250811	Promoter (2-3kb)	2852	chr2L	12350969	12351218	250	749.554	4.10745	149	1	12348117	12397528	49412	1	FBtr0332234	Others	Others	Others	Others	Others	Others	Others	Others	Others	Others	NA	0.102334	0.458941	Others
FBgn0032424	CG17010	34650	Promoter (2-3kb)	-2163	chr2L	12353949	12354278	330	169.223	3.34526	165	1	12356441	12357906	1466	1	FBtr0080354	Others	Others	Others	Others	Others	Others	Others	Others	Others	Others	NA	0.293407	0.876093	Others
FBgn0262475	bru2	250811	Promoter (<=1kb)	-63	chr2L	12365974	12366303	330	263.003	4.10745	165	1	12366366	12397528	31163	1	FBtr0304861	Others	Others	Others	Others	Others	Others	Others	Others	Others	Others	NA	0.102334	0.458941	Others
FBgn0262475	bru2	250811	Promoter (1-2kb)	1990	chr2L	12371826	12372051	226	610.457	4.10745	109	1	12369836	12397528	27693	1	FBtr0304864	Others	Others	Others	Others	Others	Others	Others	Others	Others	Others	NA	0.102334	0.458941	Others
FBgn0262475	bru2	250811	Promoter (2-3kb)	2748	chr2L	12372584	12372686	103	178.433	3.69446	74	1	12369836	12397528	27693	1	FBtr0304864	Others	Others	Others	Others	Others	Others	Others	Others	Others	Others	NA	0.102334	0.458941	Others
FBgn0032428	CG6405	34654	Promoter (<=1kb)	-73	chr2L	12424635	12424831	197	478.556	4.10745	109	1	12424904	12426440	1537	1	FBtr0080366	Others	Others	Others	Others	Others	Others	Others	Others	Others	Others	NA	2.13942	0.000292915	Others
FBgn0032430	CG6388	34656	Promoter (<=1kb)	0	chr2L	12427920	12428249	330	188.532	3.67501	165	1	12428028	12430021	1994	1	FBtr0080367	Others	Others	Others	Others	Others	Others	Others	Others	Others	Others	NA	-0.794012	3.64e-13	Others
FBgn0265298	SC35	53444	Promoter (<=1kb)	0	chr2L	12433950	12434112	163	382.611	4.10745	52	1	12431075	12434038	2964	2	FBtr0302910	Others	Others	Others	Others	Others	Others	Others	Others	Others	Others	NA	-0.876113	8.4e-52	Others
FBgn0265298	SC35	53444	Promoter (<=1kb)	0	chr2L	12434476	12434805	330	240.502	4.10745	165	1	12431878	12434665	2788	2	FBtr0089898	Others	Others	Others	Others	Others	Others	Others	Others	Others	Others	NA	-0.876113	8.4e-52	Others
FBgn0259176	bun	34665	Promoter (<=1kb)	0	chr2L	12461244	12461573	330	204.314	3.648	165	1	12457138	12461256	4119	2	FBtr0299657	Others	Others	Others	Others	Others	Others	Others	Others	Others	Others	Others	0.949903	9.44e-78	Others
FBgn0259176	bun	34665	Promoter (1-2kb)	-1795	chr2L	12463051	12463380	330	237.343	4.10745	165	1	12457138	12461256	4119	2	FBtr0299657	Others	Others	Others	Others	Others	Others	Others	Others	Others	Others	Others	0.949903	9.44e-78	Others
FBgn0259176	bun	34665	Promoter (<=1kb)	-228	chr2L	12483817	12484081	265	1085.58	4.10745	148	1	12456577	12483589	27013	2	FBtr0299656	Others	Others	Others	Others	Others	Others	Others	Others	Others	Others	Others	0.949903	9.44e-78	Others
FBgn0259176	bun	34665	Intron (FBtr0299652/FBgn0259176, intron 1 of 2)	-3830	chr2L	12487419	12487523	105	302.99	4.10745	86	1	12456577	12483589	27013	2	FBtr0299656	Others	Others	Others	Others	Others	Others	Others	Others	Others	Others	Others	0.949903	9.44e-78	Others
FBgn0051858	t-cup	318986	Promoter (<=1kb)	-399	chr2L	12497732	12497914	183	393.857	4.10745	88	1	12496616	12497333	718	2	FBtr0080381	Others	Others	Others	Others	Others	Others	Others	Others	Others	Others	NA	NA	NA	Others
FBgn0051858	t-cup	318986	Promoter (1-2kb)	-1244	chr2L	12498577	12498906	330	176.411	3.47692	165	1	12496616	12497333	718	2	FBtr0080381	Others	Others	Others	Others	Others	Others	Others	Others	Others	Others	NA	NA	NA	Others
FBgn0263458	snoRNA:CG43051-a	12798169	Promoter (1-2kb)	1496	chr2L	12509604	12509716	113	157.762	2.93612	37	1	12508108	12508254	147	1	FBtr0309757	Others	Others	Others	Others	Others	Others	Others	Others	Others	Others	NA	NA	NA	Others
FBgn0263458	snoRNA:CG43051-a	12798169	Intron (FBtr0300523/FBgn0259176, intron 5 of 6)	12194	chr2L	12520302	12520631	330	230.474	4.10745	165	1	12508108	12508254	147	1	FBtr0309757	Others	Others	Others	Others	Others	Others	Others	Others	Others	Others	NA	NA	NA	Others
FBgn0259176	bun	34665	Intron (FBtr0300523/FBgn0259176, intron 5 of 6)	4857	chr2L	12535716	12536045	330	322.74	4.10745	165	1	12456577	12540902	84326	2	FBtr0346622	Others	Others	Others	Others	Others	Others	Others	Others	Others	Others	Others	0.949903	9.44e-78	Others
FBgn0259176	bun	34665	Promoter (<=1kb)	0	chr2L	12546607	12546863	257	552.206	4.10745	120	1	12455540	12546611	91072	2	FBtr0300523	Others	Others	Others	Others	Others	Others	Others	Others	Others	Others	Others	0.949903	9.44e-78	Others
FBgn0085424	nub	34669	Promoter (1-2kb)	1305	chr2L	12588930	12589259	330	151.334	2.61651	165	1	12587625	12628135	40511	1	FBtr0112642	Others	Others	Others	Others	Others	Others	Others	Others	Others	Others	Others	0.937199	1.2e-13	Others
FBgn0004394	pdm2	34673	Intron (FBtr0340540/FBgn0004394, intron 4 of 4)	3227	chr2L	12681831	12682160	330	160.162	2.97877	165	1	12678604	12686306	7703	1	FBtr0080393	Others	Others	Others	Others	Others	Others	Others	Others	Others	Others	Others	0.079536	0.823389	Others
FBgn0032445	CG6153	34675	Promoter (<=1kb)	0	chr2L	12692943	12693046	104	455.099	4.10745	29	1	12692993	12693892	900	1	FBtr0080394	Others	Others	Others	Others	Others	Others	Others	Others	Others	Others	NA	-0.522765	0.00354185	Others
FBgn0032450	CG5776	34680	Promoter (<=1kb)	0	chr2L	12704447	12704727	281	831.311	4.10745	137	1	12700949	12704451	3503	2	FBtr0329925	Others	Others	Others	Others	Others	Others	Others	Others	Others	Others	NA	-0.850221	5.6e-05	Others
FBgn0032452	CG15484	34682	Promoter (<=1kb)	-24	chr2L	12707735	12707819	85	217.386	4.10745	35	1	12706799	12707711	913	2	FBtr0080406	Others	Others	Others	Others	Others	Others	Others	Others	Others	Others	NA	1.25337	0.440826	Others
FBgn0032454	CG5787	34684	Promoter (<=1kb)	0	chr2L	12712414	12712573	160	393.511	4.10745	82	1	12708792	12712470	3679	2	FBtr0080405	Others	Others	Others	Others	Others	Others	Others	Others	Others	Others	NA	-0.966337	8.53e-12	Others
FBgn0032455	Pih1D1	34685	Promoter (<=1kb)	519	chr2L	12720995	12721324	330	208.418	3.63998	165	1	12713276	12721843	8568	2	FBtr0089908	Others	Others	Others	Others	Others	Others	Others	Others	Others	Others	NA	0.47576	1.55e-05	Others
FBgn0032456	MRP	34686	Promoter (<=1kb)	-23	chr2L	12721925	12722250	326	537.042	4.10745	152	1	12722273	12744807	22535	1	FBtr0090013	Others	Others	Others	Others	Others	Others	Others	Others	Others	Others	NA	0.422842	3.52e-12	Others
FBgn0263598	Vha68-2	45012	Promoter (<=1kb)	-47	chr2L	12974075	12974275	201	542.556	4.10745	122	1	12974322	12978607	4286	1	FBtr0336614	Others	Others	Others	Others	Others	Others	Others	Others	Others	Others	NA	-0.951977	5.93e-183	Others
FBgn0028965	A16	34700	Promoter (<=1kb)	0	chr2L	13021179	13021476	298	702.833	4.10745	165	1	13019575	13021312	1738	2	FBtr0080427	Others	Others	Others	Others	Others	Others	Others	Others	Others	Others	NA	-0.150315	0.256333	Others
FBgn0265086	lncRNA:CR44197	14462756	Distal Intergenic	-5866	chr2L	13083717	13083937	221	709.841	4.10745	121	1	13089803	13090559	757	1	FBtr0336854	Others	Others	Others	Others	Others	Others	Others	Others	Others	Others	NA	NA	NA	Others
FBgn0265088	lncRNA:CR44199	14462758	Promoter (1-2kb)	-1332	chr2L	13145147	13145304	158	189.851	3.67194	99	1	13146636	13146908	273	1	FBtr0336856	Others	Others	Others	Others	Others	Others	Others	Others	Others	Others	NA	NA	NA	Others
FBgn0032482	Pect	34716	Promoter (1-2kb)	1508	chr2L	13205270	13205599	330	185.325	3.68091	165	1	13203762	13210828	7067	1	FBtr0334752	Others	Others	Others	Others	Others	Others	Others	Others	Others	Others	NA	-0.415092	2.4e-11	Others
FBgn0004192	snRNA:U2:34ABb	3771927	Promoter (<=1kb)	133	chr2L	13215972	13216104	133	281.952	4.10745	80	1	13215839	13216030	192	1	FBtr0080443	Others	Others	Others	Others	Others	Others	Others	Others	Others	Others	NA	NA	NA	Others
FBgn0032485	CG9426	34719	Promoter (<=1kb)	0	chr2L	13219871	13220032	162	334.3	4.10745	82	1	13216290	13219923	3634	2	FBtr0080484	Others	Others	Others	Others	Others	Others	Others	Others	Others	Others	NA	0.108735	0.419192	Others
FBgn0032487	Ski6	34721	Promoter (<=1kb)	0	chr2L	13222422	13222533	112	276.348	4.10745	100	1	13221397	13222429	1033	2	FBtr0334755	Others	Others	Others	Others	Others	Others	Others	Others	Others	Others	NA	-1.0504	6.94e-05	Others
FBgn0051730	CG31730	318920	Promoter (<=1kb)	778	chr2L	13258818	13258965	148	223.138	4.10745	89	1	13259064	13259743	680	2	FBtr0080480	Others	Others	Others	Others	Others	Others	Others	Others	Others	Others	NA	NA	NA	Others
FBgn0051729	CG31729	34736	Promoter (<=1kb)	269	chr2L	13290266	13290526	261	734.11	4.10745	141	1	13289997	13301516	11520	1	FBtr0080461	Others	Others	Others	Others	Others	Others	Others	Others	Others	Others	NA	-0.179799	0.0551717	Others
FBgn0051729	CG31729	34736	Promoter (<=1kb)	123	chr2L	13291033	13291362	330	178.776	3.69393	165	1	13290910	13301516	10607	1	FBtr0344851	Others	Others	Others	Others	Others	Others	Others	Others	Others	Others	NA	-0.179799	0.0551717	Others
FBgn0051855	CG31855	318983	Promoter (<=1kb)	0	chr2L	13369055	13369239	185	456.002	4.10745	93	1	13369204	13370329	1126	1	FBtr0080467	Others	Others	Others	Others	Others	Others	Others	Others	Others	Others	NA	-0.546537	0.000981829	Others
FBgn0032511	ND-B22	34747	Promoter (<=1kb)	0	chr2L	13370986	13371127	142	286.322	4.10745	65	1	13370103	13371026	924	2	FBtr0080472	Mitochondria	Others	Others	Others	Others	ETC	Others	Others	Others	Others	NA	-1.38664	4.48e-127	Mito_EBR
FBgn0032513	CG6565	34749	Promoter (<=1kb)	0	chr2L	13373961	13374205	245	441.919	4.10745	131	1	13374019	13376165	2147	1	FBtr0342631	Mitochondria	Others	Others	Others	Others	Others	Others	Others	Others	Others	NA	-1.28799	6.07e-32	MitoOthers
FBgn0032516	Ing5	34752	Promoter (<=1kb)	0	chr2L	13387272	13387596	325	425.097	4.10745	99	1	13385848	13387312	1465	2	FBtr0080525	Others	Others	Others	Others	Others	Others	Others	Others	Others	Others	NA	0.308123	0.134733	Others
FBgn0032518	RpL24	34754	Promoter (<=1kb)	0	chr2L	13394987	13395289	303	752.897	4.10745	157	1	13393687	13395092	1406	2	FBtr0342637	Others	Others	Others	Others	Others	Others	Others	Others	Others	Others	NA	-0.548472	1.19e-30	Others
FBgn0032521	CG7110	34757	Promoter (<=1kb)	0	chr2L	13398841	13399041	201	662.471	4.10745	110	1	13398991	13410955	11965	1	FBtr0345438	Others	Others	Others	Others	Others	Others	Others	Others	Others	Others	NA	2.19663	9.53e-89	Others
FBgn0263354	CG42784	326165	Promoter (<=1kb)	-236	chr2L	13414866	13415195	330	304.586	4.10745	165	1	13415431	13500427	84997	1	FBtr0308949	Others	Others	Others	Others	Others	Others	Others	Others	Others	Others	NA	1.77828	4.92e-05	Others
FBgn0032524	Hacd2	34762	Promoter (<=1kb)	0	chr2L	13445597	13445822	226	743.972	4.10745	85	1	13444103	13445651	1549	2	FBtr0080519	Others	Others	Others	Others	Others	Others	Others	Others	Others	Others	NA	-0.843975	1.2e-21	Others
FBgn0053640	CG33640	3772680	Intron (FBtr0332509/FBgn0023407, intron 4 of 6)	-15463	chr2L	13512222	13512378	157	298.041	4.10745	69	1	13527841	13528537	697	1	FBtr0332506	Others	Others	Others	Others	Others	Others	Others	Others	Others	Others	NA	0.520229	0.450693	Others
FBgn0053640	CG33640	3772680	Intron (FBtr0332509/FBgn0023407, intron 3 of 6)	-14051	chr2L	13513553	13513790	238	486.795	4.10745	119	1	13527841	13528537	697	1	FBtr0332506	Others	Others	Others	Others	Others	Others	Others	Others	Others	Others	NA	0.520229	0.450693	Others
FBgn0053640	CG33640	3772680	Intron (FBtr0332509/FBgn0023407, intron 3 of 6)	-13012	chr2L	13514589	13514829	241	551.584	4.10745	123	1	13527841	13528537	697	1	FBtr0332506	Others	Others	Others	Others	Others	Others	Others	Others	Others	Others	NA	0.520229	0.450693	Others
FBgn0053640	CG33640	3772680	Intron (FBtr0332509/FBgn0023407, intron 3 of 6)	-12573	chr2L	13515052	13515268	217	430.667	4.10745	109	1	13527841	13528537	697	1	FBtr0332506	Others	Others	Others	Others	Others	Others	Others	Others	Others	Others	NA	0.520229	0.450693	Others
FBgn0023407	B4	34767	Promoter (<=1kb)	-18	chr2L	13549346	13549427	82	364.353	4.10745	18	1	13502656	13549328	46673	2	FBtr0080513	Others	Others	Others	Others	Others	Others	Others	Others	Others	Others	NA	1.1333	8.82e-11	Others
FBgn0259984	kuz	34772	Promoter (<=1kb)	0	chr2L	13550036	13550191	156	423.241	4.10745	85	1	13550139	13636995	86857	1	FBtr0342903	Others	Others	Others	Others	Others	Others	Others	Others	Others	Others	NA	0.637595	2.17e-07	Others
FBgn0028540	CG9008	34779	Promoter (1-2kb)	1175	chr2L	13778661	13778990	330	236.171	4.10745	165	1	13774340	13780165	5826	2	FBtr0080576	Others	Others	Others	Others	Others	Others	Others	Others	Others	Others	NA	0.410786	1.8e-10	Others
FBgn0024846	p38b	34780	Promoter (<=1kb)	0	chr2L	13780539	13780868	330	254.61	4.10745	165	1	13780689	13782611	1923	1	FBtr0080534	Others	Others	Others	Others	Others	Others	Others	Others	Others	Others	NA	-0.159292	0.0165885	Others
FBgn0004407	DNApol-gamma35	3772064	Promoter (<=1kb)	0	chr2L	13833088	13833288	201	421.173	4.10745	154	1	13831482	13833105	1624	2	FBtr0091627	Mitochondria	mtDNA_replication	Others	Others	Others	Others	Others	Others	Others	Others	NA	NA	NA	Mito_EBR
FBgn0028509	CenG1A	34803	Promoter (<=1kb)	0	chr2L	13835286	13835653	368	7135.64	4.10745	168	1	13835564	13898712	63149	1	FBtr0080546	Others	Others	Others	Others	Others	Others	Others	Others	Others	Others	NA	1.3203	8.56e-28	Others
FBgn0053307	CG33307	2768914	Promoter (2-3kb)	2509	chr2L	13838682	13839011	330	267.448	4.10745	165	1	13839262	13841520	2259	2	FBtr0343672	Others	Others	Others	Others	Others	Others	Others	Others	Others	Others	NA	-1.38574	8.1e-34	Others
FBgn0053307	CG33307	2768914	Promoter (1-2kb)	1502	chr2L	13839689	13840018	330	162.555	3.02724	165	1	13839262	13841520	2259	2	FBtr0343672	Others	Others	Others	Others	Others	Others	Others	Others	Others	Others	NA	-1.38574	8.1e-34	Others
FBgn0019890	Smg5	34804	Promoter (<=1kb)	0	chr2L	13904303	13904886	584	6941.4	4.10745	326	1	13898828	13904476	5649	2	FBtr0080562	Others	Others	Others	Others	Others	Others	Others	Others	Others	Others	NA	0.928948	1.45e-19	Others
FBgn0001967	NimC3	48772	Promoter (<=1kb)	-646	chr2L	14020854	14021155	302	961.016	4.10745	117	1	14019357	14020208	852	2	FBtr0290243	Others	Others	Others	Others	Others	Others	Others	Others	Others	Others	NA	NA	NA	Others
FBgn0266892	lncRNA:CR45352	19835001	Promoter (<=1kb)	0	chr2L	14021730	14022059	330	179.135	3.6934	165	1	14021583	14022033	451	2	FBtr0345759	Others	Others	Others	Others	Others	Others	Others	Others	Others	Others	NA	NA	NA	Others
FBgn0266892	lncRNA:CR45352	19835001	Promoter (<=1kb)	-211	chr2L	14022244	14022485	242	361.622	4.10745	242	1	14021583	14022033	451	2	FBtr0345759	Others	Others	Others	Others	Others	Others	Others	Others	Others	Others	NA	NA	NA	Others
FBgn0051840	lncRNA:CR31840	19835558	Promoter (<=1kb)	429	chr2L	14023515	14023670	156	153.009	2.70796	62	1	14023722	14024099	378	2	FBtr0345758	Others	Others	Others	Others	Others	Others	Others	Others	Others	Others	NA	NA	NA	Others
FBgn0051840	lncRNA:CR31840	19835558	Promoter (<=1kb)	0	chr2L	14023925	14024358	434	4206.19	4.10745	161	1	14023722	14024099	378	2	FBtr0345758	Others	Others	Others	Others	Others	Others	Others	Others	Others	Others	NA	NA	NA	Others
FBgn0260011	NimC4	34824	Promoter (<=1kb)	-85	chr2L	14047219	14047497	279	1271.11	4.10745	147	1	14047582	14048863	1282	1	FBtr0080592	Others	Others	Others	Others	Others	Others	Others	Others	Others	Others	NA	6.04749	0.0541349	Others
FBgn0283651	CG46301	34829	Distal Intergenic	-9159	chr2L	14094723	14094931	209	360.896	4.10745	105	1	14104090	14106791	2702	1	FBtr0445731	Others	Others	Others	Others	Others	Others	Others	Others	Others	Others	NA	1.43573	0.0013261	Others
FBgn0283651	CG46301	34829	Intron (FBtr0445730/FBgn0283651, intron 4 of 7)	-11439	chr2L	14122835	14123033	199	328.8	4.10745	114	1	14134472	14160587	26116	1	FBtr0445729	Others	Others	Others	Others	Others	Others	Others	Others	Others	Others	NA	1.43573	0.0013261	Others
FBgn0283651	CG46301	34829	Intron (FBtr0445730/FBgn0283651, intron 4 of 7)	-10559	chr2L	14123584	14123913	330	212.706	3.63127	165	1	14134472	14160587	26116	1	FBtr0445729	Others	Others	Others	Others	Others	Others	Others	Others	Others	Others	NA	1.43573	0.0013261	Others
FBgn0283651	CG46301	34829	Intron (FBtr0445730/FBgn0283651, intron 4 of 7)	6881	chr2L	14141353	14141519	167	248.74	4.10745	63	1	14134472	14160587	26116	1	FBtr0445729	Others	Others	Others	Others	Others	Others	Others	Others	Others	Others	NA	1.43573	0.0013261	Others
FBgn0016930	Dyrk2	34831	Intron (FBtr0100447/FBgn0016930, intron 2 of 10)	7907	chr2L	14226087	14226201	115	257.349	4.10745	76	1	14184478	14234108	49631	2	FBtr0100447	Others	Others	Others	Others	Others	Others	Others	Others	Others	Others	NA	0.443612	0.00385391	Others
FBgn0016930	Dyrk2	34831	Promoter (<=1kb)	0	chr2L	14233910	14234239	330	261.047	4.10745	165	1	14184478	14234108	49631	2	FBtr0100447	Others	Others	Others	Others	Others	Others	Others	Others	Others	Others	NA	0.443612	0.00385391	Others
FBgn0265941	lncRNA:CR44728	19835341	Promoter (<=1kb)	951	chr2L	14236269	14236359	91	212.796	3.631	79	1	14235318	14236307	990	1	FBtr0342908	Others	Others	Others	Others	Others	Others	Others	Others	Others	Others	NA	NA	NA	Others
FBgn0265941	lncRNA:CR44728	19835341	Promoter (2-3kb)	2136	chr2L	14237454	14237783	330	163.951	3.15894	165	1	14235318	14236307	990	1	FBtr0342908	Others	Others	Others	Others	Others	Others	Others	Others	Others	Others	NA	NA	NA	Others
FBgn0265147	lncRNA:CR44216	14462763	Distal Intergenic	4411	chr2L	14245555	14245788	234	736.872	4.10745	98	1	14241144	14241732	589	1	FBtr0336992	Others	Others	Others	Others	Others	Others	Others	Others	Others	Others	NA	NA	NA	Others
FBgn0263648	lncRNA:CR43639	14462764	Exon (FBtr0305063/FBgn0261563, exon 4 of 13)	-3040	chr2L	14288075	14288161	87	257.724	4.10745	44	1	14291201	14291817	617	1	FBtr0310011	Others	Others	Others	Others	Others	Others	Others	Others	Others	Others	NA	NA	NA	Others
FBgn0261563	wb	43946	Intron (FBtr0305063/FBgn0261563, intron 4 of 12)	6638	chr2L	14307637	14307829	193	385.713	4.10745	101	1	14300999	14328262	27264	1	FBtr0302735	Others	Others	Others	Others	Others	Others	Others	Others	Others	Others	NA	-0.0014193	0.989366	Others
FBgn0028530	mTTF	34837	Promoter (<=1kb)	0	chr2L	14348751	14348933	183	505.209	4.10745	82	1	14347239	14348790	1552	2	FBtr0080641	Mitochondria	Others	Transcription_mito	RNA_metabolism_mito	Others	Others	Others	Others	Others	Others	NA	-0.471307	0.000160743	Mito_EBR
FBgn0015791	Rab14	34840	Promoter (<=1kb)	0	chr2L	14355039	14355258	220	528.363	4.10745	127	1	14355145	14358345	3201	1	FBtr0080626	Others	Others	Others	Others	Others	Others	Others	Others	Others	Others	NA	0.602781	4.06e-14	Others
FBgn0015791	Rab14	34840	Promoter (<=1kb)	487	chr2L	14355632	14355840	209	514.457	4.10745	87	1	14355145	14358345	3201	1	FBtr0080626	Others	Others	Others	Others	Others	Others	Others	Others	Others	Others	NA	0.602781	4.06e-14	Others
FBgn0001970	Pgant35A	48775	Promoter (<=1kb)	0	chr2L	14359086	14359264	179	345.395	4.10745	88	1	14359252	14361411	2160	1	FBtr0080629	Others	Others	Others	Others	Others	Others	Others	Others	Others	Others	NA	-0.581356	0.185394	Others
FBgn0015546	spel1	34842	Promoter (<=1kb)	0	chr2L	14361973	14362117	145	280.33	4.10745	71	1	14362069	14365568	3500	1	FBtr0080630	Others	Others	Others	Others	Others	Others	Others	Others	Others	Others	NA	0.356277	0.0906649	Others
FBgn0015546	spel1	34842	Downstream (<=300bp)	5042	chr2L	14367111	14367440	330	186.274	3.67916	165	1	14362069	14366840	4772	1	FBtr0344019	Others	Others	Others	Others	Others	Others	Others	Others	Others	Others	NA	0.356277	0.0906649	Others
FBgn0015546	spel1	34842	Distal Intergenic	7945	chr2L	14370014	14370197	184	390.357	4.10745	80	1	14362069	14366840	4772	1	FBtr0344019	Others	Others	Others	Others	Others	Others	Others	Others	Others	Others	NA	0.356277	0.0906649	Others
FBgn0020258	ppk	34843	Distal Intergenic	8563	chr2L	14372389	14372609	221	568.134	4.10745	99	1	14378218	14381172	2955	2	FBtr0080638	Others	Others	Others	Others	Others	Others	Others	Others	Others	Others	NA	1.30503	1.46e-30	Others
FBgn0020258	ppk	34843	Distal Intergenic	4010	chr2L	14376833	14377162	330	218.661	4.10745	165	1	14378218	14381172	2955	2	FBtr0080638	Others	Others	Others	Others	Others	Others	Others	Others	Others	Others	NA	1.30503	1.46e-30	Others
FBgn0020258	ppk	34843	Intron (FBtr0080637/FBgn0004858, intron 1 of 2)	-13369	chr2L	14394541	14394695	155	263.951	4.10745	81	1	14378218	14381172	2955	2	FBtr0080638	Others	Others	Others	Others	Others	Others	Others	Others	Others	Others	NA	1.30503	1.46e-30	Others
FBgn0004858	elB	34844	Intron (FBtr0080637/FBgn0004858, intron 1 of 2)	4153	chr2L	14405067	14405396	330	169.622	3.34448	165	1	14390628	14409549	18922	2	FBtr0080637	Others	Others	Others	Others	Others	Others	Others	Others	Others	Others	Others	0.927641	1.07e-17	Others
FBgn0267290	lncRNA:CR45726	19836223	Distal Intergenic	7835	chr2L	14441026	14441174	149	285.211	4.10745	75	1	14448409	14449009	601	2	FBtr0346575	Others	Others	Others	Others	Others	Others	Others	Others	Others	Others	NA	NA	NA	Others
FBgn0265943	lncRNA:CR44730	19835600	Promoter (1-2kb)	1131	chr2L	14458244	14458437	194	327.555	4.10745	91	1	14457113	14457338	226	1	FBtr0342911	Others	Others	Others	Others	Others	Others	Others	Others	Others	Others	NA	NA	NA	Others
FBgn0265943	lncRNA:CR44730	19835600	Distal Intergenic	4015	chr2L	14461128	14461396	269	1131.57	4.10745	133	1	14457113	14457338	226	1	FBtr0342911	Others	Others	Others	Others	Others	Others	Others	Others	Others	Others	NA	NA	NA	Others
FBgn0265943	lncRNA:CR44730	19835600	Distal Intergenic	5574	chr2L	14462687	14462882	196	320.506	4.10745	75	1	14457113	14457338	226	1	FBtr0342911	Others	Others	Others	Others	Others	Others	Others	Others	Others	Others	NA	NA	NA	Others
FBgn0265944	lncRNA:CR44731	19836201	Distal Intergenic	-10804	chr2L	14475110	14475236	127	194.258	3.66567	45	1	14486040	14486752	713	1	FBtr0342912	Others	Others	Others	Others	Others	Others	Others	Others	Others	Others	NA	NA	NA	Others
FBgn0005771	noc	34847	Promoter (<=1kb)	0	chr2L	14490709	14491038	330	211.929	3.63296	165	1	14490859	14493833	2975	1	FBtr0342913	Others	Others	Others	Others	Others	Others	Others	Others	Others	Others	Others	0.234071	0.0566413	Others
FBgn0028882	tRNA:Pro-AGG-1-1	3772076	Promoter (<=1kb)	-27	chr2L	14495522	14495851	330	187.328	3.67703	165	1	14495878	14495949	72	1	FBtr0080644	Others	Others	Others	Others	Others	Others	Others	Others	Others	Others	NA	NA	NA	Others
FBgn0266841	lncRNA:CR45303	19836080	Promoter (<=1kb)	-989	chr2L	14499105	14499434	330	310.021	4.10745	165	1	14496997	14498116	1120	2	FBtr0345569	Others	Others	Others	Others	Others	Others	Others	Others	Others	Others	NA	NA	NA	Others
FBgn0266841	lncRNA:CR45303	19836080	Promoter (2-3kb)	-2376	chr2L	14500492	14500706	215	575.458	4.10745	129	1	14496997	14498116	1120	2	FBtr0345569	Others	Others	Others	Others	Others	Others	Others	Others	Others	Others	NA	NA	NA	Others
FBgn0266841	lncRNA:CR45303	19836080	Distal Intergenic	-4503	chr2L	14502619	14502897	279	1757.02	4.10745	149	1	14496997	14498116	1120	2	FBtr0345569	Others	Others	Others	Others	Others	Others	Others	Others	Others	Others	NA	NA	NA	Others
FBgn0267257	lncRNA:CR45693	19835142	Distal Intergenic	6719	chr2L	14505026	14505364	339	1063.39	4.10745	182	1	14509913	14512083	2171	2	FBtr0346471	Others	Others	Others	Others	Others	Others	Others	Others	Others	Others	NA	NA	NA	Others
FBgn0267257	lncRNA:CR45693	19835142	Promoter (<=1kb)	-775	chr2L	14512858	14513148	291	1433.05	4.10745	147	1	14509913	14512083	2171	2	FBtr0346471	Others	Others	Others	Others	Others	Others	Others	Others	Others	Others	NA	NA	NA	Others
FBgn0011862	tRNA:Gly-GCC-1-4	3772279	Promoter (2-3kb)	-2065	chr2L	14515697	14516026	330	206.032	3.64467	165	1	14518091	14518161	71	1	FBtr0089613	Others	Others	Others	Others	Others	Others	Others	Others	Others	Others	NA	NA	NA	Others
FBgn0011864	tRNA:Gly-GCC-1-6	3771867	Promoter (<=1kb)	-671	chr2L	14519362	14519541	180	242.038	4.10745	60	1	14518621	14518691	71	2	FBtr0080665	Others	Others	Others	Others	Others	Others	Others	Others	Others	Others	NA	NA	NA	Others
FBgn0053648	CG33648	3772188	Promoter (2-3kb)	-2594	chr2L	14521582	14521718	137	327.658	4.10745	95	1	14524312	14525656	1345	1	FBtr0343695	Others	Others	Others	Others	Others	Others	Others	Others	Others	Others	NA	NA	NA	Others
FBgn0266146	lncRNA:CR44852	19835882	Distal Intergenic	-6496	chr2L	14539967	14540118	152	199.956	3.65581	84	1	14532484	14533471	988	2	FBtr0343705	Others	Others	Others	Others	Others	Others	Others	Others	Others	Others	NA	NA	NA	Others
FBgn0250844	CG4218	34848	Distal Intergenic	3443	chr2L	14545453	14545666	214	405.645	4.10745	93	1	14547498	14549109	1612	2	FBtr0343704	Others	Others	Others	Others	Others	Others	Others	Others	Others	Others	NA	NA	NA	Others
FBgn0250844	CG4218	34848	Promoter (1-2kb)	1854	chr2L	14546961	14547255	295	1303.44	4.10745	161	1	14547498	14549109	1612	2	FBtr0343704	Others	Others	Others	Others	Others	Others	Others	Others	Others	Others	NA	NA	NA	Others
FBgn0266147	lncRNA:CR44853	19835446	Promoter (1-2kb)	-1284	chr2L	14552244	14552467	224	650.563	4.10745	127	1	14550395	14550960	566	2	FBtr0343702	Others	Others	Others	Others	Others	Others	Others	Others	Others	Others	NA	NA	NA	Others
FBgn0266147	lncRNA:CR44853	19835446	Promoter (2-3kb)	-2993	chr2L	14553953	14554195	243	681.158	4.10745	101	1	14550395	14550960	566	2	FBtr0343702	Others	Others	Others	Others	Others	Others	Others	Others	Others	Others	NA	NA	NA	Others
FBgn0266148	lncRNA:CR44854	19836057	Promoter (1-2kb)	1712	chr2L	14556877	14557140	264	958.841	4.10745	138	1	14557939	14558852	914	2	FBtr0343701	Others	Others	Others	Others	Others	Others	Others	Others	Others	Others	NA	NA	NA	Others
FBgn0266148	lncRNA:CR44854	19836057	Promoter (<=1kb)	778	chr2L	14557745	14558074	330	147.734	2.48154	165	1	14557939	14558852	914	2	FBtr0343701	Others	Others	Others	Others	Others	Others	Others	Others	Others	Others	NA	NA	NA	Others
FBgn0261566	CG42680	10178899	Promoter (<=1kb)	-618	chr2L	14588852	14589181	330	260.969	4.10745	165	1	14587920	14588234	315	2	FBtr0302802	Others	Others	Others	Others	Others	Others	Others	Others	Others	Others	NA	NA	NA	Others
FBgn0028912	tRNA:Pro-AGG-1-2	3771762	Promoter (<=1kb)	-202	chr2L	14598328	14598657	330	217.646	4.10745	165	1	14598859	14598930	72	1	FBtr0080646	Others	Others	Others	Others	Others	Others	Others	Others	Others	Others	NA	NA	NA	Others
FBgn0000056	Adhr	3772432	Intron (FBtr0301496/FBgn0003016, intron 3 of 11)	4760	chr2L	14622271	14622491	221	568.459	4.10745	105	1	14617511	14618902	1392	1	FBtr0343699	Others	Others	Others	Others	Others	Others	Others	Others	Others	Others	NA	NA	NA	Others
FBgn0000056	Adhr	3772432	Intron (FBtr0301496/FBgn0003016, intron 3 of 11)	6430	chr2L	14623941	14624270	330	188.641	3.67495	165	1	14617511	14618902	1392	1	FBtr0343699	Others	Others	Others	Others	Others	Others	Others	Others	Others	Others	NA	NA	NA	Others
FBgn0000056	Adhr	3772432	Intron (FBtr0301496/FBgn0003016, intron 3 of 11)	13583	chr2L	14631094	14631292	199	445.167	4.10745	101	1	14617511	14618902	1392	1	FBtr0343699	Others	Others	Others	Others	Others	Others	Others	Others	Others	Others	NA	NA	NA	Others
FBgn0003016	osp	34850	Intron (FBtr0301496/FBgn0003016, intron 1 of 11)	3379	chr2L	14685695	14685961	267	764.666	4.10745	125	1	14599196	14689340	90145	2	FBtr0301496	Others	Others	Others	Others	Others	Others	Others	Others	Others	Others	NA	0.578504	2.55e-05	Others
FBgn0003016	osp	34850	Promoter (<=1kb)	-49	chr2L	14689389	14689689	301	1401.1	4.10745	139	1	14599776	14689340	89565	2	FBtr0301495	Others	Others	Others	Others	Others	Others	Others	Others	Others	Others	NA	0.578504	2.55e-05	Others
FBgn0028855	CG15282	34853	Distal Intergenic	-10673	chr2L	14701558	14701798	241	920.28	4.10745	113	1	14712471	14713118	648	1	FBtr0343706	Others	Others	Others	Others	Others	Others	Others	Others	Others	Others	NA	-0.820832	1.72e-49	Others
FBgn0028855	CG15282	34853	Distal Intergenic	-6046	chr2L	14706257	14706425	169	314.831	4.10745	140	1	14712471	14713118	648	1	FBtr0343706	Others	Others	Others	Others	Others	Others	Others	Others	Others	Others	NA	-0.820832	1.72e-49	Others
FBgn0086711	mol	34872	Promoter (1-2kb)	1345	chr2L	14995907	14996214	308	464.824	4.10745	116	1	14975747	14997559	21813	2	FBtr0080676	Others	Others	Others	Others	Others	Others	Others	Others	Others	Others	NA	0.488382	4.55e-05	Others
FBgn0040228	DCTN5-p25	34873	Promoter (<=1kb)	0	chr2L	15005496	15005825	330	344.392	4.10745	165	1	15005733	15006607	875	1	FBtr0080693	Others	Others	Others	Others	Others	Others	Others	Others	Others	Others	NA	-0.120579	0.643168	Others
FBgn0286027	Rnmt	34877	Promoter (<=1kb)	0	chr2L	15009750	15009966	217	491.769	4.10745	103	1	15009939	15011764	1826	1	FBtr0080696	Others	Others	Others	Others	Others	Others	Others	Others	Others	Others	NA	NA	NA	Others
FBgn0000317	ck	34882	Promoter (<=1kb)	0	chr2L	15057811	15058043	233	697.72	4.10745	134	1	15044963	15057862	12900	2	FBtr0080723	Others	Others	Others	Others	Others	Others	Others	Others	Others	Others	NA	-1.25787	5.9e-21	Others
FBgn0010422	TfIIS	34883	Promoter (<=1kb)	0	chr2L	15060671	15060951	281	845.197	4.10745	155	1	15058919	15060757	1839	2	FBtr0332475	Others	Others	Others	Others	Others	Others	Others	Others	Others	Others	NA	-0.573531	2.31e-08	Others
FBgn0283440	solo	26067079	Promoter (<=1kb)	0	chr2L	15061463	15061683	221	364.464	4.10745	133	1	15061656	15072133	10478	1	FBtr0445188	Others	Others	Others	Others	Others	Others	Others	Others	Others	Others	NA	NA	NA	Others
FBgn0024183	vig	34885	Promoter (<=1kb)	0	chr2L	15068007	15068263	257	1044.18	4.10745	107	1	15062931	15068078	5148	2	FBtr0080721	Others	Others	Others	Others	Others	Others	Others	Others	Others	Others	NA	-1.28553	8.46e-141	Others
FBgn0001978	stc	34888	Promoter (<=1kb)	0	chr2L	15113230	15113550	321	981.944	4.10745	165	1	15113480	15118069	4590	1	FBtr0080705	Others	Others	Others	Others	Others	Others	Others	Others	Others	Others	Others	0.250972	0.0313975	Others
FBgn0028862	dao	34891	Promoter (<=1kb)	0	chr2L	15248707	15248897	191	195.649	3.66367	133	1	15248879	15253228	4350	1	FBtr0336860	Others	Others	Others	Others	Others	Others	Others	Others	Others	Others	NA	1.64617	2.3e-06	Others
FBgn0028862	dao	34891	Promoter (<=1kb)	849	chr2L	15249728	15250057	330	229.547	4.10745	165	1	15248879	15254715	5837	1	FBtr0336859	Others	Others	Others	Others	Others	Others	Others	Others	Others	Others	NA	1.64617	2.3e-06	Others
FBgn0261268	Cul3	34896	Promoter (<=1kb)	0	chr2L	15271866	15272195	330	200.991	3.65414	165	1	15265245	15272024	6780	2	FBtr0302156	Others	Others	Others	Others	Others	Others	Others	Others	Others	Others	NA	-0.770812	1.64e-16	Others
FBgn0086691	UK114	34897	Promoter (1-2kb)	1320	chr2L	15273645	15273771	127	249.841	4.10745	53	1	15274181	15275091	911	2	FBtr0332376	Mitochondria	Others	Others	Others	Others	Others	Others	Others	Others	Others	NA	-1.39655	3.83e-41	MitoOthers
FBgn0041103	nht	34902	Distal Intergenic	-5363	chr2L	15324264	15324393	130	286.007	4.10745	47	1	15317954	15318901	948	2	FBtr0300021	Others	Others	Others	Others	Others	Others	Others	Others	Others	Others	NA	NA	NA	Others
FBgn0041103	nht	34902	Distal Intergenic	-6852	chr2L	15325753	15325834	82	168.997	3.34582	34	1	15317954	15318901	948	2	FBtr0300021	Others	Others	Others	Others	Others	Others	Others	Others	Others	Others	NA	NA	NA	Others
FBgn0001981	esg	34903	Distal Intergenic	3479	chr2L	15337345	15337532	188	394.857	4.10745	84	1	15333866	15336138	2273	1	FBtr0080734	Others	Others	Others	Others	Others	Others	Others	Others	Others	Others	NA	NA	NA	Others
FBgn0001981	esg	34903	Distal Intergenic	11569	chr2L	15345435	15345602	168	300.779	4.10745	83	1	15333866	15336138	2273	1	FBtr0080734	Others	Others	Others	Others	Others	Others	Others	Others	Others	Others	NA	NA	NA	Others
FBgn0266157	lncRNA:CR44863	19835925	Promoter (1-2kb)	1976	chr2L	15465230	15465429	200	418.755	4.10745	86	1	15463254	15463666	413	1	FBtr0343733	Others	Others	Others	Others	Others	Others	Others	Others	Others	Others	NA	NA	NA	Others
FBgn0266831	lncRNA:CR45293	19835054	Promoter (<=1kb)	-571	chr2L	15486522	15486851	330	155.277	2.82266	165	1	15485697	15485951	255	2	FBtr0345559	Others	Others	Others	Others	Others	Others	Others	Others	Others	Others	NA	NA	NA	Others
FBgn0002524	lace	34910	Promoter (<=1kb)	0	chr2L	15498838	15499191	354	1062.85	4.10745	182	1	15499127	15504591	5465	1	FBtr0343735	Others	Others	Others	Others	Others	Others	Others	Others	Others	Others	NA	-0.118025	0.105939	Others
FBgn0266309	lncRNA:CR44974	19835770	Promoter (2-3kb)	-2292	chr2L	15743636	15743965	330	196.301	3.66229	165	1	15746257	15747000	744	1	FBtr0344038	Others	Others	Others	Others	Others	Others	Others	Others	Others	Others	NA	NA	NA	Others
FBgn0010382	CycE	34924	Promoter (<=1kb)	-321	chr2L	15746931	15747095	165	152.268	2.6839	68	1	15727784	15746610	18827	2	FBtr0305561	Others	Others	Others	Others	Others	Others	Others	Others	Others	Others	NA	-1.87818	1.75e-16	Others
FBgn0010382	CycE	34924	Promoter (<=1kb)	0	chr2L	15748144	15748304	161	340.026	4.10745	86	1	15727581	15748150	20570	2	FBtr0080773	Others	Others	Others	Others	Others	Others	Others	Others	Others	Others	NA	-1.87818	1.75e-16	Others
FBgn0001989	ND-B17	34925	Promoter (<=1kb)	0	chr2L	15751033	15751249	217	502.228	4.10745	113	1	15749319	15751078	1760	2	FBtr0343722	Mitochondria	Others	Others	Others	Others	ETC	Others	Others	Others	Others	NA	-1.36739	1.12e-56	Mito_EBR
FBgn0028507	CG3793	34928	Promoter (<=1kb)	0	chr2L	15764041	15764370	330	189.459	3.6733	165	1	15764220	15766123	1904	1	FBtr0080761	Others	Others	Others	Others	Others	Others	Others	Others	Others	Others	NA	-0.0742318	0.49882	Others
FBgn0001990	wek	48785	Promoter (<=1kb)	0	chr2L	15768151	15768480	330	276.252	4.10745	165	1	15766133	15768349	2217	2	FBtr0331282	Others	Others	Others	Others	Others	Others	Others	Others	Others	Others	Others	0.0962786	0.583251	Others
FBgn0041627	Ku80	34930	Promoter (<=1kb)	0	chr2L	15771132	15771278	147	310.325	4.10745	70	1	15768630	15771159	2530	2	FBtr0080763	Others	Others	Others	Others	Others	Others	Others	Others	Others	Others	NA	1.17662	1.44e-16	Others
FBgn0266161	lncRNA:CR44867	19835974	Exon (FBtr0080808/FBgn0028645, exon 3 of 7)	-3184	chr2L	15908178	15908507	330	218.889	4.10745	165	1	15911691	15912062	372	1	FBtr0343723	Others	Others	Others	Others	Others	Others	Others	Others	Others	Others	NA	NA	NA	Others
FBgn0266161	lncRNA:CR44867	19835974	Promoter (1-2kb)	-1491	chr2L	15909871	15910200	330	148.298	2.48018	165	1	15911691	15912062	372	1	FBtr0343723	Others	Others	Others	Others	Others	Others	Others	Others	Others	Others	NA	NA	NA	Others
FBgn0266161	lncRNA:CR44867	19835974	Promoter (<=1kb)	-243	chr2L	15911122	15911448	327	1785.65	4.10745	157	1	15911691	15912062	372	1	FBtr0343723	Others	Others	Others	Others	Others	Others	Others	Others	Others	Others	NA	NA	NA	Others
FBgn0266162	lncRNA:CR44868	19835046	Promoter (<=1kb)	-297	chr2L	15912160	15912261	102	222.045	4.10745	53	1	15912558	15913109	552	1	FBtr0343724	Others	Others	Others	Others	Others	Others	Others	Others	Others	Others	NA	NA	NA	Others
FBgn0266162	lncRNA:CR44868	19835046	Promoter (<=1kb)	702	chr2L	15913260	15913589	330	233.168	4.10745	165	1	15912558	15913109	552	1	FBtr0343724	Others	Others	Others	Others	Others	Others	Others	Others	Others	Others	NA	NA	NA	Others
FBgn0264392	lncRNA:CR43840	14462785	Distal Intergenic	-7020	chr2L	16224064	16224295	232	296.059	4.10745	128	1	16216239	16217044	806	2	FBtr0332359	Others	Others	Others	Others	Others	Others	Others	Others	Others	Others	NA	NA	NA	Others
FBgn0024734	PRL-1	34952	Promoter (<=1kb)	0	chr2L	16257548	16257742	195	483.728	4.10745	82	1	16245835	16257606	11772	2	FBtr0080856	Others	Others	Others	Others	Others	Others	Others	Others	Others	Others	NA	0.122957	0.000111765	Others
FBgn0028897	CG4935	34955	Intron (FBtr0343814/FBgn0001994, intron 2 of 2)	7364	chr2L	16269505	16269649	145	293.111	4.10745	78	1	16262141	16263483	1343	1	FBtr0080825	Others	Others	Others	Others	Others	Others	Others	Others	Others	Others	NA	0.462838	0.0898443	Others
FBgn0028897	CG4935	34955	Intron (FBtr0343814/FBgn0001994, intron 2 of 2)	10722	chr2L	16272863	16272969	107	269.954	4.10745	38	1	16262141	16263483	1343	1	FBtr0080825	Others	Others	Others	Others	Others	Others	Others	Others	Others	Others	NA	0.462838	0.0898443	Others
FBgn0001994	crp	34956	Intron (FBtr0343814/FBgn0001994, intron 2 of 2)	11594	chr2L	16275807	16276136	330	182.845	3.68631	165	1	16263556	16287730	24175	2	FBtr0343814	Others	Others	Others	Others	Others	Others	Others	Others	Others	Others	Su	0.598561	2.96e-12	Others
FBgn0001994	crp	34956	Intron (FBtr0343814/FBgn0001994, intron 1 of 2)	7665	chr2L	16279733	16280065	333	827.834	4.10745	206	1	16263556	16287730	24175	2	FBtr0343814	Others	Others	Others	Others	Others	Others	Others	Others	Others	Others	Su	0.598561	2.96e-12	Others
FBgn0001994	crp	34956	Promoter (2-3kb)	2627	chr2L	16284774	16285103	330	217.589	4.10745	165	1	16263556	16287730	24175	2	FBtr0343814	Others	Others	Others	Others	Others	Others	Others	Others	Others	Others	Su	0.598561	2.96e-12	Others
FBgn0001994	crp	34956	Promoter (1-2kb)	1709	chr2L	16285760	16286021	262	1324.03	4.10745	137	1	16263556	16287730	24175	2	FBtr0343814	Others	Others	Others	Others	Others	Others	Others	Others	Others	Others	Su	0.598561	2.96e-12	Others
FBgn0001994	crp	34956	Promoter (1-2kb)	1078	chr2L	16286438	16286652	215	384.158	4.10745	145	1	16263556	16287730	24175	2	FBtr0343814	Others	Others	Others	Others	Others	Others	Others	Others	Others	Others	Su	0.598561	2.96e-12	Others
FBgn0001994	crp	34956	Promoter (<=1kb)	0	chr2L	16287678	16287992	315	909.886	4.10745	129	1	16263556	16287730	24175	2	FBtr0343814	Others	Others	Others	Others	Others	Others	Others	Others	Others	Others	Su	0.598561	2.96e-12	Others
FBgn0028895	CG17328	34962	Promoter (<=1kb)	0	chr2L	16300045	16300273	229	406.857	4.10745	31	1	16300214	16301765	1552	1	FBtr0080829	Others	Others	Others	Others	Others	Others	Others	Others	Others	Others	Others	0.313671	0.231693	Others
FBgn0000339	cni	34967	Promoter (<=1kb)	0	chr2L	16310703	16310949	247	583.144	4.10745	84	1	16309292	16310726	1435	2	FBtr0337082	Others	Others	Others	Others	Others	Others	Others	Others	Others	Others	NA	-0.186429	0.113145	Others
FBgn0000250	cact	34969	Promoter (<=1kb)	-59	chr2L	16325684	16325932	249	303.204	4.10745	139	1	16313685	16325625	11941	2	FBtr0080846	Others	Others	Others	Others	Others	Others	Others	Others	Others	Others	NA	-0.481118	3.16e-17	Others
FBgn0000250	cact	34969	Promoter (<=1kb)	0	chr2L	16325867	16326196	330	158.516	2.93426	165	1	16313097	16326101	13005	2	FBtr0080844	Others	Others	Others	Others	Others	Others	Others	Others	Others	Others	NA	-0.481118	3.16e-17	Others
FBgn0014092	CG4278	34970	Promoter (<=1kb)	0	chr2L	16326959	16327075	117	262.407	4.10745	108	1	16327069	16328131	1063	1	FBtr0080834	Mitochondria	Others	Others	Others	Others	Others	Others	Others	Others	Others	NA	-1.07146	2.76e-16	MitoOthers
FBgn0001995	mRpL4	49425	Promoter (<=1kb)	0	chr2L	16329071	16329338	268	578.156	4.10745	123	1	16328059	16329132	1074	2	FBtr0080843	Mitochondria	Others	Others	Others	Translation_mito	Others	Others	Others	Others	Others	NA	-1.0493	2.01e-27	Mito_EBR
FBgn0000307	chif	34974	Promoter (<=1kb)	0	chr2L	16350229	16350533	305	413.253	4.10745	87	1	16343600	16350283	6684	2	FBtr0321313	Others	Others	Others	Others	Others	Others	Others	Others	Others	Others	NA	0.25683	0.0764958	Others
FBgn0000307	chif	34974	Promoter (<=1kb)	-784	chr2L	16351067	16351412	346	3519.42	4.10745	187	1	16343600	16350283	6684	2	FBtr0321313	Others	Others	Others	Others	Others	Others	Others	Others	Others	Others	NA	0.25683	0.0764958	Others
FBgn0000307	chif	34974	Promoter (<=1kb)	0	chr2L	16352447	16352776	330	147.531	2.48179	165	1	16342430	16352628	10199	2	FBtr0080838	Others	Others	Others	Others	Others	Others	Others	Others	Others	Others	NA	0.25683	0.0764958	Others
FBgn0028523	CG5888	34980	Distal Intergenic	14748	chr2L	16390880	16391209	330	155.721	2.85773	165	1	16400175	16405957	5783	2	FBtr0340234	Others	Others	Others	Others	Others	Others	Others	Others	Others	Others	NA	-1.09789	4.41e-07	Others
FBgn0020414	Idgf3	34981	Promoter (<=1kb)	823	chr2L	16451883	16452212	330	181.081	3.68958	165	1	16451060	16455194	4135	1	FBtr0342945	Others	Others	Others	Others	Others	Others	Others	Others	Others	Others	NA	0.149114	0.0138488	Others
FBgn0005677	dac	34982	Intron (FBtr0080875/FBgn0005677, intron 2 of 10)	9048	chr2L	16476662	16476950	289	656.203	4.10745	147	1	16466512	16485998	19487	2	FBtr0080875	Others	Others	Others	Others	Others	Others	Others	Others	Others	Others	Others	1.45104	1.52e-05	Others
FBgn0005677	dac	34982	Promoter (<=1kb)	-500	chr2L	16486498	16486580	83	265.208	4.10745	33	1	16466512	16485998	19487	2	FBtr0100400	Others	Others	Others	Others	Others	Others	Others	Others	Others	Others	Others	1.45104	1.52e-05	Others
FBgn0032585	Nepl8	34983	Promoter (<=1kb)	-265	chr2L	16487641	16487883	243	891.8	4.10745	109	1	16488148	16490182	2035	1	FBtr0080865	Others	Others	Others	Others	Others	Others	Others	Others	Others	Others	NA	NA	NA	Others
FBgn0032586	Tpr2	34984	Promoter (<=1kb)	0	chr2L	16491165	16491575	411	845.806	4.10745	207	1	16491540	16507234	15695	1	FBtr0080866	Others	Others	Others	Others	Others	Others	Others	Others	Others	Others	NA	-0.306839	6.92e-08	Others
FBgn0032586	Tpr2	34984	Promoter (1-2kb)	1091	chr2L	16492631	16492884	254	810.633	4.10745	138	1	16491540	16507621	16082	1	FBtr0333487	Others	Others	Others	Others	Others	Others	Others	Others	Others	Others	NA	-0.306839	6.92e-08	Others
FBgn0032586	Tpr2	34984	Promoter (1-2kb)	-1254	chr2L	16495220	16495515	296	1674.99	4.10745	141	1	16496769	16507350	10582	1	FBtr0080867	Others	Others	Others	Others	Others	Others	Others	Others	Others	Others	NA	-0.306839	6.92e-08	Others
FBgn0032586	Tpr2	34984	Promoter (1-2kb)	-1153	chr2L	16500491	16500765	275	1517.11	4.10745	142	1	16501918	16507350	5433	1	FBtr0333486	Others	Others	Others	Others	Others	Others	Others	Others	Others	Others	NA	-0.306839	6.92e-08	Others
FBgn0032586	Tpr2	34984	Downstream (<=300bp)	5780	chr2L	16507698	16508027	330	171.959	3.33985	165	1	16501918	16507350	5433	1	FBtr0333486	Others	Others	Others	Others	Others	Others	Others	Others	Others	Others	NA	-0.306839	6.92e-08	Others
FBgn0032587	CG5953	34985	Promoter (1-2kb)	-1141	chr2L	16521318	16521751	434	1511.81	4.10745	224	1	16509120	16520177	11058	2	FBtr0301144	Others	Others	Others	Others	Others	Others	Others	Others	Others	Others	NA	1.61183	5.09e-47	Others
FBgn0263555	mir-4943	12798234	Promoter (2-3kb)	2021	chr2L	16526141	16526470	330	171.282	3.34098	165	1	16528375	16528491	117	2	FBtr0309684	Others	Others	Others	Others	Others	Others	Others	Others	Others	Others	NA	NA	NA	Others
FBgn0032587	CG5953	34985	Promoter (<=1kb)	-235	chr2L	16533112	16533429	318	1267.24	4.10745	167	1	16509120	16532877	23758	2	FBtr0080874	Others	Others	Others	Others	Others	Others	Others	Others	Others	Others	NA	1.61183	5.09e-47	Others
FBgn0266894	lncRNA:CR45354	19835421	Promoter (<=1kb)	0	chr2L	16534213	16534542	330	179.645	3.69199	165	1	16534057	16534488	432	2	FBtr0345762	Others	Others	Others	Others	Others	Others	Others	Others	Others	Others	NA	NA	NA	Others
FBgn0266895	lncRNA:CR45355	19835975	Promoter (<=1kb)	-19	chr2L	16535247	16535576	330	167.739	3.23913	165	1	16534962	16535228	267	2	FBtr0345761	Others	Others	Others	Others	Others	Others	Others	Others	Others	Others	NA	NA	NA	Others
FBgn0266895	lncRNA:CR45355	19835975	Promoter (<=1kb)	-590	chr2L	16535818	16536113	296	1256.29	4.10745	136	1	16534962	16535228	267	2	FBtr0345761	Others	Others	Others	Others	Others	Others	Others	Others	Others	Others	NA	NA	NA	Others
FBgn0051816	CG31816	318960	Promoter (1-2kb)	-1439	chr2L	16540778	16541107	330	142.52	2.39635	165	1	16542546	16543263	718	1	FBtr0080868	Others	Others	Others	Others	Others	Others	Others	Others	Others	Others	NA	-3.45824	0.316063	Others
FBgn0051816	CG31816	318960	Promoter (<=1kb)	723	chr2L	16543269	16543542	274	1019.44	4.10745	147	1	16542546	16543263	718	1	FBtr0080868	Others	Others	Others	Others	Others	Others	Others	Others	Others	Others	NA	-3.45824	0.316063	Others
FBgn0259735	mtgo	34987	Promoter (<=1kb)	923	chr2L	16545939	16546136	198	421.16	4.10745	77	1	16545016	16662012	116997	1	FBtr0300003	Others	Others	Others	Others	Others	Others	Others	Others	Others	Others	NA	0.0298712	0.831931	Others
FBgn0259735	mtgo	34987	Intron (FBtr0300003/FBgn0259735, intron 2 of 4)	-9503	chr2L	16591995	16592324	330	157.725	2.93617	165	1	16601827	16663218	61392	1	FBtr0335497	Others	Others	Others	Others	Others	Others	Others	Others	Others	Others	NA	0.0298712	0.831931	Others
FBgn0259735	mtgo	34987	Intron (FBtr0300003/FBgn0259735, intron 2 of 4)	-3795	chr2L	16597894	16598032	139	181.648	3.68851	86	1	16601827	16663218	61392	1	FBtr0335497	Others	Others	Others	Others	Others	Others	Others	Others	Others	Others	NA	0.0298712	0.831931	Others
FBgn0259735	mtgo	34987	Intron (FBtr0300003/FBgn0259735, intron 2 of 4)	-3227	chr2L	16598424	16598600	177	333.661	4.10745	78	1	16601827	16663218	61392	1	FBtr0335497	Others	Others	Others	Others	Others	Others	Others	Others	Others	Others	NA	0.0298712	0.831931	Others
FBgn0259735	mtgo	34987	Promoter (<=1kb)	0	chr2L	16601814	16602143	330	249.97	4.10745	165	1	16601827	16663218	61392	1	FBtr0335497	Others	Others	Others	Others	Others	Others	Others	Others	Others	Others	NA	0.0298712	0.831931	Others
FBgn0265000	lncRNA:CR44151	14462786	Intron (FBtr0300003/FBgn0259735, intron 2 of 4)	8546	chr2L	16620542	16620627	86	172.39	3.33911	57	1	16628752	16629173	422	2	FBtr0335498	Others	Others	Others	Others	Others	Others	Others	Others	Others	Others	NA	NA	NA	Others
FBgn0259735	mtgo	34987	Intron (FBtr0300003/FBgn0259735, intron 2 of 4)	-12852	chr2L	16644041	16644245	205	344.582	4.10745	87	1	16657097	16661995	4899	1	FBtr0300005	Others	Others	Others	Others	Others	Others	Others	Others	Others	Others	NA	0.0298712	0.831931	Others
FBgn0259735	mtgo	34987	Intron (FBtr0300003/FBgn0259735, intron 2 of 4)	-9086	chr2L	16647873	16648011	139	189.919	3.6717	46	1	16657097	16661995	4899	1	FBtr0300005	Others	Others	Others	Others	Others	Others	Others	Others	Others	Others	NA	0.0298712	0.831931	Others
FBgn0259735	mtgo	34987	Promoter (<=1kb)	-271	chr2L	16656738	16656826	89	197.99	3.65938	79	1	16657097	16661995	4899	1	FBtr0300005	Others	Others	Others	Others	Others	Others	Others	Others	Others	Others	NA	0.0298712	0.831931	Others
FBgn0001185	her	34992	Promoter (<=1kb)	0	chr2L	16677048	16677268	221	604.907	4.10745	131	1	16677185	16679383	2199	1	FBtr0080883	Others	Others	Others	Others	Others	Others	Others	Others	Others	Others	Others	0.215178	0.209136	Others
FBgn0261278	grp	34993	Promoter (<=1kb)	0	chr2L	16679893	16680074	182	420.547	4.10745	105	1	16680054	16699926	19873	1	FBtr0080884	Others	Others	Others	Others	Others	Others	Others	Others	Others	Others	NA	-0.874583	4.17e-18	Others
FBgn0267347	squ	2768920	Promoter (<=1kb)	0	chr2L	16680363	16680692	330	225.481	4.10745	165	1	16680570	16681653	1084	1	FBtr0305565	Others	Others	Others	Others	Others	Others	Others	Others	Others	Others	NA	-1.09552	0.0316154	Others
FBgn0051807	CG31807	318953	Promoter (<=1kb)	-293	chr2L	16684301	16684535	235	276.333	4.10745	115	1	16681819	16684008	2190	2	FBtr0344410	Others	Others	Others	Others	Others	Others	Others	Others	Others	Others	NA	-1.22855	0.389481	Others
FBgn0263745	NA	NA	Promoter (<=1kb)	-25	chr2L	16703222	16703305	84	295.68	4.10745	41	1	16700940	16703197	2258	2	FBtr0310392	Others	Others	Others	Others	Others	Others	Others	Others	Others	Others	NA	NA	NA	Others
FBgn0263745	NA	NA	Promoter (<=1kb)	-703	chr2L	16703900	16704053	154	219.942	4.10745	81	1	16700940	16703197	2258	2	FBtr0310392	Others	Others	Others	Others	Others	Others	Others	Others	Others	Others	NA	NA	NA	Others
FBgn0086907	Cyt-c-d	34995	Intron (FBtr0303445/FBgn0062978, intron 1 of 1)	-5973	chr2L	16709687	16709918	232	480.725	4.10745	119	1	16715891	16719635	3745	1	FBtr0080888	Mitochondria	Others	Others	Others	Others	ETC	tsETC	Others	Others	Others	NA	-3.3661	0.268385	MitoOthers
FBgn0086907	Cyt-c-d	34995	Intron (FBtr0303445/FBgn0062978, intron 1 of 1)	-4777	chr2L	16710785	16711114	330	153.03	2.73495	165	1	16715891	16719635	3745	1	FBtr0080888	Mitochondria	Others	Others	Others	Others	ETC	tsETC	Others	Others	Others	NA	-3.3661	0.268385	MitoOthers
FBgn0062978	CG31808	10178782	Promoter (<=1kb)	0	chr2L	16716177	16716499	323	1954.25	4.10745	149	1	16704286	16716195	11910	2	FBtr0303445	Others	Others	Others	Others	Others	Others	Others	Others	Others	Others	NA	1.45547	7.77e-46	Others
FBgn0284248	Cyt-c-p	34996	Promoter (<=1kb)	-41	chr2L	16719665	16719891	227	341.441	4.10745	140	1	16719932	16722644	2713	1	FBtr0080889	Mitochondria	Others	Others	Others	Others	ETC	Others	Others	Others	Others	NA	-1.46248	3.27e-247	Mito_EBR
FBgn0284248	Cyt-c-p	34996	Promoter (<=1kb)	817	chr2L	16720749	16720978	230	469.984	4.10745	109	1	16719932	16722644	2713	1	FBtr0080889	Mitochondria	Others	Others	Others	Others	ETC	Others	Others	Others	Others	NA	-1.46248	3.27e-247	Mito_EBR
FBgn0284248	Cyt-c-p	34996	Promoter (<=1kb)	-469	chr2L	16721213	16721542	330	146.424	2.46902	165	1	16722011	16722644	634	1	FBtr0344849	Mitochondria	Others	Others	Others	Others	ETC	Others	Others	Others	Others	NA	-1.46248	3.27e-247	Mito_EBR
FBgn0027779	VhaSFD	34997	Promoter (<=1kb)	0	chr2L	16727667	16727996	330	295.36	4.10745	165	1	16722883	16727826	4944	2	FBtr0335143	Others	Others	Others	Others	Others	Others	Others	Others	Others	Others	NA	-0.44959	2.45e-31	Others
FBgn0263746	NA	NA	Promoter (<=1kb)	0	chr2L	16729672	16729762	91	295.545	4.10745	11	1	16728035	16729681	1647	2	FBtr0310391	Others	Others	Others	Others	Others	Others	Others	Others	Others	Others	NA	NA	NA	Others
FBgn0004797	mdy	44887	Promoter (<=1kb)	-23	chr2L	16816371	16816637	267	503.014	4.10745	135	1	16816660	16826964	10305	1	FBtr0080915	Others	Others	Others	Others	Others	Others	Others	Others	Others	Others	NA	-0.312014	3.74e-06	Others
FBgn0004797	mdy	44887	Promoter (<=1kb)	634	chr2L	16817742	16817882	141	254.65	4.10745	38	1	16817108	16826964	9857	1	FBtr0347182	Others	Others	Others	Others	Others	Others	Others	Others	Others	Others	NA	-0.312014	3.74e-06	Others
FBgn0004797	mdy	44887	Promoter (1-2kb)	1332	chr2L	16818440	16818604	165	161.741	3.02914	93	1	16817108	16826964	9857	1	FBtr0347182	Others	Others	Others	Others	Others	Others	Others	Others	Others	Others	NA	-0.312014	3.74e-06	Others
FBgn0032618	CG31743	326156	Promoter (<=1kb)	-4	chr2L	16879404	16879513	110	341.571	4.10745	39	1	16879517	16886319	6803	1	FBtr0080947	Others	Others	Others	Others	Others	Others	Others	Others	Others	Others	NA	NA	NA	Others
FBgn0040985	CG6115	50459	Promoter (<=1kb)	-56	chr2L	16888022	16888180	159	282.301	4.10745	63	1	16887125	16887966	842	2	FBtr0080959	Mitochondria	Others	Others	Others	Others	Others	Others	Others	Others	Others	NA	1.72788	2e-87	MitoOthers
FBgn0267018	lncRNA:CR45462	19834847	Distal Intergenic	-9599	chr2L	17027648	17027749	102	222.284	4.10745	59	1	17017747	17018049	303	2	FBtr0345974	Others	Others	Others	Others	Others	Others	Others	Others	Others	Others	NA	NA	NA	Others
FBgn0265546	lncRNA:CR44396	19835555	Promoter (2-3kb)	2792	chr2L	17243496	17243825	330	349.391	4.10745	165	1	17245856	17246617	762	2	FBtr0340181	Others	Others	Others	Others	Others	Others	Others	Others	Others	Others	NA	NA	NA	Others
FBgn0032629	beat-IIIc	35037	Promoter (<=1kb)	0	chr2L	17260596	17260925	330	337.87	4.10745	165	1	17187637	17260734	73098	2	FBtr0080972	Others	Others	Others	Others	Others	Others	Others	Others	Others	Others	NA	1.60321	6.59e-16	Others
FBgn0032633	Lrch	35041	Intron (FBtr0080968/FBgn0032633, intron 1 of 6)	4886	chr2L	17378847	17379229	383	1406.54	4.10745	245	1	17367511	17384115	16605	2	FBtr0080968	Others	Others	Others	Others	Others	Others	Others	Others	Others	Others	NA	0.540217	0.00296356	Others
FBgn0032633	Lrch	35041	Intron (FBtr0080968/FBgn0032633, intron 1 of 6)	3906	chr2L	17379938	17380209	272	932.715	4.10745	150	1	17367511	17384115	16605	2	FBtr0080968	Others	Others	Others	Others	Others	Others	Others	Others	Others	Others	NA	0.540217	0.00296356	Others
FBgn0032633	Lrch	35041	Promoter (1-2kb)	1545	chr2L	17382320	17382570	251	352.045	4.10745	158	1	17367511	17384115	16605	2	FBtr0080968	Others	Others	Others	Others	Others	Others	Others	Others	Others	Others	NA	0.540217	0.00296356	Others
FBgn0032633	Lrch	35041	Promoter (<=1kb)	0	chr2L	17384095	17384293	199	402.168	4.10745	33	1	17367511	17384115	16605	2	FBtr0080968	Others	Others	Others	Others	Others	Others	Others	Others	Others	Others	NA	0.540217	0.00296356	Others
FBgn0020503	CLIP-190	35042	Promoter (<=1kb)	0	chr2L	17384595	17384726	132	328.204	4.10745	89	1	17384700	17404640	19941	1	FBtr0301442	Others	Others	Others	Others	Others	Others	Others	Others	Others	Others	NA	0.708097	1.72e-40	Others
FBgn0032635	CG15141	35044	Promoter (<=1kb)	0	chr2L	17410483	17410646	164	366.146	4.10745	81	1	17410641	17413499	2859	1	FBtr0080979	Others	Others	Others	Others	Others	Others	Others	Others	Others	Others	NA	0.30728	0.0999377	Others
FBgn0265582	lncRNA:CR44409	19836067	Promoter (<=1kb)	338	chr2L	17430044	17430218	175	185.792	3.67988	78	1	17429706	17430157	452	1	FBtr0340249	Others	Others	Others	Others	Others	Others	Others	Others	Others	Others	NA	NA	NA	Others
FBgn0267923	lncRNA:CR46204	26067515	Promoter (<=1kb)	422	chr2L	17450916	17451044	129	225.849	4.10745	58	1	17450494	17452384	1891	1	FBtr0347483	Others	Others	Others	Others	Others	Others	Others	Others	Others	Others	NA	NA	NA	Others
FBgn0032640	Sgt	35052	Intron (FBtr0330225/FBgn0000183, intron 1 of 7)	-4992	chr2L	17466364	17466611	248	964.911	4.10745	123	1	17471603	17474773	3171	1	FBtr0305683	Others	Others	Others	Others	Others	Others	Others	Others	Others	Others	NA	-0.905029	2.27e-45	Others
FBgn0000183	BicD	35051	Promoter (<=1kb)	0	chr2L	17472994	17473323	330	233.123	4.10745	165	1	17459605	17473215	13611	2	FBtr0330225	Others	Others	Others	Others	Others	Others	Others	Others	Others	Others	NA	-0.53701	1.46e-06	Others
FBgn0286781	cass	35053	Promoter (<=1kb)	0	chr2L	17477830	17478064	235	547.051	4.10745	109	1	17474912	17477888	2977	2	FBtr0081001	Others	Others	Others	Others	Others	Others	Others	Others	Others	Others	NA	NA	NA	Others
FBgn0024689	fws	35054	Promoter (<=1kb)	0	chr2L	17481019	17481254	236	686.346	4.10745	138	1	17478442	17481029	2588	2	FBtr0080999	Others	Others	Others	Others	Others	Others	Others	Others	Others	Others	NA	-0.286383	0.00230045	Others
FBgn0032643	GCS2beta	35056	Promoter (<=1kb)	0	chr2L	17484237	17484573	337	1864.6	4.10745	157	1	17481988	17484307	2320	2	FBtr0080998	Others	Others	Others	Others	Others	Others	Others	Others	Others	Others	NA	-1.40243	4.31e-117	Others
FBgn0003187	qua	35058	Promoter (<=1kb)	-102	chr2L	17497310	17497639	330	150.721	2.59716	165	1	17486806	17497208	10403	2	FBtr0080996	Others	Others	Others	Others	Others	Others	Others	Others	Others	Others	NA	-1.03441	5.49e-18	Others
FBgn0032646	mEFTs	35060	Promoter (<=1kb)	0	chr2L	17501085	17501220	136	373.764	4.10745	51	1	17499268	17501106	1839	2	FBtr0080994	Mitochondria	Others	Others	Others	Translation_mito	Others	Others	Others	Others	Others	NA	-1.48868	6.46e-62	Mito_EBR
FBgn0032647	CG15143	35062	Intron (FBtr0304742/FBgn0013810, intron 16 of 22)	10163	chr2L	17514173	17514386	214	296.207	4.10745	117	1	17520892	17524549	3658	2	FBtr0080993	Others	Others	Others	Others	Others	Others	Others	Others	Others	Others	NA	0.940266	0.423581	Others
FBgn0262996	lncRNA:CR43304	12797994	Promoter (<=1kb)	-25	chr2L	17541500	17541829	330	208.965	3.63879	165	1	17541854	17542383	530	1	FBtr0306838	Others	Others	Others	Others	Others	Others	Others	Others	Others	Others	NA	NA	NA	Others
FBgn0262996	lncRNA:CR43304	12797994	Promoter (1-2kb)	1568	chr2L	17543422	17543751	330	147.029	2.46772	165	1	17541854	17542383	530	1	FBtr0306838	Others	Others	Others	Others	Others	Others	Others	Others	Others	Others	NA	NA	NA	Others
FBgn0266586	lncRNA:CR45111	19834758	Promoter (<=1kb)	-602	chr2L	17583079	17583307	229	617.006	4.10745	121	1	17583909	17584468	560	1	FBtr0344798	Others	Others	Others	Others	Others	Others	Others	Others	Others	Others	NA	NA	NA	Others
FBgn0032651	Oli	35066	Promoter (<=1kb)	0	chr2L	17589834	17590163	330	196.346	3.66222	165	1	17590140	17591267	1128	1	FBtr0303253	Others	Others	Others	Others	Others	Others	Others	Others	Others	Others	Others	0.347395	0.373054	Others
FBgn0265585	lncRNA:CR44412	19835511	3' UTR	3724	chr2L	17603207	17603536	330	214.257	4.10745	165	1	17606465	17607260	796	2	FBtr0340253	Others	Others	Others	Others	Others	Others	Others	Others	Others	Others	NA	NA	NA	Others
FBgn0015609	CadN	35070	Distal Intergenic	-3691	chr2L	17782031	17782173	143	227.402	4.10745	92	1	17647053	17778340	131288	2	FBtr0081015	Others	Others	Others	Others	Others	Others	Others	Others	Others	Others	NA	1.83412	1.12e-53	Others
FBgn0015609	CadN	35070	Distal Intergenic	-6451	chr2L	17784791	17784922	132	299.23	4.10745	48	1	17647053	17778340	131288	2	FBtr0081015	Others	Others	Others	Others	Others	Others	Others	Others	Others	Others	NA	1.83412	1.12e-53	Others
FBgn0262963	lncRNA:CR43274	12798002	Promoter (2-3kb)	-2521	chr2L	17921652	17921813	162	256.4	4.10745	79	1	17918552	17919131	580	2	FBtr0306710	Others	Others	Others	Others	Others	Others	Others	Others	Others	Others	NA	NA	NA	Others
FBgn0032666	CG5758	35083	Promoter (<=1kb)	-656	chr2L	18121675	18121872	198	348.692	4.10745	121	1	18122528	18129862	7335	1	FBtr0081036	Others	Others	Others	Others	Others	Others	Others	Others	Others	Others	NA	0.187108	0.110332	Others
FBgn0001301	kel	35084	Promoter (<=1kb)	0	chr2L	18137992	18138226	235	563.686	4.10745	67	1	18129884	18138083	8200	2	FBtr0081042	Others	Others	Others	Others	Others	Others	Others	Others	Others	Others	NA	1.81863	1.35e-57	Others
FBgn0265671	lncRNA:CR44478	19835651	Intron (FBtr0081040/FBgn0041184, intron 2 of 3)	-3410	chr2L	18141518	18141688	171	344.795	4.10745	68	1	18145098	18145499	402	1	FBtr0340578	Others	Others	Others	Others	Others	Others	Others	Others	Others	Others	NA	NA	NA	Others
FBgn0265671	lncRNA:CR44478	19835651	Promoter (<=1kb)	264	chr2L	18145362	18145599	238	923.597	4.10745	119	1	18145098	18145499	402	1	FBtr0340578	Others	Others	Others	Others	Others	Others	Others	Others	Others	Others	NA	NA	NA	Others
FBgn0041184	Socs36E	35085	Intron (FBtr0081040/FBgn0041184, intron 1 of 3)	3308	chr2L	18148920	18149109	190	457.491	4.10745	127	1	18138675	18152417	13743	2	FBtr0081040	Others	Others	Others	Others	Others	Others	Others	Others	Others	Others	NA	2.19974	2.89e-99	Others
FBgn0041184	Socs36E	35085	Promoter (1-2kb)	1595	chr2L	18150493	18150822	330	183.506	3.68476	165	1	18138675	18152417	13743	2	FBtr0081040	Others	Others	Others	Others	Others	Others	Others	Others	Others	Others	NA	2.19974	2.89e-99	Others
FBgn0041184	Socs36E	35085	Promoter (<=1kb)	947	chr2L	18151141	18151470	330	369.456	4.10745	165	1	18138675	18152417	13743	2	FBtr0081040	Others	Others	Others	Others	Others	Others	Others	Others	Others	Others	NA	2.19974	2.89e-99	Others
FBgn0041184	Socs36E	35085	Promoter (<=1kb)	0	chr2L	18152365	18152643	279	1330.7	4.10745	133	1	18138675	18152417	13743	2	FBtr0081040	Others	Others	Others	Others	Others	Others	Others	Others	Others	Others	NA	2.19974	2.89e-99	Others
FBgn0032671	JMJD4	35089	Promoter (<=1kb)	-2	chr2L	18158682	18158763	82	180.921	3.68999	54	1	18157110	18158680	1571	2	FBtr0081062	Others	Others	Others	Others	Others	Others	Others	Others	Others	Others	NA	-0.571743	5.02e-06	Others
FBgn0266205	lncRNA:CR44900	19836241	Promoter (<=1kb)	-940	chr2L	18186797	18186985	189	353.311	4.10745	97	1	18185160	18185857	698	2	FBtr0343820	Others	Others	Others	Others	Others	Others	Others	Others	Others	Others	NA	NA	NA	Others
FBgn0265682	lncRNA:CR44489	19836111	Promoter (1-2kb)	1495	chr2L	18312382	18312556	175	273.487	4.10745	110	1	18313521	18314051	531	2	FBtr0340582	Others	Others	Others	Others	Others	Others	Others	Others	Others	Others	NA	NA	NA	Others
FBgn0000636	Fas3	35097	Promoter (1-2kb)	-1067	chr2L	18318706	18319035	330	141.194	2.35296	165	1	18320102	18387103	67002	1	FBtr0112804	Others	Others	Others	Others	Others	Others	Others	Others	Others	Others	NA	-0.682066	5.37e-29	Others
FBgn0000636	Fas3	35097	Promoter (<=1kb)	0	chr2L	18319995	18320324	330	230.693	4.10745	165	1	18320102	18387103	67002	1	FBtr0112804	Others	Others	Others	Others	Others	Others	Others	Others	Others	Others	NA	-0.682066	5.37e-29	Others
FBgn0000636	Fas3	35097	Intron (FBtr0112804/FBgn0000636, intron 1 of 4)	5056	chr2L	18325158	18325451	294	1519.25	4.10745	127	1	18320102	18393441	73340	1	FBtr0344782	Others	Others	Others	Others	Others	Others	Others	Others	Others	Others	NA	-0.682066	5.37e-29	Others
FBgn0000636	Fas3	35097	Intron (FBtr0112804/FBgn0000636, intron 1 of 4)	8732	chr2L	18328834	18329037	204	634.039	4.10745	111	1	18320102	18393441	73340	1	FBtr0344782	Others	Others	Others	Others	Others	Others	Others	Others	Others	Others	NA	-0.682066	5.37e-29	Others
FBgn0000636	Fas3	35097	Intron (FBtr0112804/FBgn0000636, intron 1 of 4)	15707	chr2L	18335809	18335913	105	216.141	4.10745	25	1	18320102	18393441	73340	1	FBtr0344782	Others	Others	Others	Others	Others	Others	Others	Others	Others	Others	NA	-0.682066	5.37e-29	Others
FBgn0011559	Acp36DE	35096	Intron (FBtr0112804/FBgn0000636, intron 1 of 4)	17838	chr2L	18341088	18341188	101	184.841	3.68193	62	1	18356047	18359026	2980	2	FBtr0340581	Others	Others	Others	Others	Others	Others	Others	Others	Others	Others	NA	0.458555	0.345607	Others
FBgn0085200	CG34171	5740474	Promoter (1-2kb)	-1157	chr2L	18377226	18377434	209	487.388	4.10745	109	1	18378591	18379909	1319	1	FBtr0305066	Others	Others	Others	Others	Others	Others	Others	Others	Others	Others	NA	-0.46885	0.590282	Others
FBgn0261597	RpS26	35098	Promoter (1-2kb)	1627	chr2L	18441272	18441601	330	148.877	2.49408	165	1	18441335	18443228	1894	2	FBtr0346591	Others	Others	Others	Others	Others	Others	Others	Others	Others	Others	NA	-0.517249	9.93e-27	Others
FBgn0261597	RpS26	35098	Promoter (<=1kb)	0	chr2L	18443108	18443437	330	274.314	4.10745	165	1	18441335	18443228	1894	2	FBtr0346591	Others	Others	Others	Others	Others	Others	Others	Others	Others	Others	NA	-0.517249	9.93e-27	Others
FBgn0086707	ncm	35099	Promoter (<=1kb)	0	chr2L	18448770	18449482	713	1144.76	4.10745	484	1	18444507	18448957	4451	2	FBtr0081088	Others	Others	Others	Others	Others	Others	Others	Others	Others	Others	NA	-0.476252	0.000220106	Others
FBgn0032680	Ntf-2r	35101	Promoter (<=1kb)	0	chr2L	18454535	18454709	175	566.476	4.10745	83	1	18454649	18455419	771	1	FBtr0081063	Others	Others	Others	Others	Others	Others	Others	Others	Others	Others	NA	NA	NA	Others
FBgn0262456	mir-125	12798013	Intron (FBtr0081085/FBgn0032681, intron 1 of 8)	5165	chr2L	18477480	18477705	226	425.098	4.10745	189	1	18472315	18472424	110	1	FBtr0304491	Others	Others	Others	Others	Others	Others	Others	Others	Others	Others	NA	NA	NA	Others
FBgn0032681	CG10283	35102	Promoter (<=1kb)	0	chr2L	18484261	18484590	330	214.076	4.10745	165	1	18472964	18484438	11475	2	FBtr0081085	Others	Others	Others	Others	Others	Others	Others	Others	Others	Others	NA	-0.214718	0.259919	Others
FBgn0032683	kon	35104	Promoter (<=1kb)	-962	chr2L	18504940	18505202	263	531.614	4.10745	101	1	18487747	18503978	16232	2	FBtr0332322	Others	Others	Others	Others	Others	Others	Others	Others	Others	Others	NA	0.119776	0.638299	Others
FBgn0032683	kon	35104	Promoter (1-2kb)	-1624	chr2L	18505602	18505790	189	300.465	4.10745	101	1	18487747	18503978	16232	2	FBtr0332322	Others	Others	Others	Others	Others	Others	Others	Others	Others	Others	NA	0.119776	0.638299	Others
FBgn0032683	kon	35104	Promoter (2-3kb)	-2131	chr2L	18506109	18506438	330	208.544	3.63965	165	1	18487747	18503978	16232	2	FBtr0332322	Others	Others	Others	Others	Others	Others	Others	Others	Others	Others	NA	0.119776	0.638299	Others
FBgn0085370	Pde11	35107	Intron (FBtr0343830/FBgn0085370, intron 1 of 16)	6265	chr2L	18556578	18556907	330	141.51	2.36342	165	1	18532025	18563172	31148	2	FBtr0343830	Others	Others	Others	Others	Others	Others	Others	Others	Others	Others	NA	1.16145	1.62e-34	Others
FBgn0085370	Pde11	35107	Intron (FBtr0343830/FBgn0085370, intron 1 of 16)	4799	chr2L	18558044	18558373	330	169.426	3.34498	165	1	18532025	18563172	31148	2	FBtr0343830	Others	Others	Others	Others	Others	Others	Others	Others	Others	Others	NA	1.16145	1.62e-34	Others
FBgn0085370	Pde11	35107	Promoter (1-2kb)	-1349	chr2L	18564521	18564850	330	152.55	2.68354	165	1	18532728	18563172	30445	2	FBtr0303162	Others	Others	Others	Others	Others	Others	Others	Others	Others	Others	NA	1.16145	1.62e-34	Others
FBgn0085370	Pde11	35107	Intron (FBtr0303163/FBgn0085370, intron 1 of 17)	4344	chr2L	18567613	18567942	330	151.133	2.61682	165	1	18532025	18572286	40262	2	FBtr0303163	Others	Others	Others	Others	Others	Others	Others	Others	Others	Others	NA	1.16145	1.62e-34	Others
FBgn0085370	Pde11	35107	Intron (FBtr0343831/FBgn0085370, intron 2 of 17)	5455	chr2L	18584784	18584887	104	170.796	3.34183	16	1	18532728	18590342	57615	2	FBtr0343831	Others	Others	Others	Others	Others	Others	Others	Others	Others	Others	NA	1.16145	1.62e-34	Others
FBgn0032688	CG15160	35109	Promoter (<=1kb)	0	chr2L	18590719	18590958	240	529.589	4.10745	134	1	18590891	18595429	4539	1	FBtr0081070	Others	Others	Others	Others	Others	Others	Others	Others	Others	Others	NA	0.0153321	0.962017	Others
FBgn0032689	CG10413	35111	Promoter (<=1kb)	0	chr2L	18604985	18605295	311	1711.91	4.10745	149	1	18599755	18605022	5268	2	FBtr0081080	Others	Others	Others	Others	Others	Others	Others	Others	Others	Others	NA	0.259864	0.00836519	Others
FBgn0032690	CG10333	35112	Promoter (<=1kb)	0	chr2L	18606762	18606874	113	227.207	4.10745	65	1	18606832	18609550	2719	1	FBtr0081072	Others	Others	Others	Others	Others	Others	Others	Others	Others	Others	NA	-0.227065	0.133842	Others
FBgn0032691	Atac2	35113	Promoter (<=1kb)	0	chr2L	18612221	18612406	186	309.126	4.10745	63	1	18609576	18612249	2674	2	FBtr0081079	Others	Others	Others	Others	Others	Others	Others	Others	Others	Others	NA	-0.806494	2.29e-07	Others
FBgn0032692	IFT46	35114	Promoter (<=1kb)	-13	chr2L	18616119	18616448	330	168.59	3.34672	165	1	18614339	18616106	1768	2	FBtr0081078	Others	Others	Others	Others	Others	Others	Others	Others	Others	Others	NA	0.777316	0.324914	Others
FBgn0032694	MESR3	35116	Intron (FBtr0081073/FBgn0032694, intron 1 of 3)	4577	chr2L	18621833	18621999	167	160.06	2.97909	61	1	18617256	18661776	44521	1	FBtr0343808	Others	Others	Others	Others	Others	Others	Others	Others	Others	Others	NA	0.955764	5.65e-20	Others
FBgn0032694	MESR3	35116	Intron (FBtr0081073/FBgn0032694, intron 1 of 3)	8234	chr2L	18625490	18625819	330	252.91	4.10745	165	1	18617256	18661776	44521	1	FBtr0343808	Others	Others	Others	Others	Others	Others	Others	Others	Others	Others	NA	0.955764	5.65e-20	Others
FBgn0032694	MESR3	35116	Intron (FBtr0081073/FBgn0032694, intron 1 of 3)	9742	chr2L	18626998	18627215	218	455.691	4.10745	106	1	18617256	18661776	44521	1	FBtr0343808	Others	Others	Others	Others	Others	Others	Others	Others	Others	Others	NA	0.955764	5.65e-20	Others
FBgn0032693	Cyp310a1	35115	Intron (FBtr0081073/FBgn0032694, intron 2 of 3)	4491	chr2L	18648354	18648519	166	273.726	4.10745	103	1	18651058	18653010	1953	2	FBtr0081077	Others	Others	Others	Others	Others	Others	Others	Others	Others	Others	NA	-2.45068	1.02e-40	Others
FBgn0032693	Cyp310a1	35115	Promoter (<=1kb)	-396	chr2L	18653406	18653612	207	580.327	4.10745	104	1	18651058	18653010	1953	2	FBtr0081077	Others	Others	Others	Others	Others	Others	Others	Others	Others	Others	NA	-2.45068	1.02e-40	Others
FBgn0086909	CG31751	35118	Promoter (<=1kb)	86	chr2L	18677444	18677645	202	326.667	4.10745	128	1	18677358	18683715	6358	1	FBtr0445413	Others	Others	Others	Others	Others	Others	Others	Others	Others	Others	NA	0.183606	0.0734344	Others
FBgn0015553	tos	35119	Promoter (<=1kb)	0	chr2L	18682005	18682183	179	326	4.10745	60	1	18679631	18682075	2445	2	FBtr0081131	Others	Others	Others	Others	Others	Others	Others	Others	Others	Others	NA	-1.49472	4.7e-06	Others
FBgn0005617	msl-1	35121	Promoter (<=1kb)	0	chr2L	18688763	18688954	192	546.372	4.10745	118	1	18683720	18688800	5081	2	FBtr0081130	Others	Others	Others	Others	Others	Others	Others	Others	Others	Others	NA	-0.372302	0.034092	Others
FBgn0032698	CG10336	35122	Promoter (<=1kb)	0	chr2L	18689478	18689807	330	177.356	3.6972	165	1	18689528	18690906	1379	1	FBtr0273194	Others	Others	Others	Others	Others	Others	Others	Others	Others	Others	NA	-2.46443	6.28e-14	Others
FBgn0032699	CG10383	35123	Promoter (1-2kb)	1322	chr2L	18693907	18694104	198	371.005	4.10745	126	1	18690904	18695426	4523	2	FBtr0089628	Others	Others	Others	Others	Others	Others	Others	Others	Others	Others	NA	1.76984	1.37e-134	Others
FBgn0032699	CG10383	35123	Promoter (<=1kb)	0	chr2L	18695443	18695751	309	1145.71	4.10745	155	1	18690904	18695602	4699	2	FBtr0343117	Others	Others	Others	Others	Others	Others	Others	Others	Others	Others	NA	1.76984	1.37e-134	Others
FBgn0032701	CG10341	35125	Promoter (<=1kb)	0	chr2L	18698561	18698890	330	155.414	2.8223	165	1	18698714	18700645	1932	1	FBtr0081097	Others	Others	Others	Others	Others	Others	Others	Others	Others	Others	NA	-0.705455	5.38e-08	Others
FBgn0032703	CG10343	35127	Promoter (<=1kb)	0	chr2L	18703340	18703490	151	220.351	4.10745	112	1	18703473	18704454	982	1	FBtr0081098	Others	Others	Others	Others	Others	Others	Others	Others	Others	Others	NA	-1.07148	8e-14	Others
FBgn0032704	Jwa	35128	Promoter (<=1kb)	0	chr2L	18705673	18705983	311	1407.06	4.10745	126	1	18704570	18705703	1134	2	FBtr0343116	Others	Others	Others	Others	Others	Others	Others	Others	Others	Others	NA	-0.48717	1.81e-16	Others
FBgn0025608	Faf2	35129	Promoter (<=1kb)	423	chr2L	18707847	18708176	330	159.962	2.97925	165	1	18706010	18708599	2590	2	FBtr0343115	Others	Others	Others	Others	Others	Others	Others	Others	Others	Others	NA	0.349495	7.91e-08	Others
FBgn0025608	Faf2	35129	Promoter (<=1kb)	0	chr2L	18708578	18708843	266	854.961	4.10745	115	1	18706010	18708599	2590	2	FBtr0343115	Others	Others	Others	Others	Others	Others	Others	Others	Others	Others	NA	0.349495	7.91e-08	Others
FBgn0032706	Irk3	35131	Intron (FBtr0343112/FBgn0032707, intron 1 of 1)	-3978	chr2L	18717726	18717883	158	178.696	3.69405	75	1	18712676	18713748	1073	2	FBtr0343113	Others	Others	Others	Others	Others	Others	Others	Others	Others	Others	NA	-0.0937229	0.45344	Others
FBgn0264365	lncRNA:CR43817	14462796	Promoter (<=1kb)	317	chr2L	18805773	18805888	116	169.648	3.34436	72	1	18805445	18806205	761	2	FBtr0332208	Others	Others	Others	Others	Others	Others	Others	Others	Others	Others	NA	NA	NA	Others
FBgn0040992	CG10570	50466	Promoter (1-2kb)	1760	chr2L	18809065	18809226	162	290.084	4.10745	91	1	18808694	18810986	2293	2	FBtr0345442	Others	Others	Others	Others	Others	Others	Others	Others	Others	Others	NA	NA	NA	Others
FBgn0032713	Ugt36D1	35138	Promoter (<=1kb)	-381	chr2L	18822838	18823167	330	245.733	4.10745	165	1	18823548	18826553	3006	1	FBtr0081104	Others	Others	Others	Others	Others	Others	Others	Others	Others	Others	NA	-0.213662	0.0451392	Others
FBgn0032715	CG17597	35140	Promoter (<=1kb)	-59	chr2L	18830712	18830911	200	279.074	4.10745	97	1	18829012	18830653	1642	2	FBtr0081121	Mitochondria	Others	Others	Others	Others	Others	Others	Others	Others	Others	NA	-1.17783	5.62e-88	MitoOthers
FBgn0015808	ScpX	44183	Promoter (<=1kb)	0	chr2L	18831023	18831261	239	223.304	4.10745	173	1	18831229	18833630	2402	1	FBtr0081109	Mitochondria	Others	Others	Others	Others	Others	Others	Others	Others	Others	NA	-0.420618	3.18e-08	MitoOthers
FBgn0032717	CG10600	35142	Promoter (<=1kb)	0	chr2L	18839635	18839913	279	1086.04	4.10745	131	1	18833710	18839679	5970	2	FBtr0081120	Others	Others	Others	Others	Others	Others	Others	Others	Others	Others	NA	0.554168	0.000125731	Others
FBgn0032721	CG10602	35146	Promoter (<=1kb)	0	chr2L	18857643	18857926	284	989.327	4.10745	131	1	18855126	18857679	2554	2	FBtr0089314	Others	Others	Others	Others	Others	Others	Others	Others	Others	Others	NA	-1.60936	9.16e-152	Others
FBgn0032720	mRpL13	35145	Promoter (<=1kb)	0	chr2L	18859198	18859440	243	667.844	4.10745	131	1	18858028	18859248	1221	2	FBtr0089318	Mitochondria	Others	Others	Others	Translation_mito	Others	Others	Others	Others	Others	NA	-1.52224	1.63e-21	Mito_EBR
FBgn0263568	mir-4946	12798014	Promoter (2-3kb)	2694	chr2L	18864138	18864467	330	210.751	3.63538	165	1	18867046	18867161	116	2	FBtr0309718	Others	Others	Others	Others	Others	Others	Others	Others	Others	Others	NA	NA	NA	Others
FBgn0265950	lncRNA:CR44737	19835510	Distal Intergenic	-4030	chr2L	18889472	18889581	110	165.213	3.15663	61	1	18893611	18896798	3188	1	FBtr0342920	Others	Others	Others	Others	Others	Others	Others	Others	Others	Others	NA	NA	NA	Others
FBgn0265950	lncRNA:CR44737	19835510	Distal Intergenic	-3212	chr2L	18890148	18890399	252	1162.91	4.10745	133	1	18893611	18896798	3188	1	FBtr0342920	Others	Others	Others	Others	Others	Others	Others	Others	Others	Others	NA	NA	NA	Others
FBgn0265950	lncRNA:CR44737	19835510	Promoter (1-2kb)	1535	chr2L	18895146	18895267	122	182.251	3.68702	82	1	18893611	18896798	3188	1	FBtr0342920	Others	Others	Others	Others	Others	Others	Others	Others	Others	Others	NA	NA	NA	Others
FBgn0265952	lncRNA:CR44739	19835924	Promoter (<=1kb)	902	chr2L	18899342	18899592	251	867.974	4.10745	121	1	18899564	18900494	931	2	FBtr0342930	Others	Others	Others	Others	Others	Others	Others	Others	Others	Others	NA	NA	NA	Others
FBgn0265952	lncRNA:CR44739	19835924	Promoter (<=1kb)	313	chr2L	18899990	18900181	192	398.281	4.10745	75	1	18899564	18900494	931	2	FBtr0342930	Others	Others	Others	Others	Others	Others	Others	Others	Others	Others	NA	NA	NA	Others
FBgn0265951	lncRNA:CR44738	19834994	Distal Intergenic	7871	chr2L	18913995	18914126	132	220.142	4.10745	34	1	18906124	18906747	624	1	FBtr0342922	Others	Others	Others	Others	Others	Others	Others	Others	Others	Others	NA	NA	NA	Others
FBgn0265951	lncRNA:CR44738	19834994	Intron (FBtr0342929/FBgn0032723, intron 6 of 10)	15224	chr2L	18921348	18921535	188	404.53	4.10745	102	1	18906124	18906747	624	1	FBtr0342922	Others	Others	Others	Others	Others	Others	Others	Others	Others	Others	NA	NA	NA	Others
FBgn0032723	ssp3	35149	Intron (FBtr0342929/FBgn0032723, intron 6 of 10)	17893	chr2L	18925738	18926067	330	159.511	2.93197	165	1	18916347	18943960	27614	2	FBtr0342929	Others	Others	Others	Others	Others	Others	Others	Others	Others	Others	NA	-0.0711331	0.808084	Others
FBgn0032723	ssp3	35149	Intron (FBtr0342929/FBgn0032723, intron 6 of 10)	12890	chr2L	18930876	18931070	195	452.304	4.10745	84	1	18916347	18943960	27614	2	FBtr0342929	Others	Others	Others	Others	Others	Others	Others	Others	Others	Others	NA	-0.0711331	0.808084	Others
FBgn0032723	ssp3	35149	Promoter (<=1kb)	0	chr2L	18943820	18944149	330	204.517	3.64787	165	1	18916347	18943960	27614	2	FBtr0342929	Others	Others	Others	Others	Others	Others	Others	Others	Others	Others	NA	-0.0711331	0.808084	Others
FBgn0265953	lncRNA:CR44740	19836194	Promoter (<=1kb)	-665	chr2L	18944706	18945035	330	210.615	3.63592	165	1	18945700	18946154	455	1	FBtr0342923	Others	Others	Others	Others	Others	Others	Others	Others	Others	Others	NA	NA	NA	Others
FBgn0032724	CG10428	35150	Promoter (<=1kb)	-512	chr2L	18948202	18948372	171	354.74	4.10745	122	1	18948884	18950973	2090	1	FBtr0081132	Others	Others	Others	Others	Others	Others	Others	Others	Others	Others	NA	0.00880812	0.982942	Others
FBgn0032724	CG10428	35150	Promoter (<=1kb)	0	chr2L	18948812	18948904	93	205.821	3.64552	72	1	18948884	18950973	2090	1	FBtr0081132	Others	Others	Others	Others	Others	Others	Others	Others	Others	Others	NA	0.00880812	0.982942	Others
FBgn0032725	Nedd8	35151	Promoter (<=1kb)	0	chr2L	18951758	18951965	208	462.717	4.10745	105	1	18951006	18951837	832	2	FBtr0342928	Others	Others	Others	Others	Others	Others	Others	Others	Others	Others	NA	-1.3867	3.16e-20	Others
FBgn0032728	Tango6	35155	Promoter (<=1kb)	0	chr2L	18968797	18969126	330	173.813	3.48147	165	1	18969028	18972004	2977	1	FBtr0081133	Others	Others	Others	Others	Others	Others	Others	Others	Others	Others	NA	-0.345296	0.0960717	Others
FBgn0032730	CG10431	35157	Promoter (<=1kb)	-32	chr2L	18974495	18974678	184	263.681	4.10745	97	1	18974710	18977502	2793	1	FBtr0340317	Others	Others	Others	Others	Others	Others	Others	Others	Others	Others	Others	0.143777	0.76771	Others
FBgn0032731	Swip-1	35158	Intron (FBtr0340322/FBgn0032731, intron 1 of 1)	5925	chr2L	18981026	18981355	330	166.526	3.24174	165	1	18977519	18987280	9762	2	FBtr0340322	Mitochondria	Others	Others	Others	Others	Others	Others	Others	Others	Others	NA	0.81597	5.83e-09	MitoOthers
FBgn0032731	Swip-1	35158	Intron (FBtr0340322/FBgn0032731, intron 1 of 1)	5398	chr2L	18981553	18981882	330	156.774	2.89466	165	1	18977519	18987280	9762	2	FBtr0340322	Mitochondria	Others	Others	Others	Others	Others	Others	Others	Others	Others	NA	0.81597	5.83e-09	MitoOthers
FBgn0086710	RpL30	44059	Promoter (<=1kb)	0	chr2L	19009108	19009535	428	2029.39	4.10745	242	1	19008031	19009237	1207	2	FBtr0340319	Others	Others	Others	Others	Others	Others	Others	Others	Others	Others	NA	-0.669771	6.32e-15	Others
FBgn0266830	lncRNA:CR45292	19835173	Promoter (<=1kb)	412	chr2L	19012314	19012567	254	778.443	4.10745	120	1	19011902	19012254	353	1	FBtr0345558	Others	Others	Others	Others	Others	Others	Others	Others	Others	Others	NA	NA	NA	Others
FBgn0266830	lncRNA:CR45292	19835173	Promoter (2-3kb)	2808	chr2L	19014710	19014791	82	159.295	2.93245	35	1	19011902	19012254	353	1	FBtr0345558	Others	Others	Others	Others	Others	Others	Others	Others	Others	Others	NA	NA	NA	Others
FBgn0032740	CG15172	35167	Promoter (<=1kb)	-310	chr2L	19021862	19022107	246	325.305	4.10745	97	1	19022417	19023644	1228	1	FBtr0081140	Others	Others	Others	Others	Others	Others	Others	Others	Others	Others	NA	-4.03965	0.0966512	Others
FBgn0263838	lncRNA:CR43700	14462798	Promoter (<=1kb)	-6	chr2L	19024446	19024775	330	197.718	3.65995	165	1	19023671	19024440	770	2	FBtr0321273	Others	Others	Others	Others	Others	Others	Others	Others	Others	Others	NA	NA	NA	Others
FBgn0032741	Sidpn	35168	Promoter (<=1kb)	-632	chr2L	19026749	19027078	330	233.315	4.10745	165	1	19027710	19030780	3071	1	FBtr0081141	Others	Others	Others	Others	Others	Others	Others	Others	Others	Others	Others	0.606273	0.0378214	Others
FBgn0086442	mib2	35170	Promoter (<=1kb)	0	chr2L	19034622	19034735	114	302.628	4.10745	13	1	19034641	19041473	6833	1	FBtr0336840	Others	Others	Others	Others	Others	Others	Others	Others	Others	Others	NA	-0.0141281	0.875189	Others
FBgn0002022	Catsup	48805	Promoter (<=1kb)	0	chr2L	19041643	19041972	330	152.903	2.70837	165	1	19041862	19043614	1753	1	FBtr0081143	Others	Others	Others	Others	Others	Others	Others	Others	Others	Others	NA	-0.771645	1.91e-42	Others
FBgn0032744	Ttc19	35172	Promoter (<=1kb)	0	chr2L	19045129	19045430	302	795.633	4.10745	167	1	19043535	19045148	1614	2	FBtr0081178	Mitochondria	Others	Others	Others	Others	Others	Others	Others	Others	Others	NA	0.330543	0.0396333	MitoOthers
FBgn0032746	CG10470	35174	Promoter (<=1kb)	0	chr2L	19048942	19049271	330	185.67	3.68024	165	1	19049076	19049884	809	1	FBtr0081146	Others	Others	Others	Others	Others	Others	Others	Others	Others	Others	NA	-1.51162	7.59e-59	Others
FBgn0261396	Rpn3	35176	Promoter (<=1kb)	0	chr2L	19051680	19051891	212	579.954	4.10745	85	1	19051790	19053681	1892	1	FBtr0302289	Others	Others	Others	Others	Others	Others	Others	Others	Others	Others	NA	-0.868791	2.57e-56	Others
FBgn0032754	CG10700	35183	Promoter (<=1kb)	-731	chr2L	19079759	19080088	330	229.285	4.10745	165	1	19077276	19079028	1753	2	FBtr0081171	Mitochondria	Others	Others	Others	Others	Others	Others	Others	Others	Others	NA	0.610694	0.514089	MitoOthers
FBgn0002023	Lim3	35184	Intron (FBtr0309833/FBgn0002023, intron 1 of 6)	-8078	chr2L	19091400	19091570	171	274.314	4.10745	85	1	19079256	19083322	4067	2	FBtr0081170	Others	Others	Others	Others	Others	Others	Others	Others	Others	Others	Others	0.692994	0.00221865	Others
FBgn0002036	CG10561	35189	Promoter (<=1kb)	0	chr2L	19114174	19114503	330	308.082	4.10745	165	1	19114401	19116570	2170	1	FBtr0081155	Others	Others	Others	Others	Others	Others	Others	Others	Others	Others	NA	-0.624738	0.00062732	Others
FBgn0086447	l(2)37Cg	35196	Promoter (<=1kb)	-65	chr2L	19133548	19133741	194	350.905	4.10745	100	1	19133023	19133483	461	2	FBtr0081161	Others	Others	Others	Others	Others	Others	Others	Others	Others	Others	NA	-1.68668	1.11e-05	Others
FBgn0086447	l(2)37Cg	35196	Promoter (<=1kb)	-882	chr2L	19136115	19136257	143	229.285	4.10745	78	1	19133023	19135233	2211	2	FBtr0336628	Others	Others	Others	Others	Others	Others	Others	Others	Others	Others	NA	-1.68668	1.11e-05	Others
FBgn0086447	l(2)37Cg	35196	Promoter (1-2kb)	-1610	chr2L	19136843	19136941	99	242.842	4.10745	72	1	19133023	19135233	2211	2	FBtr0336628	Others	Others	Others	Others	Others	Others	Others	Others	Others	Others	NA	-1.68668	1.11e-05	Others
FBgn0086447	l(2)37Cg	35196	Intron (FBtr0081158/FBgn0010300, intron 1 of 3)	-3153	chr2L	19138386	19138715	330	155.687	2.85794	165	1	19133023	19135233	2211	2	FBtr0336628	Others	Others	Others	Others	Others	Others	Others	Others	Others	Others	NA	-1.68668	1.11e-05	Others
FBgn0086447	l(2)37Cg	35196	Intron (FBtr0081158/FBgn0010300, intron 1 of 3)	-5663	chr2L	19140896	19141225	330	292.395	4.10745	165	1	19133023	19135233	2211	2	FBtr0336628	Others	Others	Others	Others	Others	Others	Others	Others	Others	Others	NA	-1.68668	1.11e-05	Others
FBgn0086447	l(2)37Cg	35196	Intron (FBtr0081158/FBgn0010300, intron 1 of 3)	-6609	chr2L	19141842	19142021	180	331.188	4.10745	72	1	19133023	19135233	2211	2	FBtr0336628	Others	Others	Others	Others	Others	Others	Others	Others	Others	Others	NA	-1.68668	1.11e-05	Others
FBgn0010300	brat	35197	Intron (FBtr0081158/FBgn0010300, intron 2 of 3)	-3345	chr2L	19154866	19155195	330	157.894	2.93596	165	1	19158540	19172567	14028	1	FBtr0081159	Others	Others	Others	Others	Others	Others	Others	Others	Others	Others	NA	0.774134	2.68e-18	Others
FBgn0010300	brat	35197	Promoter (<=1kb)	0	chr2L	19158407	19158736	330	243.133	4.10745	165	1	19158540	19172567	14028	1	FBtr0081159	Others	Others	Others	Others	Others	Others	Others	Others	Others	Others	NA	0.774134	2.68e-18	Others
FBgn0010300	brat	35197	Promoter (<=1kb)	-580	chr2L	19165012	19165287	276	1285.18	4.10745	145	1	19165867	19172567	6701	1	FBtr0344846	Others	Others	Others	Others	Others	Others	Others	Others	Others	Others	NA	0.774134	2.68e-18	Others
FBgn0032763	CG17568	35198	Promoter (<=1kb)	-25	chr2L	19181727	19181878	152	443.718	4.10745	87	1	19179749	19181702	1954	2	FBtr0081233	Others	Others	Others	Others	Others	Others	Others	Others	Others	Others	Others	0.504255	0.0409592	Others
FBgn0010309	pigeon	35200	Promoter (<=1kb)	0	chr2L	19185931	19186109	179	314.053	4.10745	98	1	19186043	19189938	3896	1	FBtr0081194	Others	Others	Others	Others	Others	Others	Others	Others	Others	Others	NA	0.425738	0.0151932	Others
FBgn0015380	drl	44355	Promoter (<=1kb)	0	chr2L	19190237	19190566	330	295.873	4.10745	165	1	19190342	19208621	18280	1	FBtr0081195	Others	Others	Others	Others	Others	Others	Others	Others	Others	Others	NA	0.977756	3.14e-07	Others
FBgn0015380	drl	44355	Promoter (1-2kb)	1557	chr2L	19191899	19192228	330	219.02	4.10745	165	1	19190342	19208621	18280	1	FBtr0330209	Others	Others	Others	Others	Others	Others	Others	Others	Others	Others	NA	0.977756	3.14e-07	Others
FBgn0015380	drl	44355	Intron (FBtr0081195/FBgn0015380, intron 1 of 3)	3499	chr2L	19193841	19193951	111	232.63	4.10745	35	1	19190342	19208621	18280	1	FBtr0330209	Others	Others	Others	Others	Others	Others	Others	Others	Others	Others	NA	0.977756	3.14e-07	Others
FBgn0015380	drl	44355	Intron (FBtr0081195/FBgn0015380, intron 1 of 3)	6387	chr2L	19196729	19196962	234	798.985	4.10745	121	1	19190342	19208621	18280	1	FBtr0330209	Others	Others	Others	Others	Others	Others	Others	Others	Others	Others	NA	0.977756	3.14e-07	Others
FBgn0015380	drl	44355	Intron (FBtr0081195/FBgn0015380, intron 1 of 3)	10000	chr2L	19200342	19200477	136	168.922	3.3461	83	1	19190342	19208621	18280	1	FBtr0330209	Others	Others	Others	Others	Others	Others	Others	Others	Others	Others	NA	0.977756	3.14e-07	Others
FBgn0265078	lncRNA:CR44189	14462801	Promoter (2-3kb)	2127	chr2L	19219534	19219702	169	375.266	4.10745	76	1	19217407	19218135	729	1	FBtr0336815	Others	Others	Others	Others	Others	Others	Others	Others	Others	Others	NA	NA	NA	Others
FBgn0265078	lncRNA:CR44189	14462801	Distal Intergenic	8997	chr2L	19226404	19226661	258	1140.06	4.10745	123	1	19217407	19218135	729	1	FBtr0336815	Others	Others	Others	Others	Others	Others	Others	Others	Others	Others	NA	NA	NA	Others
FBgn0265078	lncRNA:CR44189	14462801	Distal Intergenic	16013	chr2L	19233420	19233570	151	294.592	4.10745	90	1	19217407	19218135	729	1	FBtr0336815	Others	Others	Others	Others	Others	Others	Others	Others	Others	Others	NA	NA	NA	Others
FBgn0051797	CG31797	35203	Distal Intergenic	9575	chr2L	19252521	19252665	145	209.18	3.63799	59	1	19259432	19262240	2809	2	FBtr0081227	Others	Others	Others	Others	Others	Others	Others	Others	Others	Others	NA	NA	NA	Others
FBgn0265079	lncRNA:CR44190	14462803	Distal Intergenic	-12731	chr2L	19285592	19285768	177	292.192	4.10745	116	1	19269114	19272861	3748	2	FBtr0336821	Others	Others	Others	Others	Others	Others	Others	Others	Others	Others	NA	NA	NA	Others
FBgn0267264	lncRNA:CR45700	19835140	Distal Intergenic	-9213	chr2L	19313396	19313725	330	149.963	2.56011	165	1	19322938	19326106	3169	1	FBtr0346479	Others	Others	Others	Others	Others	Others	Others	Others	Others	Others	NA	NA	NA	Others
FBgn0266796	lncRNA:CR45258	19835692	Promoter (1-2kb)	-1667	chr2L	19325515	19325700	186	382.711	4.10745	110	1	19327367	19327963	597	1	FBtr0345452	Others	Others	Others	Others	Others	Others	Others	Others	Others	Others	NA	NA	NA	Others
FBgn0266796	lncRNA:CR45258	19835692	Distal Intergenic	7775	chr2L	19335142	19335471	330	232.629	4.10745	165	1	19327367	19327963	597	1	FBtr0345452	Others	Others	Others	Others	Others	Others	Others	Others	Others	Others	NA	NA	NA	Others
FBgn0266796	lncRNA:CR45258	19835692	Intron (FBtr0336820/FBgn0024245, intron 1 of 3)	14719	chr2L	19342086	19342305	220	721.063	4.10745	129	1	19327367	19327963	597	1	FBtr0345452	Others	Others	Others	Others	Others	Others	Others	Others	Others	Others	NA	NA	NA	Others
FBgn0024245	dnt	35207	Intron (FBtr0336820/FBgn0024245, intron 1 of 3)	4753	chr2L	19358235	19358474	240	473.255	4.10745	151	1	19338669	19363227	24559	2	FBtr0336820	Others	Others	Others	Others	Others	Others	Others	Others	Others	Others	NA	-0.29971	0.142455	Others
FBgn0024245	dnt	35207	Promoter (1-2kb)	1207	chr2L	19361691	19362020	330	275.896	4.10745	165	1	19338669	19363227	24559	2	FBtr0336820	Others	Others	Others	Others	Others	Others	Others	Others	Others	Others	NA	-0.29971	0.142455	Others
FBgn0024245	dnt	35207	Promoter (<=1kb)	-357	chr2L	19363584	19363913	330	210.759	3.63525	165	1	19338678	19363227	24550	2	FBtr0081224	Others	Others	Others	Others	Others	Others	Others	Others	Others	Others	NA	-0.29971	0.142455	Others
FBgn0032771	CG17349	35209	Promoter (<=1kb)	-14	chr2L	19370212	19370431	220	379.98	4.10745	91	1	19370445	19372711	2267	1	FBtr0081198	Others	Others	Others	Others	Others	Others	Others	Others	Others	Others	NA	-2.26902	0.53756	Others
FBgn0032772	CG17350	35210	Distal Intergenic	-4482	chr2L	19376247	19376448	202	514.383	4.10745	102	1	19380930	19383093	2164	1	FBtr0081199	Others	Others	Others	Others	Others	Others	Others	Others	Others	Others	NA	2.43932	1.92e-13	Others
FBgn0032772	CG17350	35210	Distal Intergenic	-3202	chr2L	19377528	19377728	201	386.48	4.10745	63	1	19380930	19383093	2164	1	FBtr0081199	Others	Others	Others	Others	Others	Others	Others	Others	Others	Others	NA	2.43932	1.92e-13	Others
FBgn0032775	CG17544	35213	Promoter (<=1kb)	494	chr2L	19397670	19397999	330	166.78	3.24097	165	1	19390370	19398493	8124	2	FBtr0081216	Others	Others	Others	Others	Others	Others	Others	Others	Others	Others	NA	-0.730621	1.05e-08	Others
FBgn0032775	CG17544	35213	Promoter (<=1kb)	0	chr2L	19398479	19398808	330	167.425	3.2398	165	1	19390370	19398493	8124	2	FBtr0081216	Others	Others	Others	Others	Others	Others	Others	Others	Others	Others	NA	-0.730621	1.05e-08	Others
FBgn0041789	Pax	35215	Promoter (<=1kb)	-126	chr2L	19416596	19416831	236	1073.5	4.10745	126	1	19400781	19416470	15690	2	FBtr0081212	Others	Others	Others	Others	Others	Others	Others	Others	Others	Others	NA	-1.3013	1.89e-200	Others
FBgn0032779	Alp12	35218	Promoter (<=1kb)	-86	chr2L	19423639	19423964	326	706.606	4.10745	140	1	19424050	19429224	5175	1	FBtr0302938	Others	Others	Others	Others	Others	Others	Others	Others	Others	Others	NA	-0.635553	7.39e-07	Others
FBgn0032780	CG13085	35219	Promoter (<=1kb)	147	chr2L	19424197	19424526	330	150.704	2.59726	165	1	19424050	19430270	6221	1	FBtr0335465	Others	Others	Others	Others	Others	Others	Others	Others	Others	Others	NA	-1.18007	0.0121747	Others
FBgn0032779	Alp12	35218	Promoter (<=1kb)	-311	chr2L	19425821	19425987	167	365.82	4.10745	137	1	19426298	19429224	2927	1	FBtr0334164	Others	Others	Others	Others	Others	Others	Others	Others	Others	Others	NA	-0.635553	7.39e-07	Others
FBgn0041789	Pax	35215	Promoter (<=1kb)	0	chr2L	19426548	19426877	330	449.152	4.10745	165	1	19400781	19426596	25816	2	FBtr0081210	Others	Others	Others	Others	Others	Others	Others	Others	Others	Others	NA	-1.3013	1.89e-200	Others
FBgn0032781	RtcB	35220	Promoter (<=1kb)	-47	chr2L	19430386	19430596	211	448.838	4.10745	117	1	19430643	19432444	1802	1	FBtr0081205	Others	Others	Others	Others	Others	Others	Others	Others	Others	Others	NA	-0.656014	5.51e-14	Others
FBgn0032782	Rab9	35221	Promoter (1-2kb)	1802	chr2L	19434376	19434572	197	453.533	4.10745	104	1	19432574	19435841	3268	1	FBtr0081206	Others	Others	Others	Others	Others	Others	Others	Others	Others	Others	NA	-0.504757	0.0110723	Others
FBgn0032783	CG10237	35222	Promoter (<=1kb)	-18	chr2L	19438984	19439313	330	142.071	2.38526	165	1	19435850	19438966	3117	2	FBtr0334176	Others	Others	Others	Others	Others	Others	Others	Others	Others	Others	NA	0.648824	5.13e-07	Others
FBgn0032783	CG10237	35222	Promoter (<=1kb)	-633	chr2L	19439599	19439865	267	1097.92	4.10745	124	1	19435850	19438966	3117	2	FBtr0334176	Others	Others	Others	Others	Others	Others	Others	Others	Others	Others	NA	0.648824	5.13e-07	Others
FBgn0003346	RanGAP	35223	Promoter (<=1kb)	0	chr2L	19444706	19445058	353	1519.15	4.10745	192	1	19445048	19447317	2270	1	FBtr0334174	Others	Others	Others	Others	Others	Others	Others	Others	Others	Others	NA	-1.75214	5.4e-42	Others
FBgn0284220	Top2	35225	Promoter (<=1kb)	0	chr2L	19453439	19453730	292	1227.77	4.10745	132	1	19447365	19453490	6126	2	FBtr0332320	Others	Others	Others	Others	Others	Others	Others	Others	Others	Others	NA	-1.49096	1.15e-41	Others
FBgn0002044	swm	35235	Promoter (<=1kb)	0	chr2L	19493010	19493339	330	149.595	2.52545	165	1	19493251	19497835	4585	1	FBtr0081244	Others	Others	Others	Others	Others	Others	Others	Others	Others	Others	NA	-0.0958672	0.428033	Others
FBgn0032797	Hasp	35238	Promoter (<=1kb)	-217	chr2L	19517421	19517553	133	241.73	4.10745	94	1	19510117	19517204	7088	2	FBtr0081281	Others	Others	Others	Others	Others	Others	Others	Others	Others	Others	NA	0.745956	5.67e-07	Others
FBgn0032800	CG10137	35241	Promoter (<=1kb)	0	chr2L	19526379	19526708	330	230.405	4.10745	165	1	19526686	19532985	6300	1	FBtr0081248	Others	Others	Others	Others	Others	Others	Others	Others	Others	Others	NA	0.670734	0.0104931	Others
FBgn0032801	CG10165	35242	Promoter (<=1kb)	-70	chr2L	19528393	19528632	240	784.089	4.10745	130	1	19527281	19528323	1043	2	FBtr0344843	Others	Others	Others	Others	Others	Others	Others	Others	Others	Others	NA	-0.565184	6.42e-07	Others
FBgn0032801	CG10165	35242	Promoter (<=1kb)	0	chr2L	19530161	19530490	330	175.366	3.47865	165	1	19526910	19530305	3396	2	FBtr0303779	Others	Others	Others	Others	Others	Others	Others	Others	Others	Others	NA	-0.565184	6.42e-07	Others
FBgn0053116	CG33116	326259	Promoter (<=1kb)	0	chr2L	19533259	19533537	279	629.147	4.10745	154	1	19533479	19537363	3885	1	FBtr0081249	Others	Others	Others	Others	Others	Others	Others	Others	Others	Others	NA	-0.437679	2.92e-06	Others
FBgn0003231	ref(2)P	35246	Promoter (<=1kb)	0	chr2L	19542289	19542468	180	473.877	4.10745	105	1	19542468	19545458	2991	1	FBtr0081253	Others	Others	Others	Others	Others	Others	Others	Others	Others	Others	NA	1.9271	0	Others
FBgn0032805	CG10337	35247	Promoter (<=1kb)	-281	chr2L	19547240	19547569	330	224.788	4.10745	165	1	19545376	19546959	1584	2	FBtr0081276	Others	Others	Others	Others	Others	Others	Others	Others	Others	Others	NA	1.20203	9.18e-19	Others
FBgn0032805	CG10337	35247	Promoter (<=1kb)	-588	chr2L	19547547	19547710	164	146.022	2.46987	58	1	19545376	19546959	1584	2	FBtr0081276	Others	Others	Others	Others	Others	Others	Others	Others	Others	Others	NA	1.20203	9.18e-19	Others
FBgn0005672	spi	35253	Promoter (<=1kb)	355	chr2L	19571926	19572255	330	158.54	2.93415	165	1	19567900	19572610	4711	2	FBtr0081269	Others	Others	Others	Others	Others	Others	Others	Others	Others	Others	NA	0.751518	1.12e-24	Others
FBgn0005672	spi	35253	Promoter (<=1kb)	-214	chr2L	19572824	19573007	184	394.378	4.10745	81	1	19567900	19572610	4711	2	FBtr0081270	Others	Others	Others	Others	Others	Others	Others	Others	Others	Others	NA	0.751518	1.12e-24	Others
FBgn0005672	spi	35253	Promoter (<=1kb)	-2	chr2L	19575589	19576040	452	1207.26	4.10745	163	1	19567900	19575587	7688	2	FBtr0100597	Others	Others	Others	Others	Others	Others	Others	Others	Others	Others	NA	0.751518	1.12e-24	Others
FBgn0032811	CG10268	35255	Promoter (<=1kb)	0	chr2L	19580258	19580587	330	317.491	4.10745	165	1	19579093	19580351	1259	2	FBtr0081266	Others	Others	Others	Others	Others	Others	Others	Others	Others	Others	NA	0.20022	0.129416	Others
FBgn0032812	Hakai	35256	Promoter (<=1kb)	0	chr2L	19582244	19582573	330	279.396	4.10745	165	1	19580612	19582474	1863	2	FBtr0081263	Others	Others	Others	Others	Others	Others	Others	Others	Others	Others	NA	0.317293	0.19843	Others
FBgn0032813	PCNA2	35257	Promoter (<=1kb)	0	chr2L	19583986	19584278	293	794.821	4.10745	140	1	19582823	19583990	1168	2	FBtr0081262	Others	Others	Others	Others	Others	Others	Others	Others	Others	Others	NA	0.0499115	0.920416	Others
FBgn0000464	Lar	35259	Promoter (<=1kb)	0	chr2L	19587087	19587284	198	381.084	4.10745	124	1	19587226	19731561	144336	1	FBtr0331241	Others	Others	Others	Others	Others	Others	Others	Others	Others	Others	NA	1.12647	9.25e-14	Others
FBgn0266314	lncRNA:CR44979	19834906	Intron (FBtr0331242/FBgn0000464, intron 3 of 18)	12960	chr2L	19629312	19629641	330	162.337	3.02768	165	1	19642330	19642601	272	2	FBtr0344044	Others	Others	Others	Others	Others	Others	Others	Others	Others	Others	NA	NA	NA	Others
FBgn0032818	CG10628	35263	Promoter (<=1kb)	0	chr2L	19758553	19758878	326	1668.53	4.10745	162	1	19757245	19758615	1371	2	FBtr0081323	Mitochondria	Others	Others	Others	Others	Others	Others	Others	Others	Others	NA	-0.724798	8.02e-05	MitoOthers
FBgn0032821	CdGAPr	35267	Promoter (<=1kb)	0	chr2L	19791713	19792042	330	163.852	3.08655	165	1	19774874	19791882	17009	2	FBtr0332179	Others	Others	Others	Others	Others	Others	Others	Others	Others	Others	NA	0.432074	0.00112133	Others
FBgn0004811	fs(2)ltoPP43	49505	Promoter (<=1kb)	0	chr2L	19795764	19796025	262	611.389	4.10745	131	1	19792773	19795851	3079	2	FBtr0081316	Others	Others	Others	Others	Others	Others	Others	Others	Others	Others	NA	0.294018	0.0581973	Others
FBgn0263873	sick	35277	Intron (FBtr0329838/FBgn0263873, intron 1 of 15)	3686	chr2L	19800051	19800239	189	294.963	4.10745	92	1	19796365	19958424	162060	1	FBtr0329838	Others	Others	Others	Others	Others	Others	Others	Others	Others	Others	NA	1.0035	1.09e-15	Others
FBgn0263873	sick	35277	Intron (FBtr0329838/FBgn0263873, intron 1 of 15)	4394	chr2L	19800759	19801088	330	160.682	2.9778	165	1	19796365	19958424	162060	1	FBtr0329838	Others	Others	Others	Others	Others	Others	Others	Others	Others	Others	NA	1.0035	1.09e-15	Others
FBgn0043021	snRNA:U5:38ABb	3772339	Promoter (<=1kb)	821	chr2L	19817235	19817393	159	292.35	4.10745	86	1	19816414	19816540	127	1	FBtr0081294	Others	Others	Others	Others	Others	Others	Others	Others	Others	Others	NA	NA	NA	Others
FBgn0263873	sick	35277	Promoter (<=1kb)	-394	chr2L	19865471	19865787	317	1907.86	4.10745	162	1	19866181	19958424	92244	1	FBtr0336736	Others	Others	Others	Others	Others	Others	Others	Others	Others	Others	NA	1.0035	1.09e-15	Others
FBgn0263873	sick	35277	Promoter (<=1kb)	761	chr2L	19866942	19867271	330	280.822	4.10745	165	1	19866181	19958424	92244	1	FBtr0336736	Others	Others	Others	Others	Others	Others	Others	Others	Others	Others	NA	1.0035	1.09e-15	Others
FBgn0263873	sick	35277	Intron (FBtr0329838/FBgn0263873, intron 3 of 15)	3851	chr2L	19870032	19870270	239	611.048	4.10745	108	1	19866181	19958424	92244	1	FBtr0336736	Others	Others	Others	Others	Others	Others	Others	Others	Others	Others	NA	1.0035	1.09e-15	Others
FBgn0032827	CG10481	35273	Intron (FBtr0329838/FBgn0263873, intron 3 of 15)	7812	chr2L	19884532	19884738	207	451.71	4.10745	97	1	19890201	19892550	2350	2	FBtr0081312	Others	Others	Others	Others	Others	Others	Others	Others	Others	Others	NA	0.195104	0.886207	Others
FBgn0032827	CG10481	35273	Intron (FBtr0329838/FBgn0263873, intron 4 of 15)	4763	chr2L	19887541	19887787	247	613.415	4.10745	112	1	19890201	19892550	2350	2	FBtr0081312	Others	Others	Others	Others	Others	Others	Others	Others	Others	Others	NA	0.195104	0.886207	Others
FBgn0032827	CG10481	35273	Intron (FBtr0329838/FBgn0263873, intron 4 of 15)	3377	chr2L	19888844	19889173	330	187.562	3.6766	165	1	19890201	19892550	2350	2	FBtr0081312	Others	Others	Others	Others	Others	Others	Others	Others	Others	Others	NA	0.195104	0.886207	Others
FBgn0263873	sick	35277	Promoter (<=1kb)	-387	chr2L	19895329	19895658	330	166.952	3.24063	165	1	19896045	19958424	62380	1	FBtr0329840	Others	Others	Others	Others	Others	Others	Others	Others	Others	Others	NA	1.0035	1.09e-15	Others
FBgn0263873	sick	35277	Promoter (2-3kb)	2542	chr2L	19898587	19898916	330	220.856	4.10745	165	1	19896045	19958424	62380	1	FBtr0329843	Others	Others	Others	Others	Others	Others	Others	Others	Others	Others	NA	1.0035	1.09e-15	Others
FBgn0263873	sick	35277	Intron (FBtr0329838/FBgn0263873, intron 4 of 15)	3485	chr2L	19899530	19899859	330	151.698	2.63757	165	1	19896045	19958424	62380	1	FBtr0329843	Others	Others	Others	Others	Others	Others	Others	Others	Others	Others	NA	1.0035	1.09e-15	Others
FBgn0263873	sick	35277	Promoter (<=1kb)	0	chr2L	19935157	19935486	330	256.394	4.10745	165	1	19935253	19958424	23172	1	FBtr0329839	Others	Others	Others	Others	Others	Others	Others	Others	Others	Others	NA	1.0035	1.09e-15	Others
FBgn0263873	sick	35277	Intron (FBtr0329838/FBgn0263873, intron 12 of 15)	6144	chr2L	19941397	19941659	263	787.359	4.10745	124	1	19935253	19958424	23172	1	FBtr0329844	Others	Others	Others	Others	Others	Others	Others	Others	Others	Others	NA	1.0035	1.09e-15	Others
FBgn0032833	COX4	35279	Intron (FBtr0329838/FBgn0263873, intron 12 of 15)	-8758	chr2L	19949626	19949955	330	231.704	4.10745	165	1	19958713	19960004	1292	1	FBtr0081300	Mitochondria	Others	Others	Others	Others	ETC	Others	Others	Others	Others	NA	-1.61064	1.45e-202	Mito_EBR
FBgn0266213	lncRNA:CR44908	19835257	Promoter (1-2kb)	1946	chr2L	19998173	19998502	330	194.913	3.66467	165	1	20000122	20000448	327	2	FBtr0343851	Others	Others	Others	Others	Others	Others	Others	Others	Others	Others	NA	NA	NA	Others
FBgn0264443	CG43861	35284	Promoter (<=1kb)	491	chr2L	20016462	20016791	330	163.161	3.02577	165	1	19968684	20017282	48599	2	FBtr0345432	Others	Others	Others	Others	Others	Others	Others	Others	Others	Others	NA	-0.328096	0.172762	Others
FBgn0014127	barr	35287	Promoter (<=1kb)	0	chr2L	20061329	20061658	330	179.116	3.69352	165	1	20058163	20061370	3208	2	FBtr0343850	Others	Others	Others	Others	Others	Others	Others	Others	Others	Others	NA	-0.562493	0.00323124	Others
FBgn0045064	bwa	250736	Promoter (<=1kb)	0	chr2L	20066244	20066424	181	375.302	4.10745	113	1	20066391	20073719	7329	1	FBtr0081331	Others	Others	Others	Others	Others	Others	Others	Others	Others	Others	NA	1.43351	6.6e-12	Others
FBgn0004374	neb	35293	Promoter (<=1kb)	0	chr2L	20075495	20075787	293	564.656	4.10745	142	1	20075757	20089698	13942	1	FBtr0081332	Others	Others	Others	Others	Others	Others	Others	Others	Others	Others	NA	0.271116	0.513364	Others
FBgn0263773	fok	44380	Promoter (1-2kb)	1261	chr2L	20083480	20083809	330	196.862	3.66147	165	1	20079270	20085070	5801	2	FBtr0310560	Others	Others	Others	Others	Others	Others	Others	Others	Others	Others	NA	1.29014	2.72e-45	Others
FBgn0263773	fok	44380	Promoter (<=1kb)	-78	chr2L	20085148	20085347	200	704.314	4.10745	128	1	20082304	20085070	2767	2	FBtr0310558	Others	Others	Others	Others	Others	Others	Others	Others	Others	Others	NA	1.29014	2.72e-45	Others
FBgn0263773	fok	44380	Promoter (<=1kb)	-245	chr2L	20085315	20085644	330	158.237	2.93511	165	1	20082304	20085070	2767	2	FBtr0310558	Others	Others	Others	Others	Others	Others	Others	Others	Others	Others	NA	1.29014	2.72e-45	Others
FBgn0263773	fok	44380	Promoter (1-2kb)	-1487	chr2L	20086557	20086751	195	364.341	4.10745	78	1	20082304	20085070	2767	2	FBtr0310558	Others	Others	Others	Others	Others	Others	Others	Others	Others	Others	NA	1.29014	2.72e-45	Others
FBgn0032845	CG10747	35295	Promoter (<=1kb)	0	chr2L	20091100	20091572	473	783.198	4.10745	240	1	20089636	20091222	1587	2	FBtr0081341	Others	Others	Others	Others	Others	Others	Others	Others	Others	Others	NA	0.972471	2.93e-06	Others
FBgn0032847	Taf13	35297	Promoter (<=1kb)	0	chr2L	20093830	20094159	330	214.923	4.10745	165	1	20093088	20093849	762	2	FBtr0081340	Others	Others	Others	Others	Others	Others	Others	Others	Others	Others	NA	-0.4167	0.0390625	Others
FBgn0032849	mRpS18B	35299	Promoter (<=1kb)	0	chr2L	20097201	20097326	126	219.391	4.10745	56	1	20096329	20097253	925	2	FBtr0081338	Mitochondria	Others	Others	Others	Translation_mito	Others	Others	Others	Others	Others	NA	-1.51484	2.54e-28	Mito_EBR
FBgn0032850	Kua	35300	Promoter (<=1kb)	398	chr2L	20098256	20098585	330	244.597	4.10745	165	1	20097858	20103375	5518	1	FBtr0081336	Others	Others	Others	Others	Others	Others	Others	Others	Others	Others	NA	0.958488	1.94e-16	Others
FBgn0032853	CG10651	35303	Distal Intergenic	14132	chr2L	20120560	20120791	232	148.509	2.47953	36	1	20133755	20134923	1169	2	FBtr0345683	Others	Others	Others	Others	Others	Others	Others	Others	Others	Others	NA	NA	NA	Others
FBgn0032853	CG10651	35303	Distal Intergenic	13713	chr2L	20120864	20121210	347	975.605	4.10745	208	1	20133755	20134923	1169	2	FBtr0345683	Others	Others	Others	Others	Others	Others	Others	Others	Others	Others	NA	NA	NA	Others
FBgn0032853	CG10651	35303	Distal Intergenic	-13499	chr2L	20148422	20148616	195	407.776	4.10745	132	1	20133805	20134923	1119	2	FBtr0081378	Others	Others	Others	Others	Others	Others	Others	Others	Others	Others	NA	NA	NA	Others
FBgn0260000	CG17570	35410	Promoter (2-3kb)	-2859	chr2L	20267283	20267529	247	821.178	4.10745	125	1	20263419	20264424	1006	2	FBtr0081375	Others	Others	Others	Others	Others	Others	Others	Others	Others	Others	NA	0.87751	1.67e-11	Others
FBgn0040996	CG12617	50470	Distal Intergenic	-7165	chr2L	20287266	20287528	263	699.867	4.10745	157	1	20294693	20295320	628	1	FBtr0081351	Others	Others	Others	Others	Others	Others	Others	Others	Others	Others	NA	NA	NA	Others
FBgn0040996	CG12617	50470	Promoter (<=1kb)	-456	chr2L	20294060	20294237	178	353.237	4.10745	95	1	20294693	20295320	628	1	FBtr0081351	Others	Others	Others	Others	Others	Others	Others	Others	Others	Others	NA	NA	NA	Others
FBgn0003475	spir	45931	Promoter (2-3kb)	2126	chr2L	20313345	20313674	330	154.625	2.82423	165	1	20311219	20348386	37168	1	FBtr0339234	Others	Others	Others	Others	Others	Others	Others	Others	Others	Others	NA	0.832145	3.45e-13	Others
FBgn0263581	lncRNA:CR43606	12798022	Intron (FBtr0307894/FBgn0003475, intron 2 of 7)	-8788	chr2L	20326411	20326614	204	383.158	4.10745	99	1	20316005	20317623	1619	2	FBtr0309806	Others	Others	Others	Others	Others	Others	Others	Others	Others	Others	NA	NA	NA	Others
FBgn0263581	lncRNA:CR43606	12798022	Intron (FBtr0307894/FBgn0003475, intron 2 of 7)	-9873	chr2L	20327496	20327691	196	350.683	4.10745	111	1	20316005	20317623	1619	2	FBtr0309806	Others	Others	Others	Others	Others	Others	Others	Others	Others	Others	NA	NA	NA	Others
FBgn0011638	La	35305	Promoter (<=1kb)	0	chr2L	20349914	20350236	323	976.707	4.10745	151	1	20348393	20350012	1620	2	FBtr0081374	Others	Others	Others	Others	Others	Others	Others	Others	Others	Others	NA	-0.633796	1.41e-23	Others
FBgn0032856	CG16798	35308	Intron (FBtr0081369/FBgn0032857, intron 1 of 1)	-7681	chr2L	20390037	20390366	330	197.366	3.66083	165	1	20376981	20382356	5376	2	FBtr0081371	Others	Others	Others	Others	Others	Others	Others	Others	Others	Others	NA	-3.32045	1.4e-26	Others
FBgn0032857	CG10947	35309	Promoter (<=1kb)	-155	chr2L	20414955	20415153	199	445.464	4.10745	102	1	20385293	20414800	29508	2	FBtr0336750	Others	Others	Others	Others	Others	Others	Others	Others	Others	Others	NA	1.02091	2.29e-05	Others
FBgn0083038	snoRNA:Psi18S-525a	5740508	Promoter (<=1kb)	-238	chr2L	20417781	20418110	330	212.036	3.63263	165	1	20418348	20418481	134	1	FBtr0113539	Others	Others	Others	Others	Others	Others	Others	Others	Others	Others	NA	NA	NA	Others
FBgn0263355	CG31688	35314	Promoter (2-3kb)	2203	chr2L	20431228	20431557	330	201.375	3.65344	165	1	20429025	20447905	18881	1	FBtr0330661	Others	Others	Others	Others	Others	Others	Others	Others	Others	Others	NA	0.558504	0.0139928	Others
FBgn0032864	CG2493	35316	Promoter (<=1kb)	-78	chr2L	20463522	20463851	330	179.546	3.69211	165	1	20461768	20463444	1677	2	FBtr0332970	Others	Others	Others	Others	Others	Others	Others	Others	Others	Others	NA	-0.723814	4.65e-19	Others
FBgn0032864	CG2493	35316	Promoter (1-2kb)	-1054	chr2L	20464498	20464628	131	286.2	4.10745	57	1	20461768	20463444	1677	2	FBtr0332970	Others	Others	Others	Others	Others	Others	Others	Others	Others	Others	NA	-0.723814	4.65e-19	Others
FBgn0262879	lncRNA:CR43234	19835858	Promoter (<=1kb)	-801	chr2L	20479721	20480050	330	206.432	3.64368	165	1	20476711	20478920	2210	2	FBtr0344576	Others	Others	Others	Others	Others	Others	Others	Others	Others	Others	NA	NA	NA	Others
FBgn0054007	CG34007	3885610	Promoter (<=1kb)	-360	chr2L	20494341	20494670	330	230.587	4.10745	165	1	20495030	20495556	527	1	FBtr0100062	Others	Others	Others	Others	Others	Others	Others	Others	Others	Others	NA	-1.56831	0.752559	Others
FBgn0265256	CG44270	19835022	Distal Intergenic	-3718	chr2L	20527123	20527348	226	575.07	4.10745	111	1	20531066	20531833	768	1	FBtr0339236	Others	Others	Others	Others	Others	Others	Others	Others	Others	Others	NA	NA	NA	Others
FBgn0267271	lncRNA:CR45707	19835668	Promoter (<=1kb)	480	chr2L	20539312	20539494	183	307.827	4.10745	84	1	20539393	20539974	582	2	FBtr0346485	Others	Others	Others	Others	Others	Others	Others	Others	Others	Others	NA	NA	NA	Others
FBgn0051677	CG31677	318880	Intron (FBtr0343861/FBgn0266214, intron 3 of 4)	6199	chr2L	20597907	20597997	91	209.097	3.63832	14	1	20603535	20604196	662	2	FBtr0081407	Others	Others	Others	Others	Others	Others	Others	Others	Others	Others	NA	NA	NA	Others
FBgn0262688	NA	NA	Promoter (<=1kb)	-268	chr2L	20638577	20638747	171	436.155	4.10745	88	1	20639015	20639578	564	1	FBtr0305612	Others	Others	Others	Others	Others	Others	Others	Others	Others	Others	NA	NA	NA	Others
FBgn0016054	phr6-4	35322	Promoter (<=1kb)	0	chr2L	20645402	20645735	334	591.642	4.10745	145	1	20643351	20645457	2107	2	FBtr0336829	Mitochondria	Others	Others	Others	Others	Others	Others	Others	Others	Others	NA	-2.34207	3.02e-09	MitoOthers
FBgn0259936	Uhg3	3772557	Promoter (<=1kb)	0	chr2L	20647433	20647551	119	264.582	4.10745	65	1	20647533	20648848	1316	1	FBtr0081385	Others	Others	Others	Others	Others	Others	Others	Others	Others	Others	NA	0.897293	8.91e-08	Others
FBgn0032871	CG2611	35324	Promoter (<=1kb)	-66	chr2L	20649950	20650123	174	429.83	4.10745	112	1	20650189	20650898	710	1	FBtr0081387	Others	Others	Others	Others	Others	Others	Others	Others	Others	Others	NA	-0.684593	0.00480701	Others
FBgn0086657	IKKepsilon	35329	Promoter (<=1kb)	0	chr2L	20675991	20676197	207	412.835	4.10745	83	1	20676045	20678979	2935	1	FBtr0336824	Others	Others	Others	Others	Others	Others	Others	Others	Others	Others	NA	-0.264589	0.0209604	Others
FBgn0032876	Cen	35330	Promoter (<=1kb)	0	chr2L	20681655	20682088	434	556.647	4.10745	240	1	20678921	20681846	2926	2	FBtr0081399	Others	Others	Others	Others	Others	Others	Others	Others	Others	Others	NA	0.0554968	0.753085	Others
FBgn0032877	CG2617	35331	Promoter (<=1kb)	0	chr2L	20682237	20682485	249	425.331	4.10745	157	1	20682368	20683429	1062	1	FBtr0336825	Others	Others	Others	Others	Others	Others	Others	Others	Others	Others	NA	-0.351744	0.124966	Others
FBgn0014859	Hr38	35332	Promoter (<=1kb)	-452	chr2L	20715040	20715369	330	147.203	2.4822	165	1	20683462	20714588	31127	2	FBtr0301347	Others	Others	Others	Others	Others	Others	Others	Others	Others	Others	Others	1.6087	4.07e-17	Others
FBgn0014859	Hr38	35332	Promoter (1-2kb)	-1490	chr2L	20716078	20716407	330	145.049	2.45744	165	1	20683462	20714588	31127	2	FBtr0301347	Others	Others	Others	Others	Others	Others	Others	Others	Others	Others	Others	1.6087	4.07e-17	Others
FBgn0266844	lncRNA:CR45306	19835816	Promoter (<=1kb)	-167	chr2L	20721570	20721747	178	332.293	4.10745	100	1	20721914	20722462	549	1	FBtr0345572	Others	Others	Others	Others	Others	Others	Others	Others	Others	Others	NA	NA	NA	Others
FBgn0262743	Fs(2)Ket	35336	Promoter (<=1kb)	0	chr2L	20734684	20735013	330	153.692	2.76237	165	1	20734911	20739764	4854	1	FBtr0081392	Others	Others	Others	Others	Others	Others	Others	Others	Others	Others	NA	0.193997	0.0307024	Others
FBgn0011202	dia	35340	Promoter (<=1kb)	0	chr2L	20758005	20758160	156	170.277	3.34279	126	1	20758144	20767536	9393	1	FBtr0081410	Others	Others	Others	Others	Others	Others	Others	Others	Others	Others	NA	1.08509	4.63e-19	Others
FBgn0011202	dia	35340	Promoter (<=1kb)	-954	chr2L	20759182	20759346	165	229.773	4.10745	90	1	20760300	20762141	1842	1	FBtr0305960	Others	Others	Others	Others	Others	Others	Others	Others	Others	Others	NA	1.08509	4.63e-19	Others
FBgn0011202	dia	35340	Promoter (1-2kb)	1800	chr2L	20762100	20762240	141	155.545	2.82188	95	1	20760300	20766952	6653	1	FBtr0305961	Others	Others	Others	Others	Others	Others	Others	Others	Others	Others	NA	1.08509	4.63e-19	Others
FBgn0000251	cad	35341	Promoter (<=1kb)	0	chr2L	20770423	20770752	330	203.904	3.64885	165	1	20770731	20783135	12405	1	FBtr0081412	Others	Others	Others	Others	Others	Others	Others	Others	Others	Others	Others	0.817201	4.38e-20	Others
FBgn0032884	Pomp	35342	Intron (FBtr0081412/FBgn0000251, intron 1 of 1)	-6584	chr2L	20780831	20781072	242	683.132	4.10745	118	1	20787656	20789098	1443	1	FBtr0081414	Others	Others	Others	Others	Others	Others	Others	Others	Others	Others	NA	-1.34432	9.54e-73	Others
FBgn0032884	Pomp	35342	Promoter (<=1kb)	0	chr2L	20787283	20787702	420	816.475	4.10745	196	1	20787656	20789098	1443	1	FBtr0081414	Others	Others	Others	Others	Others	Others	Others	Others	Others	Others	NA	-1.34432	9.54e-73	Others
FBgn0032886	CG9328	35344	Promoter (<=1kb)	0	chr2L	20797651	20797753	103	336.543	4.10745	34	1	20797715	20814030	16316	1	FBtr0081415	Others	Others	Others	Others	Others	Others	Others	Others	Others	Others	NA	-0.12553	0.486003	Others
FBgn0032886	CG9328	35344	Promoter (2-3kb)	2305	chr2L	20800020	20800209	190	591.441	4.10745	101	1	20797715	20814030	16316	1	FBtr0081415	Others	Others	Others	Others	Others	Others	Others	Others	Others	Others	NA	-0.12553	0.486003	Others
FBgn0032886	CG9328	35344	Intron (FBtr0081415/FBgn0032886, intron 1 of 2)	5132	chr2L	20802847	20803176	330	200.057	3.65562	165	1	20797715	20814030	16316	1	FBtr0081415	Others	Others	Others	Others	Others	Others	Others	Others	Others	Others	NA	-0.12553	0.486003	Others
FBgn0032886	CG9328	35344	Intron (FBtr0081415/FBgn0032886, intron 1 of 2)	-3728	chr2L	20805959	20806246	288	1543.27	4.10745	137	1	20809974	20814331	4358	1	FBtr0081416	Others	Others	Others	Others	Others	Others	Others	Others	Others	Others	NA	-0.12553	0.486003	Others
FBgn0032886	CG9328	35344	Promoter (2-3kb)	-2001	chr2L	20807644	20807973	330	163.663	3.08688	165	1	20809974	20814331	4358	1	FBtr0081416	Others	Others	Others	Others	Others	Others	Others	Others	Others	Others	NA	-0.12553	0.486003	Others
FBgn0032886	CG9328	35344	Promoter (1-2kb)	1409	chr2L	20811383	20811500	118	224.762	4.10745	74	1	20809974	20814331	4358	1	FBtr0081416	Others	Others	Others	Others	Others	Others	Others	Others	Others	Others	NA	-0.12553	0.486003	Others
FBgn0032895	twit	35353	Promoter (<=1kb)	-642	chr2L	20851607	20851936	330	143.661	2.41956	165	1	20852578	20857113	4536	1	FBtr0081426	Others	Others	Others	Others	Others	Others	Others	Others	Others	Others	NA	0.258231	0.056904	Others
FBgn0032899	CG9338	35357	Promoter (<=1kb)	-154	chr2L	20864810	20865061	252	544.985	4.10745	119	1	20865215	20867311	2097	1	FBtr0081428	Others	Others	Others	Others	Others	Others	Others	Others	Others	Others	NA	-0.144609	0.328766	Others
FBgn0032901	sky	35359	Promoter (<=1kb)	254	chr2L	20889939	20890141	203	440.115	4.10745	166	1	20871335	20890395	19061	2	FBtr0081444	Others	Others	Others	Others	Others	Others	Others	Others	Others	Others	NA	0.865425	1.57e-06	Others
FBgn0053317	NA	NA	Intron (FBtr0081442/FBgn0032901, intron 2 of 10)	-3890	chr2L	20897103	20897244	142	200.104	3.65549	71	1	20901134	20901524	391	1	FBtr0089856	Others	Others	Others	Others	Others	Others	Others	Others	Others	Others	NA	NA	NA	Others
FBgn0032901	sky	35359	Intron (FBtr0081442/FBgn0032901, intron 1 of 10)	5808	chr2L	20911569	20911653	85	178.005	3.69551	33	1	20871335	20917461	46127	2	FBtr0081442	Others	Others	Others	Others	Others	Others	Others	Others	Others	Others	NA	0.865425	1.57e-06	Others
FBgn0032901	sky	35359	Promoter (1-2kb)	1894	chr2L	20915419	20915567	149	197.807	3.65982	55	1	20871335	20917461	46127	2	FBtr0081442	Others	Others	Others	Others	Others	Others	Others	Others	Others	Others	NA	0.865425	1.57e-06	Others
FBgn0032901	sky	35359	Promoter (<=1kb)	-602	chr2L	20918063	20918278	216	366.373	4.10745	108	1	20871335	20917461	46127	2	FBtr0330256	Others	Others	Others	Others	Others	Others	Others	Others	Others	Others	NA	0.865425	1.57e-06	Others
FBgn0032901	sky	35359	Promoter (<=1kb)	0	chr2L	20918858	20919034	177	387.751	4.10745	98	1	20871335	20918931	47597	2	FBtr0081440	Others	Others	Others	Others	Others	Others	Others	Others	Others	Others	NA	0.865425	1.57e-06	Others
FBgn0266369	Mtp	35362	Promoter (<=1kb)	355	chr2L	20922226	20922521	296	590.34	4.10745	179	1	20919094	20922876	3783	2	FBtr0081439	Others	Others	Others	Others	Others	Others	Others	Others	Others	Others	NA	-2.36545	3.13e-197	Others
FBgn0032907	CG9272	35365	Promoter (<=1kb)	0	chr2L	20927792	20927925	134	307.121	4.10745	71	1	20926319	20927860	1542	2	FBtr0089944	Mitochondria	Others	Others	Others	Others	Others	Others	Others	Others	Others	NA	1.58747	1.33e-08	MitoOthers
FBgn0032908	CG9270	35366	Promoter (<=1kb)	-730	chr2L	20934843	20934938	96	190.569	3.67059	63	1	20929456	20934113	4658	2	FBtr0306031	Others	Others	Others	Others	Others	Others	Others	Others	Others	Others	NA	1.6018	2.99e-13	Others
FBgn0032908	CG9270	35366	Promoter (1-2kb)	-1273	chr2L	20935386	20935715	330	146.214	2.46957	165	1	20929456	20934113	4658	2	FBtr0306031	Others	Others	Others	Others	Others	Others	Others	Others	Others	Others	NA	1.6018	2.99e-13	Others
FBgn0265817	lncRNA:CR44606	19835751	Distal Intergenic	3552	chr2L	20944460	20944618	159	266.551	4.10745	100	1	20947135	20948170	1036	2	FBtr0342649	Others	Others	Others	Others	Others	Others	Others	Others	Others	Others	NA	NA	NA	Others
FBgn0265817	lncRNA:CR44606	19835751	Promoter (2-3kb)	2601	chr2L	20945328	20945569	242	663.947	4.10745	121	1	20947135	20948170	1036	2	FBtr0342649	Others	Others	Others	Others	Others	Others	Others	Others	Others	Others	NA	NA	NA	Others
FBgn0265817	lncRNA:CR44606	19835751	Promoter (<=1kb)	-562	chr2L	20948732	20948895	164	277.265	4.10745	94	1	20947135	20948170	1036	2	FBtr0342649	Others	Others	Others	Others	Others	Others	Others	Others	Others	Others	NA	NA	NA	Others
FBgn0265817	lncRNA:CR44606	19835751	Promoter (2-3kb)	-2629	chr2L	20950799	20951009	211	388.838	4.10745	78	1	20947135	20948170	1036	2	FBtr0342649	Others	Others	Others	Others	Others	Others	Others	Others	Others	Others	NA	NA	NA	Others
FBgn0265817	lncRNA:CR44606	19835751	Distal Intergenic	-3074	chr2L	20951244	20951573	330	214.212	4.10745	165	1	20947135	20948170	1036	2	FBtr0342649	Others	Others	Others	Others	Others	Others	Others	Others	Others	Others	NA	NA	NA	Others
FBgn0250867	CG42238	7354398	Distal Intergenic	8537	chr2L	20960101	20960430	330	189.826	3.67207	165	1	20965520	20968967	3448	2	FBtr0290306	Others	Others	Others	Others	Others	Others	Others	Others	Others	Others	NA	2.1847	1.63e-68	Others
FBgn0250867	CG42238	7354398	Promoter (<=1kb)	0	chr2L	20968803	20969132	330	165.551	3.15608	165	1	20965520	20968967	3448	2	FBtr0290306	Others	Others	Others	Others	Others	Others	Others	Others	Others	Others	NA	2.1847	1.63e-68	Others
FBgn0250867	CG42238	7354398	Intron (FBtr0290305/FBgn0250867, intron 1 of 1)	-5343	chr2L	20974310	20974593	284	1036.76	4.10745	106	1	20965520	20968967	3448	2	FBtr0331200	Others	Others	Others	Others	Others	Others	Others	Others	Others	Others	NA	2.1847	1.63e-68	Others
FBgn0250867	CG42238	7354398	Intron (FBtr0290305/FBgn0250867, intron 1 of 1)	-13235	chr2L	20982202	20982531	330	174.301	3.48055	165	1	20965520	20968967	3448	2	FBtr0331200	Others	Others	Others	Others	Others	Others	Others	Others	Others	Others	NA	2.1847	1.63e-68	Others
FBgn0250867	CG42238	7354398	Intron (FBtr0290305/FBgn0250867, intron 1 of 1)	-18579	chr2L	20987546	20987744	199	518.733	4.10745	108	1	20965520	20968967	3448	2	FBtr0331200	Others	Others	Others	Others	Others	Others	Others	Others	Others	Others	NA	2.1847	1.63e-68	Others
FBgn0286733	snoRNA:Me28S-C2789	39877417	Intron (FBtr0290305/FBgn0250867, intron 1 of 1)	-25111	chr2L	21009394	21009664	271	954.043	4.10745	129	1	21034775	21034923	149	1	FBtr0474087	Others	Others	Others	Others	Others	Others	Others	Others	Others	Others	NA	NA	NA	Others
FBgn0286733	snoRNA:Me28S-C2789	39877417	Promoter (1-2kb)	1078	chr2L	21035853	21035974	122	188.817	3.67459	38	1	21034775	21034923	149	1	FBtr0474087	Others	Others	Others	Others	Others	Others	Others	Others	Others	Others	NA	NA	NA	Others
FBgn0286733	snoRNA:Me28S-C2789	39877417	Promoter (2-3kb)	2951	chr2L	21037726	21038055	330	197.418	3.66064	165	1	21034775	21034923	149	1	FBtr0474087	Others	Others	Others	Others	Others	Others	Others	Others	Others	Others	NA	NA	NA	Others
FBgn0286733	snoRNA:Me28S-C2789	39877417	Intron (FBtr0290305/FBgn0250867, intron 1 of 1)	4033	chr2L	21038808	21038999	192	371.385	4.10745	94	1	21034775	21034923	149	1	FBtr0474087	Others	Others	Others	Others	Others	Others	Others	Others	Others	Others	NA	NA	NA	Others
FBgn0250867	CG42238	7354398	Promoter (<=1kb)	0	chr2L	21051974	21052091	118	417.676	4.10745	32	1	20965520	21051983	86464	2	FBtr0290305	Others	Others	Others	Others	Others	Others	Others	Others	Others	Others	NA	2.1847	1.63e-68	Others
FBgn0040297	Nhe2	35376	Promoter (<=1kb)	0	chr2L	21104370	21104699	330	236.17	4.10745	165	1	21104568	21131984	27417	1	FBtr0334172	Others	Others	Others	Others	Others	Others	Others	Others	Others	Others	NA	0.721547	3.58e-05	Others
FBgn0032919	CG9253	35379	Promoter (<=1kb)	0	chr2L	21142930	21143268	339	1349.03	4.10745	174	1	21143229	21145146	1918	1	FBtr0081468	Others	Others	Others	Others	Others	Others	Others	Others	Others	Others	NA	-0.509147	1.23e-06	Others
FBgn0086251	del	35380	Promoter (<=1kb)	-579	chr2L	21149125	21149374	250	405.199	4.10745	102	1	21145137	21148546	3410	2	FBtr0333085	Others	Others	Others	Others	Others	Others	Others	Others	Others	Others	NA	1.38908	0.000765137	Others
FBgn0024371	E2f2	35381	Promoter (2-3kb)	2017	chr2L	21153886	21154215	330	272.004	4.10745	165	1	21154293	21156232	1940	2	FBtr0081501	Others	Others	Others	Others	Others	Others	Others	Others	Others	Others	Others	-0.519297	5.74e-09	Others
FBgn0024371	E2f2	35381	Promoter (<=1kb)	0	chr2L	21156190	21156368	179	374.845	4.10745	83	1	21154293	21156232	1940	2	FBtr0081501	Others	Others	Others	Others	Others	Others	Others	Others	Others	Others	Others	-0.519297	5.74e-09	Others
FBgn0024371	E2f2	35381	Promoter (<=1kb)	0	chr2L	21156632	21156961	330	159.767	2.93116	165	1	21154293	21156749	2457	2	FBtr0346451	Others	Others	Others	Others	Others	Others	Others	Others	Others	Others	Others	-0.519297	5.74e-09	Others
FBgn0032922	Coq3	35383	Promoter (<=1kb)	0	chr2L	21158564	21158783	220	545.226	4.10745	109	1	21157433	21158611	1179	2	FBtr0081500	Mitochondria	Others	Others	Others	Others	Others	Others	Others	Others	Others	NA	-0.983344	1.29e-08	MitoOthers
FBgn0032925	CG9246	35386	Promoter (<=1kb)	0	chr2L	21163516	21163679	164	312.84	4.10745	83	1	21163641	21166090	2450	1	FBtr0081472	Others	Others	Others	Others	Others	Others	Others	Others	Others	Others	NA	-1.02047	2.46e-34	Others
FBgn0263051	CG43346	13084069	Promoter (<=1kb)	0	chr2L	21166443	21166772	330	237.584	4.10745	165	1	21166046	21166624	579	2	FBtr0306976	Mitochondria	Others	Others	Others	Others	Others	Others	Others	Others	Others	NA	NA	NA	MitoOthers
FBgn0011829	Ret	43875	Promoter (1-2kb)	1922	chr2L	21196511	21196840	330	168.102	3.23846	165	1	21182446	21198762	16317	2	FBtr0081493	Others	Others	Others	Others	Others	Others	Others	Others	Others	Others	NA	0.416734	0.264467	Others
FBgn0003930	snRNA:U4:39B	3772712	Promoter (<=1kb)	0	chr2L	21214989	21215318	330	231	4.10745	165	1	21215036	21215178	143	2	FBtr0081489	Others	Others	Others	Others	Others	Others	Others	Others	Others	Others	NA	NA	NA	Others
FBgn0032934	CG8679	35395	Promoter (<=1kb)	0	chr2L	21218473	21218680	208	726.875	4.10745	109	1	21216004	21218544	2541	2	FBtr0081488	Others	Others	Others	Others	Others	Others	Others	Others	Others	Others	NA	1.08187	0.00112914	Others
FBgn0032935	Atg18b	35396	Promoter (<=1kb)	536	chr2L	21219707	21220036	330	202.648	3.65086	165	1	21212322	21220572	8251	2	FBtr0331678	Others	Others	Others	Others	Others	Others	Others	Others	Others	Others	NA	1.8496	1.81e-87	Others
FBgn0026577	CG8677	35397	Promoter (<=1kb)	0	chr2L	21221102	21221337	236	609.303	4.10745	113	1	21221312	21231692	10381	1	FBtr0331677	Others	Others	Others	Others	Others	Others	Others	Others	Others	Others	NA	0.366991	0.000333227	Others
FBgn0051626	CG31626	318859	Promoter (<=1kb)	611	chr2L	21235793	21236122	330	182.152	3.68744	165	1	21232495	21236733	4239	2	FBtr0081485	Others	Others	Others	Others	Others	Others	Others	Others	Others	Others	NA	-0.580994	2.65e-11	Others
FBgn0051626	CG31626	318859	Promoter (<=1kb)	0	chr2L	21236644	21237723	1080	20697.8	4.10745	520	1	21232495	21236733	4239	2	FBtr0081485	Others	Others	Others	Others	Others	Others	Others	Others	Others	Others	NA	-0.580994	2.65e-11	Others
FBgn0021856	l(2)k14505	35399	Intron (FBtr0081478/FBgn0261239, intron 2 of 4)	-9009	chr2L	21251830	21252159	330	141.105	2.3535	165	1	21261168	21262287	1120	1	FBtr0081482	Mitochondria	Others	Others	Others	Others	Others	Others	Others	Others	Others	NA	-0.998512	3.63e-29	MitoOthers
FBgn0021856	l(2)k14505	35399	Promoter (<=1kb)	-26	chr2L	21260980	21261142	163	346.236	4.10745	96	1	21261168	21262287	1120	1	FBtr0081482	Mitochondria	Others	Others	Others	Others	Others	Others	Others	Others	Others	NA	-0.998512	3.63e-29	MitoOthers
FBgn0032938	CG8671	35400	Promoter (<=1kb)	0	chr2L	21262816	21262981	166	399.49	4.10745	141	1	21262956	21282037	19082	1	FBtr0081483	Others	Others	Others	Others	Others	Others	Others	Others	Others	Others	NA	0.511056	1.97e-06	Others
FBgn0263536	mir-4974	12798033	Promoter (<=1kb)	-164	chr2L	21263664	21263769	106	266.991	4.10745	81	1	21263933	21264034	102	1	FBtr0309631	Others	Others	Others	Others	Others	Others	Others	Others	Others	Others	NA	NA	NA	Others
FBgn0032940	Mondo	35402	Promoter (<=1kb)	0	chr2L	21309995	21310315	321	489.276	4.10745	101	1	21286078	21310050	23973	2	FBtr0081524	Others	Others	Others	Others	Others	Others	Others	Others	Others	Others	Others	-0.447413	2.57e-12	Others
FBgn0000370	crc	47767	Promoter (<=1kb)	0	chr2L	21310699	21311038	340	613.487	4.10745	192	1	21310866	21319527	8662	1	FBtr0081512	Others	Others	Others	Others	Others	Others	Others	Others	Others	Others	Others	0.331018	9.37e-13	Others
FBgn0261586	lncRNA:CR42696	19836174	Promoter (1-2kb)	-1877	chr2L	21324454	21324783	330	200.886	3.65447	165	1	21326660	21327114	455	1	FBtr0344486	Others	Others	Others	Others	Others	Others	Others	Others	Others	Others	NA	NA	NA	Others
FBgn0023091	dimm	35404	Promoter (<=1kb)	-421	chr2L	21331006	21331335	330	159.349	2.93234	165	1	21331756	21342155	10400	1	FBtr0333354	Others	Others	Others	Others	Others	Others	Others	Others	Others	Others	Others	1.37074	0.0222544	Others
FBgn0032943	Tsp39D	35405	Promoter (<=1kb)	0	chr2L	21344146	21344795	650	1976.64	4.10745	392	1	21344607	21358271	13665	1	FBtr0273404	Others	Others	Others	Others	Others	Others	Others	Others	Others	Others	NA	0.949292	8.44e-16	Others
FBgn0032945	CG8665	35407	Promoter (<=1kb)	-72	chr2L	21370972	21371155	184	337.781	4.10745	73	1	21371227	21377995	6769	1	FBtr0081517	Mitochondria	Others	Others	Others	Others	Others	Others	Others	Others	Others	NA	1.2472	2.81e-10	MitoOthers
FBgn0051616	NA	NA	Distal Intergenic	-6557	chr2L	21397295	21397624	330	148.405	2.47968	165	1	21404181	21404495	315	1	FBtr0085889	Others	Others	Others	Others	Others	Others	Others	Others	Others	Others	NA	NA	NA	Others
FBgn0032949	Lamp1	35411	Distal Intergenic	-13435	chr2L	21559798	21559954	157	248.202	4.10745	84	1	21573389	21577103	3715	1	FBtr0085896	Others	Others	Others	Others	Others	Others	Others	Others	Others	Others	NA	0.322084	9.2e-07	Others
FBgn0032949	Lamp1	35411	Promoter (<=1kb)	0	chr2L	21573225	21573455	231	541.202	4.10745	118	1	21573389	21577103	3715	1	FBtr0085896	Others	Others	Others	Others	Others	Others	Others	Others	Others	Others	NA	0.322084	9.2e-07	Others
FBgn0032955	CG2201	35417	Promoter (<=1kb)	-358	chr2L	21619132	21619461	330	159.203	2.93261	165	1	21616671	21618774	2104	2	FBtr0100511	Others	Others	Others	Others	Others	Others	Others	Others	Others	Others	NA	0.481981	2.06e-07	Others
FBgn0032955	CG2201	35417	Promoter (<=1kb)	0	chr2L	21624014	21624248	235	486.387	4.10745	103	1	21614766	21624080	9315	2	FBtr0345685	Others	Others	Others	Others	Others	Others	Others	Others	Others	Others	NA	0.481981	2.06e-07	Others
FBgn0262631	lncRNA:CR43148	12798034	Promoter (<=1kb)	0	chr2L	21624530	21624725	196	351.043	4.10745	77	1	21624679	21625388	710	1	FBtr0305496	Others	Others	Others	Others	Others	Others	Others	Others	Others	Others	NA	NA	NA	Others
FBgn0022893	Df31	35418	Promoter (<=1kb)	345	chr2L	21629258	21629587	330	191.594	3.66885	165	1	21626309	21629932	3624	2	FBtr0100293	Others	Others	Others	Others	Others	Others	Others	Others	Others	Others	NA	-0.791611	1.28e-40	Others
FBgn0022893	Df31	35418	Promoter (<=1kb)	0	chr2L	21629932	21630081	150	385.724	4.10745	58	1	21626309	21629932	3624	2	FBtr0100293	Others	Others	Others	Others	Others	Others	Others	Others	Others	Others	NA	-0.791611	1.28e-40	Others
FBgn0262620	lncRNA:CR43144	19834780	Promoter (<=1kb)	0	chr2L	21657445	21657692	248	395.965	4.10745	164	1	21657625	21658249	625	1	FBtr0342857	Others	Others	Others	Others	Others	Others	Others	Others	Others	Others	NA	NA	NA	Others
FBgn0032956	Cul2	35420	Promoter (<=1kb)	0	chr2L	21658555	21658815	261	492.548	4.10745	145	1	21658735	21663210	4476	1	FBtr0085900	Others	Others	Others	Others	Others	Others	Others	Others	Others	Others	NA	0.184188	0.0479198	Others
FBgn0032957	CG2225	35421	Promoter (<=1kb)	-99	chr2L	21677629	21677958	330	189.544	3.67293	165	1	21663806	21677530	13725	2	FBtr0332967	Others	Others	Others	Others	Others	Others	Others	Others	Others	Others	NA	1.26248	3.8e-09	Others
FBgn0000559	eEF2	35422	Promoter (<=1kb)	0	chr2L	21681963	21682275	313	617.945	4.10745	160	1	21677913	21682116	4204	2	FBtr0332966	Others	Others	Others	Others	Others	Others	Others	Others	Others	Others	NA	-0.537634	4.06e-68	Others
FBgn0086779	step	35425	Promoter (<=1kb)	0	chr2L	21757336	21757631	296	833.698	4.10745	143	1	21740041	21757466	17426	2	FBtr0332471	Others	Others	Others	Others	Others	Others	Others	Others	Others	Others	NA	0.983439	6.22e-23	Others
FBgn0032961	CG1416	35426	Promoter (<=1kb)	0	chr2L	21757894	21758077	184	230.634	4.10745	92	1	21758010	21760915	2906	1	FBtr0085904	Others	Others	Others	Others	Others	Others	Others	Others	Others	Others	NA	-0.925707	1.8e-44	Others
FBgn0032964	CG11630	35429	Intron (FBtr0085908/FBgn0051612, intron 1 of 3)	-3036	chr2L	21787101	21787289	189	441.303	4.10745	89	1	21782046	21784065	2020	2	FBtr0085909	Others	Others	Others	Others	Others	Others	Others	Others	Others	Others	NA	NA	NA	Others
FBgn0051612	CG31612	35427	Promoter (<=1kb)	349	chr2L	21794794	21795098	305	2055.82	4.10745	162	1	21762314	21795447	33134	2	FBtr0085908	Others	Others	Others	Others	Others	Others	Others	Others	Others	Others	Others	1.07946	0.0424295	Others
FBgn0266222	lncRNA:CR44917	19835662	Distal Intergenic	-8408	chr2L	21846456	21846686	231	786.415	4.10745	98	1	21855094	21869759	14666	1	FBtr0343879	Others	Others	Others	Others	Others	Others	Others	Others	Others	Others	NA	NA	NA	Others
FBgn0266222	lncRNA:CR44917	19835662	Promoter (<=1kb)	66	chr2L	21867333	21867628	296	2009.57	4.10745	149	1	21867267	21869759	2493	1	FBtr0343877	Others	Others	Others	Others	Others	Others	Others	Others	Others	Others	NA	NA	NA	Others
FBgn0028979	tio	44272	3' UTR	5189	chr2L	22024511	22024840	330	235.786	4.10745	165	1	22019322	22025734	6413	1	FBtr0089377	Others	Others	Others	Others	Others	Others	Others	Others	Others	Others	Others	2.04981	1.15e-05	Others
FBgn0084001	CG41434	4379897	Promoter (<=1kb)	-666	chr2L	22036865	22037194	330	169.678	3.34425	165	1	22037860	22039772	1913	1	FBtr0332200	Others	Others	Others	Others	Others	Others	Others	Others	Others	Others	NA	2.05325	0.211615	Others
FBgn0032974	CG3651	35440	Promoter (<=1kb)	-50	chr2L	22120984	22121288	305	650.062	4.10745	153	1	22121338	22125151	3814	1	FBtr0331655	Others	Others	Others	Others	Others	Others	Others	Others	Others	Others	NA	-0.119229	0.36134	Others
FBgn0032974	CG3651	35440	Promoter (<=1kb)	0	chr2L	22121608	22121913	306	872.12	4.10745	170	1	22121840	22125120	3281	1	FBtr0331656	Others	Others	Others	Others	Others	Others	Others	Others	Others	Others	NA	-0.119229	0.36134	Others
FBgn0025674	CycK	49816	Promoter (<=1kb)	0	chr2L	22129915	22130320	406	1123.63	4.10745	205	1	22124285	22130142	5858	2	FBtr0344022	Others	Others	Others	Others	Others	Others	Others	Others	Others	Others	NA	-0.202904	0.0437277	Others
FBgn0261802	CG42748	35442	Promoter (<=1kb)	0	chr2L	22131208	22131491	284	792.781	4.10745	168	1	22131221	22159611	28391	1	FBtr0333742	Others	Others	Others	Others	Others	Others	Others	Others	Others	Others	NA	0.821979	4.87e-36	Others
FBgn0261802	CG42748	35442	Promoter (1-2kb)	-1002	chr2L	22133002	22133331	330	211.624	3.63377	165	1	22134333	22159611	25279	1	FBtr0303271	Others	Others	Others	Others	Others	Others	Others	Others	Others	Others	NA	0.821979	4.87e-36	Others
FBgn0032979	Clamp	35445	Promoter (<=1kb)	339	chr2L	22168475	22168804	330	148.671	2.49464	165	1	22165720	22169143	3424	2	FBtr0100407	Others	Others	Others	Others	Others	Others	Others	Others	Others	Others	Others	0.11424	0.165866	Others
FBgn0032979	Clamp	35445	Promoter (<=1kb)	0	chr2L	22169099	22169493	395	1271.04	4.10745	152	1	22165720	22169143	3424	2	FBtr0100407	Others	Others	Others	Others	Others	Others	Others	Others	Others	Others	Others	0.11424	0.165866	Others
FBgn0032986	CG3262	35452	Promoter (<=1kb)	0	chr2L	22239589	22240083	495	2557.42	4.10745	270	1	22239916	22240881	966	1	FBtr0334169	Mitochondria	Others	Others	Others	Others	Others	Others	Others	Others	Others	NA	0.347698	4.72e-06	MitoOthers
FBgn0032987	RpL21	35453	Promoter (<=1kb)	0	chr2L	22247727	22248030	304	1539.44	4.10745	153	1	22247111	22247833	723	2	FBtr0331295	Others	Others	Others	Others	Others	Others	Others	Others	Others	Others	NA	-0.288763	3.58e-09	Others
FBgn0032988	Tif-IA	35454	Promoter (<=1kb)	0	chr2L	22249741	22249993	253	655.303	4.10745	150	1	22249876	22258260	8385	1	FBtr0085955	Others	Others	Others	Others	Others	Others	Others	Others	Others	Others	NA	-0.379222	2.81e-05	Others
FBgn0039972	Marf1	49895	Distal Intergenic	-18267	chr2L	22290159	22290488	330	177.031	3.69743	165	1	22308755	22368796	60042	1	FBtr0306235	Others	Others	Others	Others	Others	Others	Others	Others	Others	Others	NA	1.32989	0.0160184	Others
FBgn0039972	Marf1	49895	Distal Intergenic	-15695	chr2L	22292876	22293060	185	284.667	4.10745	101	1	22308755	22368796	60042	1	FBtr0306235	Others	Others	Others	Others	Others	Others	Others	Others	Others	Others	NA	1.32989	0.0160184	Others
FBgn0039972	Marf1	49895	Intron (FBtr0306235/FBgn0039972, intron 6 of 10)	10282	chr2L	22364637	22364795	159	156.157	2.85668	90	1	22354355	22368776	14422	1	FBtr0306236	Others	Others	Others	Others	Others	Others	Others	Others	Others	Others	NA	1.32989	0.0160184	Others
FBgn0064225	RpL5	3355124	Promoter (<=1kb)	0	chr2L	22536522	22537230	709	12984.8	4.10745	232	1	22532279	22536884	4606	2	FBtr0344793	Others	Others	Others	Others	Others	Others	Others	Others	Others	Others	NA	0.264841	2.47e-12	Others
FBgn0040009	CG17490	3355125	Promoter (<=1kb)	0	chr2L	22537981	22538462	482	3315.21	4.10745	228	1	22538230	22540597	2368	1	FBtr0302386	Others	Others	Others	Others	Others	Others	Others	Others	Others	Others	NA	0.466369	0.837229	Others
FBgn0278598	lncRNA:CR46268	26067578	Intron (FBtr0415459/FBgn0278598, intron 2 of 2)	3280	chr2L	22541570	22541899	330	156.091	2.85704	165	1	22538290	22548452	10163	1	FBtr0415457	Others	Others	Others	Others	Others	Others	Others	Others	Others	Others	NA	NA	NA	Others
FBgn0040010	CG17493	3355126	Promoter (<=1kb)	0	chr2L	22550052	22550448	397	1347.44	4.10745	180	1	22550064	22551785	1722	1	FBtr0332630	Others	Others	Others	Others	Others	Others	Others	Others	Others	Others	NA	0.522084	1.57e-08	Others
FBgn0040010	CG17493	3355126	Distal Intergenic	8069	chr2L	22558309	22558638	330	141.769	2.36268	165	1	22550240	22556295	6056	1	FBtr0332632	Others	Others	Others	Others	Others	Others	Others	Others	Others	Others	NA	0.522084	1.57e-08	Others
FBgn0040011	Slmap	3355127	Distal Intergenic	-11297	chr2L	22567501	22567775	275	626.91	4.10745	118	1	22579072	22585843	6772	1	FBtr0111252	Others	Others	Others	Others	Others	Others	Others	Others	Others	Others	NA	-0.709029	7.7e-11	Others
FBgn0040011	Slmap	3355127	Distal Intergenic	-9207	chr2L	22569633	22569865	233	276.244	4.10745	80	1	22579072	22585843	6772	1	FBtr0111252	Others	Others	Others	Others	Others	Others	Others	Others	Others	Others	NA	-0.709029	7.7e-11	Others
FBgn0040011	Slmap	3355127	Distal Intergenic	-8670	chr2L	22570149	22570402	254	441.87	4.10745	109	1	22579072	22585843	6772	1	FBtr0111252	Others	Others	Others	Others	Others	Others	Others	Others	Others	Others	NA	-0.709029	7.7e-11	Others
FBgn0040011	Slmap	3355127	Distal Intergenic	-6187	chr2L	22572556	22572885	330	179.892	3.69164	165	1	22579072	22585843	6772	1	FBtr0111252	Others	Others	Others	Others	Others	Others	Others	Others	Others	Others	NA	-0.709029	7.7e-11	Others
FBgn0040011	Slmap	3355127	Distal Intergenic	-5256	chr2L	22573487	22573816	330	155.116	2.82308	165	1	22579072	22585843	6772	1	FBtr0111252	Others	Others	Others	Others	Others	Others	Others	Others	Others	Others	NA	-0.709029	7.7e-11	Others
FBgn0040011	Slmap	3355127	Distal Intergenic	-4293	chr2L	22574279	22574779	501	2600.72	4.10745	261	1	22579072	22585843	6772	1	FBtr0111252	Others	Others	Others	Others	Others	Others	Others	Others	Others	Others	NA	-0.709029	7.7e-11	Others
FBgn0040011	Slmap	3355127	Promoter (<=1kb)	-240	chr2L	22577690	22578832	1143	681.674	4.10745	411	1	22579072	22585843	6772	1	FBtr0111252	Others	Others	Others	Others	Others	Others	Others	Others	Others	Others	NA	-0.709029	7.7e-11	Others
FBgn0040011	Slmap	3355127	Promoter (<=1kb)	-240	chr2L	22577690	22578832	1143	277.974	4.10745	880	1	22579072	22585843	6772	1	FBtr0111252	Others	Others	Others	Others	Others	Others	Others	Others	Others	Others	NA	-0.709029	7.7e-11	Others
FBgn0040011	Slmap	3355127	Promoter (<=1kb)	0	chr2L	22578823	22579587	765	13035.7	4.10745	280	1	22579072	22585843	6772	1	FBtr0111252	Others	Others	Others	Others	Others	Others	Others	Others	Others	Others	NA	-0.709029	7.7e-11	Others
FBgn0264548	lncRNA:CR43927	14462816	Intron (FBtr0111230/FBgn0058006, intron 1 of 9)	14484	chr2L	22737099	22737311	213	502.446	4.10745	109	1	22751304	22751795	492	2	FBtr0333244	Others	Others	Others	Others	Others	Others	Others	Others	Others	Others	NA	NA	NA	Others
FBgn0058006	CG40006	3355123	Promoter (<=1kb)	-668	chr2L	22757017	22757123	107	201.393	3.65337	45	1	22622417	22756349	133933	2	FBtr0111230	Others	Others	Others	Others	Others	Others	Others	Others	Others	Others	NA	0.0596697	0.705067	Others
FBgn0058006	CG40006	3355123	Promoter (1-2kb)	-1903	chr2L	22758252	22758501	250	732.789	4.10745	110	1	22622417	22756349	133933	2	FBtr0111230	Others	Others	Others	Others	Others	Others	Others	Others	Others	Others	NA	0.0596697	0.705067	Others
FBgn0058439	CG40439	3355120	Promoter (<=1kb)	-53	chr2L	22798329	22798527	199	305.308	4.10745	138	1	22797519	22798276	758	2	FBtr0111233	Others	Others	Others	Others	Others	Others	Others	Others	Others	Others	NA	0.216597	0.768442	Others
FBgn0002566	lt	3355130	Promoter (<=1kb)	-480	chr2L	22923986	22924315	330	193.529	3.66642	165	1	22924795	22940527	15733	1	FBtr0111123	Others	Others	Others	Others	Others	Others	Others	Others	Others	Others	NA	0.089939	0.37185	Others
FBgn0002566	lt	3355130	Promoter (<=1kb)	0	chr2L	22924624	22924962	339	1081.51	4.10745	148	1	22924795	22940527	15733	1	FBtr0111123	Others	Others	Others	Others	Others	Others	Others	Others	Others	Others	NA	0.089939	0.37185	Others
FBgn0000384	cta	3355131	Distal Intergenic	-3800	chr2L	22977687	22978016	330	164.703	3.1574	165	1	22981816	22992343	10528	1	FBtr0111126	Others	Others	Others	Others	Others	Others	Others	Others	Others	Others	NA	0.614205	2.25e-07	Others
FBgn0000384	cta	3355131	Promoter (<=1kb)	-810	chr2L	22980846	22981006	161	282.964	4.10745	148	1	22981816	22992343	10528	1	FBtr0111126	Others	Others	Others	Others	Others	Others	Others	Others	Others	Others	NA	0.614205	2.25e-07	Others
FBgn0000384	cta	3355131	Promoter (<=1kb)	0	chr2L	22981615	22982043	429	4890.26	4.10745	169	1	22981816	22992343	10528	1	FBtr0111126	Others	Others	Others	Others	Others	Others	Others	Others	Others	Others	NA	0.614205	2.25e-07	Others
FBgn0000384	cta	3355131	Promoter (<=1kb)	409	chr2L	22982225	22982554	330	157.529	2.93691	165	1	22981816	22992951	11136	1	FBtr0334157	Others	Others	Others	Others	Others	Others	Others	Others	Others	Others	NA	0.614205	2.25e-07	Others
FBgn0086683	Spf45	3355114	Promoter (2-3kb)	2660	chr2L	23065175	23065531	357	1328.45	4.10745	191	1	23066874	23068191	1318	2	FBtr0111241	Others	Others	Others	Others	Others	Others	Others	Others	Others	Others	NA	0.223164	0.0139289	Others
FBgn0086683	Spf45	3355114	Promoter (<=1kb)	0	chr2L	23068199	23068565	367	2287.64	4.10745	216	1	23066874	23068386	1513	2	FBtr0111239	Others	Others	Others	Others	Others	Others	Others	Others	Others	Others	NA	0.223164	0.0139289	Others
FBgn0262887	lncRNA:CR43242	12798537	Promoter (<=1kb)	0	chr2L	23068795	23069093	299	184.795	3.68199	160	1	23069005	23070724	1720	1	FBtr0306299	Others	Others	Others	Others	Others	Others	Others	Others	Others	Others	NA	NA	NA	Others
FBgn0262887	lncRNA:CR43242	12798537	Promoter (<=1kb)	221	chr2L	23069226	23069356	131	210.754	3.63532	100	1	23069005	23070724	1720	1	FBtr0306299	Others	Others	Others	Others	Others	Others	Others	Others	Others	Others	NA	NA	NA	Others
FBgn0262887	lncRNA:CR43242	12798537	Distal Intergenic	6406	chr2L	23075411	23075749	339	568.271	4.10745	180	1	23069005	23070724	1720	1	FBtr0306299	Others	Others	Others	Others	Others	Others	Others	Others	Others	Others	NA	NA	NA	Others
FBgn0265254	lncRNA:CR44268	19835105	Promoter (<=1kb)	0	chr2L	23172927	23173256	330	185.467	3.68067	165	1	23173073	23173465	393	1	FBtr0339231	Others	Others	Others	Others	Others	Others	Others	Others	Others	Others	NA	NA	NA	Others
FBgn0039958	CG12567	3355094	Promoter (<=1kb)	0	chr2L	23174249	23174576	328	987.151	4.10745	174	1	23161122	23174392	13271	2	FBtr0113704	Others	Others	Others	Others	Others	Others	Others	Others	Others	Others	NA	0.309619	0.00424711	Others
FBgn0039958	CG12567	3355094	Promoter (1-2kb)	-1477	chr2L	23175961	23176384	424	3259.9	4.10745	234	1	23161122	23174484	13363	2	FBtr0300704	Others	Others	Others	Others	Others	Others	Others	Others	Others	Others	NA	0.309619	0.00424711	Others
FBgn0267976	Tim23	3355096	Promoter (<=1kb)	0	chr2L	23313377	23313818	442	9720.54	4.10745	273	1	23312465	23313578	1114	2	FBtr0113781	Mitochondria	Others	Others	Others	Others	Others	Others	Protein_import_insertion_mito	Others	Others	NA	-1.82768	4.13e-156	Mito_EBR
FBgn0267976	Tim23	3355096	Promoter (1-2kb)	-1320	chr2L	23314898	23315465	568	3182.35	4.10745	333	1	23312465	23313578	1114	2	FBtr0113781	Mitochondria	Others	Others	Others	Others	Others	Others	Protein_import_insertion_mito	Others	Others	NA	-1.82768	4.13e-156	Mito_EBR
FBgn0069969	CG40498	3354890	Promoter (2-3kb)	-2699	chr2R	930685	931014	330	177.01	3.69749	165	2	926097	927986	1890	2	FBtr0308894	Others	Others	Others	Others	Others	Others	Others	Others	Others	Others	NA	2.09646	1.17e-35	Others
FBgn0069969	CG40498	3354890	Distal Intergenic	-48698	chr2R	999950	1000258	309	513.577	4.10745	101	2	926097	951252	25156	2	FBtr0344187	Others	Others	Others	Others	Others	Others	Others	Others	Others	Others	NA	2.09646	1.17e-35	Others
FBgn0085582	lncRNA:CR41257	19835919	Promoter (<=1kb)	231	chr2R	1070719	1071088	370	405.577	4.10745	135	2	1070657	1071319	663	2	FBtr0344616	Others	Others	Others	Others	Others	Others	Others	Others	Others	Others	NA	NA	NA	Others
FBgn0003256	rl	3354888	Promoter (<=1kb)	0	chr2R	1071141	1072430	1290	1277.59	4.10745	249	2	1071462	1121107	49646	1	FBtr0113703	Others	Others	Others	Others	Others	Others	Others	Others	Others	Others	NA	-0.179857	0.219168	Others
FBgn0003256	rl	3354888	Promoter (<=1kb)	0	chr2R	1071141	1072430	1290	7090.63	4.10745	805	2	1071462	1121107	49646	1	FBtr0113703	Others	Others	Others	Others	Others	Others	Others	Others	Others	Others	NA	-0.179857	0.219168	Others
FBgn0003256	rl	3354888	Promoter (<=1kb)	797	chr2R	1072772	1073101	330	258.734	4.10745	165	2	1071975	1125927	53953	1	FBtr0345337	Others	Others	Others	Others	Others	Others	Others	Others	Others	Others	NA	-0.179857	0.219168	Others
FBgn0085732	NA	NA	Promoter (<=1kb)	0	chr2R	1211017	1211296	280	255.332	4.10745	104	2	1211067	1213666	2600	1	FBtr0334740	Others	Others	Others	Others	Others	Others	Others	Others	Others	Others	NA	NA	NA	Others
FBgn0085732	NA	NA	Promoter (<=1kb)	0	chr2R	1211441	1211718	278	536.315	4.10745	144	2	1211544	1213666	2123	1	FBtr0334739	Others	Others	Others	Others	Others	Others	Others	Others	Others	Others	NA	NA	NA	Others
FBgn0058191	CG40191	3354930	Distal Intergenic	-20415	chr2R	1243396	1243725	330	162.183	3.02816	165	2	1264140	1266162	2023	1	FBtr0113827	Others	Others	Others	Others	Others	Others	Others	Others	Others	Others	NA	-2.65519	1.33e-128	Others
FBgn0058191	CG40191	3354930	Promoter (<=1kb)	0	chr2R	1263870	1265008	1139	6777.17	4.10745	453	2	1264140	1266162	2023	1	FBtr0113827	Others	Others	Others	Others	Others	Others	Others	Others	Others	Others	NA	-2.65519	1.33e-128	Others
FBgn0058191	CG40191	3354930	Promoter (<=1kb)	0	chr2R	1263870	1265008	1139	435.078	4.10745	959	2	1264140	1266162	2023	1	FBtr0113827	Others	Others	Others	Others	Others	Others	Others	Others	Others	Others	NA	-2.65519	1.33e-128	Others
FBgn0267398	Yeti	7354404	Distal Intergenic	6119	chr2R	1338821	1339000	180	413.19	4.10745	98	2	1343403	1345119	1717	2	FBtr0344755	Others	Others	Others	Others	Others	Others	Others	Others	Others	Others	NA	-0.238653	0.00302064	Others
FBgn0267398	Yeti	7354404	Distal Intergenic	5129	chr2R	1339661	1339990	330	369.642	4.10745	165	2	1343403	1345119	1717	2	FBtr0344755	Others	Others	Others	Others	Others	Others	Others	Others	Others	Others	NA	-0.238653	0.00302064	Others
FBgn0267398	Yeti	7354404	Promoter (<=1kb)	0	chr2R	1344918	1345396	479	3979.38	4.10745	236	2	1343403	1345119	1717	2	FBtr0344755	Others	Others	Others	Others	Others	Others	Others	Others	Others	Others	NA	-0.238653	0.00302064	Others
[truncated: 7,261 more rows]
